# Supplementary material for: BUB-1 promotes amphitelic chromosome biorientation via multiple activities at the kinetochore
Source: eLife journal article supplement (doi:10.7554/elife.40690), 2018-12-14
Supplement: supp [file elife-40690-supp-v1.zip]

Archive with 47 entries (47 files):
- elife_poa_e40690_Figure_1_figure_supplement_1_source_data_1.xlsx
- elife_poa_e40690_Video_1.mov
- elife_poa_e40690_Figure_5_figure_supplement_2_source_data_2.xlsx
- elife_poa_e40690_Figure_3_figure_supplement_1_source_data_1.xlsx
- elife_poa_e40690_Figure_5_figure_supplement_2_source_data_5.xlsx
- elife_poa_e40690_Figure_5_figure_supplement_2.ai
- elife_poa_e40690_Figure_4_figure_supplement_1_source_data_1.xlsx
- elife_poa_e40690_Figure_4_source_data_2.xlsx
- elife_poa_e40690_Figure_2_source_data_1.xlsx
- elife_poa_e40690_Figure_3_figure_supplement_1.ai
- elife_poa_e40690_Figure_4_figure_supplement_1_source_data_3.xlsx
- elife_poa_e40690_Figure_2_source_data_2.xlsx
- elife_poa_e40690_Figure_1_figure_supplement_1.ai
- elife_poa_e40690_Video_4.mov
- elife_poa_e40690_Figure_4_figure_supplement_1.ai
- elife_poa_e40690_Figure_5_figure_supplement_1_source_data_1.xlsx
- elife_poa_e40690_Figure_1_figure_supplement_2_source_data_1.xlsx
- elife_poa_e40690_Figure_5_figure_supplement_2_source_data_3.xlsx
- elife_poa_e40690_Figure_5_source_data_2.xlsx
- elife_poa_e40690_Figure_5_figure_supplement_2_source_data_1.xlsx
- elife_poa_e40690_Figure_2_figure_supplement_1_source_data_1.xlsx
- elife_poa_e40690_Figure_5_source_data_1.xlsx
- elife_poa_e40690_Figure_1_figure_supplement_2.ai
- elife_poa_e40690_Figure_3_source_data_1.xlsx
- elife_poa_e40690_Video_5.mov
- elife_poa_e40690_Figure_1_figure_supplement_1_source_data_2.xlsx
- elife_poa_e40690_Figure_5_figure_supplement_1.ai
- elife_poa_e40690_Figure_1_source_data_2.xlsx
- elife_poa_e40690_Figure_1_source_data_3.xlsx
- elife_poa_e40690_Figure_4_figure_supplement_1_source_data_2.xlsx
- elife_poa_e40690_Figure_4_source_data_3.xlsx
- elife_poa_e40690_Video_2.mov
- elife_poa_e40690_Figure_5_figure_supplement_2_source_data_4.xlsx
- elife_poa_e40690_Figure_3_source_data_2.xlsx
- elife_poa_e40690_Figure_6_source_data_4.xlsx
- elife_poa_e40690_Figure_3_figure_supplement_1_source_data_2.xlsx
- elife_poa_e40690_Transparent_Reporting_File.pdf
- elife_poa_e40690_Figure_4_source_data_1.xlsx
- elife_poa_e40690_Video_3.mov
- elife_poa_e40690_Supplementary_File_1.docx
- elife_poa_e40690_Figure_6_source_data_3.xlsx
- elife_poa_e40690_Figure_5_source_data_3.xlsx
- elife_poa_e40690_Figure_6_source_data_2.xlsx
- elife_poa_e40690_Figure_1_source_data_1.xlsx
- elife_poa_e40690_Figure_2_figure_supplement_1.ai
- elife_poa_e40690_Figure_3_figure_supplement_1_source_data_3.xlsx
- elife_poa_e40690_Figure_6_source_data_1.xlsx
