# Supplementary material for: BUB-1 promotes amphitelic chromosome biorientation via multiple activities at the kinetochore
Source: eLife journal article supplement (doi:10.7554/elife.40690), 2018-12-14
Supplement: supp [file elife-40690-supp-v1.zip › elife_poa_e40690_Figure_1_figure_supplement_1_source_data_1.xlsx]

## Sheet: PHX441_Control
time from nebd (s)	embryo_1	embryo_2	embryo_3	embryo_4	embryo_5	embryo_6	embryo_7	embryo_8	embryo_9	embryo_10	embryo_11	embryo_12	embryo_13	embryo_14	embryo_15
0	310.348		222.058	180.138	264.635	106.79	175.903	180.858	211.072	168.031	247.681	196.339
10	295.974		257.705	222.176	301.488	137.879	177.926	239.225	280.104	199.628	238.713	280.165
20	333.394		310.513	289.634	337.225	137.999	176.13	251.987	364.82	251.388	276.577	326.261
30	452.922		342.056	386.206	403.654	189.401	212.321	339.045	365.941	277.269	424.105	450.7
40	417.656		333.699	353.605	415.603	252.302	276.12	357.998	426.213	408.736	431.712	468.587
50	464.735		375.353	355.776	462.313	263.367	334.976	432.808	453.048	417.239	508.391	521.425
60	506.245		389.374	361.235	499.512	306.398	400.135	451.473	481.096	461.304	613.447	550.813
70	646.833		421.714	422.484	535.116	354.058	438.959	421.927	557.445	584.489	607.117	581.561
80	623.325		428.458	437.442	625.313	444.087	484.448	461.551	514.181	578.042	611.255	559.381
90	663.447		449.359	437.083	760.351	467.467	514.584	477.552	533.72	608.945	686.714	604.038
100	678.61		491.319	426.462	844.904	517.488	510.871	516.415	590.025	568.221	715.736	639.569
110	692.423		480.21	530.17	842.661	577.606	529.563	503.408	605.85	555.06	683.375	526.21
120	702.015		522.599	483.068	875.288	581.74	582.896	524.417	633.143	609.118	690.649	554.761
130	710.653		535.028	533.22	787.91	577.322	634.121	516.293	620.232	604.047	615.97	595.553
140	688.78		549.314	538.681	798.403	607.172	699.87	588.657	720.114	622.058	876.263	650.815
150	746.037		602.89	594.437	829.36	625.131	678.373	539.163	535.805	625.78	902.861	708.776
160	942.95		592.945	697.603	914.721	695.274	791.494	344.459	462.674	699.248	910.274	535.337
170	650.401		596.008	616.661	792.093	603.627	822.184	287.042	256.669	621.046	948.249	282.026
180	665.363		543.357	540.523	601.83	530.95	668.997	255.494	213.523	591.536	807.177	182.293
190	685.491		494.81	428.291	468.405	355.57	526.229	112.039	100.429	376.522	510.437	103.945
200	361.96		366.025	292.546	327.634	331.964	369.871	50.2362	44.4624	234.255	335.921	41.4334
210	336.559		376.787	216.594	165.922	124.837	227.067	27.5686	28.1667	136.489	203.898	15.3245
220	322.52		258.257	117.229	112.031	91.7346	106.725	19.2789	19.5083	71.4959	91.7418	14.882
230	119.865		127.969	70.8697	54.6974	42.4237	49.5182	12.7515	14.1396	36.3533	57.6338	9.42317
240	91.9353		83.175	43.5347	30.2827	24.7655	35.7025	6.86066	11.6209	24.8532	36.29	1.95232
250	71.4317		49.7655	30.414	21.2548	14.9182	19.9296	5.12319	6.74418	18.4026	32.0136	1.92126
260	37.6585		35.7382	25.8988	12.788	9.50425	8.85943	2.4167	5.47723	12.9136	27.1956	-0.00840734
270	28.1893		25.644	16.7788	10.3585	7.84339	6.82149	1.60209	2.48734	8.41413	23.6312	-0.402542
280	19.4082		18.5106	15.1251	6.6806	7.99793	1.0835	-0.062914	1.33893	4.18792	19.5373	-2.49978
290	18.3376		11.7207	13.7159	1.81128	4.94869	0.148438	-2.82729	-1.82287	3.62838	17.1462	-4.44033
300	13.6822		10.3174	10.2958	1.22271	0.714184	-6.77048	-1.27233	-0.663703	0.129315	13.0262	-3.79011
310
320
330
340
350
360
370
380
390
400
410
420
430
440
450
460
470
480
490
500
510
520
530
540
550
560
570
580
590
600
610
620
630

## Sheet: PHX441_bub-1
time from nebd (s)	embryo_1	embryo_2	embryo_3	embryo_4	embryo_5	embryo_6	embryo_7	embryo_8	embryo_9	embryo_10	embryo_11	embryo_12	embryo_13	embryo_14	embryo_15
0	54.3611	110.153	111.125	74.4305	111.476	67.0952	229.065	301.27
10	64.3092	125.106	176.356	76.9343	137.988	90.6463	273.423	329.267
20	85.3232	140.128	194.546	90.2356	142.79	138.964	257.894	342.745
30	116.419	163.376	214.636	80.9767	147.693	133.002	267.294	328.059
40	123.416	204.685	301.692	91.8254	151.368	180.073	265.281	318.292
50	116.534	216.21	351.332	127.114	190.981	214.936	311.183	287.163
60	174.951	234.072	376.255	169.964	242.953	250.909	357.272	242.873
70	212.411	249.21	407.935	205.565	243.591	262.561	337.754	220.434
80	257.793	270.605	438.994	241.48	262.236	267.14	340.812	197.098
90	295.718	264.751	344.152	240.221	257.469	233.789	344.091	170.879
100	265.535	234.983	319.593	244.903	285.479	197.883	346.834	143.021
110	267.543	213.581	303.538	216.838	279.683	160.184	317.032	127.513
120	222.438	156.43	223.894	176.139	253.164	147.513	293.134	104.014
130	199.135	145.471	178.928	131.27	205.64	122.343	227.317	81.692
140	176.26	107.895	106.066	101.009	153.819	98.2426	182.057	55.7435
150	151.852	84.8702	76.4144	78.7268	140.645	67.2581	138.542	42.0414
160	123.882	59.7585	55.3353	59.0324	101.607	60.1052	136.338	29.6202
170	93.2803	42.1252	41.7874	49.4869	83.5352	51.6366	110.166	24.0347
180	72.9576	32.2459	36.3772	43.4021	80.5005	45.2693	85.9623	17.8117
190	57.0045	23.9601	29.5067	36.8884	76.3081	37.0537	86.4897	20.0464
200	45.7994	20.5936	30.4847	38.3725	68.9974	30.1268	68.0569	14.2978
210	36.1562	10.773	22.6214	30.6556	62.5791	30.9552	53.7301	8.65228
220	32.6026	10.4621	21.1971	25.2186	58.7155	24.9414	35.1601	13.3618
230	27.6304	6.96259	20.6309	27.6645	52.3029	30.0033	33.3748	5.06415
240	25.1987	10.0834	19.7921	24.463	55.9554	19.3533	27.0837	5.4276
250	19.2136	4.14842	15.6724	25.1517	56.9943	23.0885	30.3632	3.68271
260	21.5608	5.76413	15.1873	24.5282	41.8562	21.4848	22.9371	7.91111
270	12.9899	3.77481	20.7682	23.91	40.9702	21.6014	30.2665	7.43687
280	16.0853	-0.948438	19.7032	28.6049	44.1707	15.3547	28.9085	10.0995
290	11.8733	0.40155	19.8491	23.7086	50.6897	17.1968	24.6183	11.2517
300	15.4282	0.210659	20.0953	26.5013	46.1535	10.4743	22.9842	10.1802
310
320
330
340
350
360
370
380
390
400
410
420
430
440
450
460
470
480
490
500
510
520
530
540
550
560
570
580
590
600
610
620
630

## Sheet: PHX444_Control
time from nebd (s)	embryo_1	embryo_2	embryo_3	embryo_4	embryo_5	embryo_6	embryo_7	embryo_8	embryo_9	embryo_10	embryo_11	embryo_12	embryo_13	embryo_14	embryo_15
0	186.276	68.5214	93.1261	54.9753	166.408	149.735
10	197.962	130.808	105.769	80.523	169.173	165.597
20	177.991	159.566	146.515	135.387	274.459	225.988
30	234.087	195.145	167.914	162.005	254	251.674
40	266.037	218.135	165.887	168.73	237.783	238.381
50	298.898	205.596	199.449	176.375	212.354	257.151
60	261.941	241.421	219.738	169.231	246.818	245.055
70	312.205	221.007	252.384	198.803	247.331	266.111
80	304.082	232.211	247.571	177.72	239.125	255.972
90	304.971	224.069	219.824	212.235	270.794	224.672
100	340.065	207.097	203.537	162.161	248.418	211.98
110	276.95	180.899	193.486	243.905	244.049	200.638
120	225.765	184.003	155.144	160.435	164.852	168.774
130	172.628	174.032	162.855	153.309	141.846	133.697
140	265.123	130.406	145.577	132.112	143.664	129.875
150	123.078	169.499	67.8631	68.1844	102.068	98.6055
160	124.547	67.3418	73.0626	56.4394	84.8645	68.3572
170	72.0387	60.1509	42.8471	41.0862	50.411	46.0328
180	55.1912	35.0511	26.801	29.7818	49.5841	31.1079
190	47.2163	39.0657	17.1649	27.3093	45.6643	30.8924
200	41.369	26.1051	15.2698	26.9719	41.7419	16.1962
210	39.9746	19.5865	10.3637	20.9525	38.0883	19.3116
220	36.7244	17.2693	7.9856	13.2032	30.2275	15.7616
230	29.9133	10.0324	5.88005	18.0246	23.71	1.24046
240	30.374	11.0449	5.48607	10.8285	12.9969	0.452202
250	23.1645	3.08343	7.28087	8.68808	8.5447	-1.44408
260	23.741	1.47011	2.84484	6.22177	8.99296	-6.27287
270	14.1665	-1.35754	0.607484	4.19472	5.52298	-8.83971
280	17.3851	-4.20716	0.775223	1.6643	4.71078	-8.33713
290	16.2953	-5.2032	-0.586648	0.826025	5.15541	-16.0536
300	16.933	-3.33171		0.478778	3.90134	-12.5317
310
320
330
340
350
360
370
380
390
400
410
420
430
440
450
460
470
480
490
500
510
520
530
540
550
560
570
580
590
600
610
620
630

## Sheet: PHX444_bub-1
time from nebd (s)	embryo_1	embryo_2	embryo_3	embryo_4	embryo_5	embryo_6	embryo_7	embryo_8	embryo_9	embryo_10	embryo_11	embryo_12	embryo_13	embryo_14	embryo_15
0	118.851	42.9934	66.3448	77.2018	88.0717	82.6878	220.115	107.248
10	131.675	58.5472	60.3144	93.0101	101.474	112.567	228.29	187.379
20	129.466	98.8749	83.0164	106.61	88.8135	120.498	251.908	187.279
30	126.367	96.8533	82.7043	131.105	102.21	110.112	258.715	231.545
40	169.466	105.941	128.435	163.583	162.992	159.891	271.267	283.821
50	148.982	131.923	114.323	167.557	181.316	164.763	293.361	315.771
60	153.901	161.553	115.859	162.214	189.105	128.106	302.428	243.265
70	142.406	159.006	129.702	132.3	174.756	122.583	275.19	221.721
80	150.637	166.572	146.919	103.109	156.607	91.5208	228.953	214.796
90	130.483	145.675	163.529	101.886	134.24	76.878	162.483	177.118
100	117.045	146.183	156.702	84.4948	117.494	55.6134	93.7376	151.686
110	127.162	132.183	132.123	77.0548	61.128	50.16	74.0053	145.204
120	104.668	102.497	132.297	61.6165	47.6345	42.908	59.9985	117.29
130	83.0135	82.9096	130.831	53.8516	31.8558	38.0159	48.0218	78.2817
140	54.2154	74.3706	102.805	50.4422	24.0494	30.0206	38.3112	69.1178
150	45.6998	58.0626	92.3759	43.6014	24.2036	24.6222	36.9028	57.7487
160	40.203	53.5603	65.7557	48.2434	17.0063	24.0155	32.8526	48.1202
170	40.8327	48.0074	53.0623	43.3534	19.408	20.1815	28.3427	47.6255
180	36.8188	40.9694	53.2336	43.1441	13.1507	20.4121	26.4443	32.822
190	33.4487	40.8331	31.8232	35.9736	15.0424	16.3895	26.7357	36.9686
200	31.1655	26.5999	37.3732	34.9893	13.8743	19.6352	28.7539	32.558
210	30.5144	29.6547	33.5218	22.0219	10.9971	16.9216	31.0563	30.4235
220	26.111	30.3671	32.6403	29.0776	6.03903	21.4735	34.9905	28.5531
230	29.8281	28.3591	32.6201	30.7398	5.46626	14.5832	31.1623	28.2139
240	30.4627	33.4222	30.7753	31.9187	10.0619	19.2561	33.1516	24.3435
250	26.0994	37.1372	37.312	30.4845	1.4414	13.8571	35.9372	31.7871
260	17.5117	33.7581	33.8895	26.6483	5.13566	10.6684	32.8521	25.281
270	16.0115	35.7571	35.4086	31.0945	-4.47188	9.38273	33.1111	30.5397
280	12.8666	26.8369	34.0367	27.4819	-4.14947	6.75822	31.7615	21.6485
290	9.95998	24.4639	32.6905	19.8827	-1.37928	6.12797	22.7051	22.8594
300	10.3852	20.0183	32.5168	21.938	-4.40819	5.9821	26.9531	22.2685
310
320
330
340
350
360
370
380
390
400
410
420
430
440
450
460
470
480
490
500
510
520
530
540
550
560
570
580
590
600
610
620
630

## Sheet: JDU146_Control
time from nebd (s)	embryo_1	embryo_2	embryo_3	embryo_4	embryo_5	embryo_6	embryo_7	embryo_8	embryo_9	embryo_10	embryo_11	embryo_12	embryo_13	embryo_14	embryo_15
0	-5.16051	-18.7434	-11.3962	-10.2439	-11.7544	-9.10096	-13.6004	-11.0171	-19.2278	12.6141	-4.76304	7.0613
10	15.5287	-0.770629	-0.71273	-8.06016	-6.40986	2.32725	-1.97001	5.50753	-6.57894	37.0347	6.98257	27.1501
20	39.9861	14.1343	21.424	-0.889758	1.15806	24.1597	12.279	30.2759	5.12472	69.3393	21.8953	67.6289
30	74.2589	44.2653	71.0318	15.0118	13.5768	35.9117	31.9039	59.6761	18.3676	105.4	43.3801	105.184
40	117.206	92.3918	115.736	46.271	42.0178	89.6558	63.8811	108.237	46.631	135.56	75.0907	180.67
50	218.818	172.048	164.847	94.5487	86.2432	118.987	110.655	129.692	83.282	152.914	160.748	208.782
60	279.045	219.44	212.086	176.847	122.411	198.536	130.334	174.36	130.732	196.095	209.082	219.229
70	286.945	248.498	244.442	245.164	177.534	231.618	185.931	225.702	185.588	215.806	219.353	176.974
80	344.584	258.978	251.963	228.044	204.37	291.444	252.886	247.322	203.107	255.233	251.785	41.2394
90	403.063	267.916	275.419	258.534	229.802	289.453	210.058	289.092	178.906	261.148	251.975	34.5625
100	434.837	291.577	295.609	330.256	258.217	347.38	220.878	287.709	213.48	224.936	258.23	16.1488
110	388.973	334.737	285.945	300.935	325.362	331.07	266.507	272.321	213.126	201.561	298.937	262.686
120	386.553	267.135	270.3	368.297	284.724	274.951	243.872	262.365	235.28	210.478	259.092	244.24
130	313.75	285.471	310.62	270.919	309.943	324.549	206.604	218.958	212.411	159.71	232.734	235.37
140	310.885	246.483	253.493	320.111	258.999	265.039	188.039	184.999	210.913	168.761	178.508	231.845
150	285.331	278.739	310.261	239.222	267.243	318.918	177.238	182.143	186.141	94.2878	185.784	171.886
160	229.558	200.444	215.807	247.115	215.637	218.008	126.673	132.309	173.537	70.7285	137.97	119.305
170	134.065	108.312	191.738	102.797	132.424	158.636	126.861	72.8847	115.88	42.4839	120.204	69.0996
180	69.9503	78.5977	100.462	84.6854	91.9837	96.0666	80.6298	70.7299	62.8757	25.6494	47.6319	42.83
190	41.5341	57.1077	63.1677	44.8216	58.3964	54.7664	38.5978	32.7088	50.0733	19.6341	42.4756	23.0109
200	26.2653	17.7508	33.2996	19.2048	27.5487	31.4327	21.4801	23.0336	16.7406	14.7076	15.6954	18.4588
210	14.8628	12.1255	19.505	7.03399	21.4654	18.6087	8.97303	13.3354	12.7578	10.0148	11.4154	12.1045
220	9.4543	1.21718	12.2275	2.90214	14.7063	12.267	4.58356	8.91961	4.41089	9.2826	5.24306	8.84728
230	5.52232	-0.762058	5.82315	-1.00131	9.85452	10.7396	1.40653	6.9777	2.87599	7.17	1.49282	2.64612
240	4.86036	-2.42832	5.61238	-3.50337	7.61651	6.92947	-0.554221	6.60284	-1.58034	5.97017	1.51043	3.48759
250	-1.38645	-5.96843	1.82878	-4.72096	4.47584	5.44364	-1.19552	5.29307	-1.53096	4.09988	-1.08472	-1.38608
260	-4.47701	-8.42255	-0.32967	-9.19716	3.54718	1.96828	-1.74567	4.98845	-4.94309	-0.156182	-3.79863	-6.03564
270	-5.34386	-8.39348	-4.73404	-9.59111	0.518487	-0.0374853	-1.5534	0.759297	-7.84566	-0.987179	-5.12648	-10.4812
280	-7.22609	-9.41522	-10.3414	-10.4974	-1.23107	-3.04967	-2.73392	2.06509	-8.67247	0.0868862	-6.16812	-11.5902
290	-9.56862	-10.1032	-13.9119	-6.02185	-0.956552	-3.6414	-4.27281	0.385411	-13.1523	-0.0511932	-7.28932	-12.0416
300
310
320
330
340
350
360
370
380
390
400
410
420
430
440
450
460
470
480
490
500
510
520
530
540
550
560
570
580
590
600
610
620
630

## Sheet: JDU146_bub-1
time from nebd (s)	embryo_1	embryo_2	embryo_3	embryo_4	embryo_5	embryo_6	embryo_7	embryo_8	embryo_9	embryo_10	embryo_11	embryo_12	embryo_13	embryo_14	embryo_15
0	-4.76574	-1.59216	-6.44405	8.09975	5.4	-5.57063	1.1545	-4.41727	-15.1555	4.90516	-0.0459234
10	2.47496	3.6266	6.19291	19.9189	9.23579	9.99669	21.5927	8.91238	0.243929	16.833	1.56639
20	8.15643	10.0152	22.0535	69.3209	22.3671	24.6493	39.8353	29.725	19.8982	28.0374	1.38133
30	21.371	23.9003	34.7758	113.699	44.4044	34.0422	70.2333	50.1464	42.7949	43.7797	7.65668
40	39.781	43.5354	58.6784	169.674	68.3954	46.607	107.71	68.4916	87.3563	109.452	14.8132
50	39.6357	59.2753	121.319	235.469	100.976	85.152	95.5078	94.8272	112.376	112.406	31.5285
60	84.5391	66.7734	175.535	267.282	131.625	101.579	134.547	170.162	168.972	173.881	43.9866
70	92.5907	118.196	182.111	299.026	147.788	133.55	143.635	193.585	234.617	205.01	37.8353
80	143.071	180.998	182.626	299.799	149.772	165.916	136.499	218.644	260.059	185.549	81.416
90	177.87	208.693	154.756	221.151	152.018	166.772	131.288	210.483	285.77	153.07	105.286
100	180.312	230.25	121.737	173.351	123.892	194.431	119.265	202.397	218.726	110.367	146.239
110	177.902	180.093	100.558	125.017	116.545	182.126	103.023	203.129	180.483	85.5425	118.598
120	171.586	141.899	76.1158	99.8344	81.6232	137.275	80.0031	179.234	137.366	50.6484	100.45
130	111.44	125.065	67.9462	64.0835	53.5165	136.168	66.8614	141.138	106.62	19.3459	82.7995
140	86.3435	85.3383	44.8647	44.9504	44.0193	84.5349	40.5042	88.6996	62.8915	0	61.9458
150	61.8956	64.0463	32.0886	33.3887	40.2931	73.0772	29.569	55.6549	51.8762	17.8757	45.2033
160	47.8055	50.8925	20.1554	17.5846	30.9437	55.7852	20.8724	36.8603	41.0595	17.6214	32.48
170	31.3847	35.5207	14.1649	15.608	22.3537	34.9335	14.7547	23.3217	23.9402	14.6716	21.8342
180	26.4353	24.4272	11.405	11.4935	20.925	24.1782	15.2176	11.9272	19.9925	10.8086	18.8494
190	17.6492	21.5561	6.95725	7.21011	14.5237	14.86	10.2977	8.38914	15.0522	9.21744	13.5692
200	13.8496	14.5342	1.16578	3.66553	12.226	9.70276	14.4573	5.55351	13.5862	7.45413	8.38768
210	11.7198	13.1384	-2.92978	4.39988	8.75747	7.50308	12.3734	3.99345	9.30493	7.04479	8.56421
220	8.57612	10.1707	-3.57984	1.68965	6.7906	3.18968	14.6218	2.54421	7.67168	7.71598	9.22753
230	9.34934	10.9905	-4.88546	1.61824	7.97265	1.91311	12.1357	0.972989	8.43252	5.34597	5.0225
240	6.95253	6.34605	-5.44175	0.712574	7.43646	2.01236	14.4956	1.38391	5.23656	1.32408	6.34615
250	7.79069	4.22339	-6.9269	0.119642	9.39655	1.87501	14.2811	0.115213	4.83671	-0.510128	5.13473
260	7.86203	5.07216	-6.26047	3.14889	9.04305	-0.0220717	13.3989	0.436767	2.56406	1.49731	4.07984
270	7.46359	3.21584	-8.80331	3.63273	9.39782	0.182851	15.9762	-2.10534	2.24774	0.19975	4.86497
280	7.69709	4.50241	-8.43915	2.72961	6.39468	-1.5306	11.3821	-3.89719	2.92352	-0.141679	4.99899
290	9.95059	3.3896	-7.23943	-0.119003	4.15284	-1.68833	11.6513	-2.02528	2.64383	-0.355095	1.45685
300	10.1497	0.538394	-9.95184	0.23656	9.39264	-3.14013	10.5654	-2.33238	2.53822	0.497044	2.85818
310	9.16149	1.53931	-8.20639	0.711078	5.76636	-1.82807	7.99482	-3.57436	1.79035	-1.31536	3.68228
320	9.36863	0.0450438	-4.98222	0.622774	6.1972	-3.54531	6.28175	-1.97644	-2.21954	-1.17843	2.69067
330	11.2367	-1.08586	-6.21156	-1.28204	6.64745	-4.72441	8.72661	-2.6182	-4.61113	-3.91468	2.39526
340	5.52376	-2.26965	-8.62166	0.230421	4.35966	-3.81011	7.93275	-4.0963	-6.00531	-3.36365	-0.875497
350	6.32196	-0.926191	-9.84415	-1.06966	3.68581	-4.95831	4.44842	-4.16665	-5.65048	-4.07552	-0.990073
360	6.81277	-3.71062	-8.85195	-1.64979	3.18025	-5.71227	5.84108	-3.03673	-6.91447	-0.484079	-1.35594
370
380
390
400
410
420
430
440
450
460
470
480
490
500
510
520
530
540
550
560
570
580
590
600
610
620
630
