# Supplementary material for: BUB-1 promotes amphitelic chromosome biorientation via multiple activities at the kinetochore
Source: eLife journal article supplement (doi:10.7554/elife.40690), 2018-12-14
Supplement: supp [file elife-40690-supp-v1.zip › elife_poa_e40690_Figure_1_figure_supplement_1_source_data_2.xlsx]

## Sheet: Control
time from nebd (s)	embryo_1	embryo_2	embryo_3	embryo_4	embryo_5	embryo_6	embryo_7	embryo_8	embryo_9	embryo_10	embryo_11	embryo_12	embryo_13	embryo_14	embryo_15	embryo_16	embryo_17	embryo_18	embryo_19	embryo_20
0	4.31073	26.0678	19.6551	28.315	29.7321	7.48154	24.6571	13.0597	12.6491	21.5351	13.0872	64.381	28.0317	13.711	20.9412	23.7087
10	8.13922	24.4231	18.9325	27.609	37.1513	8.88407	22.9984	16.7115	15.5712	26.3385	9.43142	70.6823	22.8539	13.824	17.2468	19.1644
20	3.80712	26.4043	20.6857	32.0642	35.7701	10.3557	18.1397	13.7129	13.3001	31.7251	15.1535	65.6743	27.0207	15.3195	12.4153	25.457
30	4.85872	41.1062	27.2145	35.3073	36.963	9.30508	18.8799	27.8982	15.6722	36.2971	13.4266	62.4161	27.6469	24.2283	6.20122	24.3067
40	3.39638	29.5729	36.181	33.8327	41.5795	10.2037	17.1105	25.8724	20.8743	37.6847	13.7711	58.4376	26.1393	22.603	8.7727	22.5707
50	13.5176	34.3705	36.3035	35.2227	36.1715	9.13444	20.4838	25.2729	21.7294	29.6675	17.1666	60.2539	22.1743	19.6075	9.15081	28.6704
60	27.4147	34.6594	34.6232	35.9649	36.0731	13.5359	23.3035	25.3099	23.3633	37.9634	17.1823	50.092	23.9351	23.0833	11.3957	29.0721
70	33.2529	36.5505	32.7695	31.8891	45.1373	14.4774	19.509	28.4307	22.6912	29.9562	18.2633	54.7444	23.6591	22.9484	18.2798	36.9433
80	35.5048	40.2465	38.3321	29.0993	51.4569	11.3208	22.1545	30.1914	22.8049	31.8742	21.9703	52.6874	24.5055	23.6419	20.499	33.7729
90	33.2488	36.5121	35.5025	29.4115	44.9491	13.4163	24.2242	28.8509	19.6234	36.1433	18.096	53.2343	23.2967	22.6346	19.8167	33.3813
100	30.0701	40.3213	38.2407	30.0813	46.9358	11.9632	21.2708	23.1204	19.2087	34.1225	21.7825	54.1651	23.0093	20.7544	19.1237	27.3527
110	33.0219	36.0249	41.6503	31.6112	44.5533	10.7791	24.6418	24.733	17.3416	26.9313	23.5175	48.6177	21.0891	17.738	22.8988	32.029
120	31.361	37.879	36.246	27.2874	41.9813	11.9119	25.0843	26.9008	14.68	23.5024	22.7377	47.4695	19.2068	15.9499	18.5516	34.0463
130	40.777	40.4166	38.9451	21.3614	37.7422	11.8308	22.3656	23.5426	14.0355	10.2684	21.5503	48.0266	20.175	12.1115	20.1518	30.7814
140	35.1417	32.3902	21.8294	9.41527	37.8325	12.3367	18.6904	13.9093	15.5853	7.13842	19.2725	45.3622	17.4952	7.13142	14.6422	32.2374
150	36.5743	20.3435	11.059	7.09909	50.1927	14.9931	14.3714	7.17407	10.604	6.0283	12.9354	47.8579	11.7082	-0.298509	19.3453	31.6567
160	16.2125	11.2983	7.92621	7.5618	43.3637	15.0227	6.51643	6.52268	7.23791	4.18496	11.0399	51.5547	5.51553	4.05467	19.7575	23.8886
170	10.6537	11.1036	10.3354	3.07677	35.8002	11.6819	4.7315	1.9877	2.68213	5.8023	3.85328	51.7945	5.14513	1.99613	12.808	11.8446
180	5.25174	6.85621	4.79456	7.04952	34.4094	8.71291	5.68666	1.77167	3.29524	7.35699	3.78052	50.3329	3.92759	2.87124	8.78844	4.35303
190	6.14024	12.5246	12.1093	4.64956	30.0673	4.14682	1.77583	0.606355	3.37157	1.76882	1.94272	24.914	1.62022	2.37162	1.82871	5.60282
200	7.13232	4.23049	4.76031	7.60289	26.6839	4.10123	3.7528	3.46232	0.811835	3.76637	0.110458	14.9111	2.60428	1.90963	2.75163	6.53141
210	6.7225	10.005	6.8418	7.35323	11.9748	3.64829	1.64005	2.69522	0.277013	4.67619	1.3982	12.7294	2.41353	2.59511	2.01623	2.97595
220	5.24525	5.91661	9.3068	8.8965	6.4436	3.39942	3.51236	5.12968	0.998065	6.54062	2.7522	9.27231	3.7183	5.88146	4.25031	5.09305
230	5.65076	7.17568	6.33336	14.9074	7.80143	0.968936	2.83297	5.35766	5.60407	12.0312	1.13009	11.526	2.92515	8.5017	2.09344	3.0086
240	7.47356	10.2251	11.0574	14.9289	8.7587	2.80933	2.48296	6.5554	3.48542	13.5698	1.36893	3.63901	1.07456	9.71355	5.22689	2.04919
250	7.89244	17.1703	16.4822	16.5682	2.42232	3.21834	5.71141	9.87472	3.48682		1.13556	2.44738	2.76248	11.7695	3.55933	5.12868
260
270
280
290
300
310
320
330
340
350
360
370
380
390

## Sheet: bub-1
time from nebd (s)	embryo_1	embryo_2	embryo_3	embryo_4	embryo_5	embryo_6	embryo_7	embryo_8	embryo_9	embryo_10	embryo_11	embryo_12	embryo_13	embryo_14	embryo_15	embryo_16	embryo_17	embryo_18	embryo_19	embryo_20
0	5.04856	9.62127	13.9643	6.49044	17.3087	19.2211	17.4829	13.8935	2.02261	8.08713	22.5977	40.8027
10	4.56116	7.27836	14.7832	8.55493	17.5182	19.6011	13.1308	16.9009	3.86864	12.0869	24.2588	39.2621
20	3.97993	6.09746	15.3128	8.29258	12.994	20.4576	10.8285	14.4366	3.90477	13.8037	19.6164	39.0031
30	5.65206	4.69774	13.2518	7.59523	12.2184	21.8471	12.9094	13.6793	4.15245	12.7909	19.6635	43.5818
40	6.38103	5.16287	17.7798	10.9543	14.4795	19.2145	18.4938	9.75043	4.07539	13.6734	20.4146	38.5612
50	7.89838	5.04958	18.5041	11.5385	15.8366	16.2119	20.3638	13.4164	4.58038	14.9228	19.3276	39.1056
60	9.39034	14.1011	16.8108	11.0004	13.9084	16.4582	17.3802	10.9934	7.68589	16.229	17.7509	35.4672
70	7.92874	13.789	13.5544	12.0754	13.3736	13.8317	19.7687	10.708	8.70917	14.9523	14.9282	35.3867
80	10.3223	12.2837	11.7456	14.6547	15.5422	16.6501	19.759	8.78239	11.7323	12.571	16.3233	34.891
90	9.3739	12.5582	14.3674	14.3395	15.3936	18.8586	20.9514	9.54965	11.4718	10.9781	14.6449	35.3532
100	11.8851	18.5343	11.8136	16.0269	12.6324	21.2441	17.5409	10.7513	12.2875	11.9012	18.7492	42.0773
110	9.8924	18.612	11.9321	16.6575	12.1053	23.1365	20.4231	8.26358	10.8727	12.6101	17.2294	40.888
120	10.4424	17.7391	11.0641	13.6401	12.0623	22.9984	18.3065	11.4282	12.243	14.2057	18.3346	38.4111
130	10.0864	13.6514	10.1177	13.2621	10.7174	21.7376	18.6977	9.48877	11.221	18.0244	22.3154	32.106
140	11.2363	17.3772	12.1456	14.8482	18.6014	26.1083	16.3126	10.1347	11.1006	16.5898	17.8904	31.309
150	10.417	16.2552	7.95994	13.0667	12.9434	26.5489	18.3804	11.1467	12.6806	16.9136	12.1686	27.1969
160	8.63979	17.4131	13.0785	15.1579	16.6258	31.3117	16.8747	11.2011	8.7474	14.9974	12.6924	24.1357
170	12.4147	16.7574	9.44691	12.8182	16.2649	25.5715	13.5208	10.9848	8.85237	15.5256	12.706	25.6987
180	10.6475	18.0541	11.1456	13.6384	12.1995	26.9245	12.5953	11.173	8.24934	18.559	13.4531	25.7574
190	11.527	20.4632	10.9983	14.4369	14.0798	24.777	11.5384	9.39274	8.08037	16.6525	13.4346	26.2501
200	10.8269	20.0173	12.8932	17.8534	14.2971	29.9784	11.639	10.9532	6.6653	14.6796	11.0689	25.3686
210	11.8826	18.8644	9.42586	14.2132	13.9665	23.7641	11.619	6.70841	8.77023	18.7106	12.3569	29.2951
220	9.42651	15.6116	12.3506	14.3067	11.386	27.0464	8.00404	7.37851	4.73776	17.2835	13.8352	21.7801
230	14.7334	16.9474	15.3469	15.6311	11.1754	14.211	14.5115	1.18199	8.53502	12.3244	12.9572	29.3665
240	11.637	23.261	12.86	15.4265	9.47209	9.26452	11.9038	1.54068	3.43154	18.9117	11.8685	31.9713
250	13.1609	18.0952	12.5385	16.2306	12.5569	3.07803	10.0589	1.31416	8.96656	14.3934	12.5142	31.7143
260	13.53	20.4845	10.4292	16.0817	8.18479	3.59039	6.53226	0.977494	5.84013	22.4114	18.272	42.329
270	11.1745	12.0503	10.9203	20.4041	6.02317	0.27808	4.49566	-0.00692654	10.3945	23.3651	13.177	37.9465
280	9.70105	10.0586	7.58004	16.1297	3.53009	1.43253	2.60106	-0.335328	2.1829	18.0687	15.7808	25.2915
290	12.041	5.21907	6.4031	18.1692	1.06798	-0.947682	0.801075	0.566949	4.49142	10.4005	12.9891	26.5512
300	9.44667	4.02082	1.3907	15.2016	1.60881	1.78634	0.734049	-1.0106	0.835653	10.1044	16.2558	19.08
310	9.26079	3.55662	0.980014	4.37939	-0.238833	3.00733	3.1782	0.577446	2.64833	13.9037	10.4771	6.18399
320	11.4199	0.317796	-0.445921	3.99197	-0.0600655	1.94393	0.417426	4.71131	1.90768	15.7345	13.029	6.15403
330	10.4599	2.79243	0.4754	1.92549	-0.279341	5.51175	1.26371	3.16671	1.29338	16.5994	12.0152	2.42401
340	5.09589	0.949755	0.727334	1.27312	1.90457	3.25173	1.1223	3.2658	1.39803	9.91063	8.07121	2.72624
350	2.67958	1.31865	2.19792	1.29386	0.320203	3.92931	2.77002	1.97263	3.42731	2.1782	14.5028	3.47484
360	2.05107	1.05483	0.378848	1.08848	3.44512	5.08605	3.27751	4.55016	2.99024	2.49825	17.9445	5.49652
370	2.55537	0.430879	0.800705	0.29594	3.36852		1.43205	2.39058	0.161218	0.699241	12.4069	5.36474
380	0.670488	0.0947819	2.66671	0.633019	5.22628			2.3175	0.284565	2.8573	11.469	6.13626
390	0.185027	1.58987	1.74859	1.90051	5.09101			2.16395		1.28297	9.24556	5.44951

## Sheet: hcp-12
time from nebd (s)	embryo_1	embryo_2	embryo_3	embryo_4	embryo_5	embryo_6	embryo_7	embryo_8	embryo_9	embryo_10	embryo_11	embryo_12	embryo_13	embryo_14	embryo_15	embryo_16	embryo_17	embryo_18	embryo_19	embryo_20
0	16.2743	18.2871	49.4055	62.1586	32.5829	52.4053	9.43468	19.9706	28.8453	9.55056	25.7579	10.6411	22.1989	13.2514	14.3225	45.7609	36.7674
10	16.0712	17.6074	42.3017	47.4266	32.8548	55.9503	10.3713	14.0297	26.0318	4.06853	24.3791	11.5791	27.0311	11.2421	15.4658	37.5989	45.1758
20	13.2043	16.7764	40.4265	47.5346	23.8861	58.9207	11.3156	18.7972	28.2325	6.41674	29.8154	8.12626	23.6362	11.5079	18.9515	33.5715	41.3854
30	15.8487	10.3424	31.3005	56.3525	23.669	58.0856	9.91673	12.1733	30.4872	9.55291	37.25	9.44694	20.2489	16.0975	14.3977	28.9051	42.7188
40	15.5211	17.9384	28.4164	57.8365	28.1745	50.9753	12.3542	16.1462	27.158	8.82063	30.0301	7.68924	18.0681	16.1872	10.6501	28.183	40.7981
50	15.0319	15.9383	35.5911	52.8535	23.0092	41.6764	16.076	16.4608	25.8406	9.19855	32.2834	12.0978	17.6186	18.7118	12.1057	32.2457	37.837
60	10.2223	15.583	28.4366	59.6133	24.1133	52.5907	18.6742	14.6883	34.3201	10.7716	44.4984	16.9681	19.2208	16.5465	10.0112	36.0418	36.7753
70	11.4042	13.8283	28.4031	57.9448	21.7745	50.0652	16.9712	17.9344	29.0716	9.28152	35.2981	18.0705	15.7945	15.8425	15.6977	29.3065	29.9322
80	12.0728	15.2183	25.8753	65.5239	17.8362	52.5679	12.9104	17.5718	31.7364	9.2319	39.4557	25.2174	16.5013	11.6029	14.3425	38.3581	31.691
90	14.0569	25.7918	26.878	48.3128	13.9732	61.346	16.1955	13.8908	35.1289	9.23557	38.0714	22.4355	13.2055	15.0182	14.3364	27.573	33.16
100	6.91467	20.563	30.0932	39.8549	25.3918	46.0959	14.0196	16.0323	34.1644	11.4605	40.2455	23.1807	11.4278	10.5017	15.8679	25.9014	20.3784
110	10.838	15.6184	26.0474	34.5737	23.9604	50.3623	17.5226	12.3473	32.4858	11.0853	41.1271	21.6992	11.8177	11.7478	15.9894	34.1834	20.9929
120	13.1661	16.6795	27.4585	35.1241	30.4936	60.7576	16.8494	15.0451	30.7358	10.9931	45.7841	18.4741	13.404	11.2093	15.9598	29.6504	24.7096
130	9.80031	14.6627	25.0435	29.0505	20.8546	67.7479	21.123	13.7884	35.3177	15.1606	43.1364	17.8026	10.5051	9.19086	13.857	31.9756	21.0277
140	8.78656	12.1878	22.0982	30.7618	23.298	63.0144	23.4234	15.1189	37.3506	10.4181	41.2836	13.015	9.71451	8.50375	14.6767	36.3768	23.2959
150	7.98919	12.5868	25.4766	23.9729	23.6905	62.0885	24.877	14.4209	34.2092	10.5991	36.6825	13.5113	11.4998	4.25577	16.6716	32.7311	16.4757
160	11.074	15.9339	26.3632	34.3972	18.1928	55.6975	20.0874	12.0203	35.4518	4.95745	35.9137	15.2207	13.1296	7.35923	15.3218	30.3233	16.6179
170	10.7316	17.8222	27.3093	28.1576	24.4482	50.5556	20.0744	14.5309	33.252	8.09287	39.0363	12.4238	12.1094	8.18247	19.0896	27.1257	14.5545
180	8.91987	14.4173	23.5211	32.1028	21.3872	52.959	23.8107	14.2698	35.7469	3.93828	28.0119	12.9067	12.8524	8.70233	17.1091	33.3548	18.3162
190	13.9131	15.4424	20.4867	39.0834	21.9752	46.503	23.5272	12.8809	36.3728	5.76445	28.5377	15.7855	15.1472	11.9655	20.2132	29.9303	18.7632
200	10.4524	14.3549	20.7802	27.2313	25.0184	46.6335	19.3399	14.7237	35.4477	6.06995	36.7205	14.0462	13.2636	13.3311	20.7126	27.3239	20.5064
210	9.73479	16.1626	23.5926	34.7629	24.4994	34.1183	14.6662	9.22222	27.7297	4.69804	25.5672	17.4242	9.9707	10.9888	18.1154	23.929	13.9123
220	11.0361	15.6757	21.4522	26.583	22.5273	34.1341	14.8082	11.6574	27.1593	7.73118	31.7591	16.4429	9.98611	12.388	18.8968	24.5918	18.3219
230	10.058	9.69923	20.8617	23.4904	20.4167	35.133	13.8494	18.106	27.0911	4.19272	26.6084	16.0287	12.49	10.1711	19.4613	48.2399	26.1767
240	10.9341	10.9946	20.3889	21.4329	20.1672	34.9869	6.35779	11.2655	25.2467	2.70066	26.6484	17.4249	14.9552	11.29	19.5563	27.0696	27.547
250	8.61101	5.25433	18.6611	12.2823	22.4326	34.0014	4.07749	12.9006	19.8033	2.7133	14.4676	16.5213	8.62756	9.65821	14.0403	34.236	24.8372
260	9.84721	3.92305	15.4765	7.76264	12.5264	39.9305	1.84436	4.73593	10.8856		17.8291	16.7195	4.32249	9.91862	15.5234	27.7314	22.6502
270	8.24602	3.2009	33.5274	4.82798	10.3359	29.9228	1.33522	3.95226	5.98566		10.9657	15.2752	1.80232	10.7152	16.8886	28.7152	26.114
280	2.35801	1.44454	16.1199	3.15402	9.62296	23.7214	2.76892	1.44712	2.1375		0.912411	13.3476	-0.584292	8.6187	16.4911	19.8616	21.7979
290	0.749588	1.14363	19.2883	4.52417	4.07303	7.43346	1.58706	-0.313663	3.29297		-0.608954	6.37274	0.132415	5.35875	18.5813	16.708	17.3429
300		1.02104	10.8529	1.26493	3.02037	2.714		1.92			2.40365	3.58599	1.52595	1.02629	19.2752	7.0714	14.6025
310			3.07669	3.39217	3.80158	4.53867		1.52646				0.873624			11.9001	4.18375	10.9476
320			3.81139	0.909117	2.28004	1.01838		-1.07099				-1.23304			15.9	4.30557	4.59886
330				2.31131	0.701389	1.91567		1.1812				0.409089			8.87137	4.46633	8.5158
340				2.61579	1.61825	0.457713		1.16829				0.593296			2.0447	3.90406	11.9614
350				2.32945		1.98307						0.344545			2.98949	4.73081	10.8418
360				5.54639								1.99972			-0.170306	2.51608	15.9507
370				3.38278								0.929164			0.991126	2.54748	12.0561
380				3.89676								1.86896				0.797338	9.73309
390				2.46289												3.01769	5.00543
				3.78154												4.52344	2.91304
																6.8883
																7.13833
																8.80872
																9.5899
																6.5526

## Sheet: cls-2
time from nebd (s)	embryo_1	embryo_2	embryo_3	embryo_4	embryo_5	embryo_6	embryo_7	embryo_8	embryo_9	embryo_10	embryo_11	embryo_12	embryo_13	embryo_14	embryo_15	embryo_16	embryo_17	embryo_18	embryo_19	embryo_20
0	27.0653	18.8742	18.1232	20.2544	17.2818	13.8717	13.3999	21.8086	32.9266
10	21.9246	20.4663	17.703	7.81026	10.202	13.651	8.72236	20.7538	31.9807
20	23.1471	19.1967	13.2963	12.4601	14.2982	11.756	15.6165	26.0132	43.5134
30	21.4221	14.0926	18.3978	8.20711	15.9994	12.1774	16.5924	25.6204	41.0778
40	21.6116	17.9494	14.6855	11.3785	13.6598	12.2184	16.1559	23.3038	37.2186
50	21.1419	16.2343	15.9911	10.3207	15.3831	8.74865	16.6927	15.8303	33.0159
60	19.151	25.1732	16.2188	11.5765	11.8937	14.1067	20.2437	21.2186	30.0505
70	20.5705	22.9495	19.0022	10.7104	14.0085	16.0865	20.329	16.6432	30.0305
80	14.5089	20.1658	18.112	16.141	12.856	9.3469	18.6209	24.8747	25.4383
90	12.7594	20.76	12.5975	9.59909	16.2842	14.0386	19.6253	19.3087	26.5439
100	23.2846	18.7635	10.3531	15.953	18.1371	13.7009	20.0246	28.6455	25.8708
110	22.0082	21.1029	11.3369	15.2893	15.1598	14.6882	18.2847	31.3801	24.3453
120	15.502	20.672	10.9339	13.8156	12.0828	12.3439	19.814	27.3411	23.9339
130	18.4191	13.7426	8.62797	16.825	10.0501	10.0235	18.0637	38.3225	22.2489
140	18.6123	19.511	12.3509	14.489	8.33028	12.7739	23.0946	30.4433	26.0882
150	16.5901	17.7852	8.8406	16.6136	9.28791	13.0194	19.3548	30.0206	24.5792
160	18.8002	15.3012	8.33986	8.25732	10.6877	15.4932	17.5297	35.6789	23.277
170	18.4487	6.62643	9.77458	16.5987	7.39754	12.3636	19.7438	20.8968	23.0964
180	16.8142	1.87791	9.392	7.9921	5.36652	8.28337	17.4442	25.1956	24.1722
190	12.5973	2.69179	5.6259	6.66172	3.59505	6.57836	14.1601	10.5056	25.9307
200	10.6274	1.07542	6.91332	5.6216	0.476374	1.72991	11.1467	7.06869	22.1496
210	4.51797	1.493	4.36077	1.68876	1.76124	2.74064	12.8027	4.10442	24.2188
220	5.838	-0.205271	2.61718	4.18402	1.65532	-0.532783	16.6441	2.25308	22.726
230	7.23904	3.76414	2.26759	0.0165328	-2.32131	1.51641	11.3789	4.73951	19.851
240	0.780077	2.73279	1.54008	0.602819	1.1501	0.442356	4.60015	3.03473	19.8114
250	0.89171	-0.439814	1.18334	0.478298	-3.70293	2.85364	10.2623	4.8405	19.8259
260
270
280
290
300
310
320
330
340
350
360
370
380
390
