# Supplementary material for: BUB-1 promotes amphitelic chromosome biorientation via multiple activities at the kinetochore
Source: eLife journal article supplement (doi:10.7554/elife.40690), 2018-12-14
Supplement: supp [file elife-40690-supp-v1.zip › elife_poa_e40690_Figure_1_figure_supplement_2_source_data_1.xlsx]

## Sheet: Pole_Dist_Control
time from nebd (s)	embryo_1	embryo_2	embryo_3	embryo_4	embryo_5	embryo_6	embryo_7	embryo_8	embryo_9	embryo_10	embryo_11	embryo_12	embryo_13	embryo_14	embryo_15	embryo_16	embryo_17
0	7.63166	11.4081			11.1152	10.1432	12.4444	10.8004		12.1765	11.7394	12.5606	12.4368	11.8428	13.1956	10.1969	10.2903	12.5169	12.5732	10.0536
10	9.06417	11.4043		9.82891	11.522	10.362	12.5784	11.6001	9.56774	12.6958	11.8344	12.0748	12.8334	12.4379	12.9795	10.2947	10.8261	12.8527	12.2153	10.686
20	10.1969	11.8925		10.2168	11.4382	10.2212	12.2823	11.449	10.7805	12.5866	12.1775	11.9536	13.0639	12.6351	13.1725	10.2718	11.0061	12.9987	12.8742	10.8602
30	11.0625	12.3289		10.8794	11.4512	9.6594	12.5237	11.4237	10.8122	12.8155	12.6894	12.3272	12.7896	12.1867	14.1208	10.4786	11.3011	12.8788	12.8517	10.969
40	10.9205	12.4978		10.8407	11.7084	9.85933	12.6412	11.1172	10.9096	12.2123	12.9859	12.6462	12.9516	12.0844	13.606	10.7652	11.1246	13.4045	13.1801	10.7135
50	11.6801	12.5847		11.7052	12.114	10.043	12.2925	10.66	10.872	11.9081	13.2776	12.5079	13.1263	12.1523	13.3776	11.1592	11.6193	13.5663	12.786	11.1372
60	11.454	12.2998		11.6881	11.9727	9.92754	11.6929	10.9747	11.0051	12.4186	12.9737	12.5315	12.5483	12.2346	12.7668	11.308	11.6466	13.0281	12.5	11.718
70	11.8776	11.5152		11.6024	12.1528	9.90546	11.8902	11.0494	10.6083	12.6713	13.1234	12.3496	12.5972	12.4503	12.7417	11.9773	12.2249	13.0593	12.1189	11.9215
80	11.8775	11.3532		11.3512	11.832	10.5239	12.0191	11.1059	10.9971	13.0296	13.5076	12.4486	12.5992	12.3922	12.4852	12.4304	12.2149	13.0686	12.0294	12.3124
90	11.2825	11.5752		11.8994	12.1506	11.2001	11.9548	11.3727	11.2839	13.5346	13.9641	12.9577	12.821		12.6485	12.7359	12.2319	13.628	12.0382	12.6051
100	11.2261	11.9634		11.7018	12.987	11.7979	12.123	11.7219	11.5798	13.6472	14.3083	13.0902	13.2663	13.0556	12.9135	13.4121	12.1933	14.1101	12.4977	12.7494
110	11.3599	12.249		12.0947	13.1636	12.1614	12.5364	12.0933	12.071	14.0656	14.4357	13.4795	13.6632	13.2525	13.3207	13.5845	12.1586	14.2648	12.8689	12.8701
120	11.8072	12.9652		12.2309	13.6313	12.8768	13.176	12.1038	12.3845	14.029	14.3791	13.7615	13.9992	13.5952	13.7509	13.9492	12.0455	14.4064	13.4649	13.0604
130	12.8394	13.6177		12.6809	14.1509	13.3595	13.591	12.5883	12.7248	14.5047	14.6879	14.0513	14.5391	13.9447	14.1605	15.2656	12.2075	15.0468	13.4342	13.2328
140	13.102	14.2609		12.9985	14.498	13.5412	13.8967	13.0136	12.8987	15.524	14.8947	14.3719	15.783	15.3508	14.7205	16.2516	12.5844	15.6601	13.9665	14.024
150	13.3069	14.7228		13.3869	14.7697	14.198	14.3914	13.7584	12.9785	16.5037	15.662	14.9903	16.8099	16.1148	15.7191	17.196	13.8516	17.1228	15.4461	14.9983
160	13.629	15.8333		13.8526	15.7129	15.378	15.2727	14.8541	13.4853	16.9774	16.9563	16.183	17.5493	16.6102	16.7043	17.4307	15.1335		16.5941	15.749
170	14.103	16.9565		14.9329	16.5482	15.9898	16.045	15.7072	13.876	17.6074	17.78	17.0213		17.177	17.5686	17.9805	16.196	18.7102	16.9971	16.3905
180	14.6704	17.6185		15.8433	17.8011	16.8116	17.0402	16.32			18.7357	17.9123	18.7214	17.8411	18.4881	18.8735	16.6124	19.4112	18.3126	16.8622
190	16.063	18.7205		16.5386	18.5333		17.8705	16.7651	14.7399	18.9175	19.2416	18.3527	19.2657	18.2833	18.9187	18.8477	17.3489	20.0752	18.5279	17.2942
200	16.6574	19.362		17.1158	19.4874	18.3576	18.3448	17.412			19.8808	18.8203	19.8731	18.9103	19.7054	19.4835	17.9171	20.4681	19.4761	17.9479
210	17.8189	19.6409		18.1818	19.9796	19.0293	19.0247	17.9154	16.5585	20.3347	20.0599	18.8621	20.298	19.2557	20.0637	19.8378	18.3404	20.6928	19.8722	18.1984
220	18.3144	20.1956		18.6862	20.594	19.506	19.6207	18.295		20.0672	20.8521	19.5996	20.5094	19.7687	20.8129	19.7835	19.0827	21.3612	20.1295	18.6783
230	18.9974	20.6736		19.3261	20.7499	20.0531		18.5403	17.5661		21.2004	19.7628	20.9198	20.4475	21.0648		19.4315	21.3376	20.7411	18.5857
240		20.7147		19.882	21.223	20.2719	20.2379	18.9727	18.3936		21.4799	20.0335	21.1087	20.7388	21.293		20.134	21.7114	20.8964	19.1736
250		20.5851		20.2268	21.121	20.8012	20.4579	19.5271	18.7425			19.8891			21.724		20.134
260		20.8048		20.5423		21.0802		19.844	18.8871
270		21.084		20.9928		21.2066		19.8276	18.8142
280		21.1499						20.3482	19.742
290
300
310
320
330
340
350
360
370
380
390
400

## Sheet: Pole_Dist_Delta hcp-2
time from nebd (s)	embryo_1	embryo_2	embryo_3	embryo_4	embryo_5	embryo_6	embryo_7	embryo_8	embryo_9	embryo_10	embryo_11	embryo_12	embryo_13	embryo_14	embryo_15	embryo_16	embryo_17
0	10.9112	10.7421	8.79917	11.2549	9.01376	8.51794	11.1962	7.50901	10.3455		11.7146	10.1151
10	10.9092	10.8896	10.3281	11.1679	10.3498	8.949	11.0146	7.82108	10.5376		11.8258	10.1819
20	10.951	11.0067	10.5462	11.2799	10.5593	9.06272	11.4662	7.83314	10.5969		12.1351	10.127
30	11.337	10.9616	10.7424	11.6104	11.9828	9.40483	11.2676	7.59917	10.7711		11.7766	10.0998
40	11.171	11.0492	10.8488	11.6981	10.8433	8.9029	11.2993	8.1935	11.0477		11.6711	9.86876
50	11.8994	11.704	11.6706	11.6808	11.5174	9.04769	11.4761	8.03762	11.0494		12.5943	10.1163
60	11.4428	11.5174	11.2384	11.872	12.0197	9.60008	11.4906	8.41257	10.5957		12.5638	10.0804
70	11.4064	11.5437	11.5564	11.9621	12.5905	9.81956	11.5183	9.13157	10.5656	8.44039	11.8085	10.3238
80	10.9783	11.6166	11.6583	12.0122	12.8899	10.3164	11.7237	9.95491	10.387	8.55804	11.8862	10.6929
90	11.3841	11.792	11.8346	12.2465	12.9642	11.0572	11.9882	11.1167	10.5956	9.28572	12.2051	11.1276
100	11.5029	12.243	11.882	12.6129	13.3758	11.7477	12.4178	11.4599	11.1905	10.2869	12.6905	11.884
110	11.9211	12.4325	12.2852	12.6699	13.6565	12.0454	12.6933	12.654	11.6644	11.6651	13.0944	12.3738
120	12.1324	12.7494	12.5955	13.1783	13.5816	12.5018	12.8936	13.0102	12.1437	12.2725	13.5671	12.6807
130	12.5125	12.8082	13.1449	13.8941	13.7918	12.5723	13.1697	13.706	12.6798	12.9163	13.7476	13.8105
140	12.8156	13.2069	13.4643	14.2055	13.9141	12.8654	13.3729	14.056	13.0027	13.0942	14.0196	14.2288
150	13.4239	13.2466	14.13	14.8946	14.9104	13.2287	13.9464	14.5087	13.4947	13.5407	14.2502	14.2509
160	13.6995	13.9142	14.2641	15.9605	15.2517	14.154	14.7117	15.5734	13.8848	13.7132	14.4673	15.4814
170	14.8861	14.5329	15.382	16.5963	16.5661	14.6923	15.1572	16.8259	14.6375	14.4235	16.1629	16.3124
180	15.6406	15.9395		16.9155	16.9643	15.176	15.996	17.2026	15.4737	15.3774	16.9797	17.1148
190	16.7958		17.4695	17.9628	18.0094	16.1589	15.6117	17.9543	16.4001	15.5048	17.8491	18.0829
200	16.759	17.4914		18.4342	18.5811	16.3691	16.5671	18.5111	16.8974	16.4748	18.5758	18.8758
210	17.8431			19.1152	19.1905	17.1677	16.6567	18.9017	17.197	17.2527	19.1883	19.2124
220	18.3741	18.5254		19.3917	19.5012	17.5667	17.7824	19.5384	18.4416	17.8717	19.5957	19.9835
230		18.5335		19.9688	20.0841	18.0463	18.4251	19.9945	18.5478	18.4107	20.1601	20.1558
240	19.5369	19.5759		19.9362	20.146	18.4087	18.8202	20.5918	19.184	19.0749	20.4114	20.4339
250				20.3132	20.3196	18.8957	19.171	20.6004	19.683	19.2418	20.9187	20.7733
260	20.3823			20.6859	20.2557	18.9303	19.1585	20.722	19.9867	19.505	21.1329	21.1263
270	20.4186			20.7441	20.5265	19.7819	19.4917	21.2155	19.7765	19.9832	20.888	21.1446
280				20.5864	20.2466	19.9595	19.682	21.1596		20.2664	21.7586	21.6021
290				21.1756	20.4264	20.0059	19.9069	21.629		20.2126	21.9576	21.8235
300				21.4187	20.5804	19.9234	20.633	21.4432		20.5442	22.4034
310				21.0467		20.8202	20.4689	21.3392		21.0393	22.609
320						20.9139		21.6941		20.868	21.9576
330										21.3637	22.4034
340						21.1485					22.609
350
360
370
380
390
400

## Sheet: Pole_Dist_hcp-12 rnai
time from nebd (s)	embryo_1	embryo_2	embryo_3	embryo_4	embryo_5	embryo_6	embryo_7	embryo_8	embryo_9	embryo_10	embryo_11	embryo_12	embryo_13	embryo_14	embryo_15	embryo_16	embryo_17
0	10.4744	10.8237	11.1359	11.5213	6.66469	11.8609	11.5676	10.1163	10.3293	11.8365	9.15779	13.0127	8.82833	9.04732	11.3978		11.5834	11.6657	10.8497	11.1504	11.8865
10	10.9464	10.599	11.3283	10.7345	7.34422	11.8199	11.9896	11.0398	10.3375	12.1704	9.2675	13.5808	10.21	8.27722	11.645		11.7123	11.9737	10.8225	10.998	11.8141
20	11.3719	11.382	11.3015	11.1112	7.998	12.1458	11.536	11.3248	10.2737	12.1608	10.1713	13.2655	10.2612	8.17738	11.8389	7.30545	12.3123	11.6703	10.8492	11.0532	11.6231
30	11.8547	11.4987	11.2274	11.2946	8.5043	12.5351	11.7569	11.9357	10.3959	11.9538	9.43554	13.0985	10.9797	8.98007	12.1193	7.5843	12.6234	12.1073	10.5071	11.4976	11.6771
40	11.9011	11.4202	11.4755	11.4464	9.75605	13.1659	12.3334	12.7228	10.5855	12.3235	9.8058	13.4474	11.4534	9.21794	12.3192	7.56025	13.1489	11.9252	10.7586	11.6717	11.7498
50	12.6474	11.6851	11.9514	11.8601	11.4566	13.8512	12.5994	13.2876	11.0883	12.4316	9.68449	13.9672	12.2652	9.63433	12.7424	8.07042	13.7103	12.1533	10.8923	11.8232	11.9688
60	13.584	11.9056	12.5632	12.3421	12.9354	14.4883	13.4349	13.4888	11.5617	12.2831	10.1017	14.8229	13.2861	10.1036	12.9887	8.91721	14.1328	12.2239	10.8659	11.9522	12.5659
70	14.3757	12.7606	13.6705	13.0397	14.8827	14.7195	13.9547	15.4573	12.6881	12.7501	11.1074	14.5798	14.3359	10.9284	13.2449	10.0234	14.9171	12.9077	11.3912	11.8725	13.3548
80	16.4995	13.5917	15.1914	13.3002	17.3543	15.8621	14.6085	17.3066	14.2378	13.5357	12.0998	15.6279	15.1346	11.5854	13.8255	10.7232	15.8838	13.1858	11.7923	12.8897	15.008
90	19.0385	14.3096	16.3399	15.0384	20.2135	17.5092	14.6217	18.768	17.7383	14.2044	13.3932	17.5313	16.8661	13.335	15.1404	12.2955	18.4731	13.7053	13.0422	13.745	18.0021
100	20.2462	14.8715	19.1252	17.0989	21.8522	19.6348	16.4405	20.3451	19.4964	15.8818	14.7484	19.4815	19.6373	15.2244	17.634	13.6203	20.5714	14.5296	15.0558	15.723	20.231
110	21.6173	16.4371	20.0603	19.1817	23.6458	21.39	19.3041	21.2384	20.4381	17.114	18.0167	20.7385	20.7228	19.7083	20.2756	16.1561	21.5988	15.6809	17.7966	16.8819	22.687
120	23.7055	18.3213	21.223	20.9004	24.2869	23.3834	19.5543	21.9088	21.4123	17.4618	22.1038	20.3638	22.4123	21.914	20.133	18.1834	22.3022	17.1074	20.71	18.732	23.6497
130	23.8011	18.6239	22.8049	22.5247	25.4216	25.1365	21.1457	22.324	21.6881	19.5461	25.0968	23.2218	23.395	23.1341	22.0555	20.5005	23.13	19.03	22.0678	19.7933	26.1368
140	24.6568	20.3856	23.581	22.7368	24.8328	25.9632	21.5938	22.8394	22.2612	21.3622	25.7868	23.6068	23.7335	23.6295	24.1315	21.9671	22.8715	20.607	23.4454	20.8058	26.7862
150	24.5172	21.7622	23.9285	23.5822	24.7961	26.9614	23.3502	22.8729	22.1722	21.6282	25.9999	23.1046	25.0687	23.492	24.9618	23.0424	23.526	21.042	23.392	21.6169	27.5258
160	25.097	21.5612	23.8315	23.9341	24.6763	27.4422	22.7079	23.4214	22.3908	23.0499	25.9613	23.9231	24.3903	24.201	24.1537	23.6867	23.5749	20.9982	23.2551	22.0833	27.9206
170	24.6363	21.7867	23.391	23.5644	23.7874	27.3641	22.6416	22.7883	22.5114	23.5536	25.5212	24.0934	23.6114	23.8623	23.9969	23.4391	23.191	21.4037	22.8909	22.3234	27.098
180	25.191	22.1458	23.5788	23.021	24.2433	27.1036	22.0831	22.2462	22.2333	24.4876	25.3023	23.8074	22.8388	24.2193	23.2585	23.0654	22.9927	22.0842	23.1815	21.8017	26.9023
190	24.6896	21.2936	23.1924		24.0314	27.5178	21.2231	23.5325		25.6668	25.3331	23.6121	21.6348	23.6295	25.049	23.7556	22.1837	21.4474	22.8073	22.1566	26.5424
200		22.2002	23.8573			26.6946	21.8686			25.944		23.1378	22.3799	22.8345	22.4051	23.3493	21.3785	20.3722	22.6925	22.1548	26.5855
210		21.2778	23.8077			26.8748	21.9858			25.923		22.6212	21.1842	22.8539	24.1275	23.2371		21.286	22.6052	22.5472	26.2558
220		21.8852	22.6456							25.3203		22.1926		22.8505	23.724	23.5642		21.9978	22.7946	23.0327	25.6685
230			23.0662							25.6431		22.0346		23.136	23.7922	23.1951		21.783		22.5594	25.7265
240		20.9597	22.1564							24.3251		22.509		22.7344		22.7869		21.1305		22.6944	25.3889
250		20.3704	22.5924							24.4719		22.259		22.4356		23.025		20.8156		22.6322	24.792
260			21.988									22.6297		21.9377		22.3995		20.6333		22.1242	25.2129
270		21.1558	21.8912									23.4267		21.9554		22.4372		21.1627		22.1553	25.4554
280		21.5151	22.2514									23.6439		21.5106		22.0452		21.5727		22.3717	24.7867
290												23.5324		22.0097		21.4074		21.1125		21.5952	23.9758
300		22.7184										24.3173		21.999				21.3259		21.8853	24.183
310		22.6089										23.6595		22.8193				20.3212		20.3971	24.9769
320		22.5341										23.6233
330		23.1665
340		22.5244
350		22.8962
360
370
380
390
400

## Sheet: Pole_Dis_hcp-1 rnai Delta hcp-2
time from nebd (s)	embryo_1	embryo_2	embryo_3	embryo_4	embryo_5	embryo_6	embryo_7	embryo_8	embryo_9	embryo_10	embryo_11	embryo_12	embryo_13	embryo_14	embryo_15	embryo_16	embryo_17
0	9.70356	10.5188	11.6926	11.1542	9.68958		9.45097	12.9136		9.90621	11.7069	10.6785	10.6615
10	9.81733	10.632	11.7754	11.4125	10.1202		10.1705	12.9107		10.0772	12.1772	11.3969	11.4538
20	9.91205	10.795	11.9133	10.8696	10.4669		9.89196	12.4517		10.2271	12.6675	11.567	11.2848
30	10.542	10.7261	11.7657	12.1535	10.6363		11.1273	13.2632		10.7126	12.4848	11.4463	11.7286	7.05527
40	10.243	11.2623	11.9479	12.8569	10.3542		11.7012	14.4675	11.956	11.3817	12.9773	11.6081	12.489	8.02809
50	10.3096	11.6611	11.7739	13.0789	10.4671		11.509	14.9028	11.6773	12.3468	13.1385	12.1953	13.5857	8.80066
60	11.8263	11.9038	11.4632	13.4013	11.0379	12.665	10.7471	15.9476	12.9455	12.7203	14.0999	12.914	14.5936	10.8787
70	13.7292	13.1967	12.9801	14.2063	11.9889	15.3374	12.258	17.1857	14.7358	15.6675	14.2795	13.2797	16.1313	12.8996
80	16.3549	18.8942	14.7519	15.7078	14.3644	18.6999	13.7771	18.881	16.5778	17.7711	15.0237	14.6247	17.8481	14.8967
90	19.3744	21.6552	19.0876	17.6285	19.1377	21.4203	14.8245	19.8338	18.4202	20.2936	16.5717	15.2549	19.5719	17.1064
100	20.4598	23.5694	22.2152	20.324	21.828	23.1126	16.4187	22.832	19.7702	21.5546	17.0577	16.9591	20.824	19.0418
110	21.354	24.2612	22.269	23.0173	23.0691	23.8369	19.1835	22.6973	22.2575	22.6482	18.836	18.0965	20.6321	21.4895
120	21.2128	23.0164	22.7859	23.673	23.2553	24.0479	20.88	23.6525		22.5641	20.3934		21.1456	22.4526
130	20.8639	24.4814	23.2824	24.0981	23.7741	23.3538	23.0949	22.9776	22.3528	21.8527	21.2407	21.4052	22.1804	22.5869
140	21.2942	25.4832	22.4646	23.3131	23.6442	23.4933	23.2448	23.1539	21.4549	22.216	20.5052	22.4942	22.5102	23.2696
150		24.7352	22.7279	24.509	24.3323	23.1408	23.3003	22.0817	21.4496	22.7386	20.8404	21.3941	22.0753	22.614
160	21.1824	24.2151	21.4901	24.0363	23.1334	21.8154	21.2491	22.6208	21.5592	21.8816	18.8922	21.6591	22.4612	22.5437
170	21.2253	24.7279	23.0628	23.6159	23.4672	21.3508	22.541	22.0902	21.2734			21.1829	22.0384	21.4087
180	21.2684	24.0998	22.7607	24.1243	23.4848	20.8585	21.6341	21.8881			19.7861		21.7023	21.1822
190	21.9233	23.4809	23.2518	22.8177	23.7918	20.2326	21.4812	21.3831			19.2357	20.1737	21.8657	21.3987
200	21.9654	24.0991			21.6567	20.8866	22.1152	20.808	20.7965		20.2347	20.2355	21.0173	21.475
210	20.2853	23.4029	22.8736	24.4589	22.5699	20.233	21.0655	22.0189			20.1226	19.4702	21.3444	20.6617
220	20.5151	23.1594		23.4058	22.3658	20.7987	23.1646		20.8593		19.3288	19.7315	21.553	20.5749
230	20.5152	23.1469	22.8781		22.3817	20.2099	22.5367		19.5074		20.8165	20.2312	21.9983
240	19.722	22.7387	20.914		21.5959	20.6701	21.9617	21.7435	19.4052		19.8075	19.3378	21.3337
250	18.9153	22.9659	20.9941		21.9359	21.4327	22.3579	21.4562			19.3041	21.3041	21.8269
260		21.899	20.804		22.3969	20.5959	22.5093	19.0812	19.4112		20.388	21.3151	19.8599
270		21.1128			21.0772	19.6351		20.6475	19.9545		20.385	21.9337	20.0894
280		21.0784	21.842		21.6601	19.1788			19.4239		20.9955	22.069	21.1076
290		20.8765			21.8511	19.0176			19.7569		20.4438		20.6034
300		21.5261			22.808	19.5486			20.2704		21.1715		20.2284
310		22.4912			23.3378	20.094			19.4294				21.079
320		22.3133			23.6177	20.6207			19.9895		21.7657		21.1465
330		21.6889			23.2766	21.6576			19.4294		22.0947		21.961
340					22.3058	21.1149			19.9895				21.4731
350						21.9776							21.7179
360						22.2972							22.249
370						22.1543							23.3303
380						22.3035
390						22.6139
400						22.6103

## Sheet: Chr_Span_Control
time from nebd (s)	embryo_1	embryo_2	embryo_3	embryo_4	embryo_5	embryo_6	embryo_7	embryo_8	embryo_9	embryo_10	embryo_11	embryo_12	embryo_13	embryo_14	embryo_15	embryo_16	embryo_17
0	9.23205	6.9015			8.56154	6.63462	7.81047	7.46474	8.46645	6.09722	6.95769	7.09081	7.67543	6.5968	7.64637	3.75064	3.73056	8.20192	8.10876	4.63782
10	9.62692	7.30427		7.97778	8.27308	6.18013	7.54915	6.52051	7.06133	6.42521	6.46624	7.4485	7.2312	6.40342	7.28034	3.6797	3.60128	6.27137	7.51239	4.36795
20	8.93974	7.65791		6.18462	8.15833	6.51581	6.56239	5.41496	8.0156	6.19658	5.23825	6.63162	7.13355	6.32115	5.33376	3.56346	3.7515	6.19658	7.5515	5.13611
30	8.58312	8.40492		7.98996	6.77201	7.50064	6.95812	4.14081	7.39444	5.64124	5.64744	6.52265	5.54573	4.70641	6.87799	2.75983	3.02414	7.05449	6.91474	4.8938
40	6.72586	7.89316		5.30385	6.91218	6.0609	6.7859	5.16175	6.05791	5.46261	4.31667	6.59209	5.90021	5.55791	5.29423	3.37885	3.39744	4.55833	6.88077	3.58461
50	5.85598	8.28333		5.51068	6.75278	6.21774	6.72586	5.57286	5.27115	3.6797	3.27949	3.79316	4.22863	3.20961	5.13312	2.92244	3.41303	6.98034	5.83056	3.31709
60	5.98333	5.74102	8.63932	4.36389	6.63462	5.14786	5.09701	4.56068	5.06496	2.47244	4.61068	3.74893	3.63611	2.47009	4.69103	3.02607	3.39573	4.05983	4.81026	3.22479
70	6.77564	4.87671	7.54915	3.56987	7.45278	3.95855	5.07094	4.57286	5.275	2.87479	3.68867	3.4391	3.20919	2.43675	5.32094	3.39231	2.68846	4.06538	3.53697	2.96838
80	5.76923	4.49786	8.07393	3.93291	4.04038	3.91795	3.35961	3.6609	4.43034	2.08013	3.02991	2.57308	3.15577	2.58013	3.61645	3.10556	2.68633	3.20833	3.41368	2.67735
90	4.7203	3.46603	6.2032	4.38825	3.32543	2.97436	3.0594	3.32543	4.20278	1.99551	2.44145	1.92607	2.56474	2.80748	2.27244	3.37222	2.87671	3.14124	2.84359	2.55321
100	2.79231	2.88077	6.46731	3.42479	3.99423	3.06603	2.54829	3.16368	3.06346	2.01709	2.50385	1.81709	2.08953	1.94231	2.19423	2.46239	2.09487	2.49701	2.90021	2.49295
110	2.23077	3.43739	3.96432	2.63632	2.98205	3.14124	2.35897	3.10534	2.57308	1.82414	2.48504	2.46239	2.35107	1.93568	2.41004	2.20641	2.07778	2.16624	2.03953	2.21261
120	2.92799	2.88077	3.45492	2.31133	3.30491	2.93675	2.23547	3.0485	1.99936	1.81303	2.71389	2.24936	1.81944	1.74402	2.13675	2.68846	2.65855	1.8532	2.35897	1.98034
130	2.16624	2.79231	3.58184	2.3515	2.46944	2.52628	2.01068	2.76581	2.42265	2.01709	2.10449	2.35107	2.29765	2.34124	1.78056	3.86432	1.77564	2.15556	2.25235	1.82009
140	2.71218	2.0656	2.61303	2.50919	2.42585	2.59273	2.32543	2.33632	2.42585	3.83953	2.1797	1.92607	4.06133	3.9	2.29701	6.02585	2.04466	2.65919	2.32885	2.87479
150	2.22628	2.57992	2.32009	2.32543	2.42585	2.64979	2.16624	2.92286	2.28034	5.72863	3.40919	2.40385	5.18419	5.16068	3.18932	7.17906	3.52393	4.44167	5.09338	4.91197
160	1.52265	3.42543	2.32885	2.41966	3.12414	3.87308	3.70363	4.20897	2.01453	6.78483	5.73483	4.14786	6.25812	5.94124	5.11731	7.72799	5.38996	6.37137	5.77094	5.89786
170	2.24893	5.88077	4.03974	3.88098	5.4515	5.5765	5.92714	5.64893	3.99423	7.04124	6.95064	5.7188	7.00107	6.74038	6.80342	8.14081	6.62735	7.26346	6.87051	7.10427
180	3.22479	6.71944	6.74273	5.07692	6.99936	6.73632	6.79936	6.17735	5.48611	7.27778	7.57863	7.15983	7.10791	7.05171	7.12244	8.84915	7.80897	7.88932	7.80556	7.65064
190	5.28803	7.52991	6.54722	6.77991	7.36923	6.99679	7.84295	6.83056	5.77628	7.93419	8.21047	7.10641	7.91047	7.62671	7.79316	9.07329	8.55577	8.54957	8.45299	8.04081
200	6.86175	7.63312	7.76645	6.73184	8.57137	7.56538	8.20192	6.92094	6.79038	8.73312	8.79402	7.92778	8.76474	8.01731	8.35641	9.62799	9.16923	8.68974	9.18825	8.6359
210	7.44744	8.47842	8.3062	8.02073	8.73312	8.14744	8.71068	7.87991	7.19936	9.4797	8.77927	8.12329	8.8141	9.04338	9.34551	9.69103	9.74722	9.28654	9.50171	9.1859
220	8.39274	9.28141	8.45449	8.86538	8.81389	8.5235	9.23868	7.9953	7.8609	9.08697	9.3391	8.58974	8.71133	8.71453	9.27842	10.6088	10.1242	9.72415	9.46026	9.62201
230	8.97585	9.81624	9.29444	9.36773	9.64915	8.7609	9.53291	8.26496	8.24295	9.34551	10.1075	9.08462	9.3047	9.39103	9.85919		10.7754	9.9718	10.3235	9.67735
240	8.74658	9.98397	9.72692	9.72137	9.95769	9.1859	9.9718	8.75256	8.84231	9.62073	10.6519	9.5109	10.1509	10.0938	10.3103		10.7848	10.2566	10.344	10.357
250		10.8346	10.0455	10.1382	10.2269	10.1938	10.7742	9.40192	8.7609
260
270
280
290
300
310
320
330
340
350
360
370
380
390
400

## Sheet: Chr_Span_Delta hcp-2
time from nebd (s)	embryo_1	embryo_2	embryo_3	embryo_4	embryo_5	embryo_6	embryo_7	embryo_8	embryo_9	embryo_10	embryo_11	embryo_12	embryo_13	embryo_14	embryo_15	embryo_16	embryo_17
0	7.11432	8.02073	9.06795	6.06047	7.47863	6.89081	6.67885	8.33568	6.63761		7.5891	8.00064
10	7.87201	7.22329	9.57714	5.6015	7.07991	6.86026	6.56047	7.40491	6.04231		7.21902	7.78825
20	5.93056	6.62436	7.90171	4.21859	7.26539	6.26539	5.60748	7.26987	5.53333	7.19509	6.37051	4.71325
30	5.93397	4.88611	6.78739	4.78526	5.70919	6.01709	4.61731	6.67543	6.33889	6.48739	5.89487	4.02201
40	2.96709	4.28825	6.66218	4.2047	5.08547	6.91774	3.6032	6.64487	5.57714	7.26816	4.65085	3.82543
50	3.91816	5.13312	6.05214	4.43034	3.63526	6.2859	3.54017	7.44637	5.20833	6.66367	4.65577	3.94188
60	3.20192	3.41368	5.63803	2.86325	3.69402	5.10641	2.93419	7.16367	4.01923	5.98461	4.49679	4.18248
70	3.17735	2.45278	5.67308	3.03269	2.62756	4.71603	3.35961	5.81261	4.5391	4.27479	3.2515	2.93846
80	2.92244	2.74103	3.98483	2.72991	3.23974	3.8547	2.36774	4.48953	4.01603	3.49295	2.33312	2.46068
90	2.52137	2.52628	4.04551	2.9547	3.32009	3.26239	2.68611	3.94893	3.73782	4.21197	2.29359	3.01902
100	2.31923	2.09487	3.21859	2.59273	2.67735	3.00577	2.42821	3.65	2.67735	3.81303	2.80598	3.12073
110	2.37222	2.14274	2.93675	2.56816	2.19423	2.33312	2.35278	3.09231	2.77051	3.33013	2.13803	3.38611
120	2.42222	1.95962	2.48782	2.04081	2.01068	2.39423	2.1015	3.2515	2.45791	3.12906	2.07051	3.58184
130	2.26752	1.98675	2.26346	1.82564	2.05449	2.30128	2.11197	2.46944	2.19594	2.47244	2.77778	2.53333
140	2.32906	2.12479	2.20919	2.23547	2.1032	2.26346	2.1015	2.2297	2.08611	2.70748	2.96239	1.70449
150	1.82714	2.07415	2.11774	2.99573	3.1765	2.66966	2.75043	1.8641	2.08055	2.43419	2.59273	2.72073
160	1.91261	2.82222	2.19872	4.82073	4.66902	3.65	4.14637	3.65	2.31197	2.39423	2.93675	3.02564
170	3.44252	4.41474	3.64637	6.11581	5.74466	4.79124	4.73974	4.9985	3.36709	3.17329	4.28526	4.81026
180	5.02393	5.66624	4.74701	6.96496	6.60406	6.05406	6.05406	6.03226	4.41346	4.55171	5.84081	5.9641
190	6.21581	6.73376	6.07094	7.31581	7.41047	6.32265	6.59936	7.25278	5.57201	5.69124	7.39444	7.09722
200	7.94914	7.2594	6.74081	7.80791	8.18974	7.08718	7.2109	7.72564	6.67009	6.53568	8.06645	7.75299
210	7.59744	7.57607	7.40812	8.48056	8.67201	8.39765	7.23697	8.13654	6.9765	7.01496	8.87436	8.59338
220	8.23761	8.19872	8.01175	8.51496	9.02393	7.85556	8.35278	8.9032	7.6344	7.57329	8.8906	8.87308
230	8.7188	8.38397		8.92842	9.33483	8.50555	8.11624	9.47073	8.02073	7.77521	9.46026	9.40192
240	8.72735	9.34594		9.22329	9.55726	8.90427	8.60684	9.31752	8.27992	8.61346	9.92286	9.57286
250	9.3688	9.65769		9.89915	10.8348	8.77265	8.83654	9.44509	8.72479	8.53654	10.2893	10.013
260	9.64444	9.45983		10.3814	10.7049	9.41902	8.91453	9.98013	9.36624	8.89744	10.7707	11.1449
270	10.2613	9.83269		10.1412		10.0551		10.5066	9.32158	9.37137	10.5147	10.8284
280	10.1951	10.7103						10.8833	9.90128	9.86624	11.4423	10.8472
290									10.2686	9.75256
300										10.0085
310
320
330
340
350
360
370
380
390
400

## Sheet: Chr_Span_hcp-12 rnai
time from nebd (s)	embryo_1	embryo_2	embryo_3	embryo_4	embryo_5	embryo_6	embryo_7	embryo_8	embryo_9	embryo_10	embryo_11	embryo_12	embryo_13	embryo_14	embryo_15	embryo_16	embryo_17
0		8.57094	5.48996	5.25577	7.97778		6.24594	10.753	5.41496	5.49594	7.38825	5.28611	6.41068	8.71624	9.71517	5.86731		7.37714	7.27094	8.45299	6.42009
10		7.19936	5.38355	4.27585	7.30427		5.21111	9.69936	7.90171	3.45492	6.89701	5.58462	6.20684	6.72115	6.4297	3.49081		6.38376	7.09722	7.44637	7.04808	6.69252
20	9.75577	6.15171	5.60876	3.79295	6.37842	6.42457	5.23889	7.40577	7.96517	2.9547	5.54829	5.075	6.21667	5.78462	7.1015	4.14637		5.91004	7.79231	5.67158	5.85598	7.83868
30	6.05919	5.71987	3.82906	4.26047	6.40748	5.02244	5.10684	4.77799	10.2744	3.49295	5.00919	4.22393	5.63398	4.59658	5.69124	4.28291		6.23739	7.55128	4.34701	4.82073	7.54615
40	8.05064	4.93974	3.03269	5.76346	6.4438	6.5485	6.83953	4.47436	10.7267	3.49295	4.31667	3.65	6.74081	4.75128	5.76346	4.22393		5.10684	6.8141	3.71474	5.7015	8.2218
50	5.15833	6.05791	4.11004	4.18291	7.87543	7.82543	7.04124	4.03162	11.0032	3.56773	3.69402	4.91453	6.29359	4.7359	6.10427	4.63184	6.88077	6.48782	5.67308	4.22393	4.89017	8.80684
60	4.80385	8.00299	4.9062	8.43611	8.80107	8.68077	6.77991	4.42308	10.4942	6.71944	4.34701	4.92735	8.35299	6.61773	6.69658	4.45256	7.12692	5.88376	6.2047	3.45492	6.49679	9.23739
70	5.82222	9.27265	5.28611	9.07949	10.5874	9.22521	6.94551	6.66944	11.8383	8.05812	4.34701	6.18462	7.58633	7.23697	8.04872	6.9891	8.10833	7.29316	5.15278	5.21688	6.14893	9.34786
80	7.0688	11.478	5.92586	11.232	9.28697	12.1814	8.81731	7.62821	13.5323	8.95427	7.66731	6.9703	10.4568	9.23461	9.325	8.41538	7.94124	10.5953	7.51795	5.96966	6.21774	10.5412
90	9.36389	13.9718	7.71667	11.0803	10.3169	15.4808	12.4455	9.48205	13.8282	11.1496	8.67692	7.72949	11.9974	11.4938	10.1353	10.9744	9.89915	13.3284	8.26026	7.42415	8.58974	12.7383
100	10.5385	15.6799	10.4254	14.2573	12.684	16.6421	14.3075	12.4835	14.9301	13.9472	9.62201	8.84573	14.6808	14.1335	10.5588	12.5165	10.5049	15.5923	9.32393	9.68034	10.5049	14.893
110	12.9934	17.0252	11.134	15.9515	16.0861	18.6701	15.4912	14.9669	15.5329	14.1481	10.0891	13.3158	15.91	14.0733	11.4194	13.9957	10.372	17.313	10.3235	12.4303	11.4395	17.8167
120	16.2231	17.2242	12.759	16.0068	17.7694	21.0002	17.4703	15.7143	17.1086	16.0889	10.2449	16.9977	14.8876	18.413	13.8306	15.5799	13.1934	16.882	11.9389	14.7566	13.4658	18.7656
130	17.7066	17.969	14.7182	19.1056	18.9197	21.7259	18.5105	16.6235	18.9124	15.0393	11.6829	19.5765	17.619	17.4306	15.7729	17.2389	15.66	18.0201	12.9942	16.9265	13.4419	21.5562
140	19.0291	20.8056	15.9293	18.775	19.6417	20.887	20.9133	17.9957	18.797	16.6912	13.4633	18.9502	19.0192	18.131	19.1654	18.4782	17.2128	18.2795	14.7876	18.0222	14.2707	21.347
150	18.0314	21.1568	16.6949	19.6075	20.2573	21.415	21.2878	18.2214	18.812	15.3968	15.3927	19.4021	19.4028	20.8222	18.9167	19.2235	18.3568	20.2483	15.3188	19.2182	14.5767	21.816
160	20.0912	21.8485	18.0047	18.0564	20.7197	20.6603	21.4551	18.1818	20.4133	16.64	18.5137	19.0876	20.5451	19.6603	19.6985	19.1468	18.0754	19.9045	16.015	19.4021	16.759	21.8177
170	20.3709	21.2395	18.2015	18.678	20.184	20.0701	20.6727	18.4013	18.9652	16.1925	18.7128	20.1573	22.3429	17.6812	19.8237	18.9872	17.6464	18.6583	15.3224	19.8451	16.9692	20.4476
180	20.6786	21.0846	18.2438	19.6201	19.1776	20.5342	22.5434	17.1385	17.8583	16.9667	19.2263	19.391	19.5528	18.0201	18.0222	18.6256	19.4799	17.7585	16.631	18.3028	16.2419	19.7237
190	19.7306	20.0154	18.953	19.4246		19.7406	23.7412	16.9654	18.678		19.334	19.507	20.0477	16.4752	19.0342	18.3028	19.4154	16.7925	15.8654	18.5733	16.9996	20.4122
200	18.9218	20.4417	19.6592	19.1425			21.8949	18.1703			20.4517		18.5801	17.625	19.7066	18.3327	18.8143	15.3731	17.1417	18.4541	16.4697	18.7598
210	18.5011		19.4513	18.715			21.7336	17.5271			19.8333		17.8105	16.038	18.6118	18.4419	19.7808		16.944	18.0539	17.4549	18.8504
220	16.4321		19.3921	18.2977			22.1115				20.9594		17.5453		18.5658	17.4105	19.059		18.1314	18.3367	17.9434	19.794
230	15.5664		17.3071	18.6519							20.4981		17.237		19.0545	16.9237	18.7344		17.1816	18.8457	16.872	21.3177
240	14.1314		15.6023	15.5932							19.0314		17.0252		17.9442	16.9667	17.6829		16.4188		16.7718	19.9555
250	14.9325		15.9239	16.9733							18.3216		16.6733		16.563		18.7002		16.1297		15.8156	19.8861
260	14.2769		16.959	17.7989									16.7299		16.2679		16.4468		16.1457		16.5344	20.0288
270	14.0385		16.4235	16.9727									17.4476		14.7393		16.3656		17.3814		16.8989	18.3449
280	14.7092		16.6212	16.5244									17.9397		15.1212		15.8628		15.6987		15.3665	18.3938
290	14.9079		16.993										17.3605		14.4295		14.8423		15.9558		15.9906	18.5331
300
310
320
330
340
350
360
370
380
390
400

## Sheet: Chr_Span_hcp-1 rnai Delta hcp-2
time from nebd (s)	embryo_1	embryo_2	embryo_3	embryo_4	embryo_5	embryo_6	embryo_7	embryo_8	embryo_9	embryo_10	embryo_11	embryo_12	embryo_13	embryo_14	embryo_15	embryo_16	embryo_17
0	5.60043	6.45363	6.63761	7.38227	6.93846		5.68953	5.65556		6.34231	5.19209	6.53718	5.85662
10	5.75342	5.08932	5.03526	5.98312	6.96154		5.75769	6.28162		6.10791	5.04081	4.41474	5.40983
20	5.56389	4.65235	4.61068	5.78205	6.88227		4.36068	7.02393		5.78846	4.30021	5.2	4.12821
30	4.3953	4.63056	4.41282	5.58547	6.22265		4.06303	5.80427		5.34701	3.4203	4.37329	5.63825
40	4.80086	6.11517	3.92906	6.53034	4.38184		3.69017	9.44402	4.52778	6.3406	5.09701	4.75299	6.93782	8.69594
50	5.44359	7.90598	4.01539	5.88205	7.06133	7.28462	4.26859	6.43547	5.51539	7.39231	6.24338	6.06047	7.63355	7.83633
60	7.99509	7.14551	5.52799	6.24808	8.09359	9.94103	5.67842	10.5573	7.1485	6.02051	10.3925	7.16859	8.16453	6.58761
70	10.228	8.80171	7.73397	6.1953	9.01496	12.1492	9.04423	12.4254	11.3972	10.1333	10.9549	9.08697	11.243	7.59231
80	12.3919	15.4491	11.9365	10.6218	11.6175	15.6094	9.62265	14.4013	13.0342	12.1462	12.4521	11.2853	14.1353	10.4707
90	14.8476	18.1291	15.9977	12.9487	15.4573	17.8004	10.5776	15.5002	14.3417	15.3472	13.1085	11.8921	15.7489	12.7006
100	16.0592	20.0481	19.1908	15.303	17.315	18.2974	12.0002	17.7812	15.2793	17.0353	13.6718	12.5261	16.453	14.6254
110	17.0372	21.1068	18.8265	18.197	18.7485	19.7532	15.9098	17.9115	17.3919	17.5511	14.0524	14.135	14.2098	16.1833
120	17.8278	20.0773	19.1404	19.3267	19.9481	20.5942	16.5169	19.0171	16.9876	19.3254	16.2799	16.4389	15.3846	16.7312
130	16.2831	20.8367	19.7284	19.1088	19.1532	19.6338	18.1624	18.7613	17.2019	17.0194	17.2906	17.6878	16.1833	19.0453
140	16.8256	21.8402	18.2197	18.2846	18.838	18.8588	19.243	18.5453	16.2449	17.8577	17.0096	18.5406	17.5218	19.4624
150	19.266	20.3024	18.6769	20.3092	21.453	17.5573	19.6795	17.1156	17.8278	17.6359	17.8011	17.1425	17.4472	18.716
160	18.0419	20.2034	19.0833	19.4021	19.6483	15.1718	17.6684	17.6791	17.5374	17.4162	16.1165	17.1695	16.6859	17.4776
170	19.322	21.2333	20.1729	19.1848	19.166	14.9047	18.5154	17.8098	17.6385		17.2229	16.5152	17.1594	15.7021
180	16.8205	19.3816	18.2573	20.2207	19.5325	15.6673	17.2053	16.6912	17.0036		16.1893	17.4662	17.64	15.3938
190	18.7793	19.3752	19.7951	17.7355	19.3316	13.7835	17.0547	17.1047	16.7739		16.1141	15.7639	16.7111	15.1432
200	19.3669	19.0432	19.2415	18.0686	17.6265	13.7353	16.7684	15.5382	16.1677		16.5697	14.3479	15.835	15.4083
210	18.3615	16.9299	19.6887	18.1991	19.6665	16.0823	15.716	17.9964	16.4543		17.2006	13.5912	15.2669	16.2229
220	18.1784	16.7902	19.3799	19.9254	17.7684	16.1432	18.0224		16.618		16.4043	13.0917	16.1406	14.8423
230	19.0378	19.5729	19.0801	16.5085	17.1748	15.7258	17.1662		14.9669		16.2474	15.3267	15.9041	17.0626
240	18.5462	15.81	15.7368	15.8397	16.9827	15.0303	16.6325	15.6987	13.5788		15.613	15.0122	15.7867
250		17.2058	15.38		16.2519	17.5654	15.6917	16.3694			13.8675	15.7135	15.6115
260		17.26	14.6861		17.0994		16.9291	13.4479	18.9015		16.4752	16.0256	12.6085
270		15.3906	16.2239		15.4571	17.9538		14.7049	16.3024		15.7265	17.0686	13.419
280		15.8436	16.5857		16.565	16.8816		14.109	16.1165		16.3694	17.2667	15.0303
290		16.4323			16.6885	14.7498			19.1511		16.1547		15.5998
300		15.9671			17.7363	16.0953		16.7227	18.3959		16.5857		13.9152
310		18.5737			16.8628	15.8077		14.297	16.8479		17.3197		14.4748
320		19.7427			18.4207	16.0314		14.4323	12.187		16.8261		14.1607
330		16.7622			16.8857	17.4128		14.965					14.7991
340					15.4793								13.8756
350													14.5079
360
370
380
390
400
