# Supplementary material for: BUB-1 promotes amphitelic chromosome biorientation via multiple activities at the kinetochore
Source: eLife journal article supplement (doi:10.7554/elife.40690), 2018-12-14
Supplement: supp [file elife-40690-supp-v1.zip › elife_poa_e40690_Figure_1_source_data_1.xlsx]

## Sheet: Pole_distances_Control
time from nebd (s)	embryo_1	embryo_2	embryo_3	embryo_4	embryo_5	embryo_6	embryo_7	embryo_8	embryo_9	embryo_10	embryo_11	embryo_12	embryo_13	embryo_14	embryo_15	embryo_16	embryo_17	embryo_18	embryo_19	embryo_20	embryo_21	embryo_22	embryo_23	embryo_24	embryo_25	embryo_26	embryo_27	embryo_28	embryo_29	embryo_30
0	7.63166	11.4081			11.1152	10.1432	12.4444	10.8004		12.1765	11.7394	12.5606	12.4368	11.8428	13.1956	10.1969	10.2903	12.5169	12.5732	10.0536
10	9.06417	11.4043		9.82891	11.522	10.362	12.5784	11.6001	9.56774	12.6958	11.8344	12.0748	12.8334	12.4379	12.9795	10.2947	10.8261	12.8527	12.2153	10.686
20	10.1969	11.8925		10.2168	11.4382	10.2212	12.2823	11.449	10.7805	12.5866	12.1775	11.9536	13.0639	12.6351	13.1725	10.2718	11.0061	12.9987	12.8742	10.8602
30	11.0625	12.3289		10.8794	11.4512	9.6594	12.5237	11.4237	10.8122	12.8155	12.6894	12.3272	12.7896	12.1867	14.1208	10.4786	11.3011	12.8788	12.8517	10.969
40	10.9205	12.4978		10.8407	11.7084	9.85933	12.6412	11.1172	10.9096	12.2123	12.9859	12.6462	12.9516	12.0844	13.606	10.7652	11.1246	13.4045	13.1801	10.7135
50	11.6801	12.5847		11.7052	12.114	10.043	12.2925	10.66	10.872	11.9081	13.2776	12.5079	13.1263	12.1523	13.3776	11.1592	11.6193	13.5663	12.786	11.1372
60	11.454	12.2998		11.6881	11.9727	9.92754	11.6929	10.9747	11.0051	12.4186	12.9737	12.5315	12.5483	12.2346	12.7668	11.308	11.6466	13.0281	12.5	11.718
70	11.8776	11.5152		11.6024	12.1528	9.90546	11.8902	11.0494	10.6083	12.6713	13.1234	12.3496	12.5972	12.4503	12.7417	11.9773	12.2249	13.0593	12.1189	11.9215
80	11.8775	11.3532		11.3512	11.832	10.5239	12.0191	11.1059	10.9971	13.0296	13.5076	12.4486	12.5992	12.3922	12.4852	12.4304	12.2149	13.0686	12.0294	12.3124
90	11.2825	11.5752		11.8994	12.1506	11.2001	11.9548	11.3727	11.2839	13.5346	13.9641	12.9577	12.821		12.6485	12.7359	12.2319	13.628	12.0382	12.6051
100	11.2261	11.9634		11.7018	12.987	11.7979	12.123	11.7219	11.5798	13.6472	14.3083	13.0902	13.2663	13.0556	12.9135	13.4121	12.1933	14.1101	12.4977	12.7494
110	11.3599	12.249		12.0947	13.1636	12.1614	12.5364	12.0933	12.071	14.0656	14.4357	13.4795	13.6632	13.2525	13.3207	13.5845	12.1586	14.2648	12.8689	12.8701
120	11.8072	12.9652		12.2309	13.6313	12.8768	13.176	12.1038	12.3845	14.029	14.3791	13.7615	13.9992	13.5952	13.7509	13.9492	12.0455	14.4064	13.4649	13.0604
130	12.8394	13.6177		12.6809	14.1509	13.3595	13.591	12.5883	12.7248	14.5047	14.6879	14.0513	14.5391	13.9447	14.1605	15.2656	12.2075	15.0468	13.4342	13.2328
140	13.102	14.2609		12.9985	14.498	13.5412	13.8967	13.0136	12.8987	15.524	14.8947	14.3719	15.783	15.3508	14.7205	16.2516	12.5844	15.6601	13.9665	14.024
150	13.3069	14.7228		13.3869	14.7697	14.198	14.3914	13.7584	12.9785	16.5037	15.662	14.9903	16.8099	16.1148	15.7191	17.196	13.8516	17.1228	15.4461	14.9983
160	13.629	15.8333		13.8526	15.7129	15.378	15.2727	14.8541	13.4853	16.9774	16.9563	16.183	17.5493	16.6102	16.7043	17.4307	15.1335		16.5941	15.749
170	14.103	16.9565		14.9329	16.5482	15.9898	16.045	15.7072	13.876	17.6074	17.78	17.0213		17.177	17.5686	17.9805	16.196	18.7102	16.9971	16.3905
180	14.6704	17.6185		15.8433	17.8011	16.8116	17.0402	16.32			18.7357	17.9123	18.7214	17.8411	18.4881	18.8735	16.6124	19.4112	18.3126	16.8622
190	16.063	18.7205		16.5386	18.5333		17.8705	16.7651	14.7399	18.9175	19.2416	18.3527	19.2657	18.2833	18.9187	18.8477	17.3489	20.0752	18.5279	17.2942
200	16.6574	19.362		17.1158	19.4874	18.3576	18.3448	17.412			19.8808	18.8203	19.8731	18.9103	19.7054	19.4835	17.9171	20.4681	19.4761	17.9479
210	17.8189	19.6409		18.1818	19.9796	19.0293	19.0247	17.9154	16.5585	20.3347	20.0599	18.8621	20.298	19.2557	20.0637	19.8378	18.3404	20.6928	19.8722	18.1984
220	18.3144	20.1956		18.6862	20.594	19.506	19.6207	18.295		20.0672	20.8521	19.5996	20.5094	19.7687	20.8129	19.7835	19.0827	21.3612	20.1295	18.6783
230	18.9974	20.6736		19.3261	20.7499	20.0531		18.5403	17.5661		21.2004	19.7628	20.9198	20.4475	21.0648		19.4315	21.3376	20.7411	18.5857
240		20.7147		19.882	21.223	20.2719	20.2379	18.9727	18.3936		21.4799	20.0335	21.1087	20.7388	21.293		20.134	21.7114	20.8964	19.1736
250		20.5851		20.2268	21.121	20.8012	20.4579	19.5271	18.7425			19.8891			21.724		20.134
260		20.8048		20.5423		21.0802		19.844	18.8871
270		21.084		20.9928		21.2066		19.8276	18.8142
280		21.1499						20.3482	19.742
290
300
310
320
330
340
350
360
370
380
390

## Sheet: Pole_distances_bub-1
time from nebd (s)	embryo_1	embryo_2	embryo_3	embryo_4	embryo_5	embryo_6	embryo_7	embryo_8	embryo_9	embryo_10	embryo_11	embryo_12	embryo_13	embryo_14	embryo_15	embryo_16	embryo_17	embryo_18	embryo_19	embryo_20	embryo_21	embryo_22	embryo_23	embryo_24	embryo_25	embryo_26	embryo_27	embryo_28	embryo_29	embryo_30
0	11.6433	10.5951	12.5289	10.6383	11.8948	11.428		11.2588	9.27198			10.1362	11.9034	12.283	9.94093	12.4413	10.8889		10.9492	8.08018	9.80454	10.853
10	11.4358	11.0202	12.4935	11.4027	12.2691	11.8139		11.4996	9.27334			10.4968	12.0093	12.5503	10.3482	11.0888	11.5295	11.9625	11.0871	8.52808	10.1007	10.921
20	11.4538	11.8259	11.6083	11.8441	11.8093	11.7578		11.8486	9.94117	11.691	11.7473	10.9758	11.9088	13.3595	10.9013		10.9741	11.6845	11.1145	9.40046	10.5605	10.5666
30	11.3374	12.4026	12.1279	12.4987	11.6758	12.2293		12.2142	10.3932	12.3181	11.9775	11.1315	11.9583	13.0287	11.4485	11.7446	11.4438		11.4634	10.1213	11.2185	11.1384
40	12.3691	13.3782	12.9037	13.681	11.5815	11.7432	7.80931	12.3449	11.1672	12.8922	12.7462	12.2113	11.7054	13.3151	11.8067	11.8215		13.1399	12.0572	11.3698	11.7656	11.4258
50	12.3419	14.0297	13.8526	14.5845	11.8074	12.0877	8.62231	12.1893	11.1986	13.4604	13.1637	12.4711		13.4277	12.292	12.067		13.9338	12.0148	12.3293	12.7133	11.3582
60	13.3497	14.6919	14.6772	15.2757	12.3873	11.8317	9.72284	13.3556	11.8234		13.9829	12.9556	12.2417	14.0896	12.5675	12.0416		14.7071	12.9642	13.5549	13.4487	12.3296
70	14.2004	15.4701	15.4452	16.3414	12.8567	12.3194	10.8779	13.9395	12.4096	14.324	14.7295	13.0963			12.5136	12.203	12.6726	15.4721	13.5237	14.2036	14.0279	12.9753
80	15.1501	16.1361	16.0055	17.0583	13.6501	12.8341	12.1162	14.7077	13.1507	14.4904	15.1815	13.3121	13.0339	15.0381	12.9825			16.1415	14.5063	15.5486	14.3238	13.6471
90	15.9313	16.8203	16.5757	17.8302	14.4527	13.6933	12.8412	14.9705	14.1515	14.3601	15.5354	12.9668	12.9653	15.4721	12.8241	13.3895	13.6371	16.8059	15.4436	15.9924	14.1028	13.6718
100	16.4609	16.9852	16.5528	18.1365	15.158	14.7653	13.9375	14.8907	14.6575	14.2571	15.7343	12.6556	12.6153	15.5148	12.9283	14.2078	14.3845	17.1822	16.1456	16.506	13.555	13.7188
110	17.0221	16.9821	16.1112	18.2486	15.741	15.4733	14.9909	15.1369	15.1671	13.8536	15.6972	12.3264	12.8345	15.4083	12.5484		14.1713	17.1874	16.8583	16.3276	13.5985	13.6477
120	16.7998	16.6089	15.725	17.7983	16.0654	15.6744	16.053	14.7688	14.8204	13.2938	15.1782	12.1091		15.2775	13.1937	15.3516	14.1551	16.5087	17.0491	16.295	13.083	13.4023
130	16.7118	15.6024	14.8095	17.2599	16.1302	16.5503	16.0185	14.0538	14.8413	13.24	14.2045	12.2717	12.8335	15.0831	13.3698	15.2706	14.076	15.5814	16.5809	15.6923	12.485	13.0691
140	16.3154	15.0004	14.3457	16.4657	15.5415	16.3278	16.4767	13.6558	14.1293	12.9328	13.7242	11.9871		14.8722	13.9193	15.347		15.0961	16.1843	15.0418	12.867	12.6178
150	15.6219	14.6033	14.2407	15.8709	15.1387	16.2359	16.0359	13.1224	14.0597	12.8096	13.5716	11.9422	12.337	14.8497	14.2021	14.7496	13.8952	14.4308	15.7035	14.5253	12.6969	12.7709
160	15.391	14.4388	14.0617	15.1546	14.3883	15.9129	15.6978	12.8883	13.4115	13.0018	13.5722	11.8954	12.645	14.7813	14.0752	14.2437	13.9261	14.4343	14.9324	14.3124	12.715	12.3266
170	14.6859	14.969	14.1923	15.0577	13.7391	15.4078	15.2274	12.7266	13.3061	13.3873	14.3888	12.3288	12.8255	14.7136	14.4099	14.3236	13.4796	14.2761	14.1587	13.8521	12.5814	12.397
180	14.2507	14.5407	14.3085	15.0421	13.571	14.9115	14.8788	13.0171	13.339	13.6881	14.3302	12.1245	12.5062	14.7877	14.7679	13.9522	13.5771	14.5128	14.0412	14.0457	12.689	12.0551
190	14.2081	14.8035	14.5675	15.1838	13.8014	14.2308	14.4679	12.8995	13.3708	14.0109	15.1844	12.414	12.9364	14.7975	14.9206	13.8638	13.4855	14.1933	14.0595	14.567	12.7847	11.8476
200	14.1529		14.9126	15.2551	13.6404	14.1604	14.2271	13.1985	13.3001	15.4481	16.0699	12.2986	12.7436	15.9096	15.0397	13.8619	13.8961	14.8854	14.4969	16.3423	13.4316	12.7111
210	14.6746	15.566	15.0244	15.4229	14.0314	14.1357	14.1757	13.8013	13.5705	16.8751	18.1403	12.5753	12.7044	16.8121	14.8832	13.9976	14.4007	15.7003	14.7498	17.1808	13.5296	12.8282
220	15.3846		15.8014	15.5649	14.4132	14.5957	14.4324	14.3552	13.4396		19.2972	13.5045	12.8766	18.3699	15.061	14.097	14.8472	16.9792	14.8514	19.2039	16.047	13.0504
230		18.9173	17.4972	16.9679	14.6752	14.8427	14.3312	15.3812	13.897	18.7841	19.6286	17.2028	12.7897	19.4503	14.6907	14.5154	17.1703	18.4681	16.7002	19.5757	16.8602	13.3453
240	18.1097	20.6955		16.8415	15.3061	15.5392	15.0905	17.4721	13.4509	19.9419	20.5992	20.879	13.4557	20.6624	15.0092	14.77	19.5712	18.8698	17.5643	19.6531	18.2223	15.5568
250		21.4469	21.6681	19.1702	16.5258	16.1198	16.3132	19.155	14.3024	20.3364	21.34	22.0612	15.5818	21.1537	15.341	15.247	20.1973	20.2875	18.4218	20.3409	19.5588	17.7404
260	19.6038	22.3399	22.3278	19.5503	18.1217	16.7061	16.9495	20.326	16.2269	20.9151	21.6843	22.7598	21.4315	21.8026	15.8114	17.383	21.9385	20.8794	19.4481	20.9795	19.9603	19.2175
270	19.6884	22.7223	22.8156	20.1799	18.9996	17.8021	18.3412	21.7624	18.3329	21.4654	21.676	23.7693	26.0305	21.9088	17.3625	19.2004	21.7754	21.0263	19.9055	21.2719	20.9908	19.615
280	20.6072	23.2253	23.1806	21.1353	20.0502	17.7296	19.2658	22.3672	19.6553	21.3942	22.2725	23.6552	26.8028	22.2946	19.7387	21.3396	23.047	21.6377	20.4762	21.5842	21.3867	20.6619
290	20.7722	22.9839	23.4096	21.232	20.4943	18.1247	19.949	23.0221	20.7533	21.5235	22.2524	24.013	27.414	22.4062	20.6771	21.6572	23.1192	21.5631	20.9067	22.0965	21.9577	21.4013
300	21.0559	22.8801	22.9528	21.8429	21.0318	18.2509	20.3961	23.4664	21.3685	21.7294	21.7354	24.0025	27.7275	22.7898	22.0392		23.364	21.8728	21.2846	22.7386	21.9753	21.3435
310	21.3839	23.2645	23.1565	22.1424	21.4814	18.6141	20.9099	23.5643	21.5193	22.0186	22.0843	24.0486	27.3814	22.8684	22.5002	23.6316	23.0615	22.0765	21.2041	22.3554	22.5442	21.7942
320	21.1855	23.1269	23.6053	22.3265	21.6089	19.3463	21.5118	23.9037	22.2243	22.0186		24.0901	27.4431	23.1937	22.8307	24.0447	22.9726	22.2781	21.4394		22.7526	21.6203
330	21.7712	22.8418	23.1558	22.9348	21.8187	19.9551	21.9048	23.9745	22.7346			23.617	27.5216	23.2783	23.4977	24.0844	23.4331	22.7012	21.5483			21.9382
340					21.9234	20.2511	22.3145	24.1575	22.8416				27.5534	23.1433	23.4796	24.1501		22.9943	22.0032			22.1257
350					21.8398	20.9764	22.4525	24.2599	23.3159				27.159	22.1774	23.6884	23.9666
360					22.0157		22.4142	24.4085	23.1747				26.8765	23.7919	23.5459	23.7634
370					22.3378			24.3203						24.2036	23.5332	23.8731
380					21.8018									24.1439	23.6532	24.4864
390					22.0381											24.2865
					21.6974											24.1684
					22.1437			23.0292								23.8185
								23.8898								23.5913
								22.9127
					21.2836
					21.9584

## Sheet: Pole_Distances_cls-2
time from nebd (s)	embryo_1	embryo_2	embryo_3	embryo_4	embryo_5	embryo_6	embryo_7	embryo_8	embryo_9	embryo_10	embryo_11	embryo_12	embryo_13	embryo_14	embryo_15	embryo_16	embryo_17	embryo_18	embryo_19	embryo_20	embryo_21	embryo_22	embryo_23	embryo_24	embryo_25	embryo_26	embryo_27	embryo_28	embryo_29	embryo_30
0		12.2314		9.43643	11.191	11.192	11.1174		12.1806	8.64549	10.6674	11.9506	12.5249	10.948	9.58005
10		12.3282	15.2427	9.79154	11.427	11.0438	11.3743		12.5768	8.95764	10.8802	12.0454	13.1187	11.389	10.3269
20	11.8876	12.0337	14.7042	9.88321	11.3151	11.2415	11.2087	7.46598	12.7566	9.69793	10.8754	12.0088	12.6349	11.7588	10.9468
30	13.7951	11.6973	14.6038	9.69387	10.3834	11.6133	11.1489	7.72092	12.7163	9.5862	11.1955	12.8634	14.0649	11.9009	11.4496
40	14.3367	12.1387	14.3524	9.6183	10.0668	11.7444	11.9478	8.60067	12.4745	10.0381	11.5635	13.1238	14.4573	11.8186	11.4271
50	14.4607	12.2653	14.9967	10.8053	11.3165	12.165	12.136	9.11126	14.0774	9.85648	11.8522	13.7227	14.9799	12.0523	12.228
60	15.5897	12.7334	15.3281	10.9849	11.8201	12.1402	11.583	9.96829	14.7419	10.3076	12.2325	14.4536	15.5866	11.6459	12.7252
70	16.0907	12.3185	15.574	11.778	11.945	12.0477	12.1485	10.8444	16.0087	10.4111	11.7684	14.4816	16.1381	10.768	12.3967
80	16.5131	12.1565	15.5623	13.5627	13.0582	11.8733	12.829	12.032	17.8511	10.3999	12.74	15.3257	17.5684	9.76071	12.2845
90	16.7346	13.1562	16.206	15.0661	14.6344	13.4599	14.3358	13.4648	19.7926	11.0737	13.4353	16.9619	19.7353	13.2203	13.3866
100	17.8482	14.2121	16.5507	18.3066	16.7588	15.117	14.062	15.9413	22.8334	9.83403	14.0895	17.8878	22.3843	15.5475	14.7027
110	19.2373	14.5334	17.0829	21.1556	19.3039	17.997	14.6596	17.7976	24.4631	10.7633	15.1823	20.5326	24.6203	17.9527	16.5256
120	19.3909	16.7434	17.5675	23.825	22.7995	18.4401	16.1993	21.2866	27.0322	12.7735	16.6606	21.1314	24.9661	20.6418	18.9791
130	19.1877	18.7578	18.417	24.1159	21.4772	19.5846	19.375	22.5953		15.2551	17.7222	22.5034	25.753	21.4087	19.5884
140	19.9676	20.6814	20.13	24.4681	22.7153	19.7794	21.5628	22.9807	25.063	17.9713	18.7069	22.6387	26.9767	21.4524	21.2015
150	19.6176	21.8126	20.6214	24.2702	21.1852	20.1522	22.2058	22.8419	24.1617	19.9325	19.4161	22.8805	26.815	21.9371	21.2124
160	21.6582	22.021	20.7581	23.9632	22.3513	19.8595	23.1374	22.7094		21.6111	20.5834	22.9839	27.0204	22.8726	22.0923
170	21.8129		21.9679	23.7849	22.1847	20.187	23.6339	24.0086	23.6637	23.1465	21.0223	23.3169		23.3388	21.4732
180	22.5353	21.5221	21.3076	22.3733	23.4338	20.5703	24.8572	22.6779	24.5721	23.7781	21.503	23.374	27.3643	24.6248	21.4618
190	22.4469	21.2855	20.1865	22.5279	24.1731	20.914	24.1841	22.7613	24.3788	23.6463	21.9516	23.0993		23.0411	21.4601
200	23.1789	20.8678	19.1621	22.9742	23.848	21.1049	24.5408	21.6913		24.3079	21.9301	24.3056	27.8487	22.8332	21.6776
210	23.2216		20.2745	21.6959	23.2418	22.1073	24.356	22.9081	24.7538	23.6441	21.5803	23.8535	28.8427	23.0258	22.394
220	23.3809	21.6935	20.45	22.1864	24.5269	22.0464	23.1182	22.7146	25.6545	23.3484	22.4102	24.6592	28.5348	20.9212	21.0375
230	23.5772	22.7578	20.7922	22.8033	23.2623	22.6287	24.7978	22.9292	26.0297	23.1112	22.2972	24.8928	29.7151	23.3487	22.6564
240		21.8104	21.2459	22.3172	24.0316	22.4532	22.5828	23.6758		21.8337	23.8263	24.3505	28.9983		21.6865
250	24.7195	21.7158	21.2323	21.6145	24.1294	22.2334	24.704	24.5035		22.237	23.6085	24.2893	29.1981	23.5129	22.2078
260	24.5709	21.3974		20.7581	23.4229	22.4965	23.3033	23.8226			24.8834	24.6653	28.0748	24.4133	22.5401
270	25.3812	21.4281		21.583		21.7332	25.5588	23.0985			23.7958		28.4878	24.1334	23.493
280	24.9652	21.7403		21.5681	22.8566		25.8958	23.4246			24.4172		27.9333	24.6692	23.6606
290	24.4137	21.8216		20.905	22.513		26.4231	23.1992			22.8905			24.7594
300	24.8346	22.1011		21.2951				22.6392			22.2488			23.2656
310	23.6974	21.9711		21.8032			26.3562	23.1288			21.5163			24.0948
320	24.2647			21.8025			26.4518	23.2014			21.3456			23.9577
330	24.6961			21.8263				22.8501						23.3553
340	24.4591			21.845				23.6442			22.4876			23.4045
350	23.1858						26.1765				21.9787			22.9262
360
370
380
390

## Sheet: Pole_Distances_hcp-12
time from nebd (s)	embryo_1	embryo_2	embryo_3	embryo_4	embryo_5	embryo_6	embryo_7	embryo_8	embryo_9	embryo_10	embryo_11	embryo_12	embryo_13	embryo_14	embryo_15	embryo_16	embryo_17	embryo_18	embryo_19	embryo_20	embryo_21	embryo_22	embryo_23	embryo_24	embryo_25	embryo_26	embryo_27	embryo_28	embryo_29	embryo_30
0		10.4744	10.8237	11.1359	11.5213	6.66469	11.8609	11.5676	10.1163	10.3293	11.8365	9.15779	13.0127	8.82833	9.04732	11.3978		11.5834	11.6657	10.8497	11.1504	11.8865
10		10.9464	10.599	11.3283	10.7345	7.34422	11.8199	11.9896	11.0398	10.3375	12.1704	9.2675	13.5808	10.21	8.27722	11.645		11.7123	11.9737	10.8225	10.998	11.8141
20	10.9797	11.3719	11.382	11.3015	11.1112	7.998	12.1458	11.536	11.3248	10.2737	12.1608	10.1713	13.2655	10.2612	8.17738	11.8389	7.30545	12.3123	11.6703	10.8492	11.0532	11.6231
30	11.7339	11.8547	11.4987	11.2274	11.2946	8.5043	12.5351	11.7569	11.9357	10.3959	11.9538	9.43554	13.0985	10.9797	8.98007	12.1193	7.5843	12.6234	12.1073	10.5071	11.4976	11.6771
40	11.4735	11.9011	11.4202	11.4755	11.4464	9.75605	13.1659	12.3334	12.7228	10.5855	12.3235	9.8058	13.4474	11.4534	9.21794	12.3192	7.56025	13.1489	11.9252	10.7586	11.6717	11.7498
50	12.9439	12.6474	11.6851	11.9514	11.8601	11.4566	13.8512	12.5994	13.2876	11.0883	12.4316	9.68449	13.9672	12.2652	9.63433	12.7424	8.07042	13.7103	12.1533	10.8923	11.8232	11.9688
60	12.8368	13.584	11.9056	12.5632	12.3421	12.9354	14.4883	13.4349	13.4888	11.5617	12.2831	10.1017	14.8229	13.2861	10.1036	12.9887	8.91721	14.1328	12.2239	10.8659	11.9522	12.5659
70	13.6688	14.3757	12.7606	13.6705	13.0397	14.8827	14.7195	13.9547	15.4573	12.6881	12.7501	11.1074	14.5798	14.3359	10.9284	13.2449	10.0234	14.9171	12.9077	11.3912	11.8725	13.3548
80	14.4868	16.4995	13.5917	15.1914	13.3002	17.3543	15.8621	14.6085	17.3066	14.2378	13.5357	12.0998	15.6279	15.1346	11.5854	13.8255	10.7232	15.8838	13.1858	11.7923	12.8897	15.008
90	15.4103	19.0385	14.3096	16.3399	15.0384	20.2135	17.5092	14.6217	18.768	17.7383	14.2044	13.3932	17.5313	16.8661	13.335	15.1404	12.2955	18.4731	13.7053	13.0422	13.745	18.0021
100	17.3446	20.2462	14.8715	19.1252	17.0989	21.8522	19.6348	16.4405	20.3451	19.4964	15.8818	14.7484	19.4815	19.6373	15.2244	17.634	13.6203	20.5714	14.5296	15.0558	15.723	20.231
110	18.9285	21.6173	16.4371	20.0603	19.1817	23.6458	21.39	19.3041	21.2384	20.4381	17.114	18.0167	20.7385	20.7228	19.7083	20.2756	16.1561	21.5988	15.6809	17.7966	16.8819	22.687
120	20.2037	23.7055	18.3213	21.223	20.9004	24.2869	23.3834	19.5543	21.9088	21.4123	17.4618	22.1038	20.3638	22.4123	21.914	20.133	18.1834	22.3022	17.1074	20.71	18.732	23.6497
130	21.598	23.8011	18.6239	22.8049	22.5247	25.4216	25.1365	21.1457	22.324	21.6881	19.5461	25.0968	23.2218	23.395	23.1341	22.0555	20.5005	23.13	19.03	22.0678	19.7933	26.1368
140	23.8503	24.6568	20.3856	23.581	22.7368	24.8328	25.9632	21.5938	22.8394	22.2612	21.3622	25.7868	23.6068	23.7335	23.6295	24.1315	21.9671	22.8715	20.607	23.4454	20.8058	26.7862
150	23.8672	24.5172	21.7622	23.9285	23.5822	24.7961	26.9614	23.3502	22.8729	22.1722	21.6282	25.9999	23.1046	25.0687	23.492	24.9618	23.0424	23.526	21.042	23.392	21.6169	27.5258
160	24.4217	25.097	21.5612	23.8315	23.9341	24.6763	27.4422	22.7079	23.4214	22.3908	23.0499	25.9613	23.9231	24.3903	24.201	24.1537	23.6867	23.5749	20.9982	23.2551	22.0833	27.9206
170	23.5937	24.6363	21.7867	23.391	23.5644	23.7874	27.3641	22.6416	22.7883	22.5114	23.5536	25.5212	24.0934	23.6114	23.8623	23.9969	23.4391	23.191	21.4037	22.8909	22.3234	27.098
180	23.7606	25.191	22.1458	23.5788	23.021	24.2433	27.1036	22.0831	22.2462	22.2333	24.4876	25.3023	23.8074	22.8388	24.2193	23.2585	23.0654	22.9927	22.0842	23.1815	21.8017	26.9023
190	23.7504	24.6896	21.2936	23.1924		24.0314	27.5178	21.2231	23.5325		25.6668	25.3331	23.6121	21.6348	23.6295	25.049	23.7556	22.1837	21.4474	22.8073	22.1566	26.5424
200	22.8168		22.2002	23.8573			26.6946	21.8686			25.944		23.1378	22.3799	22.8345	22.4051	23.3493	21.3785	20.3722	22.6925	22.1548	26.5855
210	22.6922		21.2778	23.8077			26.8748	21.9858			25.923		22.6212	21.1842	22.8539	24.1275	23.2371		21.286	22.6052	22.5472	26.2558
220	21.1296		21.8852	22.6456							25.3203		22.1926		22.8505	23.724	23.5642		21.9978	22.7946	23.0327	25.6685
230	21.0987			23.0662							25.6431		22.0346		23.136	23.7922	23.1951		21.783		22.5594	25.7265
240	19.6733		20.9597	22.1564							24.3251		22.509		22.7344		22.7869		21.1305		22.6944	25.3889
250	20.6315		20.3704	22.5924							24.4719		22.259		22.4356		23.025		20.8156		22.6322	24.792
260	20.9987			21.988									22.6297		21.9377		22.3995		20.6333		22.1242	25.2129
270	21.2332		21.1558	21.8912									23.4267		21.9554		22.4372		21.1627		22.1553	25.4554
280	22.0521		21.5151	22.2514									23.6439		21.5106		22.0452		21.5727		22.3717	24.7867
290	22.833												23.5324		22.0097		21.4074		21.1125		21.5952	23.9758
300	23.2756		22.7184										24.3173		21.999				21.3259		21.8853	24.183
310	23.7723		22.6089										23.6595		22.8193				20.3212		20.3971	24.9769
320	23.5798		22.5341										23.6233
330			23.1665
340	22.7918		22.5244
350
360
370
380
390

## Sheet: Pole_Distances_cls-2+bub-1
time from nebd (s)	embryo_1	embryo_2	embryo_3	embryo_4	embryo_5	embryo_6	embryo_7	embryo_8	embryo_9	embryo_10	embryo_11	embryo_12	embryo_13	embryo_14	embryo_15	embryo_16	embryo_17	embryo_18	embryo_19	embryo_20	embryo_21	embryo_22	embryo_23	embryo_24	embryo_25	embryo_26	embryo_27	embryo_28	embryo_29	embryo_30
0	11.0423	11.3336	11.232		13.2296	10.2144	10.738	10.9885	9.56838		8.01404	10.7418
10	10.8291	11.6227	10.6419		13.1013	10.4418	10.9647	10.9424	10.1055			10.9985
20	10.4637	11.5296	11.0081		13.0908	10.2856	11.0934	11.3854	10.0765		12.2779	11.2476
30	10.8502	12.3851	11.4022		13.0678	10.7991	11.156	11.7643	10.1174		12.506	11.1208
40	10.5088	12.7971	11.5933		13.2387	10.5041	10.9095	12.0802	10.4154		12.0617	11.4708
50	11.3268	13.2484	12.1015		13.1965	10.8335	10.9855	12.7817	10.105			11.365
60	11.3125	14.0015	12.1136		13.2192	11.3719	11.5076	13.0374	10.4357			11.3438
70	11.6576	14.0757	12.3272		12.6197	12.0676	12.0116	13.619	10.6418		12.9991	12.3287
80	12.5385	14.836	12.6165		13.2713	12.5193	11.9665	14.4009	11.3973		12.9318	12.3938
90	12.7919	15.233	13.452		12.737	13.2762	12.5151	15.6645	11.5489		12.9207	12.8894
100	13.2195	15.6098	14.2775		13.0666	13.5602	13.0607	16.2213	11.5411		13.6162	13.0373
110	13.8739	15.4931	14.8017		12.7066	13.7151	12.4362	16.7085	11.9863		13.7576	13.3853
120	14.4697	15.8663	14.6763		12.6671	14.2225	12.559	16.7084	12.1622		13.9471	13.1263
130	14.2472	16.2238	14.2466		13.3304	13.7673	12.5486	16.3557	10.9246		13.9142	13.3579
140	14.0665	15.858	13.4089		13.3738	13.7295	11.6922	15.204	11.4178		13.4865	13.8301
150	13.5152	15.2995	12.5749		13.592	13.7958	11.1063	14.6004	12.2197		13.4009	13.3816
160	12.95	15.0474	11.4852		13.5789	13.333	11.3888	13.8359	11.7744		13.256	12.711
170	12.2012	14.4858	11.4629		13.2284	12.7222	11.9159	13.5291	12.224		12.9767	12.0486
180	11.7129	14.5464	11.622		12.6274	13.2685	12.2464	13.2844	12.044		13.3562	11.9726
190	12.1317	14.2665	11.6562		12.0673	13.6462	12.5419	13.5692	10.7123		13.3664	11.9665
200	12.6022	14.4783	12.0339		12.3672	13.8764	12.3929	13.6333	10.8838		13.6265	12.6168
210	13.3009	14.8959	12.5417		12.3994		13.3384	13.6625	11.4088		14.0581	12.866
220	13.6958	15.804	13.1247		12.0924	15.4727	14.0023	14.3725	11.9509		14.513	13.3337
230	13.8988	16.2706			11.9989	15.9487	15.0039	15.0796	12.7188		15.0824	14.2643
240	14.9453	17.1676			12.174	17.1817	15.7231	16.5218	13.2262		15.5276	15.1719
250	15.8675	18.3798			12.8202	17.6649	15.8328	17.499	13.9447		16.5431	15.8761
260	17.1193	19.3579	17.3849		13.5369	18.1144	17.0863	18.462	14.9292		17.0514	17.0314
270	18.1349	19.3697			14.587	18.2571	17.2918	19.2234	15.5951		18.5864	17.5045
280	18.3252				15.5705	18.7964	17.5761	20.0582	16.7611		18.6297	17.9089
290	19.4976	19.5557	19.3773		16.4585	18.8949	17.6562	20.7255	16.0557		19.978	17.5511
300	19.1931	19.9491			17.1388	18.725	16.6776	21.2988	17.2581		20.7153	17.7289
310	20.1898	19.825			17.4827	19.1	18.1475	20.7436	17.6943		21.0919	16.665
320		19.7761	19.8589		18.0466	19.2219	18.5222	21.4561	18.4663		20.4289	16.4809
330	21.1631	20.3537	20.5733		18.6924	19.3224	18.4029	21.8528	18.6953		21.1907	16.9793
340	21.3972	21.0387	20.6704		19.0792	19.7673	19.1487	22.2296	19.0046		21.1002	17.0678
350	21.3713	21.7279	21.2643		19.3707	20.3286	19.6022	21.9703	19.2668		21.8018	16.7675
360	21.6574		21.2762		20.2246	20.2444	20.0703		19.6769		21.4779	17.0329
370			21.7889		20.1167	21.0261	20.5317		19.62		22.4564	17.5042
380			22.1119		20.1693	21.2839	21.1492		19.7742		22.4788
390	22.3266	22.8442			20.5949		21.6641		20.3497		22.7614
	22.7023				20.6348		22.0486		20.5678		22.1747
	22.0782				21.2327				20.8574		22.311
	22.564	23.1571			21.6398				21.421		21.2148
	21.9354								21.24		21.5365
	21.5586										20.8457
	21.3211										20.8543
	20.9583

## Sheet: Pole_Distances_hcp-1+bub-1
time from nebd (s)	embryo_1	embryo_2	embryo_3	embryo_4	embryo_5	embryo_6	embryo_7	embryo_8	embryo_9	embryo_10	embryo_11	embryo_12	embryo_13	embryo_14	embryo_15	embryo_16	embryo_17	embryo_18	embryo_19	embryo_20	embryo_21	embryo_22	embryo_23	embryo_24	embryo_25	embryo_26	embryo_27	embryo_28	embryo_29	embryo_30
0	10.8905	8.15801	10.7849	8.85309		10.9872	10.8095	10.2963	11.0368	10.8241
10	11.2549	8.45343	11.0619	9.14211		11.0443	11.5958	11.1663	11.5461	11.3833
20	11.6722	8.52579	11.1507	9.10549	9.60892	11.3411	11.9971	11.3755	11.2578	11.4165	9.70189
30	11.6273	8.72805	11.0894	8.80446	9.89859	11.2334	11.5333	11.2208	10.7283	11.8996	10.167
40	12.2135	8.86976	10.9321	9.48044	10.4358	11.3519	11.6828	11.5011	11.0677	12.4984	10.5832
50	12.3402	9.51075	11.014	10.191	11.3897	12.9699	11.9139	12.1593	12.3067	13.4734	11.6204
60	12.829	10.0205	11.8955	11.9752	13.2908	15.1681	12.375	12.5938	13.7454	14.6597	12.8784
70	13.8873	12.1079	13.2337	13.1779	14.7615	15.3305	13.7253	13.5749	14.5342	16.0373	14.4095
80	14.274	13.2428	15.0955	15.3181	15.535	16.3452	14.8835	14.2022	15.5382	17.1109	15.5105
90	14.8017	14.9058	16.2255	16.4664	16.3573	16.7952	15.9578	15.3955	16.1544	17.6153	16.2381
100	16.3444	15.7787	17.2532	16.9269	16.4898	17.3705	16.7114	16.1639	16.503	17.7841	16.4187
110	16.2647	16.0354	17.7094	16.2165	17.0869	16.6049	16.4277	16.1488	16.3252	17.4383	16.6404
120	16.3731	15.7098	17.8849	15.754	16.9443	16.3278	15.7294	15.7677	16.0523	16.8716	16.1187
130	15.8468	15.1512	17.2756	15.3079	16.5176	15.0531	15.2641	15.4468	15.193	16.2228	15.6063
140	15.0085	15.0639	17.0809	14.6097	15.9504	15.003	14.9272	15.1231	14.732	15.6065	15.081
150	14.0556	14.2789	16.7099	13.9793	15.4231	14.6931	14.1363	14.7708	14.2837	14.8829	14.9722
160	13.5185	14.1694	16.0019	13.233	14.8173	14.0664	14.2063	14.3098	13.1867	14.5809	14.3569
170	13.44	13.6302	15.5546		15.2185	14.1983	14.2951	13.2222	13.7134	14.2429	13.8696
180	12.9732	13.3946	15.2795	13.5266	15.4296	13.4272	13.994	13.4562	13.5501	14.3667	13.779
190	12.6951		15.4464		15.3885	13.6612	13.7271	13.3612	12.9971	13.9953	13.7395
200	12.8639	12.9793	13.8592	14.0785	15.4699	13.411	13.6967	13.8383	12.5615	14.0561	13.8737
210	12.7502	13.9166	14.9378	14.1346		13.2481	13.9303	13.9177	13.8268	14.6499	14.3151
220	12.938	14.074	14.9201	14.7965	16.6632	14.61	14.4385	14.5627	14.4428	14.6155	14.5701
230	13.4637	15.5204	15.4179	16.1669		14.7817	14.9284	15.4375	15.2137	14.8755	15.0516
240	14.1711	15.7298	15.7503	16.6684	17.3126	16.4647	15.8581	16.5086	16.1312	15.5984	15.421
250	15.5051	17.5525	17.0019	18.2006		16.8544	16.4064	17.3444	17.2358	16.3435	16.6035
260	16.0368	17.9909	17.8125	19.1473	18.2394	18.276	17.2833	18.443	18.3376	17.277	17.4613
270	17.311	18.5619	18.6015	19.9264	19.185	19.1199	18.2975	19.4734	18.4831	19.375	18.1609
280	17.6277	19.4454	19.8485	20.8332	19.9928	19.7651	18.6928	20.2311	19.5593	19.6529	19.0284
290	18.8684	19.692	19.7477	20.8652	20.9489	20.4371	19.2753	20.4453	19.9587	20.7806	19.2369
300	19.3812	20.5868	20.8493	21.5583	21.3139	20.8748	19.9903	21.0793	20.7906	20.6214	20.0448
310	19.5381	21.8538	21.1627	21.9638	21.6963	21.2565	20.3368	21.3319	21.213	21.9412	20.538
320	20.0955		21.6384	22.5215	22.0604	22.1432	20.4403	21.5084	21.5678	22.3111	21.0163
330			22.1659	22.6966		22.314	20.5509	21.89		22.6416	21.4038
340			22.6036	23.1949		22.7981	20.9581	22.3961		22.8807
350
360
370
380
390

## Sheet: Chromosome_span_Control
time from nebd (s)	embryo_1	embryo_2	embryo_3	embryo_4	embryo_5	embryo_6	embryo_7	embryo_8	embryo_9	embryo_10	embryo_11	embryo_12	embryo_13	embryo_14	embryo_15	embryo_16	embryo_17	embryo_18	embryo_19	embryo_20
0	9.23205	6.9015			8.56154	6.63462	7.81047	7.46474	8.46645	6.09722	6.95769	7.09081	7.67543	6.5968	7.64637	3.75064	3.73056	8.20192	8.10876	4.63782
10	9.62692	7.30427		7.97778	8.27308	6.18013	7.54915	6.52051	7.06133	6.42521	6.46624	7.4485	7.2312	6.40342	7.28034	3.6797	3.60128	6.27137	7.51239	4.36795
20	8.93974	7.65791		6.18462	8.15833	6.51581	6.56239	5.41496	8.0156	6.19658	5.23825	6.63162	7.13355	6.32115	5.33376	3.56346	3.7515	6.19658	7.5515	5.13611
30	8.58312	8.40492		7.98996	6.77201	7.50064	6.95812	4.14081	7.39444	5.64124	5.64744	6.52265	5.54573	4.70641	6.87799	2.75983	3.02414	7.05449	6.91474	4.8938
40	6.72586	7.89316		5.30385	6.91218	6.0609	6.7859	5.16175	6.05791	5.46261	4.31667	6.59209	5.90021	5.55791	5.29423	3.37885	3.39744	4.55833	6.88077	3.58461
50	5.85598	8.28333		5.51068	6.75278	6.21774	6.72586	5.57286	5.27115	3.6797	3.27949	3.79316	4.22863	3.20961	5.13312	2.92244	3.41303	6.98034	5.83056	3.31709
60	5.98333	5.74102	8.63932	4.36389	6.63462	5.14786	5.09701	4.56068	5.06496	2.47244	4.61068	3.74893	3.63611	2.47009	4.69103	3.02607	3.39573	4.05983	4.81026	3.22479
70	6.77564	4.87671	7.54915	3.56987	7.45278	3.95855	5.07094	4.57286	5.275	2.87479	3.68867	3.4391	3.20919	2.43675	5.32094	3.39231	2.68846	4.06538	3.53697	2.96838
80	5.76923	4.49786	8.07393	3.93291	4.04038	3.91795	3.35961	3.6609	4.43034	2.08013	3.02991	2.57308	3.15577	2.58013	3.61645	3.10556	2.68633	3.20833	3.41368	2.67735
90	4.7203	3.46603	6.2032	4.38825	3.32543	2.97436	3.0594	3.32543	4.20278	1.99551	2.44145	1.92607	2.56474	2.80748	2.27244	3.37222	2.87671	3.14124	2.84359	2.55321
100	2.79231	2.88077	6.46731	3.42479	3.99423	3.06603	2.54829	3.16368	3.06346	2.01709	2.50385	1.81709	2.08953	1.94231	2.19423	2.46239	2.09487	2.49701	2.90021	2.49295
110	2.23077	3.43739	3.96432	2.63632	2.98205	3.14124	2.35897	3.10534	2.57308	1.82414	2.48504	2.46239	2.35107	1.93568	2.41004	2.20641	2.07778	2.16624	2.03953	2.21261
120	2.92799	2.88077	3.45492	2.31133	3.30491	2.93675	2.23547	3.0485	1.99936	1.81303	2.71389	2.24936	1.81944	1.74402	2.13675	2.68846	2.65855	1.8532	2.35897	1.98034
130	2.16624	2.79231	3.58184	2.3515	2.46944	2.52628	2.01068	2.76581	2.42265	2.01709	2.10449	2.35107	2.29765	2.34124	1.78056	3.86432	1.77564	2.15556	2.25235	1.82009
140	2.71218	2.0656	2.61303	2.50919	2.42585	2.59273	2.32543	2.33632	2.42585	3.83953	2.1797	1.92607	4.06133	3.9	2.29701	6.02585	2.04466	2.65919	2.32885	2.87479
150	2.22628	2.57992	2.32009	2.32543	2.42585	2.64979	2.16624	2.92286	2.28034	5.72863	3.40919	2.40385	5.18419	5.16068	3.18932	7.17906	3.52393	4.44167	5.09338	4.91197
160	1.52265	3.42543	2.32885	2.41966	3.12414	3.87308	3.70363	4.20897	2.01453	6.78483	5.73483	4.14786	6.25812	5.94124	5.11731	7.72799	5.38996	6.37137	5.77094	5.89786
170	2.24893	5.88077	4.03974	3.88098	5.4515	5.5765	5.92714	5.64893	3.99423	7.04124	6.95064	5.7188	7.00107	6.74038	6.80342	8.14081	6.62735	7.26346	6.87051	7.10427
180	3.22479	6.71944	6.74273	5.07692	6.99936	6.73632	6.79936	6.17735	5.48611	7.27778	7.57863	7.15983	7.10791	7.05171	7.12244	8.84915	7.80897	7.88932	7.80556	7.65064
190	5.28803	7.52991	6.54722	6.77991	7.36923	6.99679	7.84295	6.83056	5.77628	7.93419	8.21047	7.10641	7.91047	7.62671	7.79316	9.07329	8.55577	8.54957	8.45299	8.04081
200	6.86175	7.63312	7.76645	6.73184	8.57137	7.56538	8.20192	6.92094	6.79038	8.73312	8.79402	7.92778	8.76474	8.01731	8.35641	9.62799	9.16923	8.68974	9.18825	8.6359
210	7.44744	8.47842	8.3062	8.02073	8.73312	8.14744	8.71068	7.87991	7.19936	9.4797	8.77927	8.12329	8.8141	9.04338	9.34551	9.69103	9.74722	9.28654	9.50171	9.1859
220	8.39274	9.28141	8.45449	8.86538	8.81389	8.5235	9.23868	7.9953	7.8609	9.08697	9.3391	8.58974	8.71133	8.71453	9.27842	10.6088	10.1242	9.72415	9.46026	9.62201
230	8.97585	9.81624	9.29444	9.36773	9.64915	8.7609	9.53291	8.26496	8.24295	9.34551	10.1075	9.08462	9.3047	9.39103	9.85919		10.7754	9.9718	10.3235	9.67735
240	8.74658	9.98397	9.72692	9.72137	9.95769	9.1859	9.9718	8.75256	8.84231	9.62073	10.6519	9.5109	10.1509	10.0938	10.3103		10.7848	10.2566	10.344	10.357
250		10.8346	10.0455	10.1382	10.2269	10.1938	10.7742	9.40192	8.7609
260
270
280
290
300
310
320
330
340
350
360
370
380
390

## Sheet: Chromosome_span_bub-1
time from nebd (s)	embryo_1	embryo_2	embryo_3	embryo_4	embryo_5	embryo_6	embryo_7	embryo_8	embryo_9	embryo_10	embryo_11	embryo_12	embryo_13	embryo_14	embryo_15	embryo_16	embryo_17	embryo_18	embryo_19	embryo_20	embryo_21	embryo_22	embryo_23	embryo_24	embryo_25	embryo_26	embryo_27	embryo_28	embryo_29	embryo_30
0	6.63462	6.34274	6.81838	6.525	6.9859	6.36453		7.54038	6.06581	5.43932	4.04936	3.99209	7.02735			10.1592	5.23483		8.10897	5.61474	4.14081	9.26175
10	5.27735	5.72992	5.55897	6.35299	7.19402	6.30406		7.0485	4.11496	5.74231	2.62842	4.88227	7.59615			7.11966	3.77564		7.56218	6.5312	3.98162	8.6906
20	5.3547	5.39295	5.68376	6.79487	6.98141	6.16859		6.5391	4.2047	6.54808	3.39744	4.24979	5.95085			7.30256	3.71474	6.63761	5.76581	4.48461	4.68568	9.12692
30	4.3656	4.10449	5.61538	6.3468	7.22222	6.09594		5.84316	5.07244	5.09295	2.75705	3.95299	5.45833			7.00513	3.28633	4.8735	4.8438	6.03803	4.83697	6.83953
40	3.76346	5.14252	5.25684	5.0656	5.4844	5.51197		6.21731	4.78697	4.9985	4.45278	4.07137	4.5782			6.80256	2.99573	6.28162	4.94487	5.02927	3.67137	7.35833
50	4.74658	5.15833	4.96816	5.26111	5.55962	5.89487	8.83333	5.0344	4.18782	4.83483	4.59316	3.23397	4.14872			4.83697	3.18932	6.28162	5.42158	5.81261	4.24979	4.44402
60	4.55513	5.50833	6.22906	6.46795	4.9938	5.7688	8.14829	5.18825	4.2312	3.93355	5.55791	3.33291	3.19316			3.99188	2.93675	6.12692	5.74231	5.97244	4.30299	3.44551
70	4.72286	4.94487	5.64338	6.56688	5.23889	5.45235	8.06474	5.26133	6.44188	2.9062	4.49808	2.70812	3.42051			3.78568	2.00577	4.18953	5.03632	5.63825	4.61367	3.98162
80	5.22863	4.53718	5.36538	6.13077	4.92735	4.825	7.0688	5.26111	4.5938	3.28333	4.50876	3.36923	2.97714			3.24359	2.36774	3.4047	5.13611	4.42692	4.20278	4.32137
90	4.56389	4.37329	3.63868	5.03953	5.93269	6.57286	7.34167	4.21197	3.4203	3.09231	3.6218	5.03953	3.09701			2.97436	1.98419	4.60556	5.06154	4.09487	4.72714	3.93996
100	4.58718	3.98162	3.78034	4.66432	5.50427	3.22479	7.57137	5.02735	4.28825	2.88184	2.74103	4.30833	3.25192			3.31709	2.21132	5.98675	6.62436	4.33846	4.33248	4.19808
110	4.60278	4.38184	3.4391	4.7312	5.40791	5.5765	9.32821	5.03504	4.77799	2.5203	2.67094	4.13398	3.48568			3.5485	2.14274	5.7688	9.83312	4.09487	3.9406	3.65
120	4.56389	3.83953	3.40705	4.62863	4.69551	4.81496	8.26496	5.2906	3.76944	2.56902	3.46239	4.44765	3.43419			3.56133	2.34936	6.32585	9.4797	3.81346	4.06538	3.65
130	4.33248	3.73226	3.68739	4.30021	4.80385	5.44765	8.37564	4.78419	3.00235	2.41966	3.00342	3.78077	3.12628			3.94316	2.40278	4.54551	9.54444	3.73162	4.34466	3.76944
140	3.7609	3.43056	2.95492	3.63248	4.31902	4.24081	7.71368	4.97714	2.79316	2.58077	2.57799	3.22735	3.23932			2.59957	2.12479	4.9782	6.20598	4.09487	3.66645	4.08162
150	3.89081	2.8844	2.53333	3.85214	4.77799	5.16175	7.95342	4.5782	2.97436	1.84765	2.65214	3.75342	3.3953			3.12906	1.8032	3.84872	2.92372	3.4188	3.64637	3.02607
160	3.74316	2.0656	2.57863	3.07607	4.53269	4.4594	6.56709	4.20107	2.71218	2.37094	2.22628	2.65278	2.77372			2.79872	2.54231	2.02457	5.27842	3.51432	3.84615	2.83568
170	3.91923	2.82222	2.23141	2.48504	4.16111	2.54829	6.25235	3.23355	2.0765	2.20919	2.51132	3.34658	2.63056			2.75214	2.33312	2.41966	4.87521	4.27885	3.47329	2.50107
180	3.53633	2.9718	2.39423	2.12863	2.96239	2.2	5.67308	3.27436	2.25235	2.32543	2.46474	3.36368	2.55342			2.41859	1.74615	2.71966	3.06346	5.84872	3.45492	2.23077
190	3.2547	3.52692	2.00235	2.70278	2.55727	3.22479	3.99423	2.7906	2.30128	2.38889	2.60662	2.34124	2.41047			2.43633	1.88568	2.53633	2.02585	7.83483	3.65	2.74017
200	2.58077	3.1765	1.88868	2.67949	2.65064	3.0453	3.63868	3.07479	2.50107	4.1532	2.75	2.71239	2.3485			1.93761	2.20791	2.46838	2.57308	7.93184	4.13483	2.43419
210	2.38782	3.06346	2.00235	2.70278	2.93675	3.4812	4.13162	2.59124	1.84765	6.14551	3.93162	2.74722	2.29765			2.02585	2.16966	3.12414	2.21261	8.65919	4.3265	2.1344
220	3.05855	5.08697	2.87479	2.7859	3.0594	2.90534	3.93355	2.10791	2.71218	7.57842	6.18782	4.04936	2.1797			2.31902	5.84081	5.14103	2.70748	9.38718	6.4062	2.19872
230	3.89081	7.46474	5.00662	3.44872	2.71218	3.1218	3.53633	3.44039	2.02714	8.45299	8.14915	7.94124	2.13803			2.36774	9.59508	7.86261	4.34701	10.2752	8.53397	1.98419
240	5.99145	8.96538	7.75898	5.42457	2.93419	3.2547	3.67692	5.05556	2.68483	8.92115	9.02842	12.6891	2.66987			2.09487	10.8205	7.84295	5.36517	9.87372	9.87564	2.39423
250	6.37842	10.3705	10.4387	6.21133	4.26688	4.49231	4.8203	7.32158	2.29701	10.2754	10.3058	14.4577	4.67927			2.86774	12.2626	8.69124	6.87051	9.97949	10.5703	2.59273
260	7.60235	10.8293	11.0286	7.54017	6.6985	5.27265	6.17393	9.11197	4.17329	10.4994	11.3321	15.5566	11.3184			5.18376	13.1998	9.68291	8.17222	10.1062	11.4893	2.59273
270	8.10876	12.1927	12.0314	7.93846	7.71902	5.61645	7.35235	10.4925	6.62436	11.3588	12.2333	16.2836	16.3735			7.18633	14.9778	9.93718	8.73953	10.7141		3.1218
280	8.87842	12.6936	12.5637	9.09872	9.27714	6.47949	7.96325	11.0705	9.04979	11.1667	12.116	17.0107	18.1004			9.93397	14.1137	11.2312	9.41133	11.9017		5.38547
290	9.3641	12.0496		8.70064	9.6156	6.44188	8.96474	12.2421	10.8152	11.9024	12.3402	17.3427				11.1314		11.3686	10.3049			8.4094
300	9.72137	12.7207		9.45983	10.6212	6.66944	10.5291	12.7564	11.331	11.4992	12.9641	17.4				12.1709		12.1096	9.88697			10.228
310	9.8891			10.1861	10.5818	6.9859	10.3827	13.315			13.0575	17.847				13.4237		11.8966	9.96474
320	10.5162				11.7468	7.4782	10.8974	13.7365			13.0718	17.4389				13.6203
330					11.5808			13.7816
340					12.4889
350
360
370
380
390

## Sheet: Chromosome_Span_cls-2
time from nebd (s)	embryo_1	embryo_2	embryo_3	embryo_4	embryo_5	embryo_6	embryo_7	embryo_8	embryo_9	embryo_10	embryo_11	embryo_12	embryo_13	embryo_14	embryo_15	embryo_16	embryo_17	embryo_18	embryo_19	embryo_20	embryo_21	embryo_22	embryo_23	embryo_24	embryo_25	embryo_26	embryo_27	embryo_28	embryo_29	embryo_30
0	7.68077	6.57286	7.67158	7.61346	9.26966	8.18974	7.30342		8.78419	8.60299	7.65385	8.65855	8.82521	8.0656	8.70256
10	6.67927	6.38098	7.73996	8.56175	10.1227	7.9344	7.49423		9.34017	7.85748	7.99017	8.49936	8.85171	9.19701	8.95769
20	8.26774	6.5609	5.74466	8.05983	9.84829	8.38462	7.68355		9.01047	8.31389	7.98141	7.29274	8.88953	8.86325	9.02393
30	10.2583	7.25299	4.72137	7.75299	8.78483	7.55128	7.67906		8.16453	7.93803	8.37863	9.34786	10.5759	8.90577	8.72393
40	10.3103	8.29765	5.46218	7.42415	8.16752	8.33355	8.54872	7.50299	8.02094	7.97842	8.3485	9.26496	10.7276	8.06367	8.02094
50	7.42991	8.47842	6.54722	8.63227	9.15342	8.33355	7.48056	8.01838	9.81496	7.83996	9.31175	9.82009	11.2763	8.54872	9.20641
60	10.9058	8.42906	6.21944	8.63697	9.50385	7.9218	7.96218	8.55791	10.3139	7.90641	8.73483	10.282	11.4353	8.57009	10.0938
70	11.4391	8.73312	7.0656	8.65385	9.90684	7.85556	8.73269	8.41218	11.478	7.90641	9.62393	10.503	12.3712	7.8953	8.36731
80	11.9141	7.72137	6.04701	10.7588	11.0579	8.18974	8.58462	9.52415	13.4496	7.98013	8.85684	10.4682	13.8265	6.95556	7.9344
90	11.7938	8.53333	9.8985	11.8218	11.9182	9.23868	10.0859	9.79829	15.4105	7.63739	10.1622	12.9248	15.1979	9.89701	8.27714
100	13.6017	9.19338	12.5816	14.9474	14.2628	10.7494	9.3812	11.6286	18.9846	6.8468	10.8487	13.3966	18.1859	11.4224	10.5895
110	14.0605	9.93718	12.4923	17.6169	16.7385	13.2015	10.5748	13.2756	20.7579	6.8391	11.7882	15.6639	21.2175	13.0667	12.1511
120	14.9588	11.8357	13.0124	20.3882	18.6994	14.4944	11.7124	17.1541	23.5286	8.62094	12.7177	16.2769	21.6914	17.7885	15.5904
130	14.6844	14.253	13.8908	21.1639	18.8024	15.5671	14.9547	18.2194	19.6586	9.98782	13.3756	18.363	22.1222	17.0494	16.0867
140	15.2763	15.8667	16.0491	22.4468	18.7628	15.4748	17.8575	18.832	21.3586	13.1549	14.7823	17.7996	22.6141	16.7365	18.6769
150	16.0553	17.21	15.7598	21.7415	19.21	15.8962	18.8889	19.0036	19.9472	16.5491	15.95	18.6414	22.3154	18.1944	18.522
160	17.4733	17.4096	15.8425	21.7423	18.3959	16.2395	18.569	18.1197	20.2641	17.6071	16.5271	17.5603	22.6393	20.1553	18.3457
170	17.666	15.706	17.3769	21.6098	18.216	17.1434	19.8417	20.7216	19.2391	19.1107	17.6113	19.7756	21.969	19.3934	19.1282
180	18.8462	16.2449	15.4966	19.6071	18.4367	16.1944	20.4846	18.6414	19.9218	20.8028	18.1966	17.4756	21.9195	20.5962	18.8361
190	18.6333	15.5128	15.8932	19.8447	20.3128	16.7417	20.6427	19.2788	19.5415	20.7145	18.7113	18.6009	22.7645	19.888	18.4874
200	19.2451	16.1297	14.6011	19.978	20.4596	17.2256	21.2083	18.5477	19.1028	21.4	19.5406	18.9231	22.3466	19.0746	19.7637
210	18.2983	17.3605	15.8064	19.16	19.7643	17.5214	20.6929	18.8051	19.8329	20.872	18.3673	18.8056	23.8758	17.3761	19.5008
220	19.0233	16.71	15.9297	18.6519	20.8162	17.4222	20.1273	18.9594	20.156	20.832	19.1643	19.1628	23.0263	18.1624	18.1558
230	18.7959	18.0831	16.084	19.8156	19.9812	17.9086	20.5818	17.881	20.8032	20.4436	17.7573	19.6953	25.2299	16.9848	17.0709
240	18.7051	16.7985	16.3791	17.3976	20.2068	17.5284	18.4199	19.587		19.4455	20.2468	19.2177	22.625	19.3376	18.7744
250	19.819	16.8541	16.1427	17.4188	20.5731	17.6479	20.6908	19.8799		18.3203	19.1455	18.9994	23.5323	19.3611	18.6951
260	20.2991	16.5297	16.5838	15.7218	19.9098	17.9385	19.4998	18.9214		16.6079	20.1741	19.5844	21.8509	19.319	18.6393
270	21.1357	16.7038	16.2709	16.1722		17.5169		18.7895		19.166	18.8581		22.9062	19.7068	19.5216
280	21.1299		16.3594			17.9855		18.2876		16.8128	18.9053		22.3462	20.3162
290
300
310
320
330
340
350
360
370
380
390

## Sheet: Chromosome_Span_hcp-12
time from nebd (s)	embryo_1	embryo_2	embryo_3	embryo_4	embryo_5	embryo_6	embryo_7	embryo_8	embryo_9	embryo_10	embryo_11	embryo_12	embryo_13	embryo_14	embryo_15	embryo_16	embryo_17	embryo_18	embryo_19	embryo_20	embryo_21	embryo_22	embryo_23	embryo_24	embryo_25	embryo_26	embryo_27	embryo_28	embryo_29	embryo_30
0		8.57094	5.48996	5.25577	7.97778		6.24594	10.753	5.41496	5.49594	7.38825	5.28611	6.41068	8.71624	9.71517	5.86731		7.37714	7.27094	8.45299	6.42009
10		7.19936	5.38355	4.27585	7.30427		5.21111	9.69936	7.90171	3.45492	6.89701	5.58462	6.20684	6.72115	6.4297	3.49081		6.38376	7.09722	7.44637	7.04808	6.69252
20	9.75577	6.15171	5.60876	3.79295	6.37842	6.42457	5.23889	7.40577	7.96517	2.9547	5.54829	5.075	6.21667	5.78462	7.1015	4.14637		5.91004	7.79231	5.67158	5.85598	7.83868
30	6.05919	5.71987	3.82906	4.26047	6.40748	5.02244	5.10684	4.77799	10.2744	3.49295	5.00919	4.22393	5.63398	4.59658	5.69124	4.28291		6.23739	7.55128	4.34701	4.82073	7.54615
40	8.05064	4.93974	3.03269	5.76346	6.4438	6.5485	6.83953	4.47436	10.7267	3.49295	4.31667	3.65	6.74081	4.75128	5.76346	4.22393		5.10684	6.8141	3.71474	5.7015	8.2218
50	5.15833	6.05791	4.11004	4.18291	7.87543	7.82543	7.04124	4.03162	11.0032	3.56773	3.69402	4.91453	6.29359	4.7359	6.10427	4.63184	6.88077	6.48782	5.67308	4.22393	4.89017	8.80684
60	4.80385	8.00299	4.9062	8.43611	8.80107	8.68077	6.77991	4.42308	10.4942	6.71944	4.34701	4.92735	8.35299	6.61773	6.69658	4.45256	7.12692	5.88376	6.2047	3.45492	6.49679	9.23739
70	5.82222	9.27265	5.28611	9.07949	10.5874	9.22521	6.94551	6.66944	11.8383	8.05812	4.34701	6.18462	7.58633	7.23697	8.04872	6.9891	8.10833	7.29316	5.15278	5.21688	6.14893	9.34786
80	7.0688	11.478	5.92586	11.232	9.28697	12.1814	8.81731	7.62821	13.5323	8.95427	7.66731	6.9703	10.4568	9.23461	9.325	8.41538	7.94124	10.5953	7.51795	5.96966	6.21774	10.5412
90	9.36389	13.9718	7.71667	11.0803	10.3169	15.4808	12.4455	9.48205	13.8282	11.1496	8.67692	7.72949	11.9974	11.4938	10.1353	10.9744	9.89915	13.3284	8.26026	7.42415	8.58974	12.7383
100	10.5385	15.6799	10.4254	14.2573	12.684	16.6421	14.3075	12.4835	14.9301	13.9472	9.62201	8.84573	14.6808	14.1335	10.5588	12.5165	10.5049	15.5923	9.32393	9.68034	10.5049	14.893
110	12.9934	17.0252	11.134	15.9515	16.0861	18.6701	15.4912	14.9669	15.5329	14.1481	10.0891	13.3158	15.91	14.0733	11.4194	13.9957	10.372	17.313	10.3235	12.4303	11.4395	17.8167
120	16.2231	17.2242	12.759	16.0068	17.7694	21.0002	17.4703	15.7143	17.1086	16.0889	10.2449	16.9977	14.8876	18.413	13.8306	15.5799	13.1934	16.882	11.9389	14.7566	13.4658	18.7656
130	17.7066	17.969	14.7182	19.1056	18.9197	21.7259	18.5105	16.6235	18.9124	15.0393	11.6829	19.5765	17.619	17.4306	15.7729	17.2389	15.66	18.0201	12.9942	16.9265	13.4419	21.5562
140	19.0291	20.8056	15.9293	18.775	19.6417	20.887	20.9133	17.9957	18.797	16.6912	13.4633	18.9502	19.0192	18.131	19.1654	18.4782	17.2128	18.2795	14.7876	18.0222	14.2707	21.347
150	18.0314	21.1568	16.6949	19.6075	20.2573	21.415	21.2878	18.2214	18.812	15.3968	15.3927	19.4021	19.4028	20.8222	18.9167	19.2235	18.3568	20.2483	15.3188	19.2182	14.5767	21.816
160	20.0912	21.8485	18.0047	18.0564	20.7197	20.6603	21.4551	18.1818	20.4133	16.64	18.5137	19.0876	20.5451	19.6603	19.6985	19.1468	18.0754	19.9045	16.015	19.4021	16.759	21.8177
170	20.3709	21.2395	18.2015	18.678	20.184	20.0701	20.6727	18.4013	18.9652	16.1925	18.7128	20.1573	22.3429	17.6812	19.8237	18.9872	17.6464	18.6583	15.3224	19.8451	16.9692	20.4476
180	20.6786	21.0846	18.2438	19.6201	19.1776	20.5342	22.5434	17.1385	17.8583	16.9667	19.2263	19.391	19.5528	18.0201	18.0222	18.6256	19.4799	17.7585	16.631	18.3028	16.2419	19.7237
190	19.7306	20.0154	18.953	19.4246		19.7406	23.7412	16.9654	18.678		19.334	19.507	20.0477	16.4752	19.0342	18.3028	19.4154	16.7925	15.8654	18.5733	16.9996	20.4122
200	18.9218	20.4417	19.6592	19.1425			21.8949	18.1703			20.4517		18.5801	17.625	19.7066	18.3327	18.8143	15.3731	17.1417	18.4541	16.4697	18.7598
210	18.5011		19.4513	18.715			21.7336	17.5271			19.8333		17.8105	16.038	18.6118	18.4419	19.7808		16.944	18.0539	17.4549	18.8504
220	16.4321		19.3921	18.2977			22.1115				20.9594		17.5453		18.5658	17.4105	19.059		18.1314	18.3367	17.9434	19.794
230	15.5664		17.3071	18.6519							20.4981		17.237		19.0545	16.9237	18.7344		17.1816	18.8457	16.872	21.3177
240	14.1314		15.6023	15.5932							19.0314		17.0252		17.9442	16.9667	17.6829		16.4188		16.7718	19.9555
250	14.9325		15.9239	16.9733							18.3216		16.6733		16.563		18.7002		16.1297		15.8156	19.8861
260	14.2769		16.959	17.7989									16.7299		16.2679		16.4468		16.1457		16.5344	20.0288
270	14.0385		16.4235	16.9727									17.4476		14.7393		16.3656		17.3814		16.8989	18.3449
280	14.7092		16.6212	16.5244									17.9397		15.1212		15.8628		15.6987		15.3665	18.3938
290	14.9079		16.993										17.3605		14.4295		14.8423		15.9558		15.9906	18.5331
300
310
320
330
340
350
360
370
380
390

[truncated: 2 more sheets: Cromosome_Span_cls-2+bub-1, Chromosome_Span_hcp-1+bub-1]
