# Supplementary material for: BUB-1 promotes amphitelic chromosome biorientation via multiple activities at the kinetochore
Source: eLife journal article supplement (doi:10.7554/elife.40690), 2018-12-14
Supplement: supp [file elife-40690-supp-v1.zip › elife_poa_e40690_Figure_1_source_data_2.xlsx]

## Sheet: Fluorescence_Intensity
PHX441	PHX441_BUB1	PHX444	PHX444_BUB1	JDU146	JDU146_BUB1
110.188	1.75365	73.8407	3.85651	135.306	2.99832
101.115	0.557528	25.4966	4.18856	120.208	5.66599
87.5763	2.31477	25.704	4.54542	109.32	-1.26348
87.7966	3.62274	22.9143	3.25258	116.835	0.307301
122.494	6.05119	23.6957	0.80735	111.695	4.05231
92.3301	3.68378	20.9503	2.90007	114.299	-0.00951852
116.901	4.00019	24.9274	4.18614	81.0928	6.23479
76.255	0.747961		4.21721	79.7818	0.419606
91.6065				80.2741	4.0128
92.426				68.8756	3.0381
133.35				76.9825	2.16598
87.9614				105.33
