# Supplementary material for: BUB-1 promotes amphitelic chromosome biorientation via multiple activities at the kinetochore
Source: eLife journal article supplement (doi:10.7554/elife.40690), 2018-12-14
Supplement: supp [file elife-40690-supp-v1.zip › elife_poa_e40690_Figure_2_figure_supplement_1_source_data_1.xlsx]

## Sheet: Sheet1
WT	D85-505
1.16881	0.027542
1.22205	0.0377265
1.30706	0.0821169
0.916916	0.0760439
1.43284	0.120439
0.958159	0.0566442
0.966186	0.207418
0.965841	0.249698
0.466165	0.113345
1.06751	0.0786901
1.01058	0.0668849
1.15346	0.118753
0.633425
0.731004
