# Supplementary material for: BUB-1 promotes amphitelic chromosome biorientation via multiple activities at the kinetochore
Source: eLife journal article supplement (doi:10.7554/elife.40690), 2018-12-14
Supplement: supp [file elife-40690-supp-v1.zip › elife_poa_e40690_Figure_2_source_data_1.xlsx]

## Sheet: Chromosome_Span_JDU440_knl-1
time from nebd (s)	embryo_1	embryo_2	embryo_3	embryo_4	embryo_5	embryo_6	embryo_7	embryo_8	embryo_9	embryo_10	embryo_11	embryo_12	embryo_13	embryo_14	embryo_15	embryo_16	embryo_17	embryo_18	embryo_19	embryo_20
0	8.28889	6.64808	4.68633	6.80086	8.00064	5.41367	6.07479	3.88889	7.90769	7.30876	7.10299
10	7.43419	6.96688	4.93889	5.66645	8.68504	6.54103	6.18419	4.0218	8.15235	6.45214	6.12329
20	7.45662	5.95662	6.68269	4.99509	6.37842	5.45235	6.03355	3.9703	7.72137	5.82863	4.94914
30	6.08932	5.87714	4.81902	4.55534	5.59466	5.04295	7.28141	4.64338	6.29701	6.69979	4.20513
40	4.87286	5.40833	3.96624	5.32265	6.36453	3.44829	6.75705	4.4438	5.51068	5.49359	3.82009
50	6.36966	5.00427	3.38269	6.26539	6.14551	4.13098	3.73504	2.96261	4.9032	5.07906	5.23932
60	4.14786	5.08162	2.8812	4.80598	3.82244	3.32393	4.64615	3.06133	6.04231	4.67286	4.13291
70	3.78376	3.48868	2.79615	3.4047	3.2515	2.31902	2.9938	2.5485	4.86218	3.43633	4.31367
80	3.47842	2.79615	2.62628	3.6797	3.59957	2.41752	2.85534	2.49188	3.36538	2.46645	3.01902
90	2.90278	1.88868	2.24615	3.13718	2.61218	2.25235	2.61966	2.7859	3.20919	2.60171	3.07094
100	3.38269	1.97714	2.02991	1.99551	2.67735	2.21261	2.51752	2.7859	3.44551	2.57863	2.63697
110	2.8812	2.35107	1.8765	1.92436	2.35897	2.29359	2.41047	2.28633	2.73739	2.04466	2.42521
120	2.08611	2.03633	1.97949	2.22521	1.88184	2.38889	2.39914	2.42222	2.53846	1.95919	2.75
130	2.3468	2.02991	1.98803	1.59274	2.61218	2.16966	2.02222	2.82051	1.94957	1.60705	2.20064
140	2.38889	2.03633	1.9297	1.69893	1.85726	1.86966	2.0109	1.75235	2.09423	2.09893	1.87051
150	2.43633	2.35107	2.20064	2.07051	2.29359	2.6735	1.99444	2.45961	2.09893	3.34658	2.31239
160	2.59957	3.04487	3.7938	2.38056	3.20107	4.03419	2.64295	4.31197	2.99573	5.01389	2.67949
170	4.39209	5.09274	5.78312	3.67692	5.34188	6.18397	4.26944	5.82927	4.29081	6.72735	4.29487
180	6.3235	6.18227	6.58803	6.18462	6.5782	6.80385	5.34295	6.07479	5.98312	7.49188	6.04231
190	6.60855	7.13184	7.51774	6.66218	7.70427	7.8532	6.49872	6.70962	7.9438	7.91624	6.75406
200	7.54722	8.12991	8.60085	8.04081	7.79316	8.46346	6.99936	7.21538	8.1515	8.44829	6.99679
210	7.96432	8.3047	9.01111	8.47842	8.56859	8.51987	7.64017	8.27137	8.64487	9.07308	7.50171
220	8.89466	9.13526	9.6	8.72158	9.23739	9.33162	8.33013	8.75427	9.06367	9.91367	7.65748
230	9.19637	9.24893	10.0782	9.74765	9.23868	9.53483	8.29274	9.44594	9.42308	10.003	8.56367
240	9.62799	9.63675	10.6147	9.63013	9.65769	9.80021	8.86816	9.45791	9.94594	10.21	8.87244
250	9.93782	10.0464	10.7936	10.0021	10.4536	10.1143	8.83098	10.0229	10.4244	10.1526	9.97265
260	10.3111	10.5836	11.2113	10.391	10.8229	10.6985	9.13611	10.5861	10.4182	10.6088	9.26987
270		10.6325	11.7959	10.7981	11.244	10.5568	9.52842		10.8282	11.2635	10.0598
280		10.953	12.0932	11.4041	11.3972	11.1353	9.75128		11.6927	11.3543	10.703
290		11.6498	11.8162	11.409	11.9355	11.8665	10.8282		12.0286	11.3543
300
310
320
330
340
350
360
370
380
390
400

## Sheet: Chr_Span_JDU440_knl-1+hcp-1
time from nebd (s)	embryo_1	embryo_2	embryo_3	embryo_4	embryo_5	embryo_6	embryo_7	embryo_8	embryo_9	embryo_10	embryo_11	embryo_12	embryo_13	embryo_14	embryo_15	embryo_16	embryo_17	embryo_18	embryo_19	embryo_20
0	8.04872	6.63761	6.65897		6.62821	7.5141	7.08547	6.25534	7.65962	8.33611	6.49829
10	7.34167	5.9391	6.3609		5.70235	5.03205	7.72137	6.6985	5.83953	7.28718	4.87521
20	6.78141	5.46944	5.90662		6.53184	5.2953	7.50833	6.74081	5.43611	6.48184	4.11688
30	7.15278	4.32543	5.81261		4.90577	10.1177	6.04701	5.30128	5.3438	5.98974	4.47073
40	6.71261	5.93013	5.88889		4.91197	10.032	4.29551	6.86132	4.77799	6.21133	6.50064
50	5.92372	7.0094	7.70855		6.02051	11.0613	5.16175	8.28697	7.14274	8.28697	7.72137
60	7.27778	6.84829	9.01645		7.74038	11.9278	6.90876	10.5703	7.80876	7.91111	8.69765
70	8.12244	6.55897	9.36517		10.6754	12.856	8.51282	10.4536	7.76645	8.42393	10.4506
80	8.90342	6.19701	11.2449		12.3746	14.3156	11.2402	10.1553	8.39274	9.98397	12.7511
90	9.46026	10.8545	13.1218		14.597	15.5656	14.8237	10.0081	9.2265	13.0577	14.5218
100	11.9829	11.9068	14.5521		15.6258	17.4397	15.6075	14.2331	10.21	13.9299	15.0865
110	13.9009	12.5406	16.4269		17.2113	18.8041	18.3547	16.469	11.9203	16.1423	16.3278
120	14.4383	14.5622	16.2558		19.3197	19.2765	19.737	19.5216	16.1021	17.0947	17.4611
130	13.4637	16.5303	16.5955		18.963	19.3643	19.4485	20.0906	16.8754	17.3406	18.7908
140	16.6528	17.6688	17.9647		20.3705	19.8135	19.6346	22.1338	17.9964	19.6246	18.0357
150	15.7447	18.3541	17.6169		19.6859	18.5002	19.028	19.9908	17.3515	18.2338	18.9427
160	17.1137	18.8987	19.716		19.0938	18.037	17.8489	20.6436	20.4113	18.9523	19.263
170	16.8261	19.7254	20.3545		18.1568	17.2139	15.8083	18.4504	19.759	17.3282	18.6774
180	16.71	19.244	19.0096		18.7472	18.1263	17.8382	18.0754	19.0173	17.9658	17.5308
190	18.0145	17.4885	18.5887		18.1256	16.7566	15.4701	17.4588	18.2716	17.669	17.3197
200	17.6754	17.1444	16.8504		18.2705	16.75	16.6959	17.2365	18.3983	19.3737	16.1194
210	17.3953	16.8363	16.8603		16.0823	15.9752	17.1556	17.2836	17.5284	17.894	17.2741
220	17.3064	17.1498	15.406		16.9836	17.3041	16.7107	16.5598	17.8103	18.3767	15.7793
230	16.3763		16.3874		16.6254	15.8818	16.3006	17.0336	16.5635	17.2402	15.7692
240	17.6979		15.8654		16.1517	16.2607	16.7517	16.9733	15.5741	16.0256	15.0028
250	16.3111		17.8184		16.6778	17.0241	16.3571	17.6152	15.213	14.1083	16.0015
260	16.1115		18.1199		16.6923	17.3564	16.3541	18.035	16.5085	15.0299	14.5015
270	18.2915		17.8553		15.8628	17.6041	16.7256	18.5083	15.1737	16.2996	13.4673
280	17.8207		18.0244		15.7799	17.9566	16.7173	19.0677	16.4585		13.4737
290	17.8735		19.0417		15.4274	18.2793	16.9859	18.9846	16.1194		14.0532
300
310
320
330
340
350
360
370
380
390
400

## Sheet: Chr_Span_JDU441_knl-1
time from nebd (s)	embryo_1	embryo_2	embryo_3	embryo_4	embryo_5	embryo_6	embryo_7	embryo_8	embryo_9	embryo_10	embryo_11	embryo_12	embryo_13	embryo_14	embryo_15	embryo_16	embryo_17	embryo_18	embryo_19	embryo_20
0	4.93803	5.19914	4.70085	6.6156	5.89444	5.6859	11.0966	5.3141	4.25812	8.50748	6.84209		7.49124	5.75342
10	3.93483	4.36667	5.39551	4.94829	5.40278	4.32543	8.54145	5.66367	5.26068	8.54209	5.41752		8.00662	4.98974
20	4.5218	3.25855	4.70214	5.40491	3.89231	4.35406	6.59359	4.59423	4.49637	6.76133	5.22628		6.47628	4.73291
30	4.87521	3.64573	4.60919	5.64338	3.14081	3.33611	5.36132	4.18248	4.01923	4.94338	3.52927		7.26902	4.17244
40	5.62286	2.82521	3.94359	3.62692	3.47842	3.80107	5.49872	3.41752	3.50171	3.87607	3.51303		6.31367	3.87286
50	4.71368	3.03162	3.60449	4.87265	3.8594	4.09466	5.36218	3.93889	3.44551	3.2656	3.1765		5.66603	3.75064
60	2.98419	3.31367	3.39957	5.54017	2.42222	3.76688	3.65	3.1765	4.16603	5.56474	3.51795		5.17607	4.12201
70	4.99509	3.20961	3.61111	5.74872	3.37222	4.25983	2.9062	3.09701	3.0218	2.88654	3.70876		4.13568	3.48868
80	3.07094	3.44039	3.67158	5.05556	3.28825	3.71816	3.1765	4.53269	3.01282	3.90534	3.89231		4.31133	3.24487
90	4.20662	3.61752	3.37607	5.04765	4.05598	3.13141	3.56133	3.95192	3.37393	4.01218	2.61325	4.46581	3.75064	2.40085
100	3.58974	2.8718	3.63611	5.64124	3.40299	2.64295	3.00577	4.08226	3.27735	4.43889	3.12628	3.63868	4.70577	2.83867
110	3.66581	3.27991	4.03526	5.11752	3.09872	2.05064	2.8844	3.89081	3.04487	3.70492	2.75406	4.08226	4.07457	2.62778
120	3.21624	2.95748	3.46026	4.47735	3.11218	2.33312	2.97436	3.22115	3.20513	3.8594	2.60363	3.52393	3.53846	2.23205
130	3.30385	2.72393	2.98611	3.65449	2.61325	3.06346	2.76581	3.52158	3.04679	3.6641	2.60833	3.63291	3.34444	2.36496
140	3.40299	2.37222	3.12756	4.12393	2.69487	2.55727	3.16133	2.96709	2.67308	3.56581	2.24252	2.72222	2.81496	2.21603
150	2.8718	2.37222	2.79615	3.22158	2.25427	2.08504	2.59273	2.59124	2.31923	2.71389	2.30278	2.94637	2.59615	1.86581
160	3.05983	2.03419	2.91603	2.47457	2.06197	2.02585	1.79338	3.03868	2.00235	2.90235	2.1532	2.75363	2.65214	2.10449
170	2.30449	2.52479	2.3468	2.54466	2.23141	2.72991	2.50919	2.35598	1.87051	3.00705	2.22308	2.68419	3.29979	2.31923
180	2.43633	2.36004	2.39914	1.93568	2.16923	2.10919	2.79872	2.95555	1.98226	2.6312	2.10235	2.52479	2.20256	2.20256
190	2.45555	2.45961	2.12671	2.21154	2.11667	2.83568	2.16261	2.70492	2.16923	2.33205	2.14444	3.03397	2.8532	2.3485
200	2.28633	1.81944	1.76197	2.69487	2.20256	3.20598	2.56816	2.27457	3.85214	2.67308	2.74765	4.58697	2.79679	3.54744
210	2.42799	3.24979	2.67137	2.01944	2.35278	4.46047	2.40278	2.41859	5.15855	1.97009	4.20897	6.40256	3.79615	7.38205
220	2.23141	5.30427	3.21624	2.42799	2.75983	5.86175	3.29573	2.58397	6.47778	2.33632	5.88162	7.66795	5.86389	9.83141
230	2.3468	6.9765	4.40513	3.14637	4.89039	7.43269	4.88184	2.95555	7.58504	2.57308	7.22735	8.34744	7.93376	11.8261
240	2.69487	8.18162	5.40491	5.42372	7.175	8.09124	6.41389	3.82308	8.70876	3.43633	8.14829	9.56453	9.20534	12.7389
250	2.34316	8.68761	6.27543	7.74573	8.01667	8.81731	7.28761	6.9906	9.49872	5.34423	9.25171	9.94936	9.0156	13.4977
260	3.6735	9.10727	7.0109	8.93633	8.77927	9.28504	7.70064	9.26004	10.4889	7.1344	9.74701	10.3256	11.2303	13.6562
270	5.93162	9.93996	7.42821	10.4438	9.55662	10.212	8.24808	10.2457	10.7385	7.67607	10.3248	10.9135	11.085	14.3013
280	7.27628	10.4925	7.58034	11.0382	10.0412	10.2959	8.96923	11.7502	11.3816	8.72051	10.9793	11.241	11.4891	14.712
290	9.13782	10.8235	8.11132	11.6346	10.7658	10.3835	8.93291	12.3474	11.7135	9.34167	10.5045	11.4825	12.2793	14.3273
300	10.2919	10.9241	8.56047	11.7098	11.0556	10.7609	9.03205	13.0737	11.953	9.64872	11.3461	11.5395	12.4506	15.2374
310	10.2979	11.2521	8.74915	12.0041	10.9998	11.1496	9.43312	13.566	11.7577	9.9735	11.1088	12.0414	12.7269	15.5135
320	10.4823	11.5256	8.78825	12.3282	11.8989	11.357	9.79615	13.8466	11.8229	10.843	11.6367		12.994
330	11.2211	12.3056	9.53397	12.3979	11.9754		10.1402	13.9427		10.7278			13.3034
340	11.5256	12.2962	9.63675	12.8697	12.165			14.1579		11.0126			13.0998
350	11.7912
360
370
380
390
400

## Sheet: Chr_Span_JDU441_knl-1+hcp-1
time from nebd (s)	embryo_1	embryo_2	embryo_3	embryo_4	embryo_5	embryo_6	embryo_7	embryo_8	embryo_9	embryo_10	embryo_11	embryo_12	embryo_13	embryo_14	embryo_15	embryo_16	embryo_17	embryo_18	embryo_19	embryo_20
0	4.92286	6.03397	10.5308	4.87714	6.73376		4.94744	4.55812	5.95235	4.24124	6.26218	5.35086		6.37457	4.90171
10	6.0609	3.94893	9.8718	5.48611	5.65726		4.75128	3.59808	4.9218	3.97457	6.57521	3.99081		4.82094	4.63483
20	6.56667	3.70449	9.98632	5.7938	6.16709		5.09701	4.45983	4.63846	3.73355	5.34701	4.02949		4.74829	4.50748
30	6.35342	3.44551	8.17735	4.73526	5.63077		5.15684	3.99081	3.94893	4.49038	6.55962	3.20513		4.03803	3.52756
40	6.83803	4.55833	3.91731	4.46218	4.28526		5.01667	3.84658	3.58547	4.37179	5.41367	3.20021		3.80919	4.50406
50	5.27073	3.43056	3.6485	3.95021	3.87628		5.14103	3.2703	4.13568	5.06923	5.07094	3.49957		3.6797	5.08611
60	7.33932	5.3438	4.24124	4.2047	3.87628		4.19017	4.20107	6.01175	4.89893	6.06047	4.00363		4.55321	4.71368
70	7.26645	5.70919	4.3359	5.22479	4.6297		5.41731	4.91966	5.00021	4.49231	4.0797	4.23654		3.89658	5.36367
80	6.26816	6.26816	8.66325	5.67714	3.74316		6.46624	2.75769	4.87991	3.82415	4.75128	4.87991		4.47992	4.61389
90	6.41389	5.98675	8.31133	5.18034	3.76154		7.72521	3.36709	4.61389	3.85876	3.76688	6.32179		4.85961	5.85214
100	6.00363	6.05791	8.71432	5.25812	4.12671		8.51987	3.75492	5.61538	4.11731	4.42286	5.17521		4.42991	4.84487
110	6.21133	6.27628	9.36816	4.81496	4.6515		9.00727	3.02414	5.50235	4.06133	4.52329	4.98397		4.24124	5.65256
120	6.63355	5.21154	8.76389	4.81645	4.52329		9.03996	3.7141	5.49979	3.91816	4.45769	5.11175		3.73932	6.00214
130	6.11581	4.86218	7.05086	4.93974	4.44402		8.6218	3.76261	5.3547	3.61111	6.23611	5.60876		3.36368	4.70833
140	5.15983	4.70299	8.04338	4.73526	3.95598		8.53782	4.05769	5.10278	3.17885	5.77222	5.18611		3.07842	4.89893
150	4.99038	4.8453	7.0688	4.47073	3.8547		8.79573	3.77799	4.12201	3.37842	5.70192	5.03077		2.96175	4.80556
160	4.6297	4.42115	7.23034	4.1015	4.55897		8.85983	3.41303	4.71325	3.8391	5.56688	4.70577		2.52137	4.58697
170	4.49167	4.24081	7.26261	4.3656	4.20641		8.62094	3.1765	4.35876	2.97991	5.21688	5.30577		2.41859	4.0812
180	4.69551	4.37329	6.8156	4.7641	3.66645		8.74658	3.67628	4.1906	3.38739	4.26688	4.53846		2.32906	3.74423
190	4.6515	4.50748	6.85278	5.38355	4.53675		8.70064	4.46303	5.23526	3.71987	4.30491	3.51303		2.60876	3.80321
200	4.9765	5.14103	7.21068	6.2438	4.6297		8.93974	5.30363	5.44979	5.16432	4.28825	4.15748		2.2	3.8765
210	5.44765	5.86731	6.28162	6.53184	4.60278		9.71645	6.13291	5.9515	5.52393	3.3688	4.0906		2.66133	3.81667
220	6.19829	6.98333	7.08611	6.93846	4.65577		11.0784	6.88526	6.01175	6.04744	3.68867	4.9782		2.29765	4.74701
230	5.98461	7.42415	7.31688	7.33312	5.13462		11.7697	7.09829	6.20214	6.59017	2.82222	5.3485		3.44551	4.72906
240	6.63013	7.8609	8.06816	7.42415	5.63227		12.3656	7.52628	6.23547	7.21474	3.33846	6.30363		3.73355	6.02585
250	6.63013	8.18056	8.59081	8.57222	6.49679		12.647	8.43162	6.95748	7.5515	4.19209	6.69872		4.74701	6.84274
260	7.12821	8.28184	9.54124	8.96709	7.42286		13.4816	8.60833	7.57457	8.38547	4.62137	7.60064		5.36346	7.77564
270	7.40876	9.04594	10.2389	8.79423	7.63697		14.181	9.06795	8.14936	8.27308	4.94744	7.72521		5.49979	8.43633
280	7.93803	9.40876	10.3827	8.88718	7.9406			9.77222	8.66389	8.5156	5.8109	8.4344		6.04551	8.58162
290	8.12457	9.7359	11.0389	10.0051	8.60021				8.53846	8.7453	5.89274	9.08846		6.36197	9.18761
300	7.7844	10.4372	11.635	9.97992	8.29551				8.86496		6.23611	9.23098		7.36667	9.79786
310	8.19359	9.68504	10.584		9.02543						6.73739	9.85833		7.46838	10.1872
320			11.7133		9.78504						8.25342	10.1637		8.14274	10.3919
330			11.6051		10.1754						8.69829	10.5207		8.54316	10.3265
340					10.6344						9.21667	10.9996		9.77457	10.3782
350												10.4474		9.96047
360												10.3737
370
380
390
400

## Sheet: Pole_Distances_JDU440_knl-1
time from nebd (s)	embryo_1	embryo_2	embryo_3	embryo_4	embryo_5	embryo_6	embryo_7	embryo_8	embryo_9	embryo_10	embryo_11	embryo_12	embryo_13	embryo_14	embryo_15	embryo_16	embryo_17	embryo_18	embryo_19	embryo_20
0	12.6251	10.69	8.46872	11.2275	11.7999	11.2681	10.8887	11.2727	9.00597		10.9618
10	13.2399	11.3591	8.9466	11.3567	12.5064	11.3283	11.3594	11.5136	9.20071	12.8437	11.3875
20	13.0848	11.955	9.10745	11.8354	12.3015	11.7213	11.8358	11.4553	9.45322	12.9061	11.513
30	13.1623	11.7662	10.3183	11.5476	12.6004	12.2299	12.3078	11.1431	9.77187	13.2422	11.7509
40	12.928	12.0324	10.587	12.0013	12.9719	12.1862	12.3663	11.2777	10.4356	13.3318	12.1661
50	13.3682	12.1117	11.5057	11.9879	13.1913	12.102		11.3219	11.2098	13.7193	12.3192
60	13.4461	12.2869	12.5691	12.3621	12.9822	12.5332	11.6573	11.8041	11.9754	13.5709	12.2565
70	13.4338	12.6461	13.3851	12.5608	13.2445	12.7271	11.902	11.9277	12.5004	13.4256	12.5062
80	13.3143	13.0597	14.0392	12.95	13.3812	13.2616	12.3669	12.4336	12.9436	13.626	12.6197
90	13.3854	13.5183	14.6445	13.2202	13.5699	13.4291	13.158	13.0993	13.4041	13.5301	12.9259
100	13.6126	13.865	14.6605	13.8273	13.8811	13.5245	13.2997	13.312	13.5291	13.968	13.2908
110	13.8078	14.0585	14.9069	14.4516	14.1319	13.7609	13.8797	14.0344	14.0861	14.0457	13.981
120	13.9428	14.0503	14.5916	15.062	14.2656	13.7512	14.3352	14.3881	14.7963	14.5481	14.372
130	14.1774	14.213	14.8108	15.346	14.8295	14.1054	14.7689	14.5392	14.7528	14.5884	14.5012
140	14.3174	14.4105	14.6861	15.6274	14.9789	14.6179	15.1137	14.7899	15.0831	15.154	14.4682
150	14.9191	14.8727	14.893	15.5665	15.2264	15.2295	15.3124	14.7385	15.4208	15.6884	15.1731
160	15.2071	15.4375	15.9563	16.3259	16.2478	16.0319	15.5361	15.9358	16.428	17.2371	15.6184
170	16.4663	16.4231	17.3389	16.1474		17.023		16.5955	17.1519	17.9506	16.6407
180	17.44	17.5807	17.5938	18.0238	17.9165	17.528	17.3982	17.5974	18.1366	18.6055	17.1916
190	17.8268	17.9043	18.6477		18.9031	18.6411	18.0175	18.1935	18.8148	19.2459	18.1319
200	19.2672	19.3121	19.1819	18.8144	19.5178	19.4061	18.3909	18.9467	19.4782	19.9571
210	19.6708	19.5725	19.8395	20.2541	20.374	19.9485	19.0783	19.5105		20.5626	18.8229
220	20.1946	20.3151	20.0009	21.009	20.9126	19.8921	19.4669	20.2567	20.3993	21.1219	19.6681
230	20.6378	20.7887	20.4223	21.2229	21.2201	20.2864	19.6331	20.9156	20.8487	21.5134	20.0278
240	20.9502	21.1315	20.7937	21.8428	21.5348	20.7203	20.1029	20.8899	21.2965	21.7241	20.6591
250	21.3511	22.0772	20.901	21.8957	22.0181	21.0479	20.1038	21.0702	21.6431	21.9537	20.7106
260	21.4538	22.4489	21.0986	22.0814	22.2481	21.4176	20.4849	21.5394	21.8233	22.2499	20.9026
270	21.7109	22.6252	21.3558	22.2248	22.6297	21.5398	20.7314		22.0026	22.3006	21.1807
280	21.9419	22.6303	21.7521	22.1604	22.7348	21.8143	20.6796		22.2039	22.3703	21.4425
290	22.0086		21.7987	22.3933	22.8971	22.0903	20.8602		22.4769	22.6034	21.5209
300	22.0492			22.7382	23.0735	22.3119			22.625	22.7996
310				22.8911	23.1794		21.5428		22.5285	22.9402
320						22.8694				23.0311
330						22.8781				22.9351
340						23.422				22.647
350						23.4559
360
370
380
390
400

## Sheet: Pole_Dis_JDU440_knl-1+hcp-1
time from nebd (s)	embryo_1	embryo_2	embryo_3	embryo_4	embryo_5	embryo_6	embryo_7	embryo_8	embryo_9	embryo_10	embryo_11	embryo_12	embryo_13	embryo_14	embryo_15	embryo_16	embryo_17	embryo_18	embryo_19	embryo_20
0	11.1721	10.1345	10.5486		12.3645	11.8349		13.5554	11.617	12.0207	11.8993
10	12.1977	10.6082	11.0999		11.8293	11.8582	8.97405	13.7471	11.7276	12.132	11.6278
20	12.9917	10.8571	11.4086		12.2929	11.6599	9.99033	14.4474	11.9761	12.5855	12.5625
30	12.357	11.2967	11.7119		12.6006	12.6003	11.04	15.6458	12.2614	12.7789	12.3483
40	12.1119	11.9116	11.7243		12.6455	13.0289	12.0861	16.5253	12.8334	12.8255	13.6901
50	12.8511	12.2663	12.9172		13.6319	13.0822	13.7273	16.6004	13.1625	13.3967	14.3739
60	13.346	12.2515	13.0431		14.6534	14.3794	14.9877	16.4253	12.6494	13.9384	15.5333
70	14.4289	13.7973	14.1539		15.8371	14.9904	15.6012	17.1129	14.1206	14.2916	16.549
80	15.1524	14.9844	15.9246		16.8107	17.3286	17.1668	16.7507	13.777	14.7227	18.1833
90	15.2254	15.6459	17.5367		19.1727	19.6957	19.6502	16.7547	15.5925	15.9859	20.2704
100	16.5887	16.7859	18.7457		20.7077	20.9185	21.6811	19.457	15.7213	18.1783	21.0119
110	17.3802	18.0786	20.4176		22.2436	22.5899	23.2163	21.07	17.6064	20.0786	21.5699
120	19.1331	19.7066	20.5543		23.124	23.2346	24.1969	23.624	21.2745	20.4992	21.8636
130	20.1248	21.1608	21.8151		23.1015	23.5924	24.58	23.2612	22.5736	21.747	22.0146
140	21.1494	22.3467	22.2666		23.2874	24.3897	23.9402	25.6448	23.3294	23.6545	22.6967
150	21.448	23.0205	22.2537		22.8969	23.2809	23.3475	23.4626	23.9275	23.3903	22.1566
160	22.6972	22.9088	23.5479		22.4073	22.6467	22.193	23.9786	24.1813	22.8802	22.3772
170	22.2875	23.0293	23.2699		22.5726	21.8337	21.4418	23.1059	24.2607	22.1658	22.5593
180	21.9088	22.9419	22.9225		22.4514	22.2813	22.3306	22.6514	24.3695	22.217	22.084
190	21.7025	21.9027	22.5218		22.2407	21.4935	20.2225	22.2057	24.0588	21.8291	21.6978
200		21.3292	21.9108		21.4929	21.614	21.2373	22.6643	24.1501	22.4423	21.3317
210	22.4708	20.7326	21.6587		20.3894	21.253	21.5672	22.7471	23.25	22.4262	22.2885
220	22.5808	21.2403	20.5601		19.9591	22.4154	21.0841	22.5851	23.6669	21.8575	21.0751
230	21.8833		21.2962		20.2329	21.3485	21.0738	22.9803	23.0451	21.309	20.8498
240	22.3134		20.8874			21.8311	21.0692	22.9148	22.9239	20.6256	20.5247
250	22.1591		22.141		21.8004	22.5634	21.6648	23.4397	22.3074	19.9148	21.3191
260	21.5698		22.5058		21.3182	22.8723	22.231	23.68	22.5041	20.625	20.7443
270	22.4713		22.6992		21.4979	23.4366	22.4342	24.078	22.0964	22.2373	20.2259
280	21.9085		23.2358		20.9884	22.8798	22.8785	24.4842	22.4023		20.8512
290			23.5817		20.9538	22.9145	23.1682	24.219	22.3816		21.3677
300	21.543		23.6596		22.1137	22.8424	23.488		23.0386		20.1415
310	21.7341		23.8483		21.8781	22.9768	23.7039	24.4005	22.0937		20.6385
320			23.3189		21.8745	22.7321	23.7232	24.541	22.729		20.8895
330			23.1521		22.1357	22.7911	24.1195	24.4134	22.1082		21.4593
340			22.8845		21.9862	22.9257	23.6574	24.4408	21.8543
350					22.5483	22.8175	24.1124	24.0712	22.6088
360					23.0662			24.482	23.3523
370					23.0753			24.9709	23.0341
380									23.4655
390									23.3668
400									23.6707

## Sheet: Pole_Dist_JDU441_knl-1
time from nebd (s)	embryo_1	embryo_2	embryo_3	embryo_4	embryo_5	embryo_6	embryo_7	embryo_8	embryo_9	embryo_10	embryo_11	embryo_12	embryo_13	embryo_14	embryo_15	embryo_16	embryo_17	embryo_18	embryo_19	embryo_20
0	12.3496	12.7727	11.151	12.796	11.8125		10.8502	11.2401	10.7357	10.821	12.0784		12.0147	12.5088
10	12.8638	13.0445	11.9214	13.2041	11.7152		10.845	12.0415	11.0185	11.1658	11.56		12.2891	12.7518
20	13.1595	13.1186	12.32	13.6952	12.6286		10.5804	12.0201	11.3592	12.11	12.0078		12.1828	12.9158
30	13.9022	13.4466	13.3147	14.3251	13.1262	12.0097	11.3884	12.1149	11.7655	12.4197	12.3573		12.3264	13.474
40	14.284	13.8476	13.938	14.6497	13.7019	12.8234	11.7589	12.493	12.2831	12.8669	13.0308		12.381	14.274
50	14.7167	14.3184	14.48	15.3901	14.3848	13.3967	12.7004	13.0936	12.7737	13.6136	13.6592		13.0711	14.9642
60	15.4229	15.164	15.1487	16.0882	14.9639	13.7502	13.2675	13.9128	13.3311	14.1177	14.3548		13.7045	15.5306
70	16.2314	15.8511	15.6708	16.6346	15.6129	14.9502	13.9153	14.9992	14.2692	14.8562	14.822		14.5563	16.0046
80	16.911	16.4305	16.3882	17.134	16.1881	15.7777	14.6034	15.7703	14.8654	15.5526	15.4157		14.5869	15.6849
90	17.3019	17.1287	16.9022	17.2929	16.3171	16.7116	15.3161	16.1686	15.6448	16.1232	15.8174	13.2361	15.0746	14.9723
100	17.7675	17.237	17.5061	17.4433	15.9238	17.1619	15.7013	16.6784	16.105	16.8458	15.6344	13.7203		14.1458
110	17.7093	17.2357	17.7908	17.4893	15.3648	17.6846	16.0393	16.2921	16.3633	17.1258	15.0315	13.708	14.7061	13.4715
120	17.3743	16.7914	17.4652	16.8597	14.7852	17.5407	15.4872	15.6535	16.1439	16.9428	14.3677	13.6363	13.8606	13.5136
130	16.4143	16.0814	16.7635	15.8586	14.4596	16.7931	14.6893	15.0215	15.3307	16.2259	13.7304	13.3816	13.1132	13.163
140	15.6712	15.2678	16.0091	15.0603	14.0102	15.8858	14.176	14.29	14.3191	15.4562	13.1904	13.1228	12.8601	13.0177
150	14.9748	14.6524	15.5149	14.4659	13.768	15.211	14.0226	13.8248	14.0144	14.5847	12.7169	12.6809	12.8029	12.9407
160	14.5611	14.462	15.0398	13.8043	13.8492	14.327	13.4124	13.6075	13.7064	13.6458	12.9757	12.4814	12.6309	13.0792
170	14.4843	14.1611	14.3641	13.8934	13.7083	13.91	13.4871	13.228	13.9609	13.3629	13.2174	12.7894		13.0604
180	14.3936	14.0721	14.2487	14.3054	13.7317	13.8494	13.6105	12.9714	14.1882	12.9963	13.5766	12.7167	13.1585	13.3745
190	14.2828	13.8012	14.3511	14.6107	13.4003	14.1573	13.8714	13.191	14.6832	13.1051	13.8764	14.1864		13.5977
200	14.7814	13.6614	14.9347	14.994	13.8138	14.2365	13.6888	13.7788	16.6914	13.1165	14.4208	15.0559	13.9779	14.7094
210	15.4432	14.2746	15.606	15.6066	14.3323	14.6508	14.7379	14.0347	17.8272	12.8801	15.5447	16.2401		17.5898
220	16.1495	14.6397	16.5512	16.7076	15.3648	14.7857	15.5568	14.5975	19.2499	13.0946	17.0861	17.5476	16.9462	19.1467
230	17.4148	15.4078	17.6496	18.1831	17.5004		16.4048	15.0722	20.1066	13.6858	17.777	18.1038		20.3276
240	19.1976	17.0125	18.963	18.8965	19.032	17.0119	17.3243	15.911	20.9502	14.2436	19.0845	18.9488	19.366	20.6848
250	20.6941	18.9298	19.9757	20.2236	20.1523	17.8685	18.2403	18.5757	21.4523	16.065	19.3995	19.805		21.313
260	21.6035		20.6223	20.6289	20.9182	19.2623	18.9798	20.0386	22.196	17.4266	20.2849	20.4216	20.5561	22.0567
270	22.2625	20.928	21.2562	21.2523	21.9269	19.9403	19.2743		22.651	18.0056	20.5858	20.8253		21.8813
280	22.74	21.3129	22.0696	21.8847	22.2957	19.8673	19.5158	22.0056	22.679	18.6773	20.785	21.6736		22.1813
290	22.8226	21.7402	22.271	21.8131	22.8425	20.7942	19.8021		22.7236	19.3977	20.6869	21.9157		21.9543
300	23.153	21.7939	22.5733	22.4607	22.9968	21.0075	19.9054	22.9815		19.4541	21.1068	22.3823	20.7824	22.3084
310	23.1726	22.0724	22.6674	22.4674	23.3483	21.1607	20.3531	23.1698		20.3015	21.0866	22.4181	21.3315	22.2194
320	23.1053	21.8539	23.023		23.8265	21.4298	20.4164	23.558		20.703	21.4564		21.51
330	23.3012	21.7157	23.5586	22.578	23.9984		20.5945	23.6736		20.4775			21.6499
340	23.1183	22.0456	23.562	22.6779	24.3342			23.5683		20.9352			21.5085
350		22.0947		22.766	24.4559			23.4746		20.7753			22.2051
360		22.3258		22.8576	24.6214								22.2703
370		21.9235											22.3897
380
390
400

## Sheet: Pole_Dis_JDU441_knl-1+hcp-1
time from nebd (s)	embryo_1	embryo_2	embryo_3	embryo_4	embryo_5	embryo_6	embryo_7	embryo_8	embryo_9	embryo_10	embryo_11	embryo_12	embryo_13	embryo_14	embryo_15	embryo_16	embryo_17	embryo_18	embryo_19	embryo_20
0	7.89498	12.1135	10.1211	12.5452	11.0588		8.57391	11.5207	10.275	10.2637	12.3864	9.42027		10.5237	9.74264
10	9.25782	12.0972	11.4371	12.8394	11.4734		7.98034	11.5997	10.532	10.5772	12.5481	9.28396		10.718	9.9567
20	9.93685	12.7686	12.2255	13.383	11.8335		8.38695	11.7825	10.3377	10.8378	12.8767	8.97051		11.5272	10.0512
30	11.3941	12.7788	12.7971	13.2657	11.7071		8.54268	12.7109	10.2356	11.8651	14.3003	9.37005		11.0938	10.1717
40	12.2942	13.7824	13.4003	14.1545	11.8257		10.2907	13.4548	10.3051	12.6947	16.2439	9.26857		10.9207	10.4367
50	13.8229	14.3759	13.8312	15.3783	12.0353		11.6335	14.7502	11.5474	14.3626	16.988	9.49222		11.3684	10.6304
60	15.4968	15.712	14.9204	16.6465	12.6001		13.7632	15.5431	12.6091	14.8532	17.3717	9.33906		11.9654	11.3454
70	17.1379	16.6416	16.108	17.9118	13.2434		15.1584	16.2562	14.1638	15.0717	17.654	10.1806		12.1699	11.8278
80	17.4016	17.2274	16.7196	18.3985	14.3513		16.7955	16.266	14.6035	14.484	17.7264	10.6782		13.1491	12.763
90	17.5111	16.9907	17.0441	18.8253	15.3283		17.3619	16.1634	14.557	14.0465	17.6076	11.865		14.239	13.5286
100	17.1832	16.1069	17.3043	18.5484	16.5433		17.8601	15.4793	14.4593	13.7454	16.9574	12.6545		14.8405	13.6911
110	16.8952	15.5506	17.745	18.0447	16.5558		17.5767	14.5917	14.1035	13.3702	16.4487	13.6353		15.5191	14.2744
120	16.4118	14.9077	17.7687	17.866	16.5598		17.2399	13.9062	13.1939	12.5712	15.9233	14.1928		15.576	13.994
130	15.5614	14.7741	17.8401	17.4127	16.3518		16.7222	13.6817	13.0506	12.5179	15.5511	15.008		14.8542	13.3785
140	15.4063	14.7321	17.5055	17.4858	15.8182		16.2614	13.5743	12.6407	12.8816	14.9173	14.9007		14.2265	12.677
150	14.9075	14.547	17.3475	17.3245	15.6507		15.7998	14.024	12.2534	12.9687	15.0196	14.3653		13.3178	12.6909
160	15.1596	14.3306	16.8275	17.434	15.2055		16.0555	14.1191	12.6175	13.2976	14.3551	14.5598		13.0646	12.4522
170	15.5166	14.8531	16.849	17.8239	14.7235		16.0942	14.6213	12.2824	13.5311	15.6852	14.4398		13.0857	12.2352
180	15.6355	15.3535	16.3303	18.5814	14.909		16.3824	15.0729	13.1009	14.2607	16.4027	13.9342		12.7152	12.767
190	16.5363	15.6636	16.7483	18.8836	14.8093		17.1046	15.7758	13.5915	15.2385	16.9265	14.0816		12.4732	12.5117
200	16.7454	16.5867	16.4352	19.419	14.8941		17.5931	16.7838	14.444	15.1486	17.6125	14.0991		13.163	12.3596
210	17.6649	17.6074	17.4798	19.8954	15.2073		18.8329	17.7424	15.5909	17.1182	18.4259	14.2112		12.8248	12.8681
220	18.2993		17.7056	20.8514	15.5929		20.0633	18.5765	16.2145	17.344	18.6336	15.2037		13.057	13.2669
230	18.923	19.3784	18.9704	21.4398	16.2462		20.8996	19.3015	16.6048	18.2268	19.3884	15.68		13.7089	14.0466
240	19.3119	19.9937	19.457	21.6572	17.0457		21.4582	20.3597	17.5003	19.2191	20.0194	16.1093		14.1893	15.1449
250	19.6828	20.3599	20.1424	21.9456	17.6439		21.9522	20.9193	18.3883	19.6675	20.0948	17.076		15.457	15.7655
260	20.0441	20.5959	21.3048	22.2344	18.4193		22.5541	21.4681	18.8953	20.0497	20.4581	17.7469		16.0248	16.8084
270	20.4165	21.2059	21.4709	22.3984	19.1025		22.7317	21.6915	19.497	20.3915	20.9482	18.1171		16.3007	17.6062
280	20.7879	21.8605	22.235	22.4683	19.82			21.8132	19.7559	20.6435	21.3089	19.2348		17.5122	18.1085
290	21.1706	21.7658	22.6236	22.7403	20.5465			21.9287	19.9975	20.8679	22.0312	19.6383		17.6257	18.9258
300	21.4397	21.9374	22.5772	22.8533	20.6069				20.2135			20.3204		18.3819	19.4738
310	21.4695	22.1898	23.416		21.287							20.4727		18.97	19.9575
320	21.9918		23.2856		21.7604							20.5998		19.687	20.371
330			23.5261		21.9815							20.4995		20.2003	20.33
340			23.9647		21.8632							20.7721		20.7729	20.615
350					21.9567									20.9622
360
370
380
390
400
