# Supplementary material for: BUB-1 promotes amphitelic chromosome biorientation via multiple activities at the kinetochore
Source: eLife journal article supplement (doi:10.7554/elife.40690), 2018-12-14
Supplement: supp [file elife-40690-supp-v1.zip › elife_poa_e40690_Figure_2_source_data_2.xlsx]

## Sheet: Chromosome segregation
	amphitelic	merotelic	mono-oriented
JDU440_knl-1	12	0	0
JDU440_knl-1+hcp-1	0	0	11
JDU441_knl-1	2	13	0
JDU441_knl-1+hcp-1	0	15	1
