# Supplementary material for: BUB-1 promotes amphitelic chromosome biorientation via multiple activities at the kinetochore
Source: eLife journal article supplement (doi:10.7554/elife.40690), 2018-12-14
Supplement: supp [file elife-40690-supp-v1.zip › elife_poa_e40690_Figure_3_figure_supplement_1_source_data_1.xlsx]

## Sheet: Pole_Dist_WT_bub-1
time from nebd (s)	embryo_1	embryo_2	embryo_3	embryo_4	embryo_5	embryo_6	embryo_7	embryo_8	embryo_9	embryo_10	embryo_11	embryo_12	embryo_13	embryo_14	embryo_15	embryo_16	embryo_17	embryo_18	embryo_19	embryo_20
0	13.0981	12.3327	9.88177	11.8132	10.3024	9.63545	10.8801	12.7606		10.9546	12.1536	12.026	11.4106	12.2117	11.4141
10	12.9517	12.4479	10.4753	12.4525	10.2574	9.92885	10.9241	13.2026		11.5408	12.0435	12.4614	11.5531	12.0889	11.4014
20	13.0886	12.7272	10.3902	12.2746	10.3503	10.0875	11.3013	13.1755		11.927	12.6988	12.4113	12.1195	12.2956	11.2396
30	13.2475	12.801	11.0672	11.9861	10.514	10.283	11.5015	12.881		11.6147	13.0714	12.0573	12.1551	12.4869	11.2648
40	13.2393	12.7181	11.2219	12.3064	11.1725	10.5345	12.115	13.117		12.1334	12.914	12.5294	12.1	12.8478	11.6691
50	13.396	12.9123	11.8893	12.323	11.822	11.0359	12.9008	13.0965		12.2132	12.7874	13.1176	12.1955	12.7784	11.9029
60	13.5365	12.8473	12.188	12.6575	12.2855	11.6565	13.3807	12.9748		12.3448	12.936	13.4343	12.939	12.6627	12.1616
70	13.4814	12.8302	12.3537	12.9531	13.2182	11.884	13.9259	13.0343		12.572	13.1239	13.7985	13.3599	13.0444	12.394
80	13.719	13.3558	12.8196	13.5054	13.7309	12.6847	13.9215	13.2792	10.4914	12.7699	13.6075	14.4603	13.0567	12.8074	12.6884
90	13.6974	13.3787	13.0785	13.6868	14.1489	13.5281	14.649	13.7491	11.9463	13.1192	13.7354	14.6784	13.6167	13.135	13.0588
100	13.9287	13.6105	13.6492	13.9408	14.3546	14.0193	14.7962	14.1709	13.1005	13.5082	14.2747	15.1504	13.7859	13.3044	13.715
110	14.3876	13.6194	13.9207	14.433	14.8082	14.6296	15.0622	14.4827	13.7039	13.7966	14.5466	15.307	14.0573	13.8707	13.9792
120	14.336	14.0338	14.2535	14.7481	14.6038	14.6921	15.0591	14.6756	14.5783	14.1615	14.9476	15.3243	14.5281	14.0241	14.5623
130	14.7937	14.5749	14.5298	15.0975	15.0878	14.8768	14.7954	14.6824	15.2036	14.2294	14.8658	15.2122	14.6878	14.233	14.9071
140	14.8666	14.4404	14.9126	14.7521	15.2427	15.1658	14.6496	14.9482	15.6491	14.5574	14.7285	15.0773	14.5471	14.069	14.8875
150	14.6639	14.6411	14.9403	15.1651	15.558	15.5259	14.7523	15.0602		14.5465	15.0107	15.1139	14.7292	14.2763	15.019
160	14.8003	14.4167	15.0211	15.2379	17.0086	16.0025	14.9799	15.503	16.8742	15.7018	15.1948	15.2796	15.3639	13.8488	15.0862
170	15.3114	14.324	15.6587	15.7775	16.8251	16.755	16.13	16.8342	17.6192	16.09	15.2939	15.4619	16.1286	16.0281	15.0365
180	16.1793	14.2856	16.6993	16.5012	17.649	16.8816	16.755	17.7531		17.1795	15.6925	16.6891	16.9789	16.0114	14.9774
190	16.8148	15.5876	17.5581	17.7386	18.4224	18.1918	17.7027	17.9488	18.4453	17.712	16.691	17.2332	17.6276	18.1568	15.3652
200	17.3627	16.3957	18.3753	17.6209	18.3155	18.3572	18.5044	18.9671		18.2118	17.7361	17.9927	18.2185	18.36	16.6695
210	17.9712	17.3857	19.0699	18.5877	18.976	19.0615	19.3198	19.0906	19.5966	18.2231		18.93	18.7675		17.3321
220	18.3031	17.7824	19.3305	19.0025	19.1112	19.023	19.5971	20.3153	20.0877	19.2202	18.8658	19.4867	19.0022	20.3377
230	18.8246	18.094	20.0938	19.4565		19.58	20.0238	20.7248	20.417	19.3086		20.1743	19.2548		18.2485
240	19.3404	18.7247	20.451	19.7524	19.8259	19.9816	20.3534	21.1603	20.816	19.8691	19.8534	20.2372	19.6351	21.3311	19.4487
250	19.6275	19.3196	20.7525	20.1505	20.0097	20.574	20.6147	21.318	20.8807	20.0775	19.9704	21.3479	19.7997	20.9616	19.23
260	19.8713	19.3053	20.7749	20.418	20.2395	20.8859	20.9746	21.8109	20.8345	20.1266	20.6449	21.4067	20.2603	21.459	20.2663
270	20.1343	19.8836	21.0473	20.5429	20.2009	21.1549	21.2314	21.8908	21.1262	20.3355	20.8543	21.6158	20.2823	21.6185	20.4645
280	20.3769	19.9968	21.0593	20.919	20.3581	21.2133	21.4229	21.8783	21.6558	20.5591	21.1525	21.5299	20.5708	21.3398
290	20.48	20.3697	21.4305	20.8225	20.1897	21.4886	21.2875	22.2874	21.6801	21.041	21.3954	21.5881	20.7556	21.5784
300	20.7063		21.5489	21.1646	20.47	21.5659	21.4327	22.4447	21.7145	21.0707	21.3589	21.9119	20.8229	21.3625
310	20.8447		21.5521	21.1537	20.5801	21.6612	21.6345		21.998	21.1282	21.6732	21.8849	21.1053	21.9078
320	21.0934		21.7353	21.2351	20.3385	21.8557	21.9223		22.0308	21.3163		22.1177	21.1846	21.9752
330	21.1441		22.1225	21.5683	20.8254	22.0392	22.4427			21.2865		22.4428	21.3476	22.239
340	21.2991		22.3435		21.2193	22.2429	22.437			21.5149		22.4428	21.4656	22.7317
350	20.937		22.8205		21.2015	22.3316	22.497					22.8709	21.5004	22.9777
360	21.4592				20.9165	22.4504	22.8131					22.7801	20.9231
370					20.9302	22.4682						22.6356	20.8139
380					20.4908	22.2003						22.7788
390					20.3152	21.7942
400					20.3364	21.5404
410					20.8213	21.707
420					20.3494
430
440
450
460
470

## Sheet: Pole_Dist_DeltaKD_bub-1
time from nebd (s)	embryo_1	embryo_2	embryo_3	embryo_4	embryo_5	embryo_6	embryo_7	embryo_8	embryo_9	embryo_10	embryo_11	embryo_12	embryo_13	embryo_14	embryo_15	embryo_16	embryo_17	embryo_18	embryo_19	embryo_20
0	13.2783	12.1079	11.7874		11.0898	9.95483	11.8987	11.8681	11.5967	11.896
10	12.9191	11.8109	11.7394		11.2686	10.4001	11.9632	11.6923	11.4128	11.6811
20	13.1494	12.1583	12.1024		11.6389	11.0771	12.288	12.0373	11.538	11.7287
30	13.3793	12.5485	12.3832		12.0197	11.0188	11.9213	12.6252	11.9608	12.1409
40	13.4162	13.2768	12.7142	9.82116	13.0166	11.6519	12.2591	12.9995	11.9235	12.5833
50	14.0499	13.2638	13.2675	10.5572	13.5697	11.7858	12.5813	13.3439	12.4147	13.1225
60	14.4772	13.946	13.6151	11.1392	14.1696	12.3439	13.064	13.8698	13.0322	13.4716
70	14.6786	14.1622	14.0784	12.1298	14.2001	13.3748	13.3518	14.0813	13.2748	13.1883
80	14.836	14.1102	13.9644	12.872	14.0398	13.8349	13.2954	13.7955	13.7836	12.9721
90	14.7081	14.0048	13.839	13.8092	13.712	13.7522	13.3786	13.6984	13.8326	12.7622
100	14.7984	13.3913	13.8114	13.945	13.6686	13.863	13.3147	13.3591	13.7073	12.7353
110	14.7896	13.3886	14.0156	14.2763	13.6805	13.8214	13.8796	13.5757	13.5652	12.6831
120	14.8672	13.4316	13.592	14.3962	13.3679	13.7893	13.8031	13.8788	13.7541	12.5462
130	14.5254	13.3228	13.252	14.1217	13.3383	13.9	14.0771	13.7708	14.3855	12.493
140	14.4654	13.3302	13.6611	14.2219	13.3452	13.7949	13.8034	13.921	14.3179	12.6165
150	14.262	13.4392	13.4281	13.9977	13.6445	13.6404	13.6558	13.9209	14.0095	12.493
160	14.3748	13.2982	13.3368	13.7569	13.2364	13.6587	13.8843	13.8272	13.783	12.2994
170	14.1023	13.3342	13.4581	13.8278	13.6924	13.8339	13.6737	13.8188	13.4809	12.191
180	14.1997	13.1538	13.7154	13.4401	13.5492	13.9074	14.1148	13.8623	13.6362	12.3644
190	14.0248	13.461	14.0406	13.1954	14.071	13.6344	14.0275	14.1076	13.6616	12.7227
200	14.4001	13.4915	14.2412	13.1701	14.6069	14.0492	14.0061	14.443	13.716	12.7716
210	14.2116	13.4579	15.1317	13.498	17.0666	14.2048	13.9092	14.8872	14.1564	13.2088
220	14.8538	13.7597	18.9789	13.9154	19.8318	14.6325	15.745	16.5222	14.555	15.3833
230	15.2346	13.9796	20.4198	13.8393	21.3594	14.9312	17.9942	18.1185	14.7849	16.7969
240	16.5425	15.4396	21.2773	14.1249	21.9028	17.7699	19.9727	18.8075	16.9201	17.3122
250	19.9718	18.5206	21.9406	14.4012	22.5663	19.0505	20.6714	19.6713	20.5305	18.5064
260	21.6252	20.2064	22.3211	15.0429	22.8127	20.4455	21.5756	20.1068		18.8039
270	22.7802	21.6618	22.3955	17.5781	22.4405	20.6739	21.9104	20.5167	22.8112	19.2382
280	22.4542	22.1282	22.6963	20.0785	22.5572	21.2564	22.3482	20.8201	22.9857	19.1875
290	23.3179	22.76	22.7659		22.1754	21.4697	22.6989	21.1027	23.1542	18.908
300	23.3325	22.6338	22.7997	21.8841	21.9238	21.8458	22.8264	21.2356	22.4542	19.3108
310	23.4645	22.9855	22.5526	21.8102	21.9572	21.2595	22.5068	21.0505	22.5422	19.4998
320	23.0103	22.5935	22.4136	22.2137	21.6595	21.8895	22.2586	20.2961	22.8662	19.9754
330	22.9942	22.3584	22.3907	22.1292	21.8117	21.6056	22.0302	20.7962	22.6134	19.9299
340	22.7241	21.9288		22.051	22.3067	21.2806	22.0957	21.0144	22.6425	19.9567
350	22.4966	21.986		22.1996	22.4296	21.6602	22.2627	21.1096		20.0469
360		22.3535		22.1099	22.6639	21.388	22.1439	21.2872	22.7125
370		22.247		22.1347		21.6107		21.5738
380	21.9695	22.5935		22.3625		21.56
390	21.876	22.5951		22.1945		21.6345
400	21.9335	22.9475		22.2357
410		22.8705		22.6129
420		23.2365		22.6975
430		23.5935
440
450
460
470

## Sheet: Pole_Dist_KR_DN_bub-1
time from nebd (s)	embryo_1	embryo_2	embryo_3	embryo_4	embryo_5	embryo_6	embryo_7	embryo_8	embryo_9	embryo_10	embryo_11	embryo_12	embryo_13	embryo_14	embryo_15	embryo_16	embryo_17	embryo_18	embryo_19	embryo_20
0	10.8654	10.1711	12.2125	10.0509	9.94181	12.066	11.5343	10.0113	8.9709	11.4769	9.4604	8.7999
10	11.4799	10.5589	12.0667	10.5917	10.7967	11.9963	11.5263	10.31	9.13553	11.7068	9.54757	8.87887
20	11.49	10.7402	12.8121	11.0298	10.6938	12.0564	11.858	11.1873	10.0375	12.218	10.2048	9.90245
30	11.5116	11.3052	13.0365	12.2996	11.3605	12.6588	12.1981	12.0807	11.3101	12.232	10.4947	9.13633
40	11.9799	11.3708	13.5251	13.0552	11.3079	13.4835	12.4375	12.7121	11.7988	12.755	11.8597	10.2298
50	12.8654	11.5036	13.8371	13.4288	11.528	13.9335	12.5485	13.1394	12.551	13.5107	13.1033	10.7515
60	13.3838	11.8124	14.4402	13.9696	12.5279	14.6365	13.4299	13.8688	13.4458	14.1532	13.6317	11.718
70	13.8068	12.5681	15.0917	14.3531	13.055	15.1929	14.2008	14.1419	14.1948	14.8016	14.5031	12.6358
80	13.8549	12.9545	15.2335	14.6925	13.5853	15.4406	14.9853	14.357	14.7313	15.3954	14.6853	13.2613
90	14.038	13.463	15.3207	15.295	13.9688	15.2642	15.5779	14.7523	14.8599	15.3932	14.5995	13.8139
100	14.5329	13.4287	15.4899	15.5036	14.8293	15.3817	15.9734	15.029	15.4049	15.6187	15.0608	14.0864
110	14.7558	13.7721	15.3757	15.589	14.9321	15.3155	16.1861	15.1178	15.6821	15.5021	14.9418	14.3938
120	15.0096	14.129	15.3952	15.3921	15.193	15.198	15.8699	15.1646	15.6462	15.5724	15.0602	14.611
130	14.7256	14.4416	15.2823	15.4515	15.2163	15.3004	15.9631	14.9383	16.1618	15.4375	15.1815	14.6734
140	14.6736	14.3573	15.4375	15.1242	15.1367	15.2112	16.1895	14.73	15.5725	15.2295	14.8394	14.7051
150	14.5357	14.2315	15.4103	15.1575	15.1088	15.221	16.0863	14.4799	15.6823	14.9453	14.5425	14.6315
160		14.2497	15.1371	15.2121	15.1219	15.1516	15.8827	14.7783	15.0937	14.772	14.7067	14.5906
170	14.5489	14.4391	15.2806	15.0903	14.6094	14.8288	15.8198	14.8474	15.2584	14.7012	14.6911	14.3064
180	14.8851	14.2888	14.5188	14.8711	14.6685	15.0366	15.6936	14.9403	14.8831	14.6719	14.5781	14.1078
190	15.7753	14.5593	14.6203	15.814	14.6587	14.572	15.4098	15.217	15.5991	14.4455	14.6207	14.5821
200	16.6481	15.4262	14.6112	16.6642	14.4495	15.3268	15.5035	15.8171	16.1395	14.8873	14.735	15.2947
210	17.4174	16.3445		18.0029	15.2033	15.6706	16.0031	17.1798	16.3183	16.7307	15.4954	16.5221
220	17.9607	17.2193	16.3766	17.6467	16.1098	17.4421	16.6072	18.0026	17.3087	17.9112	16.4807	17.0256
230	18.6554	17.9269	17.5621	18.993	17.0826	18.1523	17.5461	18.9788	18.3041		17.0853
240	18.9196	18.4254	18.6594	19.207	17.6538	19.2093	18.0739	19.0725	18.8471	18.819		18.3474
250	19.2579	19.1268	19.3959	19.5111	18.2161	19.8819	18.7491	19.7295	19.3955	19.9062	18.6323	18.7068
260	19.406	19.574	19.6145	19.5576	18.7697	20.2471	19.3345	19.6595	19.8822	20.0601	19.412	19.2516
270	19.6321	19.8732	20.208	19.669	19.0926	20.548	19.7407	19.5846	20.3936	20.5644	19.3775	19.321
280	19.8007	20.1146	20.4824	20.1458	19.2691	20.9954	20.1102	19.909	20.5365	20.075	19.4475	19.9322
290	19.7079	20.4381	20.4183	20.0657	19.8139	21.4232	20.0218	20.1922	20.7251	20.1002	19.6831
300	19.9341	20.7072	20.3391	20.6738	19.9848	21.597	19.9586	20.5405	20.8491	20.145	19.4942
310	20.395	20.3422	20.2586	20.8505	19.606	21.7989	20.0101	20.7759	20.9411	20.2487	19.5052
320	20.7338	20.609		20.8185	20.1516	22.4761	20.3624	20.774			19.8428
330	21.0567	20.481		21.0102	20.4412	22.7683	20.3106			20.7258	19.7864
340	21.0127	20.6096	21.0782	21.4765		23.2028	20.4075			21.1223
350			21.7685			23.4152				21.5608
360			21.9923			23.9958
370			21.7941
380
390
400
410
420
430
440
450
460
470

## Sheet: Pole_Dist_DN_bub-1
time from nebd (s)	embryo_1	embryo_2	embryo_3	embryo_4	embryo_5	embryo_6	embryo_7	embryo_8	embryo_9	embryo_10	embryo_11	embryo_12	embryo_13	embryo_14	embryo_15	embryo_16	embryo_17	embryo_18	embryo_19	embryo_20
0	10.6768	9.91912	10.0931	12.5043	12.5451	12.008	12.127	11.004	12.2256	12.0369		12.2561	10.7887
10	10.7089	10.8241	10.2884	12.6554	12.4822	12.1376	12.3516	11.1706	12.0306	12.5116	12.2168	12.211	10.6606
20	10.6426	10.8583	10.8494	12.1616	12.368	12.1464	12.7436	11.8825	12.0999	12.7947	12.1102	12.2821	10.9846
30	11.0616	11.2139	11.3302	12.2613	12.5832	12.1151	12.8423	12.0895	12.5024	13.1867	12.9835	12.8133	10.8561
40	11.4188	12.0404	11.0481	12.7577	13.4497	12.8115	12.7756	12.1713	12.4921	13.3521	13.73	13.0547	11.4026
50	12.0791	12.3965	11.6998	13.418	14.185	13.6489	13.3885	13.0687	12.3793	13.5338	14.7178	13.4971	11.7811
60	12.907	13.276	12.1374	13.6545	14.8058	14.1982	14.2998	13.6673	12.92	14.4368	15.4995	14.038	12.5238
70	13.2184	14.3266	12.7468	14.0076	15.5376	14.7422	14.918	14.7419	13.6091	15.2987	15.8847	14.226	13.3513
80	14.3598	14.4817	13.1797	14.351	16.2099	15.2558	14.9446	15.2224	14.3135	15.6192	16.249	14.6482	13.8114
90	15.3135	14.2537	13.6165	14.9238	16.4241	15.8687	14.8598	15.6403	14.8756	15.9683	16.2676	14.8864	14.5366
100	15.8794	14.8264	14.1386	15.1205	16.554	16.2728	15.2474	15.5313	15.2616	15.8045	16.0976	15.1783	14.7243
110	16.1373	15.4324	14.3966	15.266	16.5699	16.451	15.1679	15.5413	15.2219	15.9347	16.208	14.9554	14.7084
120	16.4075	14.724	14.6231	15.1288	16.7605	16.7579	15.0205	15.7583	15.3948	16.1829	15.8666	15.2563	15.1484
130	16.5382	15.247	14.4382	15.1912	16.3341	16.8123	14.896	15.614	15.4048	15.4477	16.0163	15.1741	14.9392
140	16.4972	14.9319	14.855	14.6587	16.0987	16.6857	14.987	15.3932	14.9532	15.5773	15.8653	15.4138	14.7598
150	16.4032	15.2927	15.03	15.3604	15.8379	16.4071	14.7292	15.2942	14.5786	15.7031	15.4034	15.6753	15.2239
160	15.6612	16.0065	15.1306	15.4493	16.1681	16.1251	15.4516	16.2867	14.5327	15.768	15.4885	16.4434	15.5518
170	16.834	16.8184		16.8903	17.1273	17.2155	16.7355	16.6106	14.8659	15.9251	15.9791	16.4335	16.4301
180	16.8343	17.8022	16.6861	16.6881	18.1911	17.9142	16.9399	17.9249	15.9305	17.2673	16.9878	18.1495	17.1883
190	19.1684	18.4398	17.1095	18.8034	18.7452	18.1611	18.0816	17.8681	16.7698	18.2862	18.1482	18.4648	17.8611
200	19.8158	18.8466	17.9198	19.1832	18.893	19.6349	18.4587	19.4502	17.6413	19.038	18.7873	18.4145	18.7286
210	20.8307	19.5723	18.0588	20.2272	19.6835	19.6046	19.0507	19.6365	18.0234	19.9081	19.587	19.3882	18.6093
220	21.0149	19.7319	19.1494	20.206	20.1556	20.4817	19.4487	20.3169	19.3111	19.8554	19.9472	19.8869	19.4461
230	21.7935	20.4216	19.2068	20.6839	20.4183	20.9042	19.8344	20.6792	19.6324	20.8381	20.5499	19.9718	19.3555
240	22.1893	20.5383	19.5715	20.9221	21.1303	21.0096	19.9839	20.8298	20.2684	21.0818	20.7662	20.6092	20.0728
250	22.2443	20.7924	19.7687	20.9885	20.9218	21.1257	20.0479	20.7707	20.8306	20.9084	21.1753	20.6125	19.9817
260	22.3457	21.0311	20.0227	21.4194	20.9897	20.9787	20.3233	20.7849	20.554	21.2858	21.1872	20.7546	20.6764
270	22.2949	21.4906	20.3486	21.2117	21.6662	21.4148	20.2597	21.1354	20.9977	21.5663	21.2653	20.8129	20.649
280	22.4638	21.5244	20.4096	21.199	22.1158	21.4813	20.539	21.2814	20.879	21.8071	21.5553	20.8342	20.9221
290		21.7852	20.4875	21.5617	22.2437	22.1261	20.4561	21.3362	20.9381	21.6978	21.7119	21.0924	21.0873
300		21.7224	20.7627	21.6098	22.8206	22.3835	20.8121	21.7102		21.9316	21.9959	21.152
310		21.8132	20.8643		22.9269	22.6724	20.7686	22.0813		22.0159	22.3051	21.5
320			21.1233		22.5946		21.249	22.3309			22.8125	21.7861
330			21.2531				21.3976	22.6214			23.1083
340			21.4466								23.6523
350
360
370
380
390
400
410
420
430
440
450
460
470

## Sheet: Chr_Span_WT_bub-1
time from nebd (s)	embryo_1	embryo_2	embryo_3	embryo_4	embryo_5	embryo_6	embryo_7	embryo_8	embryo_9	embryo_10	embryo_11	embryo_12	embryo_13	embryo_14	embryo_15	embryo_16	embryo_17	embryo_18	embryo_19	embryo_20
0	8.67115	7.46325	7.6391	5.51432	5.50727	4.03162	4.70299	5.40983		4.66667	3.92842	4.32991	6.04829	7.46325	6.59637
10	6.59637	5.66987	6.97906	4.25278	4.3282	5.00919	4.7015	3.72436		4.01346	4.23654	5.88205	5.23675	6.47692	6.98077
20	5.78013	5.58333	6.04402	4.07457	4.81026	5.72735	5.27265	6.11239		5.73077	3.76709	6.48568	4.98034	5.98312	4.24573
30	6.02094	5.16026	6.66795	4.83056	5.12927	4.23825	3.39573	5.32265		4.20791	5.49081	6.09551	5.73846	6.50855	4.93098
40	6.56239	5.12863	5.9735	5.73803	2.84936	3.65128	3.3859	5.84637		3.7609	5.59167	6.1515	3.6312	6.08355	4.87628
50	5.83611	4.88611	6.17863	4.18846	2.77372	2.78141	2.63526	4.26859		3.73248	4.05769	5.13825	3.3953	6.25	4.49551
60	4.91047	3.67692	4.90577	4.66987	3.38269	3.33846	2.90021	3.50534		3.87607	3.1765	3.86432	4.3532	5.57714	4.05427
70	2.55321	3.32244	3.70748	3.76261	3.08269	3.35449	2.96239	2.91603		3.27949	3.27735	3.53568	4.16111	3.73974	3.36923
80	2.77778	4.08718	2.40385	3.32265	2.49188	3.46603	3.1485	2.59957	4.79808	2.83568	2.63056	3.10021	2.93376	3.49316	2.89701
90	2.30128	3.95021	2.76389	2.9703	2.77051	3.42244	2.38056	2.4515	4.20769	2.63697	3.05791	2.99573	3.48376	3.44039	2.62778
100	2.11774	3.3141	2.40385	2.3468	2.66133	2.83825	2.72714	2.2218	3.10299	2.59957	2.48333	2.29765	3.11474	3.03739	2.39188
110	1.95962	2.37094	2.7782	1.94444	2.31197	3.35961	2.25235	2.00235	2.89231	2.41859	3.06539	2.4062	2.66133	3.0453	2.5562
120	2.0765	2.86496	2.53333	2.19273	2.94637	3.4812	1.81581	1.82329	2.75214	2.16068	2.27265	1.92607	1.98739	2.96709	2.36496
130	1.86966	2.33312	2.01945	2.50385	2.41752	2.88184	1.98034	2.11667	2.37735	2.11667	2.21346	2.19017	1.97073	2.49017	2.46239
140	1.57671	2.94444	2.03974	2.44615	3.32479	2.41004	1.92436	1.99445	2.40278	1.99445	2.34316	2.08397	2.19594	2.91517	2.30128
150	1.89252	2.99573	2.04103	2.12073	4.7265	2.17436	1.83803	2.0641	2.34936	2.64402	2.11325	2.14744	2.47863	3.1765	2.11325
160	1.75919	1.97906	2.35278	2.27137	5.59487	3.32543	2.43098	2.69017	4.09039	4.17137	1.77564	2.13675	3.26154	3.57115	2.22372
170	3.12414	2.13803	2.9703	2.57799	6.74038	4.48483	3.63248	4.5218	5.63227	5.59872	1.9765	2.61816	4.69893	3.2015	2.30128
180	4.40513	2.28034	4.91966	4.12393	7.34701	5.99722	4.95214	6.27286	6.14765	6.4953	2.79872	4.18846	5.91239	5.64039	2.32179
190	5.47885	4.4985	6.24188	6.02393	8.2344	6.91474	6.61325	6.95064	6.84103	6.79167	4.47735	5.82286	6.74209	7.26261	3.01624
200	6.09786	5.55598	7.40962	6.46004	8.10064	7.35577	8.26325	7.92073	7.16688	7.54444	5.78141	6.89445	7.29017	8.1282	4.75556
210	7.04979	6.3359	7.58782	7.43611	8.19038	7.75021	8.40406	8.67372	7.41603	7.79872	6.45363	8.04295	8.07607	8.67244	6.26731
220	7.68611	7.15385	8.45385	7.7782	8.9547	8.00897	8.59957	8.89936	8.09359	8.18974	7.36111	8.88055	8.16752	9.73718	7.74145
230	7.77265	7.54915	8.35556	7.88611	8.89979	8.8344	9.03205	9.35748	8.27714	8.2438	7.59701	8.92244	8.43419	9.36474	8.65278
240	8.24359	7.61944	8.98611	8.36902	9.05043	8.92137	9.43098	10.0568	8.41538	8.72051	8.22799	9.65812	8.79402	10.3551	8.54124
250	8.37585	8.41816	9.57137	8.46944	9.55833	9.16838	9.77265	10.1256	8.33355	9.44359	8.84637	9.82906	8.74915	10.3513	8.85983
260	8.58633	8.72008	9.67714	8.60769	9.97457	10.0891	9.91282	10.4254	9.0594	9.78547	8.68376	10.0408	9.03846	10.9654	9.05449
270	8.55791	8.6968	10.0361	9.04915	10.1643	9.92286	10.2329	10.6002	9.12372	9.77585	9.43633	10.2598	9.72457	11.4981	9.70107
280	9.38034	8.88953	10.4812	9.27756	11.1004	10.1293		10.7489	9.70342	10.1829	9.7641	10.6605	9.89915	11.5387
290	9.20812	9.84573	10.6291	9.33739	10.6521	10.5936		11.4955	10.0633	10.3015	9.92115	10.6316	10.1605	11.9545
300
310
320
330
340
350
360
370
380
390
400
410
420
430
440
450
460
470

## Sheet: Chr_Span_DeltaKD_bub-1
time from nebd (s)	embryo_1	embryo_2	embryo_3	embryo_4	embryo_5	embryo_6	embryo_7	embryo_8	embryo_9	embryo_10	embryo_11	embryo_12	embryo_13	embryo_14	embryo_15	embryo_16	embryo_17	embryo_18	embryo_19	embryo_20
0	4.8203	5.20342	3.89914	6.65299	5.02927	9.00192	6.63761	8.57521	7.55449	8.46068
10	5.33846	4.7641	2.88077	7.08397	4.47415	8.37714	5.14872	7.79274	5.80919	6.85961
20	4.13483	3.97778	3.9406	6.63611	4.04231	6.36773	5.16816	6.75641	6.14338	4.83056
30	4.98632	5.69573	4.41474	6.49679	2.92799	5.7359	5.27436	5.24188	5.94188	3.92628
40	3.67692	4.80235	3.7282	5.02286	3.62692	4.43376	5.12628	4.55598	5.38056	3.73355
50	4.03034	3.75983	3.15406	3.94316	3.53697	5.61004	3.77799	3.5985	4.41966	3.81111
60	4.78483	3.6797	3.23355	3.37778	3.58461	4.08226	4.17927	3.32735	3.87008	3.93162
70	4.93974	3.91859	3.37479	4.18056	2.6765	3.59338	2.97863	2.94573	3.49316	3.7656
80	3.23739	4.58098	2.93419	3.79701	2.64402	4.38333	2.6109	2.80278	3.10791	3.00769
90	3.47543	5.18611	3.75876	3.56987	2.90727	3.16389	2.60491	2.57308	3.225	2.77051
100	3.22949	3.3188	2.7859	2.83568	2.51816	3.07479	2.65705	2.51581	2.56966	2.65705
110	2.98205	2.91902	2.96239	1.91773	2.05449	3.17521	2.39188	2.30256	3.02414	2.44679
120	2.43633	2.6109	2.79231	2.89231	2.32543	3.09145	2.15342	2.13932	2.7468	2.75769
130	2.57308	2.53397	2.50192	2.27244	2.04081	3.45235	2.20833	2.5641	2.67094	2.96175
140	2.57308	2.08953	2.30684	1.93761	1.9453	2.46239	1.82329	1.8765	2.43269	2.53397
150	2.51816	2.15342	1.93483	2.66688	2.35897	2.31923	2.08953	2.36004	2.86325	2.08953
160	2.12479	2.1141	2.15556	2.23654	2.21261	1.82564	1.93568	2.52479	2.28205	2.2
170	2.41966	2.13803	2.14744	2.45085	2.00705	2.01368	1.89701	2.26645	2.83974	2.35598
180	1.98034	2.1532	2.0765	1.82009	1.85726	1.75705	1.64915	2.08953	2.20256	2.46944
190	2.29359	2.17436	2.0765	2.66688	1.99551	1.75705	1.97073	2.05513	2.43633	2.52137
200	1.99551	2.27244	2.37735	2.70748	2.70278	1.76838	2.06133	2.40919	2.17906	2.59615
210	1.89658	2.05449	2.92115	1.95577	4.94338	2.01154	2.14872	2.32735	1.85812	3.47222
220	2.29701	1.91111	7.12137	2.26239	9.21239	1.98291	3.7938	4.9453	2.37992	5.6015
230	2.46944	2.29359	9.90021	2.37094	11.3983	2.91603	6.99102	6.85449	2.45085	7.48718
240	4.18056	4.16838	11.2457	2.02457	12.2318	5.92201	9.68056	8.59103	5.09295	7.95085
250	8.10897	7.75299	12.2609	2.33632	13.138	8.25363	10.2457	9.31688	9.4062	9.03034
260	11.0049	10.1694	12.8241	2.78141	13.5494	10.1312	11.7479	9.9344	11.635	9.40727
270	13.2066	11.9472	13.3846	7.0688	13.5568	10.9618	12.0453	10.3808	13.3654	10.0408
280	13.4209	12.7231	14.1545	9.43291	14.0098	11.5139	12.566	10.737	14.3656	10.3908
290	14.3987	13.3882	13.8062	10.9571	14.3827	12.0165	13.2857	11.1532	14.5515	10.0818
300	14.3735	12.9498	14.143	12.1023	14.0667	12.4733	13.5714	11.3863	13.8186	10.4686
310	15.0654	14.3036	14.6158	12.8468	13.6539	12.2032	13.475	11.7383	14.4434	10.6541
320	14.6186	13.8934	14.6075	13.0793	13.9748	13.0703	13.6496	11.484	15.5551	11.3017
330	14.6011	13.9145	14.9859	13.7936	13.5374		14.0348	12.0421	14.8485	11.6714
340	14.8876	13.4923	15.2795	13.107	14.4609			12.5414	15.3788
350	15.1295	14.244	15.2464	13.4216				12.6765	16.0617
360	15.306	14.1444		13.7199
370	15.8348	14.9355		13.9167
380		14.9297		14.316
390		15.0143		14.662
400
410
420
430
440
450
460
470

## Sheet: Chr_Span_KR_DN_bub-1
time from nebd (s)	embryo_1	embryo_2	embryo_3	embryo_4	embryo_5	embryo_6	embryo_7	embryo_8	embryo_9	embryo_10	embryo_11	embryo_12	embryo_13	embryo_14	embryo_15	embryo_16	embryo_17	embryo_18	embryo_19	embryo_20
0	6.96581	4.87714	5.30128	4.58782	9.27564	8.57692	5.64124	2.71966	10.4329	7.21197	9.03782	6.81752
10	6.22222	5.33953	4.05556	5.61197	7.57137	6.24829	6.4344	3.26239	9.86026	5.21645	8.10406	5.44765
20	5.70235	5.08697	3.98162	4.77585	6.87457	5.22863	5.6703	4.28825	6.78483	3.99423	7.38825	5.31859
30	4.21731	5.02885	3.37842	4.52329	6.34274	4.75128	5.71303	3.41068	5.51389	4.86111	6.56239	5.25812
40	3.49658	4.92286	2.94872	4.34701	5.85598	5.42863	3.83355	3.60363	4.91047	3.92842	4.74167	4.27885
50	3.27628	3.97137	3.53633	4.13654	5.35897	4.1641	4.17372	6.47842	4.07906	2.78141	4.00449	3.84872
60	3.20833	3.8547	3.97457	3.96944	4.43034	4.6515	3.89658	4.64936	3.55983	3.5312	4.44231	3.24359
70	3.49081	2.93333	4.21667	3.78504	4.21859	6.23056	3.79915	3.42179	3.13462	3.07265	4.12991	3.66239
80	3.70983	2.64402	3.30491	4.01026	3.12906	3.42244	4.52991	2.70748	2.96838	2.92799	3.72692	4.27949
90	2.85705	2.10449	2.88184	2.93675	3.49231	3.52393	4.04979	2.50919	3.18932	2.29701	4.86838	3.58461
100	2.14145	2.61902	2.52927	3.15406	2.9547	3.19872	3.04273	1.8032	2.72607	2.35791	3.98675	2.87115
110	2.30684	2.52628	2.31133	2.54829	3.0453	3.25534	2.45085	2.28355	2.29915	2.48782	2.65919	3.16133
120	1.73291	2.23547	2.3515	2.99487	3.11111	2.79872	2.57308	2.0765	2.34936	1.98419	2.0765	3.49295
130	1.93483	2.23547	2.03718	2.60833	2.17906	2.30684	2.42585	2.57308	2.50513	1.68846	1.85192	2.50107
140	2.30684	2.54231	2.31133	2.55321	2.10919	2.31902	2.41966	1.99936	2.01581	1.91111	2.20919	2.52414
150	1.71538	1.78056	1.83803	2.29701	2.16261	2.00577	1.86966	2.2891	2.27585	1.97521	2.27927	3.23355
160	1.56688	1.84915	2.23547	2.00705	2.12479	1.93483	2.11774	2.27585	2.14274	1.84765	1.84915	2.0765
170	1.88568	1.60064	2.01709	2.2	2.14274	2.08504	1.91645	1.78056	2.87115	1.89252	1.8032	2.21838
180	2.3515	1.9453	1.78483	2.61496	1.9453	1.79338	2.01709	2.32543	2.57393	2.1141	1.57671	2.64295
190	3.90449	2.18483	2.11774	3.12906	2.05577	1.97009	1.98034	2.64402	2.48782	2.23077	1.75919	2.59273
200	5.23825	3.43056	3.12735	4.91197	2.23547	2.56517	1.91111	4.07735	3.4688	3.42628	2.45897	4.58162
210	6.02094	5.02073	3.71816	6.26816	3.00577	4.23184	3.12414	5.98333	5.67714	5.42863	3.66303	5.53397
220	6.76966	6.8468	5.49679	7.45278	4.40962	6.2032	4.72992	7.75705	6.65192	7.07991	5.30385	6.70577
230	7.12393	7.39808	6.75705	7.69551	6.24231	6.80385	5.80962	8.84594	6.97607	8.08611	6.35214	6.99316
240	7.41603	7.59316	7.9218	8.23526	7.08547	8.17222	6.33953	9.82414	7.82735	9.30769	7.43611	8.09124
250	7.93184	8.67564	8.36282	8.74017	7.45684	8.78355	7.64231	10.2637	8.23013	10.0387	7.95342	7.84444
260	8.13654	8.9032	9.04594	8.91795	8.6062	9.16923	8.12372	10.2981	8.58996	10.4485	8.78697	8.87842
270	8.54722	9.26282	9.34786	9.08355	8.96709	9.82414	8.27992	10.2981	8.83803	11.1667	9.31197	9.1282
280	9.25833	9.68504	9.63547	9.78718	9.40406	10.4485	8.96987	10.6564	9.57308	10.9318	9.62137	9.49402
290	9.94509	10.0577	10.0577	10.5464	9.47073	10.5222	9.01752	11.5949	9.89487	11.2365	9.74765
300	10.0633	10.6126	10.553	10.3338	9.82927	10.7466	9.52179		9.78504	11.5528	10.0451
310	10.8938	10.5419	10.9707	10.6468	10.0348	11.0564	9.61197		10.5308	12.4677	9.92051
320	11.1848	10.8808	10.925	10.772	10.2271	11.1096				12.1417
330		10.9716			10.2981
340
350
360
370
380
390
400
410
420
430
440
450
460
470

## Sheet: Chr_Span_DN_bub-1
time from nebd (s)	embryo_1	embryo_2	embryo_3	embryo_4	embryo_5	embryo_6	embryo_7	embryo_8	embryo_9	embryo_10	embryo_11	embryo_12	embryo_13	embryo_14	embryo_15	embryo_16	embryo_17	embryo_18	embryo_19	embryo_20
0	7.30427	10.9791	6.7906	7.50598	7.20214	7.34487	7.85748	5.16026	7.54915	6.24338	5.69979	6.21133	5.21645
10	6.91474	9.1282	5.39252	7.57137	5.0844	6.3968	5.45983	4.35171	7.73205	6.31667	4.52329	6.59936	6.1797
20	6.50641	7.58098	4.41816	6.26944	5.86175	5.78846	5.57778	4.94338	6.28483	5.73568	3.89914	5.41496	4.23526
30	6.72115	6.37265	4.71816	6.97051	5.70192	3.90171	5.075	3.7391	5.83397	5.03291	3.93355	4.28291	5.02927
40	5.13803	5.99145	4.9	5.49167	5.62714	4.47415	4.2047	4.89167	5.78013	4.74658	3.03269	4.48782	4.9765
50	4.50748	3.91154	3.28633	5.15427	4.84338	4.23654	4.55897	5.77329	4.41816	3.98675	4.34466	5.20726	4.45256
60	5.54359	5.6703	3.12414	4.51026	4.2047	5.39893	4.91496	4.18782	4.80171	4.85427	4.46218	3.86987	4.01154
70	4.40513	4.38654	3.27714	3.95598	4.91496	4.28291	3.92329	4.04038	4.33953	3.80705	4.87671	3.64359	5.84444
80	3.15406	4.43483	2.41752	3.1797	4.63184	5.51389	3.98932	4.77265	5.00192	4.5047	3.45492	3.06603	4.20278
90	3.63526	3.23974	4.6297	3.43803	5.55598	4.32543	3.56197	5.33376	5.7015	5.15833	3.98162	3.21773	5.35897
100	3.44551	3.18526	3.37842	3.65	4.21197	4.13098	2.6391	3.02863	5.92586	3.94316	2.61218	2.70748	4.39167
110	2.74017	3.37778	2.48483	2.97521	3.06603	3.43056	2.78141	2.12479	4.28825	5.83611	2.16624	2.96239	3.26859
120	2.86774	3.28633	2.74017	2.86774	3.64359	4.25748	2.87115	2.41004	3.51603	3.66239	1.92842	2.92372	3.3859
130	2.4938	2.26239	2.89231	2.74017	3.56773	3.57692	2.70662	2.65064	3.3844	3.10961	2.08504	2.7859	2.70278
140	2.7859	2.96838	2.80961	2.64295	3.65	3.13718	2.4938	2.72158	3.16282	3.12414	1.94402	2.0765	2.83568
150	2.52927	2.23547	2.04081	2.74017	2.68205	4.29551	3.06346	3.0485	2.85086	2.26346	1.94402	2.71026	2.44765
160	2.22628	3.0218	2.30128	2.63526	3.13141	2.0656	2.81047	4.09038	2.95128	1.89252	2.3547	3.87842	2.4938
170	2.63632	4.09957	3.81303	3.63312	3.3859	3.18932	4.17009	5.77094	3.39573	2.83825	2.01453	4.66453	4.11496
180	3.88803	5.48996	5.31517	5.41731	4.71645	4.87265	5.04551	6.22927	3.13718	4.1015	4.66624	5.83226	5.62094
190	5.55962	6.21944	6.21944	6.30043	6.0609	5.68462	6.2438	6.48312	5.06902	6.24829	5.35128	6.50641	7.16966
200	6.68825	6.83504	6.90406	7.0688	6.17393	6.2297	6.54722	7.3703	5.99808	6.87051	6.86132	6.77244	7.47992
210	7.28718	7.32778	7.55449	7.30705	6.71667		6.91026	8.08077	6.45363	7.41047	6.85235	6.98013	7.4782
220	7.61538	7.38034	8.37222	6.88227	7.09573		7.19509	7.91111	7.33932	8.21346	7.6265	7.08718	8.13953
230	8.68419	8.31752	7.40812	8.44103	7.27778		7.51966	8.59338	7.47992	8.31987	8.3062	7.69551	8.50684
240	8.36368	8.17842	8.22799	8.33355	7.85748		8.13098	9.16667	7.81047	8.58761	8.53654	8.33825	8.86432
250	9.32073	8.66496	8.85021	8.77115	8.33355		8.2906	9.1906	8.34103	9.16709	9.08675	8.78419	8.93974
260	9.49466	8.79573	9.12265	9.36945	8.41453		9.27671	9.44081	8.90513	9.49637	9.43291	8.76539	9.55855
270	9.80171	9.42863	9.21346	9.61197	8.68974		8.7735	9.71218	9.20577	9.74765	9.65235	9.71282	10.2827
280	10.0286	9.41517	9.87949	10.1203	9.62201		9.52521	10.7897	9.70043	10.3904	9.99915	9.76026	10.3675
290		9.84038	10.0126	9.81624	9.48397		9.86132		9.42885	10.6258	10.7211	9.85	10.5205
300
310
320
330
340
350
360
370
380
390
400
410
420
430
440
450
460
470
