# Supplementary material for: BUB-1 promotes amphitelic chromosome biorientation via multiple activities at the kinetochore
Source: eLife journal article supplement (doi:10.7554/elife.40690), 2018-12-14
Supplement: supp [file elife-40690-supp-v1.zip › elife_poa_e40690_Figure_3_figure_supplement_1_source_data_2.xlsx]

## Sheet: HCP-1
HCP1 WT	HCP1 DKD	HCP1 K718R;D847N	HCP1 D814N
56.324	11.3983	102.564	89.8843
72.3754	15.0044	151.446	221.764
118.703	5.77395	188.291	236.94
138.063	17.8958	88.9834	67.7005
100.332	4.16086	104.248	145.114
213.096	-13.6354	88.9286	103.992
83.8811	18.4342	60.4055	138.734
68.3455	4.68093	89.8257	229.606
74.2129	1.70687	65.6273	225.759
74.6668	7.43155	20.2109	53.3345
			170.949

## Sheet: BUB-1
BUB1 WT	BUB1 DKD	BUB1 K718R;D847N	BUB1 D814N
66.0618	371.957	84.5546	100.767
106.248	199.407	133.916	200.803
94.9882	299.099	154.224	201.942
139.34	314.448	141.513	122.201
61.1118	205.893	141.154	133.366
150.799	239.005	149.836	136.631
91.2966	255.076	98.5851	132.233
95.5572	340.652	142.812	147.256
113.408	323.605	120.415	192.099
81.1893	290.647	86.8034	88.8427
			133.739
