# Supplementary material for: BUB-1 promotes amphitelic chromosome biorientation via multiple activities at the kinetochore
Source: eLife journal article supplement (doi:10.7554/elife.40690), 2018-12-14
Supplement: supp [file elife-40690-supp-v1.zip › elife_poa_e40690_Figure_3_figure_supplement_1_source_data_3.xlsx]

## Sheet: Sheet1
	amphitelic	merotelic	mono-oriented
WT_bub-1	15	0	0
Delta_KD_bub-1	12	1	0
K718R_D847N_bub-1	12	0	0
D814N_bub-1	14	0	0
