# Supplementary material for: BUB-1 promotes amphitelic chromosome biorientation via multiple activities at the kinetochore
Source: eLife journal article supplement (doi:10.7554/elife.40690), 2018-12-14
Supplement: supp [file elife-40690-supp-v1.zip › elife_poa_e40690_Figure_3_source_data_1.xlsx]

## Sheet: Chr_Span_WT_bub-1
time from nebd (s)	embryo_1	embryo_2	embryo_3	embryo_4	embryo_5	embryo_6	embryo_7	embryo_8	embryo_9	embryo_10	embryo_11	embryo_12	embryo_13	embryo_14	embryo_15	embryo_16	embryo_17	embryo_18	embryo_19	embryo_20	embryo_21	embryo_22	embryo_23	embryo_24	embryo_25	embryo_26	embryo_27	embryo_28	embryo_29	embryo_30
0	8.67115	7.46325	7.6391	5.51432	5.50727	4.03162	4.70299	5.40983		4.66667	3.92842	4.32991	6.04829	7.46325	6.59637
10	6.59637	5.66987	6.97906	4.25278	4.3282	5.00919	4.7015	3.72436		4.01346	4.23654	5.88205	5.23675	6.47692	6.98077
20	5.78013	5.58333	6.04402	4.07457	4.81026	5.72735	5.27265	6.11239		5.73077	3.76709	6.48568	4.98034	5.98312	4.24573
30	6.02094	5.16026	6.66795	4.83056	5.12927	4.23825	3.39573	5.32265		4.20791	5.49081	6.09551	5.73846	6.50855	4.93098
40	6.56239	5.12863	5.9735	5.73803	2.84936	3.65128	3.3859	5.84637		3.7609	5.59167	6.1515	3.6312	6.08355	4.87628
50	5.83611	4.88611	6.17863	4.18846	2.77372	2.78141	2.63526	4.26859		3.73248	4.05769	5.13825	3.3953	6.25	4.49551
60	4.91047	3.67692	4.90577	4.66987	3.38269	3.33846	2.90021	3.50534		3.87607	3.1765	3.86432	4.3532	5.57714	4.05427
70	2.55321	3.32244	3.70748	3.76261	3.08269	3.35449	2.96239	2.91603		3.27949	3.27735	3.53568	4.16111	3.73974	3.36923
80	2.77778	4.08718	2.40385	3.32265	2.49188	3.46603	3.1485	2.59957	4.79808	2.83568	2.63056	3.10021	2.93376	3.49316	2.89701
90	2.30128	3.95021	2.76389	2.9703	2.77051	3.42244	2.38056	2.4515	4.20769	2.63697	3.05791	2.99573	3.48376	3.44039	2.62778
100	2.11774	3.3141	2.40385	2.3468	2.66133	2.83825	2.72714	2.2218	3.10299	2.59957	2.48333	2.29765	3.11474	3.03739	2.39188
110	1.95962	2.37094	2.7782	1.94444	2.31197	3.35961	2.25235	2.00235	2.89231	2.41859	3.06539	2.4062	2.66133	3.0453	2.5562
120	2.0765	2.86496	2.53333	2.19273	2.94637	3.4812	1.81581	1.82329	2.75214	2.16068	2.27265	1.92607	1.98739	2.96709	2.36496
130	1.86966	2.33312	2.01945	2.50385	2.41752	2.88184	1.98034	2.11667	2.37735	2.11667	2.21346	2.19017	1.97073	2.49017	2.46239
140	1.57671	2.94444	2.03974	2.44615	3.32479	2.41004	1.92436	1.99445	2.40278	1.99445	2.34316	2.08397	2.19594	2.91517	2.30128
150	1.89252	2.99573	2.04103	2.12073	4.7265	2.17436	1.83803	2.0641	2.34936	2.64402	2.11325	2.14744	2.47863	3.1765	2.11325
160	1.75919	1.97906	2.35278	2.27137	5.59487	3.32543	2.43098	2.69017	4.09039	4.17137	1.77564	2.13675	3.26154	3.57115	2.22372
170	3.12414	2.13803	2.9703	2.57799	6.74038	4.48483	3.63248	4.5218	5.63227	5.59872	1.9765	2.61816	4.69893	3.2015	2.30128
180	4.40513	2.28034	4.91966	4.12393	7.34701	5.99722	4.95214	6.27286	6.14765	6.4953	2.79872	4.18846	5.91239	5.64039	2.32179
190	5.47885	4.4985	6.24188	6.02393	8.2344	6.91474	6.61325	6.95064	6.84103	6.79167	4.47735	5.82286	6.74209	7.26261	3.01624
200	6.09786	5.55598	7.40962	6.46004	8.10064	7.35577	8.26325	7.92073	7.16688	7.54444	5.78141	6.89445	7.29017	8.1282	4.75556
210	7.04979	6.3359	7.58782	7.43611	8.19038	7.75021	8.40406	8.67372	7.41603	7.79872	6.45363	8.04295	8.07607	8.67244	6.26731
220	7.68611	7.15385	8.45385	7.7782	8.9547	8.00897	8.59957	8.89936	8.09359	8.18974	7.36111	8.88055	8.16752	9.73718	7.74145
230	7.77265	7.54915	8.35556	7.88611	8.89979	8.8344	9.03205	9.35748	8.27714	8.2438	7.59701	8.92244	8.43419	9.36474	8.65278
240	8.24359	7.61944	8.98611	8.36902	9.05043	8.92137	9.43098	10.0568	8.41538	8.72051	8.22799	9.65812	8.79402	10.3551	8.54124
250	8.37585	8.41816	9.57137	8.46944	9.55833	9.16838	9.77265	10.1256	8.33355	9.44359	8.84637	9.82906	8.74915	10.3513	8.85983
260	8.58633	8.72008	9.67714	8.60769	9.97457	10.0891	9.91282	10.4254	9.0594	9.78547	8.68376	10.0408	9.03846	10.9654	9.05449
270	8.55791	8.6968	10.0361	9.04915	10.1643	9.92286	10.2329	10.6002	9.12372	9.77585	9.43633	10.2598	9.72457	11.4981	9.70107
280	9.38034	8.88953	10.4812	9.27756	11.1004	10.1293		10.7489	9.70342	10.1829	9.7641	10.6605	9.89915	11.5387
290	9.20812	9.84573	10.6291	9.33739	10.6521	10.5936		11.4955	10.0633	10.3015	9.92115	10.6316	10.1605	11.9545
300
310
320
330
340
350
360
370
380
390

## Sheet: Chr_Span_WT_bub-1+hcp-1
time from nebd (s)	embryo_1	embryo_2	embryo_3	embryo_4	embryo_5	embryo_6	embryo_7	embryo_8	embryo_9	embryo_10	embryo_11	embryo_12	embryo_13	embryo_14	embryo_15	embryo_16	embryo_17	embryo_18	embryo_19	embryo_20	embryo_21	embryo_22	embryo_23	embryo_24	embryo_25	embryo_26	embryo_27	embryo_28	embryo_29	embryo_30
0	9.33355	5.46026	5.57457	7.64466	7.04808	6.58248	5.99808	6.48803	5.52158	6.58248	5.94081	9.75812	7.36795
10	9.14466	5.13803	5.87949	6.15385	5.45983	6.19872	4.72714	5.49594	5.99145	5.29423	7.31218	8.56154	5.65556
20	7.00321	4.73526	4.70726	6.15021	5.16026	5.49145	4.46218	5.43034	4.57222	5.84038	5.66795	8.61945	4.93974
30	6.39637	5.95449	3.08355	5.95449	4.11004	3.975	4.84808	4.30256	4.82756	6.27628	7.29103	8.19872	4.14402
40	6.20684	6.22927	3.57585	4.8359	5.64979	3.6735	4.48483	4.12179	6.2032	5.24808	5.21474	8.56154	5.23013
50	6.3406	6.69658	3.8688	4.74444	5.59829	5.53419	5.82521	3.82906	6.0344	5.82521	4.64744	8.34423	4.47073
60	6.27628	9.12607	5.15855	4.38184	5.7938	7.66303	6.30534	5.39103	8.89658	6.8094	4.79722	6.89081	5.20385
70	6.49872	10.4496	6.24295	6.77991	5.39103	9.39573	8.20043	5.67115	8.13654	8.95192	5.63846	8.18056	5.75513
80	6.29722	13.3579	8.54338	10.0733	6.49679	12.6107	11.3549	7.44744	10.4799	11.9947	6.93419	10.0536	6.8391
90	10.2128	13.613	9.42372	11.6361	10.0004	14.0036	14.4972	11.1615	12.975	13.7752	11.3494	13.5524	11.7248
100	13.4284	14.6051	12.2656	13.4175	13.4425	16.3419	17.0502	16.756	14.2707	14.2393	12.3592	15.0098	14.4321
110	16.9466	14.2355	13.1961	15.5506	14.8192	17.7647	16.1519	17.8105	16.1094	15.6049	13.7714	17.3865	14.1444
120	19.2073	15.7658	14.9692	17.688	16.8957	18.6607	17.2966	19.585	17.7477	14.6177	18.6914	17.3769	17.4647
130	18.5964	16.084	16.056	19.7325	17.9355	18.0145	18.4506	19.4105	16.6733	16.2844	18.9915	17.3983	17.2654
140	20.5445	16.8293	15.0517	16.9637	17.3075	17.9425	18.2838	20.356	17.5528	15.5477	19.8987	17.406	16.9094
150	21.1504	14.3658	15.0735	18.888	17.4	17.7032	18.5801	20.1103	16.1494	16.2863	20.0641	16.2383	16.5336
160	19.5393	14.5739	15.9209	18.8047	17.3791	16.9842	17.4105	19.835	18.0299	15.2675		17.5682	16.7378
170	16.9457	14.6222	14.291	19.8389	15.7408	16.1254	17.0801	19.1186	17.3363	15.5359		19.4624	17.7214
180	17.0233	15.1175	14.8158	18.1763	16.8241	15.9098		17.7889	16.5994	12.5162		17.6389	16.6201
190	16.4568	14.8483	16.2773	17.7583	15.8846	15.6498	18.2496	17.7487	16.9564	13.9951		17.35	17.2308
200	17.5724	14.6402	16.46	16.7402	16.0534	16.816	16.8432	16.7385	14.3551	12.7987		16.2184	16.0838
210	16.6564	12.759	14.5011	18.1019	16.9444	15.54	17.2013	17.3562	17.8515	13.9853		17.2647	16.3812
220	18.2904	12.9485	14.4137	17.1842	15.8186	16.1365	16.7566	17.112	16.3763	12.1551		16.4974	16.1192
230	18.0051	13.734	15.4827	17.2977	15.9773	15.1712	16.19	17.2261	15.7994	13.1598		16.3925	15.8628
240	16.6765		15.1269	16.1545	16.187	14.7831	14.8983	17.5697	15.7079	12.8731		15.6028	15.312
250	14.2515		14.9887	16.2395	14.9859	16.4782	16.2021	16.2049	16.7064	13.809		14.056	14.9718
260	13.8545		14.8383	15.4932	14.1053	16.0769	15.9113	16.8611	16.0889	13.9968		14.356	15.2735
270	14.6075		14.8551	15.5329	14.6066	16.512	16.1494	16.7615	17.0773			14.1825	15.8838
280	15.3981		15.1472	16.1624	14.1767	16.4075	16.713	17.1414	16.2214			15.8449	15.413
290	15.3799		15.9421	17.1367		16.6002	17.04		16.7959			15.606	15.1603
300
310
320
330
340
350
360
370
380
390

## Sheet: Chr_Span_DKD_bub-1+hcp-1
time from nebd (s)	embryo_1	embryo_2	embryo_3	embryo_4	embryo_5	embryo_6	embryo_7	embryo_8	embryo_9	embryo_10	embryo_11	embryo_12	embryo_13	embryo_14	embryo_15	embryo_16	embryo_17	embryo_18	embryo_19	embryo_20	embryo_21	embryo_22	embryo_23	embryo_24	embryo_25	embryo_26	embryo_27	embryo_28	embryo_29	embryo_30
0	6.20235	6.62735	8.26645	5.7015	4.83141		6.67885	3.72073
10	6.80962	7.00363	6.53184	3.78376	6.14231		5.97949	4.71432
20	6.62585	4.7312	8.58547	3.33162	4.58697		6.27308	5.57201
30	6.16517	5.23739	3.6265	4.36902	5.30171	5.46026	6.31047	4.06538
40	3.90278	4.43504	4.79444	4.51539	5.51068	4.70299	5.09744	3.63868
50	5.64658	5.23526	4.6391	4.16047	5.62628	5.70598	4.24615	5.06944
60	3.96453	5.39957	5.51004	4.47735	7.55406	5.02286	5.30385	7.93803
70	4.34038	7.6391	6.46346	5.15299	9.05449	7.41047	6.7859	6.35342
80	4.7203	7.00107	6.90043	3.64081	8.03077	7.65791	5.54103	5.56282
90	5.62949	6.63761	6.02051	3.4968	9.22158	4.79744	6.1188	4.23184
100	9.9032	6.0703	5.49701	3.26389	10.163	5.20534	5.00107	5.06496
110	8.92244	6.0703	4.42692	2.8891	11.7861	6.21667	5.64893	3.41945
120	8.38697	6.56966	4.98226	2.32179	12.2421	4.68248	5.33803	3.48996
130	9.82927	5.4062	4.80556	2.37286	14.3526	4.4985	6.12585	4.01154
140	9.23291	5.11752	3.37714	2.25385	12.9733	3.90171	4.3656	3.79915
150	6.47778	6.025	3.89914	2.00791	12.9639	3.85214	6.03697	2.87115
160	6.83782	3.46026	2.67137	2.32179	13.7158	3.61068	3.50748	3.24829
170	6.90107	4.24979	2.79615	2.34316	13.119	2.72607	3.13462	3.27714
180	7.15983	4.05427	2.11325	2.30128	11.6481	2.9547	3.12414	4.7656
190	5.67137	2.97329	2.41325	2.13675	12.8427	3.16133	3.16368	7.70064
200	6.31154	3.47222	2.82863	2.61966	10.0515	3.50748	2.74936	9.62585
210	6.59573	3.24979	3.64658	5.95705	10.1987	7.1032	3.22094	11.3346
220	5.77927	4.91047	8.69594	9.20064	11.0126	9.26539	7.16859	11.4122
230	5.55278	8.90427	10.5483	11.0205	11.7545	10.4218	9.28697	11.5169
240	5.55256	11.5545	11.4615	10.7953	12.419	10.9105	10.2692	12.4303
250	8.91367	11.9043	12.7053	11.9147	13.009	11.9827	11.3071	12.5647
260	10.7455	12.3056	12.465	12.3564	14.1231	11.7329	10.9797	12.7564
270	11.1656	13.4026	12.9966	12.2147	14.2925	11.6361	11.6797	12.75
280	11.6194	14.8476	13.4925	11.96	14.6654	11.8006	12.5188	12.7692
290	12.507	14.1115	13.8355	12.7154	15.1936	12.8635	12.6504	13.3222
300	13.312	14.0953	15.1139	12.6083	15.3562	12.903	12.4968	12.9043
310	12.8874	14.1177	16.0457		15.3372	13.1103	13.4586	13.5694
320	13.31	14.0462			15.3201		12.9327
330	13.0622	14.0378
340	13.8355
350	13.8906
360	14.3177
370
380
390

## Sheet: Chr_Span_KR_DN_bub-1+hcp-1
time from nebd (s)	embryo_1	embryo_2	embryo_3	embryo_4	embryo_5	embryo_6	embryo_7	embryo_8	embryo_9	embryo_10	embryo_11	embryo_12	embryo_13	embryo_14	embryo_15	embryo_16	embryo_17	embryo_18	embryo_19	embryo_20	embryo_21	embryo_22	embryo_23	embryo_24	embryo_25	embryo_26	embryo_27	embryo_28	embryo_29	embryo_30
0	6.08098	8.12372	6.64209	7.37756	10.2835		5.55256	6.35748	6.59936	8.75064		3.86068	7.03013
10	3.8547	5.80043	5.54316	7.74038	7.96432		4.5391	5.78205	6.19487	6.81795		5.18974	6.01709
20	4.87265	5.10641	4.82671	6.72115	6.2297		6.0218	4.50748	6.8391	5.6718		4.14936	6.43248
30	4.14872	3.80705	4.21432	5.92586	4.5891	7.03675	4.25342	4.91923	4.35	5.30791		4.07414	4.08932
40	5.71795	4.12179	4.63846	5.77094	4.69359	7.26816	3.24936	4.12393	5.6985	5.34209		3.93355	3.85214
50	5.23825	4.98632	4.5453	5.59744	4.76966	6.1047	5.3515	4.33846	5.62714	4.5968		5.48996	4.5953
60	6.06581	4.56389	4.45278	4.82073	4.27607	5.42457	5.15598	3.97457	6.0609	3.38739		3.98162	6.16709
70	5.25321	3.99423	5.93697	6.27308	4.62863	6.13077	4.59893	5.6906	5.3438	4.6265	5.16816	6.21133	5.23932
80	3.88675	4.61859	6.17265	6.0344	3.51432	6.56688	3.3547	5.98013	5.27073	5.72778	4.39744	6.19658	4.19808
90	5.26923	4.28526	6.21581	6.58098	2.70278	6.30705	4.30684	4.69359	3.29573	6.45726	3.92265	3.98162	3.47991
100	6.51303	3.16133	5.73846	4.03974	2.36496	5.7938	6.88077	4.50876	4.41645	5.82479	6.06047	3.98162	2.83867
110	3.21389	3.20107	5.93397	4.28825	2.41047	3.2141	4.39594	5.25684	4.34701	6.89295	3.30491	3.69338	2.83867
120	4.45769	3.00235	7.12927	3.52393	2.20256	3.67927	2.96838	3.62628	2.93419	7.80513	3.14444	2.71966	2.58184
130	4.01154	3.50748	4.73226	2.72991	2.16325	2.83867	2.77778	2.87479	2.13675	5.71603	3.28333	2.66966	3.11111
140	3.21389	3.57265	2.91816	2.66111	1.81624	3.72714	2.58184	4.8562	1.93483	4.76859	2.67735	2.56902	2.58184
150	3.82906	2.19423	4.4438	2.86047	2.36496	3.45192	2.5485	2.5032	2.06667	4.30043	2.81047	2.47244	2.56859
160	3.65748	2.07051	3.17115	2.50107	1.72607	2.90021	2.10726	2.49423	1.78056	3.17521	2.87115	1.86966	1.9641
170	2.25235	2.15556	2.9062	3.1765	1.58825	2.79316	2.25385	2.19209	2.14145	2.99573	2.59273	2.28034	2.51474
180	2.15556	1.91773	3.20513	2.31902	1.76197	2.45085	2.00726	3.09829	1.5735	3.70598	4.06047	2.05449	2.48504
190	2.32543	2.49701	3.11111	2.96239	2.10449	2.38782	2.12073	4.49231	1.78056	3.52735	9.30214	2.70748	2.53953
200	1.78632	4.61859	2.82051	2.29701	2.16325	2.92799	3.63248	2.10726	1.64444	3.0453	11.4212	7.84295	2.77158
210	2.77778	9.07585	4.30021	2.49701	3.47991	7.96474	7.00898	3.58974	2.21261	3.52564	12.5214	11.035	3.29124
220	4.94744	11.1808	9.51389	2.71218	8.11538	9.98825	9.55577	3.96603	8.08868	3.44615	12.7286	12.594	7.86047
230	8.25299	12.4041	11.894	3.72073	9.94103	11.6263	10.5229	7.02949	11.0519	3.85534	13.5568	13.0496	11.3857
240	9.88697	12.8383	12.6291	8.22543	11.6457	11.9024	11.2383	10.0887	12.3746	7.52906	13.6404	13.5553	12.3684
250	11.4289	13.128	13.5923	10.1914	12.4028	12.7547	11.9017	11.3479	13.2199	10.044	13.5891	13.3508	14.0457
260	11.9464	13.5628	13.3803	11.8603	12.6182	13.6519	12.5214	12.9609	13.7613	10.9872	13.7303	13.4511	14.1062
270	12.5733	13.659	13.4709	12.934	13.1103		13.0814	13.3867	14.2682	11.5564	13.3363	13.2959	14.2258
280	13.0438	14.99	13.8122	14.3705	13.1092		13.4547	14.0754	14.6573	12.1026		13.206	14.5111
290	13.1496	14.3466	13.5814	14.0733	13.3252		12.8902	14.1107	14.4803	12.1256		13.2049	15.0865
300	13.8216	14.8947	14.6776	14.3028	13.5519		13.1062	13.7857	15.1483	12.6141		14.163	15.1577
310	14.3727	14.765	14.3357	14.8904			12.7585	14.4579	14.3874	12.6299		14.153	15.4711
320	15.4818		14.1229	15.2049				14.7675		12.9562
330	15.3748		14.9194	15.1327				15.0231
340
350
360
370
380
390

## Sheet: Chr_Span_DN_bub-1+hcp-1
time from nebd (s)	embryo_1	embryo_2	embryo_3	embryo_4	embryo_5	embryo_6	embryo_7	embryo_8	embryo_9	embryo_10	embryo_11	embryo_12	embryo_13	embryo_14	embryo_15	embryo_16	embryo_17	embryo_18	embryo_19	embryo_20	embryo_21	embryo_22	embryo_23	embryo_24	embryo_25	embryo_26	embryo_27	embryo_28	embryo_29	embryo_30
0	6.57735		6.51838	7.07393	3.97457	5.12927	6.53718			6.75705	8.53098	7.58205	7.70427	6.4032
10	5.58462		6.4391	6.8391	4.37179	5.13312	5.00107			5.6453	7.97778	7.2594	7.05449	5.79103
20	6.6985	6.25534	6.45214	6.2265	4.91282	4.9782	4.48483			6.49872	6.88077	6.77201	5.44979	5.92628
30	6.27436	6.92051	6.67735	6.62094	4.5218	5.26197	4.70791	7.13141		5.34188	6.31346	6.56667	4.06538	4.85961
40	5.61047	6.72393	6.59017	7.20641	4.83996	4.58333	4.64936	5.16175		6.01709	4.20897	4.66624	3.63397	5.02244
50	5.32244	7.16538	6.11966	6.09594	4.51923	3.97906	3.9406	5.3141		6.07756	5.64124	3.52393	4.38547	4.98034
60	4.82756	6.86517	7.19637	4.61645	4.27692	4.58996	4.24081	4.23739		5.23825	3.85214	3.66239	5.23932	4.47308
70	4.07414	4.8656	5.40833	3.70449	4.20491	4.55064	3.92778	4.29744		4.80171	3.73162	4.28526	4.27479	4.95726
80	4.33248	5.23932	6.33526	5.11731	6.03226	4.69103	3.94893	3.73932		4.61261	5.00192	3.18526	6.75192	4.17222
90	3.83291	5.07906	5.00192	5.69658	8.03291	4.76154	4.79124	4.53397		5.83226	5.00192	5.05855	8.37714	6.3906
100	3.30491	4.80171	6.0906	7.15385	10.2771	6.03226	6.08803	6.63761		5.54744	4.58782	4.77799	8.69594	9.04145
110	3.76346	5.10256	7.02735	8.81111	10.0974	7.36795	8.92628	6.49594		5.16816	3.82244	6.42457	9.33419	9.82564
120	3.34444	6.64979	8.3656	10.7889	9.85748	12.4321	8.62286	7.03013		9.9765	5.3547	6.53568	11.5588	10.737
130	5.45278	6.0218	7.19744	7.74615	10.187	12.7006	8.71303	8.70385		13.419	5.83226	7.26346	10.4863	13.0367
140	5.67756	6.13077	9.93996	7.45171	10.5075	14.3727	8.86068	9.81154		14.1235	10.0335	8.47073	13.4684	14.0588
150	5.28846	5.83611	11.0906	8.44722	13.0684	12.741	11.3197	10.3566		15.812	9.36517	13.7853	14.8476	14.8346
160	5.06902	5.81453	10.3417	8.75256	13.9049	12.3188	11.1222	10.7483		15.6902	6.88077	14.4164	15.812	13.2173
170	5.96966	5.69551	11.4573	8.43526	15.1536	16.2175	14.325	12.272		15.2968	7.65962	14.5641	15.9363	11.3816
180	12.0744	4.63846	11.2566	8.76859	13.1987	14.2588	13.3677	15.5624		13.3321	10.8491	13.659	15.2778	12.2449
190	12.9357	3.87137	9.41816	8.63697	13.2534	15.1951	16.29	14.1045		13.9545	12.0438	13.1333	16.3081	11.5868
200	13.8081	4.97115	9.93333	8.67692	13.8442	14.2086	14.6028	12.4763		11.8295	12.5214	13.1154	15.3229	10.1951
210	13.9509	5.13718	9.23098	8.45449	11.9711	14.2254	13.3062	12.9498		10.5763	11.8682	11.7233	14.2291	10.9938
220	14.0188	7.98141	10.6147	8.62415	11.7192	13.5609	12.5376	12.0957		11.6643	11.5818	11.0938	12.5947	10.4077
230	13.9066	8.10833	10.1964	9.1485	12.5011	11.8692	13.2028	11.9147		10.365	11.7133	10.9019	12.0045	11.4496
240	12.012	8.47329	10.2974	9.06538	13.219	11.7224	13.3421	11.9476		11.1049	11.4291	11.9395	11.1203	11.1363
250	11.3633	9.66282	11.065	9.54124	12.816	12.7263	13.4803	11.287		12.8241	11.5186	11.203	10.4838	11.1485
260	11.9158	8.86816	12.0355	9.7203	13.6581	11.9878	14.0256	11.8363		12.1494	11.9543	11.9395	11.2763	10.2056
270	10.6585	9.85043	12.2566	9.97778	13.888	11.9201	13.7109	11.1363		12.8009	12.2709	11.5111	11.2261	11.5588
280	10.6472	8.70641	11.6748	10.553		12.513	14.5594	12.6271		13.0744	11.391	11.8577	10.5617	11.7098
290	11.1667	8.9547	12.6709	10.6314		13.0795	14.4645	11.635		13.385	11.3267	13.0216	10.8164	12.5551
300	12.0598	8.41047	12.8724	10.8491		12.6793	14.9301
310	11.5994	9.39316	13.4479	11.112		12.5883	15.0122
320	11.7874	8.81838				12.7427
330	12.2477	9.22585
340	12.3278	9.98632
350
360
370
380
390

## Sheet: Pole_dist_WT_bub-1
time from nebd (s)	embryo_1	embryo_2	embryo_3	embryo_4	embryo_5	embryo_6	embryo_7	embryo_8	embryo_9	embryo_10	embryo_11	embryo_12	embryo_13	embryo_14	embryo_15	embryo_16	embryo_17	embryo_18	embryo_19	embryo_20	embryo_21	embryo_22	embryo_23	embryo_24	embryo_25	embryo_26	embryo_27	embryo_28	embryo_29	embryo_30
0	13.0981	12.3327	9.88177	11.8132	10.3024	9.63545	10.8801	12.7606		10.9546	12.1536	12.026	11.4106	12.2117	11.4141
10	12.9517	12.4479	10.4753	12.4525	10.2574	9.92885	10.9241	13.2026		11.5408	12.0435	12.4614	11.5531	12.0889	11.4014
20	13.0886	12.7272	10.3902	12.2746	10.3503	10.0875	11.3013	13.1755		11.927	12.6988	12.4113	12.1195	12.2956	11.2396
30	13.2475	12.801	11.0672	11.9861	10.514	10.283	11.5015	12.881		11.6147	13.0714	12.0573	12.1551	12.4869	11.2648
40	13.2393	12.7181	11.2219	12.3064	11.1725	10.5345	12.115	13.117		12.1334	12.914	12.5294	12.1	12.8478	11.6691
50	13.396	12.9123	11.8893	12.323	11.822	11.0359	12.9008	13.0965		12.2132	12.7874	13.1176	12.1955	12.7784	11.9029
60	13.5365	12.8473	12.188	12.6575	12.2855	11.6565	13.3807	12.9748		12.3448	12.936	13.4343	12.939	12.6627	12.1616
70	13.4814	12.8302	12.3537	12.9531	13.2182	11.884	13.9259	13.0343		12.572	13.1239	13.7985	13.3599	13.0444	12.394
80	13.719	13.3558	12.8196	13.5054	13.7309	12.6847	13.9215	13.2792	10.4914	12.7699	13.6075	14.4603	13.0567	12.8074	12.6884
90	13.6974	13.3787	13.0785	13.6868	14.1489	13.5281	14.649	13.7491	11.9463	13.1192	13.7354	14.6784	13.6167	13.135	13.0588
100	13.9287	13.6105	13.6492	13.9408	14.3546	14.0193	14.7962	14.1709	13.1005	13.5082	14.2747	15.1504	13.7859	13.3044	13.715
110	14.3876	13.6194	13.9207	14.433	14.8082	14.6296	15.0622	14.4827	13.7039	13.7966	14.5466	15.307	14.0573	13.8707	13.9792
120	14.336	14.0338	14.2535	14.7481	14.6038	14.6921	15.0591	14.6756	14.5783	14.1615	14.9476	15.3243	14.5281	14.0241	14.5623
130	14.7937	14.5749	14.5298	15.0975	15.0878	14.8768	14.7954	14.6824	15.2036	14.2294	14.8658	15.2122	14.6878	14.233	14.9071
140	14.8666	14.4404	14.9126	14.7521	15.2427	15.1658	14.6496	14.9482	15.6491	14.5574	14.7285	15.0773	14.5471	14.069	14.8875
150	14.6639	14.6411	14.9403	15.1651	15.558	15.5259	14.7523	15.0602		14.5465	15.0107	15.1139	14.7292	14.2763	15.019
160	14.8003	14.4167	15.0211	15.2379	17.0086	16.0025	14.9799	15.503	16.8742	15.7018	15.1948	15.2796	15.3639	13.8488	15.0862
170	15.3114	14.324	15.6587	15.7775	16.8251	16.755	16.13	16.8342	17.6192	16.09	15.2939	15.4619	16.1286	16.0281	15.0365
180	16.1793	14.2856	16.6993	16.5012	17.649	16.8816	16.755	17.7531		17.1795	15.6925	16.6891	16.9789	16.0114	14.9774
190	16.8148	15.5876	17.5581	17.7386	18.4224	18.1918	17.7027	17.9488	18.4453	17.712	16.691	17.2332	17.6276	18.1568	15.3652
200	17.3627	16.3957	18.3753	17.6209	18.3155	18.3572	18.5044	18.9671		18.2118	17.7361	17.9927	18.2185	18.36	16.6695
210	17.9712	17.3857	19.0699	18.5877	18.976	19.0615	19.3198	19.0906	19.5966	18.2231		18.93	18.7675		17.3321
220	18.3031	17.7824	19.3305	19.0025	19.1112	19.023	19.5971	20.3153	20.0877	19.2202	18.8658	19.4867	19.0022	20.3377
230	18.8246	18.094	20.0938	19.4565		19.58	20.0238	20.7248	20.417	19.3086		20.1743	19.2548		18.2485
240	19.3404	18.7247	20.451	19.7524	19.8259	19.9816	20.3534	21.1603	20.816	19.8691	19.8534	20.2372	19.6351	21.3311	19.4487
250	19.6275	19.3196	20.7525	20.1505	20.0097	20.574	20.6147	21.318	20.8807	20.0775	19.9704	21.3479	19.7997	20.9616	19.23
260	19.8713	19.3053	20.7749	20.418	20.2395	20.8859	20.9746	21.8109	20.8345	20.1266	20.6449	21.4067	20.2603	21.459	20.2663
270	20.1343	19.8836	21.0473	20.5429	20.2009	21.1549	21.2314	21.8908	21.1262	20.3355	20.8543	21.6158	20.2823	21.6185	20.4645
280	20.3769	19.9968	21.0593	20.919	20.3581	21.2133	21.4229	21.8783	21.6558	20.5591	21.1525	21.5299	20.5708	21.3398
290	20.48	20.3697	21.4305	20.8225	20.1897	21.4886	21.2875	22.2874	21.6801	21.041	21.3954	21.5881	20.7556	21.5784
300	20.7063		21.5489	21.1646	20.47	21.5659	21.4327	22.4447	21.7145	21.0707	21.3589	21.9119	20.8229	21.3625
310	20.8447		21.5521	21.1537	20.5801	21.6612	21.6345		21.998	21.1282	21.6732	21.8849	21.1053	21.9078
320	21.0934		21.7353	21.2351	20.3385	21.8557	21.9223		22.0308	21.3163		22.1177	21.1846	21.9752
330	21.1441		22.1225	21.5683	20.8254	22.0392	22.4427			21.2865		22.4428	21.3476	22.239
340	21.2991		22.3435		21.2193	22.2429	22.437			21.5149		22.4428	21.4656	22.7317
350	20.937		22.8205		21.2015	22.3316	22.497					22.8709	21.5004	22.9777
360	21.4592				20.9165	22.4504	22.8131					22.7801	20.9231
370					20.9302	22.4682						22.6356	20.8139
380					20.4908	22.2003						22.7788
390					20.3152	21.7942
					20.3364	21.5404
					20.8213	21.707
					20.3494

## Sheet: Pole_dist_WT_bub-1+hcp-1
time from nebd (s)	embryo_1	embryo_2	embryo_3	embryo_4	embryo_5	embryo_6	embryo_7	embryo_8	embryo_9	embryo_10	embryo_11	embryo_12	embryo_13	embryo_14	embryo_15	embryo_16	embryo_17	embryo_18	embryo_19	embryo_20	embryo_21	embryo_22	embryo_23	embryo_24	embryo_25	embryo_26	embryo_27	embryo_28	embryo_29	embryo_30
0	8.05251	9.52833	11.6061	11.639	9.6372	12.3244	9.80045	12.2002	11.1488	12.074	10.773	11.1844	9.76526
10	8.35049	10.0465	12.3575	12.3075	9.7989	12.7079	11.3318	12.1972	11.9328	12.026	10.9447	11.8094	10.2707
20	6.88784	10.6267	12.6717	12.1352	9.9368	13.0961	11.5275	12.2033	12.5903	11.8526	11.3333	12.6189	10.5953
30	7.54999	11.2966	12.8834	12.4021	10.1252	13.0097	11.3861	12.3111	12.6599	12.7605	11.4813	12.6062	11.0766
40	8.21954	11.8141	13.6476	13.1814	10.2782	13.1782	12.1603	12.4613	13.1924	13.3197	11.6405	13.6498	11.793
50	7.39786	12.1758	13.6179	13.5867	10.4911	14.1041	12.9194	13.5737	14.1254	13.6523	11.5022	14.4352	12.565
60	8.64672	13.0145	14.5823	14.1179	12.2174	14.9104	13.7736	14.0709	15.599	14.4385	12.3535	14.7595	13.2409
70	9.32339	15.2253	14.7578	15.0514	11.0196	15.5949	14.6653	14.7495	16.0956	15.3222	13.5301	15.352	13.9824
80	10.2272	17.6421	15.3425	16.8648	11.6277	17.8245	16.8889	15.7439	18.0037	17.2475	13.5138	16.9038	15.1623
90	12.6091	19.0333	16.1569	17.1112	13.6787	19.9055	18.9871	17.197	19.5122	19.0196	15.3624	18.6226	16.9218
100	15.51	20.1863	17.7328	18.7634	17.1155	21.7365	21.1854	20.8396	20.6569	19.2147	17.1507	20.1523	18.9145
110	19.817	20.4695	19.3126	22.0102	19.1861	22.6687		22.3898	21.3982	20.7894	19.1895	21.7155	19.6623
120	22.3194	20.7468	20.2879	22.296	21.4151	22.8783		24.3242	22.4002	20.4119	22.622	22.4733	21.7031
130	22.9538		21.0383	23.9286	22.3639	22.754	24.0513	24.3852	22.6386	21.5945	22.7157	22.3927	21.6832
140	23.8777	21.042	20.6802	22.6626	22.8064	22.5664	23.2301	24.0464	24.0373	21.1083	23.7147	23.0355	21.7972
150	24.3923		21.1765	24.0245	22.9441	23.0555	22.3197	24.4215	22.8348	21.2525	23.19	22.7394	21.8816
160	23.9872	19.7562	21.4486	23.8265	22.5968	22.3393	21.6622	23.8728	22.7463	21.0695		22.1079	21.2288
170		19.8493	20.6855	23.1972	21.6564	22.4374	22.4419	22.9376	22.6635	20.8774		22.2403	21.6996
180	21.5444	20.2882	20.2629	22.8124	21.917	21.7736		22.5954		19.4611		20.9651	21.3498
190	21.5784	19.2407	21.0417		21.1614		22.9357	22.9959	22.6881	20.1056		21.2464	21.2855
200	21.6572	19.5979	20.2942	22.0794	21.9154	21.8678	21.6518		21.0001	19.5765		21.3102	19.9646
210	20.8004	19.4267	20.0327	22.418	21.9237	20.6898	22.2493	22.0162	22.1316	20.2451		21.1844	21.463
220		19.0478	18.7753	21.6769	20.8884	21.4099	22.6108	21.4749	21.3847	19.3794		21.247	20.762
230	20.5856	19.7264	19.9605	21.7355	21.7421	20.5617	22.9863	22.7839	22.1223	19.9663		20.5896	20.8671
240	20.1238		19.4571	21.5779	21.4366	20.8215	22.1619	22.6151	20.967	20.1748		19.9571	20.7366
250	18.0262		20.5404	22.1032	20.7208	21.9142	23.5901	21.6415	21.9942	21.5226		20.1583	20.9533
260	17.3314		21.3706	21.8921	20.3531	22.0327	23.3552		21.3415	21.2703		19.2874	21.1736
270	18.8006		21.5659	22.5556	21.1033	22.0908	23.1714	22.4223	22.9602			20.5717	21.6686
280	19.0984		21.9224	22.6285	20.434	22.0595	23.4394	23.0676	22.4542			21.7734	21.6563
290	19.5996		22.4183	23.1217		22.4438	23.8286		22.7487			22.4328	21.4555
300	21.1437		22.2998	23.2846		22.5336			22.4726			22.7343	21.8896
310	21.1267		22.1947	23.3896			24.1787		23.0881			22.2826
320	21.6607		22.9462	23.4947		23.552			23.3724			22.8459
330	22.303		23.3549	23.284		23.8505			23.5006			22.8463
340	23.0477		23.7989	23.9586		23.8586			22.9997			22.7378
350	23.2102		24.2403	23.5526		24.0397			23.3599			22.7507
360	23.2914		24.3723	23.319		24.6507			23.6293			22.3183
370	23.7073		24.3599	22.6608
380	23.9077			22.7948								22.6916
390

## Sheet: Pole_dist_DKD_bub-1+hcp-1
time from nebd (s)	embryo_1	embryo_2	embryo_3	embryo_4	embryo_5	embryo_6	embryo_7	embryo_8	embryo_9	embryo_10	embryo_11	embryo_12	embryo_13	embryo_14	embryo_15	embryo_16	embryo_17	embryo_18	embryo_19	embryo_20	embryo_21	embryo_22	embryo_23	embryo_24	embryo_25	embryo_26	embryo_27	embryo_28	embryo_29	embryo_30
0		11.5179	11.3453	10.2848	11.1442	7.87719	11.5594	11.3317
10	9.89635	11.803	11.927	10.3644	12.0847	8.46502	11.8327	11.2717
20	10.731	12.2593	13.8253	10.9717	12.9976	8.72315	11.9038	12.0675
30	11.0023	12.7724	14.1284	11.8275	13.69	10.4029	11.7745	12.324
40	11.4648	13.0299	15.3377	12.6053	14.5222	11.7976	12.7041	12.9133
50	12.0326	13.1776	16.4015	13.4425	15.3925	12.4203	13.0888	12.7209
60	13.2002	13.8535	17.1043	13.2359	16.2946	13.5556	14.0737	13.2203
70	14.4749	14.3986	17.0024	13.7995	16.9536	14.41	14.1897	13.8604
80	15.4501	13.9019	17.305	14.1298	17.3243	14.769	13.8874	13.4102
90	16.1647	13.8146	16.3118	13.9948	18.4693	15.6375	14.1868	13.6957
100	16.0428	13.9009	16.1857	13.9451	19.6864	14.855	14.202	13.6716
110	16.0489	14.4734	15.5879	14.0765	21.1094	14.7758	14.5634	13.3648
120	16.4707	14.6486	15.2379	13.8944	21.7155	14.5926	15.1557	13.1682
130	16.0156	14.2703	14.9043	14.128	22.442	14.3121	15.0194	13.18
140	16.0176	14.5585		13.868	22.9042	14.4547	14.8433	12.8688
150	15.229	14.5368	14.7546	13.716	22.393	14.357	14.4168	13.2456
160	15.1455	14.5455	13.6896	13.1637	22.3629	13.9105	14.5129	13.8588
170	15.1181	14.5519	14.6226	13.8808	22.156	14.0115	14.8377	14.4593
180	15.4136	14.8314		14.1853	20.9519	14.3655	14.6379	15.7865
190	14.9811	14.8417	14.5765	14.1792	21.1797	14.8924	14.9186	18.5446
200	14.5882	14.4652	16.009	15.4412	20.3995	15.3764	15.4663	20.3188
210	15.229	15.944	16.8441	18.2486	20.7402	19.3056	16.7043	21.536
220	14.8543	17.5346	21.0956	21.053	20.0143	20.1816	20.1248	21.743
230	15.5073	21.4208	22.5871	21.2049	20.9618	21.3594	20.9315	21.9098
240	16.0085	22.5352	22.9844	21.8559	21.5879	21.3247	21.7041	21.9532
250	18.9524	22.9778		22.2654	22.7073	21.7581	22.5101	21.4568
260	21.226	23.1866	23.6185	22.4759	23.1246	21.6501	22.086	22.1553
270	21.0924	23.3207	24.0938	21.7537	23.3873	20.8058	22.5752	21.7972
280	21.4688	23.3974	24.2199	22.1578	23.7506	21.3538	22.6655	22.1172
290	21.9301	23.4287	23.637	21.9908	24.0888	21.693	22.8878	21.91
300	22.4155	23.4594	24.3097	22.0855	24.2397	21.8115	22.3829	21.7364
310	22.1072	23.2975			24.035	21.8311	22.6458	22.0639
320	22.1082	23.4707			24.0547
330	22.3806	22.9329			24.8141
340	22.0708	22.9454			24.9204
350		22.9289			24.9817
360
370
380
390

## Sheet: Pole_dist_KR_DN_bub-1+hcp-1
time from nebd (s)	embryo_1	embryo_2	embryo_3	embryo_4	embryo_5	embryo_6	embryo_7	embryo_8	embryo_9	embryo_10	embryo_11	embryo_12	embryo_13	embryo_14	embryo_15	embryo_16	embryo_17	embryo_18	embryo_19	embryo_20	embryo_21	embryo_22	embryo_23	embryo_24	embryo_25	embryo_26	embryo_27	embryo_28	embryo_29	embryo_30
0	11.2406	12.1083	12.3394	13.1392	9.24138		11.8417	12.5706	12.4062	9.41544		12.2415	11.8872
10	11.3376	12.1063	12.8034	13.2559	9.33968		11.5748	12.2447	12.8274	9.36506		13.3002	11.4653
20	11.6348	12.727	13.0249	13.5364	10.128		11.683	12.3638	12.6781	9.17115		13.8445	11.7459
30	11.6062	13.076	12.9024	14.2234	10.6491		12.1961	12.3998	13.1495	9.39629		14.8501	11.6002
40	12.1771	13.4901	13.4653	14.3338	11.4745		12.9661	13.181	13.7681	9.55144		15.2594	12.8032
50	12.8832	14.08	13.8135	14.7715	12.1682	10.61	13.3828	14.1587	14.6128	9.80428		14.7938	14.0514
60	13.5279	14.0612	14.6984	14.7965	12.8197	10.9252	13.5866	15.4549	15.3471	10.6884		14.2014	14.4878
70	14.2257	13.9766	15.9092	15.4379	14.0769	12.7565	13.9974	16.2438	14.5541	11.6325		13.7392	14.5344
80	15.2685	13.0392	15.7096	15.8664	13.6953	13.3034	13.787	16.5433	13.5482	11.8093		12.8225	14.1791
90	15.3996	11.8393	15.0873	15.4165	13.145	13.2712	13.1367	16.2656	13.0355	12.3716	12.2052	12.3463	13.6703
100	14.4139	11.7206	14.582	14.7797	13.1308	13.7093	13.0592	16.2824	12.2825	13.7719	13.4181	12.6224	13.4498
110	13.9969	12.3996	14.0456	14.1194	13.1956	13.248	13.6007	15.5317	12.1952	14.5586	13.8238	12.6568	13.1721
120	13.2539	12.5508	13.6502	13.7193	13.7926	13.262	13.4804	15.1401	12.6154	14.8832	14.5661	12.7765	12.7159
130	12.9187	12.6496	13.8686	13.7176	13.4823	13.4161	13.343	14.5114	12.1391		14.7773	12.4226	12.2239
140	13.0283	12.4413	13.4225	13.9028	12.9373	13.1372	13.1882	14.0839	12.3793	15.6843	14.9151	12.7429	12.4108
150	12.8701	12.9862	13.56	13.7102	13.0054	13.3883	13.1608	14.6358	11.9944	15.5558	14.7506	12.6438	12.3578
160	13.0221	12.5361	13.4867	13.6116	13.274	13.2399	13.2933	14.7572	11.6522	15.1663	14.8126	12.8113	12.7034
170	12.9381	12.0798	13.7737	13.7274	13.1097	13.3293	13.3828	14.4892	12.1249	15.4325	14.756	13.0206	12.7901
180	12.8098	13.0366	13.8836	13.8197	13.338	13.3588	13.801	14.7561	12.2668	15.0073	14.7876	13.508	12.6249
190	13.2022	12.9191	13.841	13.9574	13.6157	13.8593	14.0038	14.3902	12.0462	15.0822	15.5201	14.2807	13.3198
200	13.7484	15.7068	14.607	14.2686		14.9253	15.8787		12.3968	14.6899	17.5585	19.0331	13.4931
210	14.8095	19.4017	16.5926	14.4102	15.3579	19.3253	18.0304	14.5191	13.0467	14.7351	21.6988	20.8197	14.5297
220	16.8393	20.854	21.1224	14.9203	19.3817	20.4229	19.7943	16.2172		14.8734	22.7245	21.977	19.1465
230	19.8717	20.6256	22.5459	16.6636	20.5527	21.863	20.6766	18.8542	19.9738	16.6733	23.6425	22.3355	22.5094
240	20.9159	21.9034	23.5098	19.809	21.8094	22.0906	21.0544	21.4508	21.677	19.4402	23.7008	22.3582	22.0706
250	21.9231	21.6285	22.8534	21.3608	21.9234	23.2012	21.655	21.8174	22.1259	20.7185	23.2766	22.13	23.2539
260	22.382	22.0748	23.5847	22.3815	22.5509	23.3484	21.8312	22.2952	22.7982	21.1606	23.5253	21.9995	23.2444
270	23.0217	21.6476	22.8627	23.2376	22.5391	22.8361	21.8922	22.7375	22.9193	21.7674	23.54	21.6993	23.4618
280	23.2003	22.0648	23.3867	23.9453	22.9715	22.4104	21.7507	22.956	22.8201	21.4474	23.243	21.9666	22.7672
290	23.4174	20.9279	22.6194	24.4141	22.756	22.6653	21.6541	22.8247	22.6839	21.2132	22.8731	21.4776	23.0459
300	23.9068	22.0284	23.6442	24.504	23.1048	22.7828	21.7388	22.3879	23.0517	21.2713	23.0009	21.9844	23.349
310	24.1211	21.7896	23.4087	24.3695		22.424	21.477	22.3071	22.3772	21.3725		21.7398	23.6102
320	24.4124	21.7411	23.2208	24.3061		21.7009	21.4103	22.8608	22.6298	21.4328		21.6189	23.3601
330	24.7188	21.5679	23.8396	23.8529			21.3628	22.6886	22.9103	21.8581		21.9193	23.9792
340	24.3722		22.8387	24.0258				23.2161	23.0423	21.8895
350	24.9586		22.319	23.9845						21.98		22.7122
360	24.3115	21.963		23.4079								22.5402
370	25.0746	21.8917		23.1973								22.5396
380
390												23.303

## Sheet: Pole_dist_DN_bub-1+hcp-1
time from nebd (s)	embryo_1	embryo_2	embryo_3	embryo_4	embryo_5	embryo_6	embryo_7	embryo_8	embryo_9	embryo_10	embryo_11	embryo_12	embryo_13	embryo_14	embryo_15	embryo_16	embryo_17	embryo_18	embryo_19	embryo_20	embryo_21	embryo_22	embryo_23	embryo_24	embryo_25	embryo_26	embryo_27	embryo_28	embryo_29	embryo_30
0	9.76305		11.8422	10.2055	10.4901	10.0172	11.7055			11.9788	9.92488	12.3641	10.9576	11.5961
10	10.0514		11.649	11.2242	10.2981	9.91086	11.639	9.8591		11.9543	10.7672	12.7128	11.2446	12.2404
20	10.2612		12.017	11.2687	10.9827	10.07	12.1698	10.0992		11.828	12.2166	12.8924	11.5201	11.8818
30	10.3834		12.0127	11.6837	11.2764	10.1554	12.9263	10.4979		11.6934	11.5641	13.4913	12.2005	11.9248
40	10.1375	11.5401	12.7458	12.0403	12.0125	10.8467	13.0654	10.5879		12.2566	12.4932	13.6281	13.1646	12.3856
50	10.5953		13.3246	12.8115	12.6571	11.0737	13.776	10.8408		13.139	12.964	13.9995	14.1124	13.2758
60	10.8938	12.1164	14.4728	12.989	14.4314	11.9338	14.8641	11.9439		14.5758	14.0808	14.7238	15.3338	14.8251
70	11.6822	12.2276	15.8467	13.1501	15.4756	12.3261	16.3623	12.5221		15.3447	14.1089	15.5132	16.6279	15.261
80	12.9414	13.0095	16.9293	14.4747	16.9168	13.6448	17.9732	14.5716		16.5615	15.7831	17.08	18.699	16.6101
90	14.1459	13.759	17.8879	15.8625	18.9414	15.1574	18.6363	16.9157		17.56	16.6382	19.0604	19.1797	18.9403
100	16.1489	14.577	18.6113	16.797	19.7006	17.2889	19.3731	19.7918		19.0453	17.8129	19.5258	19.6932	19.5644
110	18.1942	15.3978	19.0467	18.2904	20.1536	18.9535	19.6162	21.2081		19.9778	18.9506	20.6568	20.5995	20.4975
120	20.1298	16.1246	19.1726	18.9316	20.0282	19.8956	19.7761	21.6032		21.2607	20.0078	21.0158	21.1316	21.2758
130	21.2285	17.5966	19.8469	19.7115	20.1201	21.8567	20.0116	21.4873		21.8526	20.7308	21.299	20.6334	21.5777
140	21.2022	19.3114	20.1762	19.6165	21.0113	21.9359	19.3774	21.5489		21.5557	21.5063	22.1127	21.1481	21.7445
150	22.1982	20.1267	20.5426	18.9631	21.7798	21.7312	19.7415	20.9955		22.2071	21.102	22.5481	21.5042	22.5827
160	22.6427	21.3007	21.15	18.6283	22.0678	22.0861	21.5473	21.4966		22.5002	21.1179	24.1564	21.802	22.7005
170	22.6249	22.1685	20.8403	19.2783	22.9102		23.4152	22.6506		22.3254	20.4291	23.3933	21.8018	21.7433
180	22.4556	21.6441	21.31	19.9196	22.067	21.5702		23.8226		21.423	21.5661	23	21.0427	21.8451
190	23.0009	21.705	20.6456	20.3673	22.0732	21.3682	23.4762	23.0024			22.4633	21.2278	20.9634	21.4906
200	22.7618	21.5513	20.7447	20.8772	22.0279	21.1423	21.9269	22.137		20.7707	22.6263	22.9481	21.3043	21.3575
210	21.9535	20.1413	20.1801	20.9197	22.0785	21.0019	20.9096	22.723		20.0949	22.8255	21.1032		21.2767
220	21.8412	20.5376	22.1926	21.5879	22.2659	20.9531	21.8238	21.9132		20.765	22.3009	21.367	21.2927	21.032
230	22.6036	20.6775	20.962	21.8695	22.5432	20.8403	22.3162	21.5063		20.1304	21.9587	21.1723	21.0872	21.7885
240	21.414	21.0896	21.7476	21.618	23.1403	20.7482	22.4119	21.7		21.4793	21.9562	22.5763	20.9314	21.5562
250	20.4859	20.6396	22.3892	22.2409	23.0848	20.4608	22.9989	21.4777		22.4372	21.9711	21.9173	20.5125	21.5986
260	21.5321	20.4938	22.9337	22.4439	23.155	21.124	23.0092	21.2903			21.821	22.0355	21.1217	21.2032
270	21.3388		22.0955	22.3445	23.1198	22.0591	22.8845	21.6115		21.1757	21.7943	21.6446	21.5796	21.6694
280	21.5735	20.3556	21.6599	22.4563	22.8013	21.4278	23.0553	22.1851		21.5871	22.3304	21.9074	20.6956	21.9936
290	21.6941	19.8266	22.0409	22.605	23.0793	21.5411	23.071	21.8484		21.3843	22.7734	22.5579	20.7109	22.3637
300	22.4781	20.2898	22.1582	22.6921	23.036	21.6212	22.8192	21.6578		21.2789	22.4166	22.3175	20.4631
310	22.418	21.1114	22.6549	22.2671		21.3083	22.7621	22.3499		21.4023	22.362	23.142	21.0063
320	22.7319	20.8799	22.5563	22.6275		21.2615	22.6107	22.3977		21.6835	22.8155	23.0703
330	23.0343	21.6025	22.9515	23.1475		21.6474	23.0803	22.5408		21.4566	22.9623	23.3217
340	23.2952	21.6264	22.8829	23.4403		21.6881	22.5773	22.8499		21.4084
350		21.5791	23.0251	23.551		22.0175	23.1112	22.8575		21.4074		23.1538
360		21.6303	23.0656	23.4344								23.0564
370			22.7179	23.0249								23.4573
380			22.8096	24.0195								24.3803
390
