# Supplementary material for: BUB-1 promotes amphitelic chromosome biorientation via multiple activities at the kinetochore
Source: eLife journal article supplement (doi:10.7554/elife.40690), 2018-12-14
Supplement: supp [file elife-40690-supp-v1.zip › elife_poa_e40690_Figure_3_source_data_2.xlsx]

## Sheet: Chromosome segregation
	amphitelic	merotelic	mono-oriented
WT_bub-1	15	0	0
WT_bub-1+hcp-1	0	0	13
Delta_KD_bub-1+hcp-1	2	6	1
K718R_D847N_bub-1+hcp-1	4	9	0
D814N_bub-1+hcp-1	0	0	14
