# Supplementary material for: BUB-1 promotes amphitelic chromosome biorientation via multiple activities at the kinetochore
Source: eLife journal article supplement (doi:10.7554/elife.40690), 2018-12-14
Supplement: supp [file elife-40690-supp-v1.zip › elife_poa_e40690_Figure_4_figure_supplement_1_source_data_1.xlsx]

## Sheet: COntrol
time from nebd (s)	embryo_1	embryo_2	embryo_3	embryo_4	embryo_5	embryo_6	embryo_7	embryo_8	embryo_9	embryo_10	embryo_11	embryo_12	embryo_13	embryo_14	embryo_15
0	466.963	246.707	344.841	244.689	490.45	251.252	286.756	185.516	498.043	418.175	523.286
10	457.995	256.874	412.949	223.53	535.547	333.799	311.694	201.454	461.748	380.867	526.427
20	387.429	358.836	505.315	299.378	490.361	344.427	327.056	238.917	403.289	418.746	513.222
30	461.953	414.129	481.851	313.936	614.472	419.605	363.519	269.759	417.478	434.122	656.091
40	435.034	392.042	520.034	391.641	487.991	463.802	382.082	235.368	387.665	474.421	636.144
50	529.172	395.369	504.314	392.011	506.902	535.208	369.839	215.005	362.152	497.072	734.808
60	515.279	353.096	471.176	442.486	453.472	473.355	399.714	263.192	450.194	563.07	772.829
70	528.313	351.934	463.106	380.28	461.257	437.457	358.433	270.192	454.461	491.365	642.823
80	490.836	371.128	383.695	379.755	392.223	385.292	360.828	252.867	443.252	457.447	635.398
90	477.36	332.62	317.878	307.367	345.269	325.753	330.596	230.129	403.98	407.49	590.366
100	425.57	289.358	284.456	258.586	310.273	322.307	338.699	210.674	335.616	375.502	574.412
110	427.464	253.833	259.762	277.271	271.351	304.438	327.87	199.518	325.292	327.23	497.438
120	385.23	252.239	242.376	234.922	229.981	274.112	302.652	136.926	314.018	269.381	441.337
130	336.688	197.108	260.037	241.198	216.466	233.12	295.328	166.675	275.082	255.304	494.728
140	331.175	166.748	225.379	178.29	153.345	207.293	234.948	98.3956	250.969	179.597	383.233
150	285.676	145.355	186.538	171.048	104.436	88.0944	174.385	76.5296	215.726	138.812	272.757
160	231.813	143.083	163.947	102.101	48.9721	86.7559	139.697	32.943	180.308	87.0113	265.956
170	220.641	96.109	142.779	75.0506	31.1983	33.7317	88.4524	25.9771	148.664	50.5586	197.422
180	173.128	71.2373	123.747	80.3989	22.8553	26.1472	27.192	13.1695	85.6187	31.3219	106.067
190	162.281	45.2415	104.678	48.9277	19.0067	11.0975	13.764	12.2215	57.8025	13.1376	78.0786
200	143.396	25.7298	73.78	48.4237	14.7453	9.21949	5.66741	5.86964	23.5169	10.2556	59.3156
210	99.8615	18.39	45.2464	36.1022	11.8529	1.31305	-4.20102	7.8973	14.0906	-1.75504	40.3601
220	71.4806	14.8197	29.3517	32.2433	14.1382	0.0418487	-4.68508	2.72993	5.45019	2.25858	33.7666
230	59.0824	6.92066	25.18	31.2175	6.76042	3.48476	-9.95735	6.50469	-5.8882	-5.02113	23.9201
240	40.2074	7.28406	15.8027	25.2828	0.948406	-3.39764	-15.7208	5.52143	-3.50659	-3.79206	22.5717
250	34.7105	6.76986	8.48766	22.9508	-2.44022	-0.400524	-20.3558	4.60232	-7.60319	-1.92591	19.1594
260	29.0059	4.12134	8.54838	26.0165	-1.09476	-3.86181	-23.1105	4.3863	-8.39757	-5.46251	21.8288
270	12.5558	3.88625	-0.0718116	22.6024	3.29876	-0.854119	-27.3227	3.87325	-10.4377	-1.1183	24.1476
280	14.1284	0.841689	2.93941	19.9707	3.05337	-1.12002	-23.4508	5.4647	-15.4975	3.17329	24.1797
290	16.5595	1.49144	2.52923	16.0614	4.10061	-2.50646	-24.8324	4.86219	-19.1146	3.44897	26.7359
300	11.1019	2.21702	0.267973	20.7678	-0.14916	-2.83525	-22.7001	4.92866	-18.0727	7.45639	29.8709
310	12.3134	2.25763	1.13038	15.114	-2.78266	-1.41419	-24.5425	1.07366	-20.3774	8.30566	30.89
320	8.91509	-0.280353	-1.372	19.2977		0.717839	-26.1495	0	-22.9371	15.3596	33.0101
330	8.35346	-1.99228	-2.98553	22.1716		3.59165	-26.4756	0	-21.9688	16.8122	39.3692
340	6.81248	1.15982	-3.68326	19.3445		1.10554	-21.5805	0	-17.4568	24.0913	36.5127
350	4.16859	5.23291	-0.45741	24.6812		2.66198	-20.394	0	-17.9722	19.6494	29.1326
360	6.48414	5.15382	2.70573	25.9249		1.01736		0	-21.3872	25.0504	33.6553
370	10.2741	3.72561	4.67364	18.973		0.176132		0	-13.5221	25.396	38.6927
380	12.4013	2.25867	7.3967	12.5691		0		0	-13.7067	24.8132	36.695
390	7.34978	3.08725	7.68552	16.3906		0.193822		0	-11.0244	20.3917	45.054
400		1.07651				0		0	-4.1119	22.1532	47.7828
410		0.0547624				0		0	5.70962	17.336	40.8822
420		0						0	5.34109	15.3835	55.0755
430		0						0	10.0881	17.4144	62.1958
440		0						0	13.3507	9.16205	51.2359
450
460
470

## Sheet: bub-1
time from nebd (s)	embryo_1	embryo_2	embryo_3	embryo_4	embryo_5	embryo_6	embryo_7	embryo_8	embryo_9	embryo_10	embryo_11	embryo_12	embryo_13	embryo_14	embryo_15
0	98.4762	151.892	73.6235	210.321	83.3758	323.735	49.9841	151.663	135.882
10	204.14	137.805	76.9648	270.205	100.659	334.406	53.1383	123.973	176.415
20	108.807	150.636	91.459	250.334	138.554	349.954	58.9547	117.678	186.492
30	128.181	174.461	153.427	315.606	192.588	339.843	111.262	183.582	212.532
40	141.971	183.479	139.494	349.391	242.051	323.408	140.627	177.914	272.757
50	232.543	194.296	219.058	350.88	234.623	363.076	174.684	246.255	278.754
60	274.489	221.099	275.87	331.042	229.241	407.404	195.863	266.994	303.087
70	297.729	269.109	253	291.009	190.532	402.966	217.952	257.986	303.882
80	277.203	242.674	235.832	252.317	164.237	334.091	180.679	229.344	264.021
90	232.99	219.902	241.677	194.374	161.417	272.269	159.931	212.244	204.45
100	255.728	152.039	230.85	142.844	135.845	245.697	215.792	175.204	188.323
110	203.643	129.955	213.111	123.768	108.966	209.513	178.384	162.605	182.821
120	186.003	108.222	163.803	132.509	84.846	187.684	147.933	162.221	143.751
130	161.181	105.212	135.932	127.029	84.9341	167.982	146.063	129.566	161.394
140	128.833	87.6897	124.598	118.393	89.523	136.723	142.845	116.406	153.802
150	135.526	92.3743	101.859	103.615	99.2003	106.539	115.507	105.232	105.426
160	121.181	79.7687	105.902	92.2672	72.7772	94.9009	127.739	86.9234	121.273
170	151.108	76.8997	93.6821	76.2148	68.4864	102.877	122.291	82.5983	103.064
180	106.038	63.9685	78.1697	110.978	71.3957	93.6874	106.868	72.3503	82.4479
190	140.103	54.1061	73.3528	68.5756	71.6391	91.1365	99.5828	56.7159	101.9
200	94.185	34.7173	62.5574	77.3337	57.5524	82.6699	91.433	56.5901	64.1093
210	75.1784	20.6495	56.0126	45.9512	54.538	74.8101	87.4464	33.7775	71.5703
220	59.553	-0.0651561	37.9211	53.1281	21.9303	46.5282	66.9909	37.6621	30.6302
230	37.9361	3.85407	20.3049	18.9765	19.4849	40.0982	61.4953	14.0712	25.6361
240	11.211	-20.4925	4.52057	15.4857	2.86797	33.4043	51.9431	8.50656	9.38884
250	10.1768	-19.2473	-2.91621	2.57586	1.00007	31.8748	40.3659	-2.44081	2.24052
260	7.14939	-22.925	-3.27433	0.28808	-2.11171	28.8161	10.3721	-5.86314	1.5892
270	8.10676	-23.7045	-7.86481	2.03499	-3.16648	16.064	0.63576	-3.63479	1.19805
280	2.67556	-22.1343	-2.77755	-2.67001	-6.7356	17.1005	-3.34671	-7.58352	1.00229
290	4.55659	-21.7286	-9.88809	-1.62203	-8.47406	15.4759	-4.9084	-6.325	5.83487
300	3.83984	-25.6927	-5.50647	-5.08792	-9.64198	12.3392	-9.24029	-6.71697	0.0574599
310	4.49549	-21.6418	-4.94233	-2.37507	-7.31225	13.8698	-9.51895	-5.58604	-2.19088
320	2.92453	-18.8439	-3.77059	-5.51316	-7.05484	14.0417	-11.5236	-7.60357	-1.17675
330	5.2033	-20.601	-8.04635	-3.24376	-12.2956	11.4346	-11.0222	-5.59083	1.2792
340	2.75978	-17.6157	-9.0294	-3.76189	-10.9581	12.8922	-9.63651	-6.71797	0.530029
350	2.98514	-18.8785	-9.36887	-3.2691	-11.3501	9.24086	-14.299	-7.21401	0.227017
360	1.00901	-15.5307	-12.9778	-0.272917	-10.345	8.38231	-9.68981	-6.26273	1.97629
370	2.35622	-16.5643	-11.6562	1.69489	-7.78793	9.39962	-5.92407		3.79741
380	-13.711	-10.2733	-8.04123		-5.71943	8.49875	-5.2112		3.65901
390	-80.3551	-10.5424	-5.58037		-4.50964		-6.73062		3.77602
400	-84.3558		-1.83309		-4.34515		-5.44574		1.07849
410	9.16063		-0.771818		-3.91105		-3.81569		1.18427
420	4.71232				-0.328116		-2.09009		0.979773
430	0				-0.142607		-0.577819		0.52649
440
450
460
470

## Sheet: hcp-12
time from nebd (s)	embryo_1	embryo_2	embryo_3	embryo_4	embryo_5	embryo_6	embryo_7	embryo_8	embryo_9	embryo_10	embryo_11	embryo_12	embryo_13	embryo_14	embryo_15
0	351.907	458.605	480.823	335.451	329.865	397.729	544.839	36.7197	341.571
10	352.56	618.233	549.739	344.323	383.284	413.773	498.707	52.4476	377.847
20	346.071	654.504	498.384	372.137	359.243	487.958	429.2	72.7211	511.854
30	341.786	704.732	536.614	280.587	345.934	573.59	414.505	102.091	494.097
40	369.4	764.384	529.15	277.476	443.328	547.327	481.337	112.749	447.699
50	426.883	770.428	523.36	328.235	492.762	524.848	552.167	148.431	445.5
60	474.43	674.712	565.781	399.158	657.212	502.236	543.298	259.764	480.088
70	467.266	616.795	603.539	457.673	664.042	499.488	597.189	304.785	489.687
80	516.12	622.905	609.836	520.17	693.825	538.13	696.064	472.447	507.838
90	493.986	593.561	573.754	551.528	645.352	574.359	643.923	508.538	514.136
100	497.39	618.997	516.883	461.645	521.486	506.584	690.31	464.445	486.25
110	481.788	632.7	481.317	469.593	516.476	517.551	681.059	420.631	601.502
120	447.98	649.275	474.666	457.826	429.661	498.306	693.96	423.245	645.182
130	442.368	695.07	507.796	458.611	500.374	465.833	670.001	388.482	607.524
140	486.378	664.859	496.224	460.211	436.134	406.091	728.063	404.577	723.244
150	487.082	609.02	483.066	460.702	494.757	414.547	618.352	363.331	625.862
160	437.043	547.562	660.764	477.257	437.579	499.147	565.332	348.127	507.25
170	419.917	536.187	680.706	455.593	449.776	450.521	587.872	367.498	642.021
180	416.849	530.647	607.232	522.357	454.603	459.2	611.43	295.641	393.543
190	427.347	531.391	479.318	500.649	520.363	384.459	583.156	370.721	447.381
200	368.603	428.201	513.927	466.831	499.509	383.904	599.968	356.374	328.256
210	413.61	394.629	527.955	499.788	413.665	358.658	602.158	313.883	377.269
220	328.988	339.863	418.154	494.876	414.051	315.807	592.544	348.709	305.29
230	255.013	242.9	404.368	424.017	403.368	285.103	540.737	353.901	255.55
240	215.818	183.552	384.363	401.969	334.408	217.59	485.144	349.813	213.749
250	204.321	145.134	383.756	332.956	378.074	202.257	397.457	356.762	167.542
260	296.373	115.045	329.942	291.196	455.309	164.215	369.412	431.483	144.188
270	186.885	74.3358	315.358	244.915	349.771	118.592	281.607	286.911	103.068
280	49.1846	42.521	274.793	208.16	393.132	76.0574	236.491	228.481	87.9942
290	126.779	40.4506	244.994	151.145	242.44	70.1382	194.413	206.616	67.9958
300	83.6907	31.2893	204.591	142.035	291.753	33.5434	150.766	104.537	51.1851
310	71.3417	26.7663	170.065	108.014	235.032	11.6357	128.002	87.9152	47.1282
320	51.9248	29.3494	146.66	98.5521	193.872	2.35016	105.654	60.9461	25.4583
330	29.7868	20.9722	106.648	92.8904	133.829	-6.44351	98.5285	45.3834	28.1755
340	21.0848	18.8144	66.5559	53.1879	105.994	-18.3346	94.1727	31.0695	20.2863
350	14.3057	17.6285	38.5729	37.1267	79.7549	-19.8632	82.905	21.2546	21.7524
360	8.70773	18.4449	34.5644	42.1461	74.933	-22.2223	83.9335	12.8501	17.1847
370	7.88042	20.1109	23.8517	35.2694	60.309	-25.1251	77.4631	11.1637
380	6.11753	17.7879		25.4778	36.0143	-30.741	81.3371	6.48213
390	4.68601	18.2516		27.3142	30.8022	-24.1052		2.73194
400	0.731322	17.7377		27.166	10.7122	-22.903		4.10765
410	-1.99176	11.539		23.9596	-3.03857	-23.1375		0.456114
420	-0.7241	12.4016		23.7789	-1.04375	-23.1658		1.10983
430	0.458324	16.2194		23.5329	-10.4932
440
450
460
470
