# Supplementary material for: BUB-1 promotes amphitelic chromosome biorientation via multiple activities at the kinetochore
Source: eLife journal article supplement (doi:10.7554/elife.40690), 2018-12-14
Supplement: supp [file elife-40690-supp-v1.zip › elife_poa_e40690_Figure_4_figure_supplement_1_source_data_2.xlsx]

## Sheet: COntrol
time from nebd (s)	embryo_1	embryo_2	embryo_3	embryo_4	embryo_5	embryo_6	embryo_7	embryo_8	embryo_9	embryo_10	embryo_11	embryo_12	embryo_13	embryo_14	embryo_15
0	-46.405	-44.632		-6.14269
10	-45.1617	-35.5941		-11.8738	-25.0439
20	-17.0924	-23.565	-41.1194	6.49823	-14.4152
30	-1.94815	5.20754	-30.3014	20.0579	-7.6043
40	23.2966	19.7897	-8.89291	48.012	-1.82136
50	37.9801	47.7042	24.6371	42.5846	20.8806
60	60.984	67.5239	71.7074	38.1637	53.8567
70	93.1106	97.7186	92.2354	85.2242	95.2387
80	86.0067	80.0534	137.551	75.7509	106.489
90	109.956	94.3811	141.935	115.789	116.73
100	117.343	122.038	155.145	133.55	134.672
110	91.4011	113.944	147.286	123.202	116.672
120	93.4575	108.385	148.123	113.035	105.617
130	127.636	158.773	117.572	104.157	98.4814
140	77.8168	116.587	101.499	81.8669	113.28
150	61.1515	127.194	95.9744	63.9514	112.972
160	54.7522	81.0172	116.028	44.561	82.3445
170	27.4651	55.9442	97.1927	34.2852	67.8223
180	31.4999	41.7865	73.8577	35.2374	30.377
190	17.955	35.7277	63.0156	28.5632	34.7006
200	6.44745	15.8337	34.3912	22.4756	15.8559
210	4.94054	16.5992	32.149	16.1989	15.0564
220	-0.623845	12.1771	28.0423	22.08	7.41624
230	-1.62129	10.435	14.5709	10.0265	6.11379
240		7.05564	21.5744	12.9367	2.83646
250		3.31727	15.2645	9.89449	-1.43469
260			15.9866	6.35095	-4.3044
270			4.396	10.835	-13.9499
280			3.55492	1.36059
290			-8.58572
300			-12.4488
310			-8.66404
320			-7.27058
330
340
350
360
370
380
390
400
410
420
430
440
450
460
470

## Sheet: bub-1
time from nebd (s)	embryo_1	embryo_2	embryo_3	embryo_4	embryo_5	embryo_6	embryo_7	embryo_8	embryo_9	embryo_10	embryo_11	embryo_12	embryo_13	embryo_14	embryo_15
0	-34.7325	-23.0911	-15.785	-31.3356	-43.0864
10	-24.2339	-29.7758	-9.21243	-20.1919	-33.3872
20	-1.20746	-23.6877	0.0595924	-10.739	-32.499
30	20.5208	-11.0029	6.79897	5.17325	-12.9827
40	35.2807	-13.3218	19.1879	15.4768	2.26659
50	42.3468	13.3471	32.0585	28.0365	16.1427
60	47.1857	29.8002	37.3255	40.1079	24.0741
70	66.9043	38.1581	37.8964	56.1402	40.0097
80	71.7866	51.1619	28.2865	59.3809	50.6355
90	76.6042	44.8065	23.0803	52.429	68.631
100	80.9004	54.1132	19.6936	53.4293	64.5204
110	69.0217	53.7078	9.9329	50.9733	67.4033
120	57.3332	57.1105	8.84995	45.6726	47.0286
130	49.3654	39.9366	7.21635	32.493	37.2359
140	43.9005	22.7604	6.47436	9.41163	28.2004
150	28.2394	36.1257	5.2188	8.75968	25.5144
160	23.7094	21.5785	2.93103	0.0418756	27.962
170	22.733	16.3752	2.07505	-2.78215	12.9731
180	16.929	15.3606	-0.535752	-0.858912	7.92369
190	11.1263	8.27585	-4.41653	-6.93235	9.77421
200	18.5989	4.68104	0.797097	-7.1521	9.10883
210	18.0064	5.18819	0.0892353	-13.4595	10.7562
220	20.1198	6.42553	0.33667	-8.7086	21.229
230	15.2374	5.74743	-1.468	-3.04693	14.3238
240	12.6754	2.36193	-2.38953	-6.34415	14.3625
250	7.36312	4.16236	-3.06704	-1.45101	22.6891
260	-0.909905	8.91055	-4.44648	-4.78173	13.9326
270	9.48402	6.40934	-3.18991	-2.38484	9.98513
280	9.85891	12.5146	-3.8684	-4.22678	4.75734
290	14.1701	7.85968	-5.62662	-5.71981	-0.630169
300	1.35667	8.99863		-6.87938	1.95331
310	3.83248	10.7257		-6.38231	-5.10009
320	1.01534	12.9756		-11.8241	-4.09583
330	-4.1755	12.3409		-10.6152	-7.38228
340	-1.42945				-9.76991
350	-9.60849
360	-10.0728
370
380
390
400
410
420
430
440
450
460
470

## Sheet: hcp-12
time from nebd (s)	embryo_1	embryo_2	embryo_3	embryo_4	embryo_5	embryo_6	embryo_7	embryo_8	embryo_9	embryo_10	embryo_11	embryo_12	embryo_13	embryo_14	embryo_15
0	-45.024	-6.67372	-34.361	-55.1878	-54.7002	-33.4255	-43.4399	-34.4223
10	-29.7346	15.6735	-30.4528	-46.6412	-48.907	-20.5445	-30.0052	-10.8882
20	-18.0714	10.1985	-8.4748	-51.6993	-39.6762	-21.7518	-3.85491	-6.72317
30	-6.94073	12.565	4.29711	-32.0644	-20.5931	-10.6588	1.90187	14.5015
40	6.73205	18.3809	17.4068	-14.0183	1.3966	7.54531	11.1088	22.3763
50	29.2918	37.3821	26.7607	18.6774	26.2599	12.3035	22.883	28.4748
60	51.1201	47.7489	37.2071	41.0328	48.0306	27.3144	39.6513	48.6882
70	96.7103	50.452	53.7144	54.289	48.6416	43.9608	60.7813	71.8992
80	145.49	43.1514	70.5924	80.5281	51.125	74.4453	71.2493	77.0822
90	180.685	70.0553	89.0502	86.7157	66.6822	65.201	68.7125	104.883
100	163.829	86.7554	79.3881	86.7147	71.829	73.0592	74.6853	104.596
110	145.126	84.5751	79.3838	86.2155	73.3208	75.5931	77.6365	113.452
120	150.952	95.9124	83.9198	142.243	64.8794	87.4724	91.3977	105.839
130	151.288	98.3951	129.758	142.914	72.0225	89.9573	97.0412	126.635
140	196.1	117.424	137.08	162.256	91.9007	135.206	115.464	122.565
150	197.123	134.655	126.558	157.369	79.5171	131.793	100.195	122.323
160	205.202	118.159	103.765	127.82	109.144	92.0472	106.236	131.219
170	184.11	116.945	147.486	114.745	69.9034	75.7628	96.7949	123.465
180	274.195	135.477	102.394	159.957	71.9818	84.7062	113.36	109.412
190	249.5	143.936	125.518	179.981	74.0666	81.7351	106.557	124.546
200	210.091	181.417	76.177	166.05	85.0723	74.8801	148.071	115.838
210	183.321	154.422	53.3225	133.91	88.1165	66.7955	121.711	142.904
220	188.476	139.704	34.3258	101.72	89.9289	47.9774	98.6537	144.309
230	164.44	151.271	31.2014	76.9744	65.2669	46.5587	114.237	140.915
240	186.211	118.044	5.42413	52.5905	46.6489	20.6406	86.4221	78.1
250	128.276	93.554	-0.804083	31.4469	56.1205	3.12813	76.58	41.019
260	138.71	131.726	-3.87512	15.4217	42.7834	-1.79338	55.6363	14.3938
270	69.348	116.886	-6.50591	14.3899	32.0457	-9.34797	27.7348	8.92411
280	34.1772	146.374	-3.55039	10.2712	29.0196	-5.51265	23.9246	0.721123
290	17.0581	138.895	-1.95052	9.54207	24.087	-11.9735	17.3662	0.426911
300	2.82877	84.5976	-3.82126	-0.731236	24.6749	-10.1696	14.9308	-6.15773
310	-0.94782	51.9597	1.32485	-0.0377181	15.4486	-16.5193	17.881	-2.17115
320	-1.52249	38.0936		-4.55773	18.4214	-22.5132	7.07794	-5.83437
330	-9.17998	43.5155		-8.04733	10.1547	-16.4108	10.3166	-11
340	-19.221	29.509		4.51204	5.47665	-16.902	4.38819	-8.92488
350	-17.0712	27.0026		-14.4264	0.844629	-19.0955	2.9941	-11.5097
360	-14.6616	21.9368		-12.8483	-1.45805	-18.749		-7.27837
370	-10.408			-18.7645	-0.114706			-10.3983
380				-22.3309	-3.93472			-13.7182
390					-5.38832			-10.1798
400					-3.06302
410					-0.339934
420					0
430					0
440					0
450					0
460
470
