# Supplementary material for: BUB-1 promotes amphitelic chromosome biorientation via multiple activities at the kinetochore
Source: eLife journal article supplement (doi:10.7554/elife.40690), 2018-12-14
Supplement: supp [file elife-40690-supp-v1.zip › elife_poa_e40690_Figure_4_figure_supplement_1_source_data_3.xlsx]

## Sheet: Sheet1
WT	Delta KD
0.548323	0.601175
0.557393	0.463037
0.892151	0.421885
0.514914	0.867384
0.510359	0.446914
0.414908	0.58168
