# Supplementary material for: BUB-1 promotes amphitelic chromosome biorientation via multiple activities at the kinetochore
Source: eLife journal article supplement (doi:10.7554/elife.40690), 2018-12-14
Supplement: supp [file elife-40690-supp-v1.zip › elife_poa_e40690_Figure_4_source_data_1.xlsx]

## Sheet: Feuil1
OD1870	OD1870_BUB1	OD1870_HCP12		JDU538	JDU538_BUB1	JDU538_HCP1
124.337	78.2043	147.84		133.087	57.6054	116.655
86.0539	46.7696	177.166		83.5543	38.5315	61.7745
85.68	68.0358	154.329		86.8975	64.2465	56.5286
72.2237	41.8077	129.696		105.472	14.0229	61.7455
91.8301	39.5862	148.604		95.0951	38.0445	51.1461
91.8538	72.5301	150.72		95.8939	45.942	52.022
97.8059	67.4131	194.256				53.1799
63.23	49.7189	154.003				74.4781
104.623	57.8996	154.477
114.905
167.457
