# Supplementary material for: BUB-1 promotes amphitelic chromosome biorientation via multiple activities at the kinetochore
Source: eLife journal article supplement (doi:10.7554/elife.40690), 2018-12-14
Supplement: supp [file elife-40690-supp-v1.zip › elife_poa_e40690_Figure_4_source_data_2.xlsx]

## Sheet: Chr_Span_JDU440_hcp-1
time from nebd (s)	embryo_1	embryo_2	embryo_3	embryo_4	embryo_5	embryo_6	embryo_7	embryo_8	embryo_9	embryo_10	embryo_11	embryo_12	embryo_13	embryo_14	embryo_15	embryo_16	embryo_17	embryo_18	embryo_19	embryo_20
0	5.60043	6.45363	6.63761	7.38227	6.93846		5.68953	5.65556		6.34231	5.19209	6.53718	5.85662
10	5.75342	5.08932	5.03526	5.98312	6.96154		5.75769	6.28162		6.10791	5.04081	4.41474	5.40983
20	5.56389	4.65235	4.61068	5.78205	6.88227		4.36068	7.02393		5.78846	4.30021	5.2	4.12821
30	4.3953	4.63056	4.41282	5.58547	6.22265		4.06303	5.80427		5.34701	3.4203	4.37329	5.63825
40	4.80086	6.11517	3.92906	6.53034	4.38184		3.69017	9.44402	4.52778	6.3406	5.09701	4.75299	6.93782	8.69594
50	5.44359	7.90598	4.01539	5.88205	7.06133	7.28462	4.26859	6.43547	5.51539	7.39231	6.24338	6.06047	7.63355	7.83633
60	7.99509	7.14551	5.52799	6.24808	8.09359	9.94103	5.67842	10.5573	7.1485	6.02051	10.3925	7.16859	8.16453	6.58761
70	10.228	8.80171	7.73397	6.1953	9.01496	12.1492	9.04423	12.4254	11.3972	10.1333	10.9549	9.08697	11.243	7.59231
80	12.3919	15.4491	11.9365	10.6218	11.6175	15.6094	9.62265	14.4013	13.0342	12.1462	12.4521	11.2853	14.1353	10.4707
90	14.8476	18.1291	15.9977	12.9487	15.4573	17.8004	10.5776	15.5002	14.3417	15.3472	13.1085	11.8921	15.7489	12.7006
100	16.0592	20.0481	19.1908	15.303	17.315	18.2974	12.0002	17.7812	15.2793	17.0353	13.6718	12.5261	16.453	14.6254
110	17.0372	21.1068	18.8265	18.197	18.7485	19.7532	15.9098	17.9115	17.3919	17.5511	14.0524	14.135	14.2098	16.1833
120	17.8278	20.0773	19.1404	19.3267	19.9481	20.5942	16.5169	19.0171	16.9876	19.3254	16.2799	16.4389	15.3846	16.7312
130	16.2831	20.8367	19.7284	19.1088	19.1532	19.6338	18.1624	18.7613	17.2019	17.0194	17.2906	17.6878	16.1833	19.0453
140	16.8256	21.8402	18.2197	18.2846	18.838	18.8588	19.243	18.5453	16.2449	17.8577	17.0096	18.5406	17.5218	19.4624
150	19.266	20.3024	18.6769	20.3092	21.453	17.5573	19.6795	17.1156	17.8278	17.6359	17.8011	17.1425	17.4472	18.716
160	18.0419	20.2034	19.0833	19.4021	19.6483	15.1718	17.6684	17.6791	17.5374	17.4162	16.1165	17.1695	16.6859	17.4776
170	19.322	21.2333	20.1729	19.1848	19.166	14.9047	18.5154	17.8098	17.6385		17.2229	16.5152	17.1594	15.7021
180	16.8205	19.3816	18.2573	20.2207	19.5325	15.6673	17.2053	16.6912	17.0036		16.1893	17.4662	17.64	15.3938
190	18.7793	19.3752	19.7951	17.7355	19.3316	13.7835	17.0547	17.1047	16.7739		16.1141	15.7639	16.7111	15.1432
200	19.3669	19.0432	19.2415	18.0686	17.6265	13.7353	16.7684	15.5382	16.1677		16.5697	14.3479	15.835	15.4083
210	18.3615	16.9299	19.6887	18.1991	19.6665	16.0823	15.716	17.9964	16.4543		17.2006	13.5912	15.2669	16.2229
220	18.1784	16.7902	19.3799	19.9254	17.7684	16.1432	18.0224		16.618		16.4043	13.0917	16.1406	14.8423
230	19.0378	19.5729	19.0801	16.5085	17.1748	15.7258	17.1662		14.9669		16.2474	15.3267	15.9041	17.0626
240	18.5462	15.81	15.7368	15.8397	16.9827	15.0303	16.6325	15.6987	13.5788		15.613	15.0122	15.7867
250		17.2058	15.38		16.2519	17.5654	15.6917	16.3694			13.8675	15.7135	15.6115
260		17.26	14.6861		17.0994		16.9291	13.4479	18.9015		16.4752	16.0256	12.6085
270		15.3906	16.2239		15.4571	17.9538		14.7049	16.3024		15.7265	17.0686	13.419
280		15.8436	16.5857		16.565	16.8816		14.109	16.1165		16.3694	17.2667	15.0303
290		16.4323			16.6885	14.7498			19.1511		16.1547		15.5998
300		15.9671			17.7363	16.0953		16.7227	18.3959		16.5857		13.9152
310		18.5737			16.8628	15.8077		14.297	16.8479		17.3197		14.4748
320		19.7427			18.4207	16.0314		14.4323	12.187		16.8261		14.1607
330		16.7622			16.8857	17.4128		14.965					14.7991
340					15.4793								13.8756
350													14.5079
360
370
380
390
400
410
420
430
440
450
460
470
480
490
500
510
520
530
540
550
560
570
580
590
600
610
620
630
640
650
660
670
680
690

## Sheet: Chr_Span_JDU440_hcp-1+bub-1
time from nebd (s)	embryo_1	embryo_2	embryo_3	embryo_4	embryo_5	embryo_6	embryo_7	embryo_8	embryo_9	embryo_10	embryo_11	embryo_12	embryo_13	embryo_14	embryo_15	embryo_16	embryo_17	embryo_18	embryo_19	embryo_20
0	7.83932	7.18269	6.65192	6.69252	7.56432	5.57201	8.02927	8.31261	6.63761	6.56667
10	7.07393	5.33376	7.30855	6.82009	5.91004	5.44765	6.46731	5.99509	4.68184	5.68098
20	7.03013	4.40513	6.18462	6.27436	4.53526	5.9735	4.26218	7.08718	4.68675	5.98675	6.21133
30	6.29252	5.50833	5.91175	5.63227	5.36859	5.61367	4.19209	5.42051	4.33248	5.41303	5.7688
40	5.13761	4.18291	5.075	4.80556	4.79124	5.6703	3.85214	4.35406	2.50513	4.64936	4.80235
50	5.43974	4.8453	4.7656	4.46047	4.8391	5.47372	3.71474	4.77265	2.97607	5.1188	4.06047
60	4.69359	4.53675	3.96432	5.14508	5.74936	5.91218	2.79231	3.84615	3.56987	7.12885	4.06047
70	5.04295	3.60662	4.02158	5.24167	5.5906	6.91474	4.20235	4.01154	4.04722	7.23312	6.28226
80	6.53483	3.41945	4.08162	4.13162	5.45235	7.05406	4.84338	4.93312	5.19551	6.65748	5.52863
90	6.63291	3.0594	5.73034	3.95085	5.39295	6.51581	5.70192	4.5938	4.9	6.33953	5.61773
100	6.20235	3.00492	5.5906	3.98675	6.07094	5.85641	4.8453	4.28825	4.30021	5.8859	5.75513
110	5.14209	4.00449	5.23483	3.79295	5.41367	5.84038	4.06538	4.25085	5.03291	5.51197	5.29936
120	4.71368	3.16282	4.8438	3.88803	5.60876	5.56282	4.38184	4.35406	3.79167	5.80769	5.15684
130	4.12393	3.09231	4.48953	3.47842	5.41731	4.49231	4.2047	3.99188	4.46218	5.80043	5.35705
140	4.14124	2.9062	3.62756	3.07585	4.74167	4.41603	3.92329	4.11132	4.06987	5.28846	5.2
150	3.89509	3.26859	3.81303	3.22949	4.62137	3.29573	3.34765	4.41474	4.23654	4.82756	4.44679
160	3.49551	3.20833	3.5485	2.77051	4.28526	3.45492	3.35449	2.93675	3.72692	3.69551	3.59316
170	3.12628	2.61902	3.5953	2.87115	4.28355	3.42179	3.20833	3.35662	4.07414	3.47906	3.96047
180	3.07094	3.14124	3.81773	2.66966	4.64487	3.80427	2.71496	3.03269	4.44167	3.47906	3.50748
190	3.0594	2.46004	3.27949	2.29359	4.03419	3.42543	2.75214	2.45085	2.86496	3.08568	3.68526
200	3.03397	2.92115	3.08568	2.80961	5.21645	3.13462	2.19423	2.36004	3.50449	3.51816	3.39786
210	3.55385	2.36774	3.53633	2.61902	5.29423	3.13462	2.45897	2.61218	3.6297	2.92372	3.21773
220	3.56346	2.65064	3.44017	3.02863	5.7485	3.13718	2.38889	3.33846	4.04915	3.08248	3.63526
230	5.71987	3.92329	3.16282	4.54551	5.96603	3.60662	2.07415	4.03974	4.21667	3.11111	2.87115
240	6.0703	4.2047	3.33013	5.39893	6.42521	5.27842	3.10299	5.0485	5.62863	2.73632	3.62756
250	6.62585	6.09038	4.43483	6.05406	7.07991	5.92885	4.35812	6.06581	6.18462	3.74872	4.93568
260	7.26026	7.28333	4.78697	6.98803	7.83611	6.90919	5.48013	6.94444	7.28932	4.94744	5.51389
270	8.31474	7.77949	5.99722	7.53269	8.14829	7.98996	6.84359	7.91111	7.8594	6.14765	7.15385
280	7.90769	8.30192	6.17393	8.04979	8.66047	8.27714	7.64808	8.98483	8.50962	7.11709	7.67821
290	9.47479	8.99252	6.52329	8.96902	8.9203	8.46645	8.33355	9.55299	8.97799	8.6359	7.96517
300			7.69765	9.27158	9.64979	9.23461	8.93162	9.9765	9.34786	8.2891	9.30214
310			7.98226	9.84573	10.2239	9.35769	9.90449	10.1979	9.84551	9.3641	8.96709
320			7.97329	9.99701	10.7288		9.69594	10.9132	9.78483	10.0387
330			8.70385	10.8872			10.5472	11.2329		10.1194
340			9.3812							10.6765
350
360
370
380
390
400
410
420
430
440
450
460
470
480
490
500
510
520
530
540
550
560
570
580
590
600
610
620
630
640
650
660
670
680
690

## Sheet: Chr_Span_JDU440_hcp-1+zwl-1
time from nebd (s)	embryo_1	embryo_2	embryo_3	embryo_4	embryo_5	embryo_6	embryo_7	embryo_8	embryo_9	embryo_10	embryo_11	embryo_12	embryo_13	embryo_14	embryo_15	embryo_16	embryo_17	embryo_18	embryo_19	embryo_20
0	5.00662		8.1812	8.15962	4.60278	6.41389	8.50214	8.24808	9.06816	4.91923	8.34829	5.20983	8.45299
10	4.55064		7.1015	7.41175	4.12671	7.48397	9.03462	6.8235	7.83633	5.45085	7.33654	5.69573	7.23034
20	4.10449		5.49167	5.84081	4.32543	5.96346	8.0203	4.9765	8.53397	4.18056	7.27051	4.10919	6.56538
30	3.23739		5.41731	5.07906	3.98483	5.6859	6.56667	4.61367	7.68077	4.67372	7.78996	4.71325	4.85427
40	4.56068		4.88611	5.99722	5.0344	4.70791	4.6515	4.17009	7.54615	3.79915	6.73291	4.40919	5.33953
50	3.9297		5.03291	6.32265	6.02051	4.6515	4.11004	5.22415	6.30043	3.53633	5.28803	5.11261	5.51752
60	4.35		4.07906	6.36175	5.89487	3.15406	3.75876	5.24808	5.47265	4.55513	4.94744	5.22009	4.69551
70	4.14936		4.14081	6.85235	5.5765	3.44551	5.45085	5.98376	5.34188	5.37778	5.13611	5.64658	4.65641
80	3.6797	4.60278	5.13611	6.35021	4.96944	3.26239	5.31859	6.46731	5.275	6.00748	5.35363	5.07906	5.35897
90	6.87607	4.77799	5.23056	7.43269	4.6297	3.29252	5.79722	4.98825	5.67115	5.89274	4.61367	5.22009	6.21667
100	5.75556	3.93355	7.09573	8.00299	5.19359	3.32543	6.9703	5.55043	6.31047	7.07244	4.9985	5.58483	6.48782
110	6.05705	6.15876	7.74808	8.95427	5.67308	3.92842	4.87521	6.34274	7.18633	7.49722	5.63227	5.72778	6.74957
120	7.28654	5.69808	8.26859	9.30427	7.57329	4.51645	5.14103	6.93184	7.71667	8.18056	6.86026	5.66795	7.34316
130	8.6453	6.41667	9.18996	9.80171	9.83355	5.12863	6.06453	7.57265	9.30299	8.87607	7.90641	6.72863	7.58333
140	8.80021	8.26709	10.5637	10.4788	12.7844	5.98675	6.77991	8.51197	11.6588	9.29872	8.61346	7.02564	8.4015
150	8.81004	9.65769	11.2459	10.2962	14.5767	6.8391	7.12244	10.0286	12.7427	10.9015	10.4528	9.17949	8.97564
160	11.2825	11.1859	12.012	11.5771	15.6111	8.30534	8.36368	10.5483	14.1438	10.5974	11.6175	9.89957	10.1842
170	12.231	10.8609	13.3972	12.2342	16.909	10.6269	9.84573	11.7455	13.4586	11.8622	12.1297	11.2767	13.5041
180	13.5622	12.75	13.4239	13.3269	17.0062	12.9594	10.6372	12.3694	15.0998	13.7023	12.8241	10.9857	12.7222
190	13.8523	12.7293	14.5062	12.3737	16.6143	14.6335	11.4414	14.0688	14.6365	13.3538	13.9231	11.6139	14.2286
200	13.2066	12.8925	14.0303	13.118	17.0908	15.841	12.26	14.0622	14.4855	13.9459	14.4782	11.5387	14.8259
210	13.5628	13.6085	14.7303	13.3739	17.697	15.8194	13.8068	14.5808	13.9145	14.3618	14.9799	11.8547	15.675
220	14.1724	13.4024	15.5468	13.8831	17.9115	17.0823	13.7162	14.5474	14.0214	14.3053	15.4521	12.3808	16.5103
230	14.2383	16.1323	15.2551	14.6303	17.8917	16.5526	14.5788	14.4938	14.9079	13.8992	16.0263	12.3508	16.212
240	15.7147	14.7165	14.7355	13.5833	17.9013	17.5145	14.9432	14.1229	14.9487	13.9066	16.4079	12.6701	16.4538
250	14.8301	15.1201		14.1244	17.6961	16.9269	14.7718	14.788	15.3814	14.3897	16.8923		16.212
260	15.1615	15.8893		13.9647	16.8316	17.9855	14.1235	14.7231	15.3611	15.0863	16.8526		15.8194
270	15.7395	16.6669		14.8	16.6959	17.5827	14.2652	14.9329	15.9598	14.8056	16.5028		16.1662
280	15.5124	17.1041		14.6306	16.3466	17.8291	14.765	15.3795	15.6028	14.7186	16.953
290	15.2669	16.9816		14.8722	16.4511	17.8359	14.9487	15.5645	15.4957		16.685
300
310
320
330
340
350
360
370
380
390
400
410
420
430
440
450
460
470
480
490
500
510
520
530
540
550
560
570
580
590
600
610
620
630
640
650
660
670
680
690

## Sheet: Pole_Dist_JDU440_hcp-1
time from nebd (s)	embryo_1	embryo_2	embryo_3	embryo_4	embryo_5	embryo_6	embryo_7	embryo_8	embryo_9	embryo_10	embryo_11	embryo_12	embryo_13	embryo_14	embryo_15	embryo_16	embryo_17	embryo_18	embryo_19	embryo_20
0	9.70356	10.5188	11.6926	11.1542	9.68958		9.45097	12.9136		9.90621	11.7069	10.6785	10.6615
10	9.81733	10.632	11.7754	11.4125	10.1202		10.1705	12.9107		10.0772	12.1772	11.3969	11.4538
20	9.91205	10.795	11.9133	10.8696	10.4669		9.89196	12.4517		10.2271	12.6675	11.567	11.2848
30	10.542	10.7261	11.7657	12.1535	10.6363		11.1273	13.2632		10.7126	12.4848	11.4463	11.7286	7.05527
40	10.243	11.2623	11.9479	12.8569	10.3542		11.7012	14.4675	11.956	11.3817	12.9773	11.6081	12.489	8.02809
50	10.3096	11.6611	11.7739	13.0789	10.4671		11.509	14.9028	11.6773	12.3468	13.1385	12.1953	13.5857	8.80066
60	11.8263	11.9038	11.4632	13.4013	11.0379	12.665	10.7471	15.9476	12.9455	12.7203	14.0999	12.914	14.5936	10.8787
70	13.7292	13.1967	12.9801	14.2063	11.9889	15.3374	12.258	17.1857	14.7358	15.6675	14.2795	13.2797	16.1313	12.8996
80	16.3549	18.8942	14.7519	15.7078	14.3644	18.6999	13.7771	18.881	16.5778	17.7711	15.0237	14.6247	17.8481	14.8967
90	19.3744	21.6552	19.0876	17.6285	19.1377	21.4203	14.8245	19.8338	18.4202	20.2936	16.5717	15.2549	19.5719	17.1064
100	20.4598	23.5694	22.2152	20.324	21.828	23.1126	16.4187	22.832	19.7702	21.5546	17.0577	16.9591	20.824	19.0418
110	21.354	24.2612	22.269	23.0173	23.0691	23.8369	19.1835	22.6973	22.2575	22.6482	18.836	18.0965	20.6321	21.4895
120	21.2128	23.0164	22.7859	23.673	23.2553	24.0479	20.88	23.6525		22.5641	20.3934		21.1456	22.4526
130	20.8639	24.4814	23.2824	24.0981	23.7741	23.3538	23.0949	22.9776	22.3528	21.8527	21.2407	21.4052	22.1804	22.5869
140	21.2942	25.4832	22.4646	23.3131	23.6442	23.4933	23.2448	23.1539	21.4549	22.216	20.5052	22.4942	22.5102	23.2696
150		24.7352	22.7279	24.509	24.3323	23.1408	23.3003	22.0817	21.4496	22.7386	20.8404	21.3941	22.0753	22.614
160	21.1824	24.2151	21.4901	24.0363	23.1334	21.8154	21.2491	22.6208	21.5592	21.8816	18.8922	21.6591	22.4612	22.5437
170	21.2253	24.7279	23.0628	23.6159	23.4672	21.3508	22.541	22.0902	21.2734			21.1829	22.0384	21.4087
180	21.2684	24.0998	22.7607	24.1243	23.4848	20.8585	21.6341	21.8881			19.7861		21.7023	21.1822
190	21.9233	23.4809	23.2518	22.8177	23.7918	20.2326	21.4812	21.3831			19.2357	20.1737	21.8657	21.3987
200	21.9654	24.0991			21.6567	20.8866	22.1152	20.808	20.7965		20.2347	20.2355	21.0173	21.475
210	20.2853	23.4029	22.8736	24.4589	22.5699	20.233	21.0655	22.0189			20.1226	19.4702	21.3444	20.6617
220	20.5151	23.1594		23.4058	22.3658	20.7987	23.1646		20.8593		19.3288	19.7315	21.553	20.5749
230	20.5152	23.1469	22.8781		22.3817	20.2099	22.5367		19.5074		20.8165	20.2312	21.9983
240	19.722	22.7387	20.914		21.5959	20.6701	21.9617	21.7435	19.4052		19.8075	19.3378	21.3337
250	18.9153	22.9659	20.9941		21.9359	21.4327	22.3579	21.4562			19.3041	21.3041	21.8269
260		21.899	20.804		22.3969	20.5959	22.5093	19.0812	19.4112		20.388	21.3151	19.8599
270		21.1128			21.0772	19.6351		20.6475	19.9545		20.385	21.9337	20.0894
280		21.0784	21.842		21.6601	19.1788			19.4239		20.9955	22.069	21.1076
290		20.8765			21.8511	19.0176			19.7569		20.4438		20.6034
300		21.5261			22.808	19.5486			20.2704		21.1715		20.2284
310		22.4912			23.3378	20.094			19.4294				21.079
320		22.3133			23.6177	20.6207			19.9895		21.7657		21.1465
330		21.6889			23.2766	21.6576			19.4294		22.0947		21.961
340					22.3058	21.1149			19.9895				21.4731
350						21.9776							21.7179
360						22.2972							22.249
370						22.1543							23.3303
380						22.3035
390						22.6139
400						22.6103
410
420
430
440
450
460
470
480
490
500
510
520
530
540
550
560
570
580
590
600
610
620
630
640
650
660
670
680
690

## Sheet: Pole_Dist_JDU440_hcp-1+bub-1
time from nebd (s)	embryo_1	embryo_2	embryo_3	embryo_4	embryo_5	embryo_6	embryo_7	embryo_8	embryo_9	embryo_10	embryo_11	embryo_12	embryo_13	embryo_14	embryo_15	embryo_16	embryo_17	embryo_18	embryo_19	embryo_20
0	10.8905	8.15801	10.7849	8.85309		10.9872	10.8095	10.2963	11.0368	10.8241
10	11.2549	8.45343	11.0619	9.14211		11.0443	11.5958	11.1663	11.5461	11.3833
20	11.6722	8.52579	11.1507	9.10549	9.60892	11.3411	11.9971	11.3755	11.2578	11.4165	9.70189
30	11.6273	8.72805	11.0894	8.80446	9.89859	11.2334	11.5333	11.2208	10.7283	11.8996	10.167
40	12.2135	8.86976	10.9321	9.48044	10.4358	11.3519	11.6828	11.5011	11.0677	12.4984	10.5832
50	12.3402	9.51075	11.014	10.191	11.3897	12.9699	11.9139	12.1593	12.3067	13.4734	11.6204
60	12.829	10.0205	11.8955	11.9752	13.2908	15.1681	12.375	12.5938	13.7454	14.6597	12.8784
70	13.8873	12.1079	13.2337	13.1779	14.7615	15.3305	13.7253	13.5749	14.5342	16.0373	14.4095
80	14.274	13.2428	15.0955	15.3181	15.535	16.3452	14.8835	14.2022	15.5382	17.1109	15.5105
90	14.8017	14.9058	16.2255	16.4664	16.3573	16.7952	15.9578	15.3955	16.1544	17.6153	16.2381
100	16.3444	15.7787	17.2532	16.9269	16.4898	17.3705	16.7114	16.1639	16.503	17.7841	16.4187
110	16.2647	16.0354	17.7094	16.2165	17.0869	16.6049	16.4277	16.1488	16.3252	17.4383	16.6404
120	16.3731	15.7098	17.8849	15.754	16.9443	16.3278	15.7294	15.7677	16.0523	16.8716	16.1187
130	15.8468	15.1512	17.2756	15.3079	16.5176	15.0531	15.2641	15.4468	15.193	16.2228	15.6063
140	15.0085	15.0639	17.0809	14.6097	15.9504	15.003	14.9272	15.1231	14.732	15.6065	15.081
150	14.0556	14.2789	16.7099	13.9793	15.4231	14.6931	14.1363	14.7708	14.2837	14.8829	14.9722
160	13.5185	14.1694	16.0019	13.233	14.8173	14.0664	14.2063	14.3098	13.1867	14.5809	14.3569
170	13.44	13.6302	15.5546		15.2185	14.1983	14.2951	13.2222	13.7134	14.2429	13.8696
180	12.9732	13.3946	15.2795	13.5266	15.4296	13.4272	13.994	13.4562	13.5501	14.3667	13.779
190	12.6951		15.4464		15.3885	13.6612	13.7271	13.3612	12.9971	13.9953	13.7395
200	12.8639	12.9793	13.8592	14.0785	15.4699	13.411	13.6967	13.8383	12.5615	14.0561	13.8737
210	12.7502	13.9166	14.9378	14.1346		13.2481	13.9303	13.9177	13.8268	14.6499	14.3151
220	12.938	14.074	14.9201	14.7965	16.6632	14.61	14.4385	14.5627	14.4428	14.6155	14.5701
230	13.4637	15.5204	15.4179	16.1669		14.7817	14.9284	15.4375	15.2137	14.8755	15.0516
240	14.1711	15.7298	15.7503	16.6684	17.3126	16.4647	15.8581	16.5086	16.1312	15.5984	15.421
250	15.5051	17.5525	17.0019	18.2006		16.8544	16.4064	17.3444	17.2358	16.3435	16.6035
260	16.0368	17.9909	17.8125	19.1473	18.2394	18.276	17.2833	18.443	18.3376	17.277	17.4613
270	17.311	18.5619	18.6015	19.9264	19.185	19.1199	18.2975	19.4734	18.4831	19.375	18.1609
280	17.6277	19.4454	19.8485	20.8332	19.9928	19.7651	18.6928	20.2311	19.5593	19.6529	19.0284
290	18.8684	19.692	19.7477	20.8652	20.9489	20.4371	19.2753	20.4453	19.9587	20.7806	19.2369
300	19.3812	20.5868	20.8493	21.5583	21.3139	20.8748	19.9903	21.0793	20.7906	20.6214	20.0448
310	19.5381	21.8538	21.1627	21.9638	21.6963	21.2565	20.3368	21.3319	21.213	21.9412	20.538
320	20.0955		21.6384	22.5215	22.0604	22.1432	20.4403	21.5084	21.5678	22.3111	21.0163
330			22.1659	22.6966		22.314	20.5509	21.89		22.6416	21.4038
340			22.6036	23.1949		22.7981	20.9581	22.3961		22.8807
350
360
370
380
390
400
410
420
430
440
450
460
470
480
490
500
510
520
530
540
550
560
570
580
590
600
610
620
630
640
650
660
670
680
690

## Sheet: Pole_Dist_JDU440_hcp-1+zwl-1
time from nebd (s)	embryo_1	embryo_2	embryo_3	embryo_4	embryo_5	embryo_6	embryo_7	embryo_8	embryo_9	embryo_10	embryo_11	embryo_12	embryo_13	embryo_14	embryo_15	embryo_16	embryo_17	embryo_18	embryo_19	embryo_20
0	12.3504		7.35787	10.2243	12.4461	9.9656	11.7751	11.0244	11.1231	10.2375	11.4271	12.2531	11.4372
10	12.6669		6.94909	10.7231	12.2314	9.15125	12.4137	11.5018	10.2545	10.2994	11.8838	12.5207	11.3995
20	12.7666		6.95272	10.7651	12.8623	9.05322	12.3278	11.6649	10.1506	11.1673	11.9862	12.6443	11.6407
30	13.0496		7.59376	10.7401	13.7641	9.43975	12.1291	11.6548	10.2399	12.0431	12.4921	13.2124	12.0384
40	13.3059		8.08054	11.3328	14.3078	9.73567	12.9688	11.6307	10.7786	12.6258	12.7649	13.9266	12.5161
50	13.7957		9.18084	11.689	14.9571	9.68625	13.4442	11.5397	10.8441	13.8752	12.7268	14.5945	13.4788
60	14.3811		9.9371	12.4466	15.6661	10.4949	14.2814	12.1042	11.8299	14.4854	12.522	14.9242	14.1243
70	15.498		11.5699	13.2875	15.5516	11.0794	15.3557	12.5485	12.1546	15.8458	12.6752	15.8899	15.3055
80	16.4257		13.6415	14.4014	15.4082	11.6208	16.1307	13.5526	12.8971	16.7024	13.2713	16.3207	15.9567
90	17.5876		15.0034	15.2689	16.1617	12.5412	17.0296	14.5386	14.7703	17.7459	14.2805	16.9286	17.7367
100	18.3287		17.7488	17.5662	16.9395	13.6544	18.0215	15.742	16.8308	18.7148	15.3709	17.1034	18.8007
110	18.9426	17.5491	18.9533	19.4951	17.5897	14.8649	18.4574	16.8847	18.7704	18.7518	16.1495	16.9413	19.1521
120	19.7814	18.441	20.0532	20.2411	18.8877	15.7427	18.6106	16.7461	20.0172	18.9444	17.4582		19.5894
130	20.4903	19.6997	20.0328	20.9071	21.053	16.89	18.8655	17.7128	22.429	19.9189	18.1641	17.6417	19.6766
140	20.8681	20.846	21.0681	21.4419	22.7805	17.6297	19.3385	18.2799	22.7739	20.1536	19.2228		20.6787
150	20.9346	22.3618	20.5415	21.0229	24.1675	18.6827	19.9326	18.678	23.7321	21.3451	20.2093	19.4645	21.3434
160	21.2319	22.4866	21.3522	22.1639	24.9497	19.6535	20.4086	18.7768	23.544	21.2676	20.6427	19.2661	21.8194
170	21.9166		22.1176	22.2852	26.3507	21.3979	21.0396	19.7015	23.5702	21.9368	21.1784	20.1388	22.7275
180	22.7746	23.3644	22.0718	22.9314	25.1576	22.5802	21.5646		23.7485	23.2822	21.7324	19.8858	22.1424
190	23.1366	22.4906	22.7684	21.9793	25.238	24.0425	21.4764	20.5375	22.4614	23.0474	22.4805	20.6543	23.0481
200	22.9721	23.0644	22.8076		25.5453		22.5776	19.7544	23.4649	23.0432	22.5856	20.749	23.1283
210	22.7294	22.8296	23.0303	22.5324	25.6548	24.4324	23.0304	21.2325	22.0802	22.9147	22.9375	20.7079	23.5077
220	23.0899	23.4665	23.2829	22.7384	25.7851	24.0932	23.2972	21.5438	23.1404	22.7058	23.0336	21.0296	23.3626
230	22.9445		22.7865	22.6872	25.4004	24.1751	23.5794	21.8078	23.2614	22.1418	23.1187	21.2523	23.3626
240	23.3972	23.5951		21.9668	25.0499	23.9273	23.1315	21.701	23.4275	22.431	23.2644	21.5777	23.0308
250	23.2123	24.2706		21.6917	24.7158	23.6088	22.6464	21.4927	23.2398	22.4483	23.453		22.9631
260	23.3073	24.4858		21.6692	24.1375	24.3015	22.6166	21.6686	23.5429	22.5612	23.2245		22.8322
270	23.3031	24.9841		21.8473	23.6107	24.0537	22.4088	21.3803	22.8269	22.509	22.6777		22.6968
280	23.4783			21.528	23.4892	24.1276	22.4956	21.7895	22.8854	22.4595	22.8385
290	23.7403			21.8432	23.7353		22.4699	21.8848	22.7798	22.4051	22.4904
300	23.5769			22.2175	23.8606		22.0544	22.2547	23.0258		22.7176
310	23.8856			21.7471	23.8072		22.7591	22.5305	23.2441		22.3474
320
330
340
350
360
370
380
390
400
410
420
430
440
450
460
470
480
490
500
510
520
530
540
550
560
570
580
590
600
610
620
630
640
650
660
670
680
690
