# Supplementary material for: BUB-1 promotes amphitelic chromosome biorientation via multiple activities at the kinetochore
Source: eLife journal article supplement (doi:10.7554/elife.40690), 2018-12-14
Supplement: supp [file elife-40690-supp-v1.zip › elife_poa_e40690_Figure_4_source_data_3.xlsx]

## Sheet: Chromosome segregation
	amphitelic	merotelic	mono-oriented
JDU440	12	0	0
JDU440_BUB1	5	18	0
JDU440_HCP1	0	0	14
JDU440_HCP1BUB1	0	11	0
JDU440_ZWL1	6	6	0
JDU440_HCP1ZWL1	0	0	14
