# Supplementary material for: BUB-1 promotes amphitelic chromosome biorientation via multiple activities at the kinetochore
Source: eLife journal article supplement (doi:10.7554/elife.40690), 2018-12-14
Supplement: supp [file elife-40690-supp-v1.zip › elife_poa_e40690_Figure_5_figure_supplement_1_source_data_1.xlsx]

## Sheet: Chr_Span_Control
time from nebd (s)	embryo_1	embryo_2	embryo_3	embryo_4	embryo_5	embryo_6	embryo_7	embryo_8	embryo_9	embryo_10	embryo_11	embryo_12	embryo_13	embryo_14	embryo_15	embryo_16	embryo_17	embryo_18	embryo_19	embryo_20
0		6.73291			6.69081	7.81432	7.26581	7.79338
10		6.34274		8.42863	7.22479	6.96581	7.56731	7.5015
20		7.56624	9.54658	7.91603	7.19637	6.59936	8.61346	7.51966
30		6.20321	9.12692	8.0985	6.13077	6.38846	9.46581	7.02949
40		6.82949	7.41603	5.7265	5.7938	5.65556	8.14915	6.45021
50	6.89274	5.48013	6.34274	5.00769	4.87714	5.00662	7.05855	7.6485
60	5.87543	6.27308	4.8438	4.70577	4.71175	4.65577	5.29679	6.28974
70	6.52329	4.52991	7.33611	3.88462	4.73226	7.21303	4.97115	5.23932
80	6.99936	5.2812	6.05791	5.07564	5.21645	5.64423	5.3547	5.97714
90	5.75342	4.40278	5.02671	5.18675	7.04551	6.13568	6.01709	4.01453
100	6.91581	4.72137	4.64936	5.79103	5.77329	5.41026	5.32265	4.30021	5.99145
110	5.9735	4.91816	4.69551	7.3594	5.16368	4.42863	7.05214	4.01453	4.20491
120	5.91218	6.9703	7.75705	7.78825	4.96987	4.44231	9.08675	4.01453	3.11474
130	7.50577	5.47735	9.7265	9.70342	5.34188	3.79359	9.80641	5.83226	3.78632
140	6.26538	6.62115	13.512	9.64209	6.73761	4.78697	10.2585	6.0906	3.29808
150	5.13718	6.70962	11.8682	9.93996	4.06132	5.14103	9.5109	6.16432	3.31368
160	5.04038	7.19188	11.7504	9.99316	4.39209	4.91047	11.2419	8.33333	3.47991
170	6.65491	5.33846	8.84594	12.9797	4.30684	5.70598	10.2564	9.58269	3.89915
180	7.81432	4.49786	5.09038	10.9996	4.02179	5.21111	10.2675	7.90598	3.58355
190	4.38184	4.14829	4.55513	10.4248	3.86987	3.56197	10.0325	6.5547	4.38162
200	4.23184	4.52329	3.69615	11.663	2.96261	3.60363	8.45107	5.83611	4.09487
210	3.43803	4.21197	3.99124	10.703	3.54017	5.63803	6.30705	6.5547	5.3515
220	3.03697	4.62521	3.69551	9.63782	3.5515	3.92329	6.89081	5.84487	6.0906
230	3.37778	3.75876	4.18056	10.5098	4.76004	5.36517	7.37265	4.62863	6.63162
240	3.96047	3.13462	4.44231	11.0291	6.36111	5.69124	6.95192	3.85214	7.58846
250	4.3312	3.875	4.95513	12.0613	6.45363	5.01068	7.59231	3.96603	7.17799
260	4.79124	4.79744	6.34658	12.3573	7.6485	5.34188	4.60513	3.81795	7.90598
270	5.90299	4.8938	6.69402	13.097	8.01282	4.06047	5.3515	5.27094	8.23761
280	5.13718	6.05406	7.15385	11.4974	7.56816	5.05897	5.56474	5.16368
290	5.59594	5.96004	7.57009	13.0823	8.0547	6.05577	4.06132	5.84487
300	5.70192	6.12778	8.39765	12.8085	7.36795	6.55299	3.53205	5.71453
310	5.99359	6.46731	8.0156	13.2051	7.67607	7.70577	3.10556	6.25256
320	6.49872	6.53568	8.56282	13.4301	7.34316	6.20684	2.7859	6.01517
330	6.39808	6.73483	8.70812	12.2421	7.61859	6.30043	2.89252	5.71453
340	6.6985	6.79038			7.23034	6.12585	2.99145	5.64209
350	6.80385	6.37735			7.43953	6.30043	3.43376	6.35299
360	6.26538	7.20363				5.2	3.42051	6.21688
370		7.3594				5.6015	3.63397	6.5938
380		7.46496				4.8688	4.5188	7.46325
390		8.50214				5.37222	4.82671
400		8.20577				5.62671	5.13825
410						5.55556	4.60513
420						5.67158	5.03162
430						6.15171	5.02244
440						5.64893	6.08974
450						5.77628	5.45812
						5.76175	5.86731

## Sheet: Chr_Span_hcp-12
time from nebd (s)	embryo_1	embryo_2	embryo_3	embryo_4	embryo_5	embryo_6	embryo_7	embryo_8	embryo_9	embryo_10	embryo_11	embryo_12	embryo_13	embryo_14	embryo_15	embryo_16	embryo_17	embryo_18	embryo_19	embryo_20
0	9.12115	7.36261	10.5763	7.81859	10.0519			6.79658	9.33162			7.96111	12.2459	7.90726	10.2786	8.1391		7.70427	8.12393	8.00064
10	8.33462	10.388	11.0141	7.05278	10.1534			8.19829	6.55897			8.08761	11.4635	7.64103	9.55726	8.32201		7.51517	7.96517	7.08205
20	7.71667	10.1241	10.1355	6.6453	9.61752			6.64487	6.6985			8.01111	6.72735	7.74808	8.77692	7.30876		7.10299	7.48953	6.43248
30	6.87457	10.3137	10.8346	6.03697	9.11261			6.56667	7.0141			7.36517	4.59893	7.68761	8.63269	8.05214		5.54316	6.93077	6.93205
40	6.46902	7.48846	7.54979	5.89487	7.21902			6.51111	6.31047			8.04573	4.68269	7.09722	7.51752	8.15385		5.28611	6.3406	5.77821
50	5.98974	7.9062	9.16175	5.06154	7.0141	10.9498		6.61624	5.05256			5.71389	5.99145	8.05983	5.81175	7.91218		5.78205	6.22927	5.90021
60	7.35855	6.18013	6.02778	6.36453	6.8094	7.64637		6.67692	5.6985			5.09701	5.45705	5.91859	6.01368	5.87329		4.5641	6.09915	6.85256
70	6.46261	6.48825	6.21944	5.51389	5.86389	6.29081		6.57735	6.92094	8.27991		5.28953	7.16538	5.74231	7.10043	5.61047		5.51538	5.48996	5.20983
80	5.67308	6.58953	5.71795	6.22265	5.92885	4.82906		6.55299	7.56218	8.18056		5.66368	7.06496	4.3359	5.22415	5.76966		5.10705	5.59829	6.69338
90	5.14594	5.63974	5.78462	5.20726	5.7938	5.16175		6.66368	7.7438	7.27927		4.87372	7.16538	5.23889	6.07756	5.7938		6.01432	5.19209	5.92543
100	4.95214	6.83761	5.22863	6.38718	4.99231	5.03739		5.58654	8.06816	5.91218		5.0094	5.77821	4.78697	6.93184	8.19829		4.46432	5.16026	5.97244
110	5.81816	8.17927	6.48504	6.03697	5.95064	5.30748		5.06944	8.12756	4.87714		6.48803	6.52756	5.79765	6.17521	8.21902		4.97564	5.02286	5.55256
120	6.10427	6.15791	6.76752	6.82906	5.14594	5.70192		5.00107	7.91496	5.98846		9.26368	6.32521	6.11923	8.1297	7.60214		5.22628	5.72735	5.97714
130	6.51111	6.4547	7.65299	5.70192	6.16859	5.28846		4.6515	5.54359	5.09338		12.5607	5.07906	6.65299	7.29979	9.00962		5.66645	6.29359	7.44038
140	6.78739	6.24466	8.24402	5.68056	7.80662	7.65598		4.87265	5.87329	5.3438		16.1611	6.25256	7.92393	9.25	8.37009		7.40278	6.50641	7.79338
150	8.25833	4.69893	6.75556	6.0453	6.73184	9.44081		6.95278	5.23483	5.30385		15.0827	7.28141	8.47842	14.9859	8.68974		7.4703	7.94466	8.28248
160	9.81261	4.29551	7.53269	4.97415	5.39893	9.2015	6.2844	8.83312	5.31517	5.56282		14.9385	8.76068	7.84295	15.0421	10.9368		7.26581	8.86667	13.9994
170	11.1951	6.49872	8.97885	5.89274	9.38226	14.3	7.04551	10.078	5.94936	5.41026		14.0141	8.69594	9.53291	14.0066	12.2857		7.01068	9.53141	18.4955
180	10.9348	7.74915	12.6583	5.17585	11.8921	13.8184	6.22415	12.5004	7.26816	5.50427		17.1429	10.2613	10.4011	14.5746	14.1767		6.05214	9.87179	18.6904
190	9.00085	8.5812	13.1912	4.93568	12.0126	15.0083	9.0812	11.2564	7.48718	5.88077		14.7363	10.8323	9.44402	16.9571	11.5468		6.62222	9.59615	18.1577
200	11.9714	11.6812	16.9534	6.21944	15.372	14.1754	9.63013	14.2024	8.6359	6.92799		16.41	11.2915	10.3573	16.5598	11.3571		7.43269	10.4098	18.1032
210	9.32821	9.09338	16.0712	8.15726	18.3519	15.2111	8.04402	13.7825	10.9697	7.6		16.459	12.7566	10.1763	16.8526	11.8143		7.90598	7.31987	16.6752
220	8.78611	11.4028	16.788	7.18269	16.5543	15.9265	8.69594	14.6186	13.0036	9.7265		16.4752	16.1974	10.472	15.7162	11.422		9.47479	7.64103	17.4669
230	7.98013	13.1897	15.6694	8.25876	17.7603	15.7639	9.32927	15.9673	14.528	10.9701		15.6387	15.2968	13.6754	12.5105	10.4788		9.0906	7.58397	17.6075
240	9.08675	15.5267	14.9566	7.58098	16.8376	18.4259	11.2915	16.5936	11.8724	9.93397		14.6224	12.6357	17.9105	14.2765	10.6241		9.87372	8.67799	18.4429
250	12.6156	14.8763	16.4904	7.96474	17.7774	17.4019	11.487	15.5989	10.1891	11.8126		13.7239	13.8876		14.6011	11.4603		11.1848	11.8692	16.3865
260	12.6006	14.306	14.1449	7.63568	16.1254	16.1705	12.0011	15.1835	11.4034	14.1109			13.2827	14.6833	15.2085	11.681		9.45983	13.9603	16.7684
270	11.5878	13.2049	15.8145	7.39808	15.8966	15.0842	11.5068	13.5592	11.491	13.5459			14.4863	14.163	14.8947	12.3917		10.5338	13.6316	15.9628
280	12.3139	13.022	16.2327	8.12393	15.8825	13.4274	11.9829	12.6487	11.2382	13.0045			13.8135	13.9252	15.8412	11.3357		10.2415	14.5316	16.5267
290	12.5859	13.3449	16.3179	7.92179	17.3656	14.1335	11.4769	12.5769	10.609	13.0607			12.8241	14.0182	15.2517	12.1252		10.1427	15.1769	15.959
300	14.0329	14.0284	15.6594	8.26987	17.3229	13.4684	11.4376	11.2449	10.3103	13.9707			13.0137	12.4096	16.0073	12.2675		11.0519	15.4323	16.4876
310	13.6382	14.4729	16.4709	8.56175	17.2308	13.8177	11.6536	13.0464	10.8697	13.7558			14.2286	14.2494	15.1737	12.0135		9.82094	14.4252	17.2489
320	14.0882	14.4056	16.6568	8.76538	17.6224	14.3036	12.447	13.2015	11.0308	14.0573				12.8594	16.0889	12.6793		10.7741	14.6968	16.5857
330	13.5216	14.9152	16.0944	8.44252	17.3908	14.8237	12.4816	13.6895	11.7218	15.1032				13.7891	14.8831	13.3222		9.92436	14.5558	16.944
340	13.6979	15.0874	16.4425	9.22329	17.3229	15.1662	13.0464	14.5385	12.4547	15.0291				14.1846	14.9412	13.6799		10.6795	15.1951	17.4107
350		15.6115		9.67457	17.5419	15.4442	13.6756	15.3207	12.3934	15.1429				14.9056				10.8455	15.3848
360		15.716		9.62073		15.7774	14.0218		12.9724	15.9468								11.4201
370		15.825		10.5906			13.4547		13.3158	15.7936
380							13.2908			15.6735
390										15.515
400
410
420
430
440
450

## Sheet: Pole_Dist_Control
time from nebd (s)	embryo_1	embryo_2	embryo_3	embryo_4	embryo_5	embryo_6	embryo_7	embryo_8	embryo_9	embryo_10	embryo_11	embryo_12	embryo_13	embryo_14	embryo_15	embryo_16	embryo_17	embryo_18	embryo_19	embryo_20
0		11.9709			11.1535	11.0109	9.4235	12.2952
10		11.9748			11.2528	10.6353	9.60342	12.1343
20		12.3643	12.23		11.2497	10.8362	10.0791	12.3648
30		12.4191	12.6797	12.6786	11.3721	10.6917	10.0791	12.4512
40		12.6042	12.6249	12.1031	11.302	10.2766	10.3141	12.1759
50	12.8485	12.9668	12.4119	12.2377	10.897	9.89566		12.3351
60	12.6735	13.2459	12.2106	12.2655	10.7035	9.71632		12.1274
70	13.2456	13.0537	12.3734	12.9021	10.3717		11.7632
80	14.2842	13.724	12.9086	13.5313	11.2793		10.9078	12.2593	8.63072
90	14.3759	14.1483	13.744	14.4179	11.9185		12.6366	12.4896	8.55304
100	15.037	15.1694	14.95	15.6653	12.0884	13.7495	14.98	13.2559	9.77742
110	15.948	15.8195	16.5622	17.4722	12.5347	15.8122		13.5265	9.76241
120	16.6107	16.4415	17.5159	18.2527	11.9293	17.7071	15.6705	14.4076	11.4056
130	17.5608	16.875	19.2699	17.8407	12.1457	19.19	16.7605	15.3974
140	18.7467	17.056	19.5653	17.6011	12.2404	21.9695	18.5254	16.0899	13.2655
150	18.9481	17.3109	18.9008	17.5301	12.8253	25.1712	18.5534	16.7067	13.9167
160	18.5247	17.8722	17.2782	17.602	13.7024	26.9071	19.63	16.9628	14.6538
170	17.9762	19.4653	17.6023	17.9111	14.7838	25.315	20.5579	17.1458	15.2331
180	18.7414	19.1057	16.3526	18.4027	15.4916	27.7853	21.4293	17.7268	17.0834
190	19.346	18.6517	16.2945	18.5704	15.9766	26.6652	21.9583	17.4072	17.8386
200	19.4889	17.6887	15.4974	18.8911	15.6891	25.4159	22.1057	17.0079	18.3158
210	20.0415	18.699	17.6135	19.1768	17.0618	23.542	22.1187	16.3049	19.7375
220	20.7882	18.3312	17.804	19.7484	17.4518	24.2708	22.7802	17.0555	19.665
230	20.7876	20.2376	18.675	21.0305	18.7208	23.5857	22.5277	17.2579	20.7239
240	21.2296	20.6196	19.4162	22.1872	20.1599	22.9004	22.305	18.7102	21.5724
250	21.6997		20.1217	22.9223	21.3309	22.3764	21.5048	18.6063	21.445
260	22.0711	21.7937	21.2371	23.4885	21.7136	21.6994	20.7426	19.5914	21.5339
270	22.0307	22.351	21.9247	23.6153	22.5008	21.3627	20.0172	20.0472	22.0099
280	21.7395	22.5393	22.3306	23.5741	21.9747	20.2667	19.5357	20.2796
290	21.6037	22.8195	22.6426	23.7001	21.5137	20.6674	19.2946	20.6544
300	21.8252		23.0721	23.995	21.6561	19.8295	19.2232	20.7343
310	21.9389	22.5483	23.0277	23.5834	21.4414	19.7592	18.9115	21.236
320		22.7903	23.3629	23.929	20.9317		19.1426	21.1485
330	22.2753		23.4058	24.2786	20.5155	20.3219	19.2716	20.9899
340		22.6911		24.5421	20.4714	20.9671	19.6415	21.2807
350					20.7513	21.4656	19.7657	21.4147
360		23.1774			20.7801	21.5822	20.5777	21.6329
370		23.209			20.8487	21.3747	20.8237	22.2013
380		23.2232			20.3506	21.4687	21.5295	22.267
390		23.6472			20.1692	20.4392	21.3624	22.6079
400		23.5349			20.4502	21.178	21.2177	22.9393
410					20.8062	21.0727	21.6529	22.6136
420					20.7445	21.1077	21.6394	22.798
430						21.3905	21.3265	23.2262
440						20.699	21.2928	23.2428
450						20.7973	21.122

## Sheet: Pole_Dist_hcp-12
time from nebd (s)	embryo_1	embryo_2	embryo_3	embryo_4	embryo_5	embryo_6	embryo_7	embryo_8	embryo_9	embryo_10	embryo_11	embryo_12	embryo_13	embryo_14	embryo_15	embryo_16	embryo_17	embryo_18	embryo_19	embryo_20
0	9.73339	7.68531	8.64681	11.8325	9.73533			8.53579	11.5766			11.3962	0	11.5189	10.5027	8.16219		10.7234	10.3979	7.12101
10	9.81746	7.81346	9.41786	11.651	10.2795			8.50213	11.6066			11.4764	9.01421	11.7138	10.9428	7.8147		11.0079	10.4473	0
20	10.028	8.05687	10.0249	11.9251	10.8015			8.7577	11.8841			11.5176	9.81748	11.727	11.1223	7.83593		10.9696	10.4902	9.3223
30	10.1003	8.24827	10.6439	12.1843	11.336			8.96151	11.8732			11.464	10.0267	12.2419	11.429	7.80512		10.7224	10.3741	10.2973
40	10.2773	9.1408	10.2936	12.0576	11.7092	8.39444		8.93315	11.794	7.35889		11.6624	10.0152	12.8404	11.7982	7.34847		10.5897	10.4886	10.9283
50	10.4183	9.17778	11.2559	12.1792	11.7586	8.82298		8.95314	12.0124	8.40943		11.4579	11.4819	13.1934	12.0026	8.4513		10.4966	10.3351	11.5388
60	10.7246	9.4283	11.4998	12.0459	12.1514	9.69828		9.44912	12.0491	9.15749		11.6896	11.5134	13.35	12.1396	8.73251		10.4521	10.5666	11.9226
70	10.8701	9.74598	12.3898	12.6666	12.2609	9.92309		9.66756	12.4669	9.44276		11.7016	12.4093	12.925	13.2715	8.73411		10.7765	10.5342	12.6344
80	11.2153	10.5544	12.7729	12.5847	12.9108	10.2718		10.0959	13.0695	9.38447		12.2068	13.1316	13.2955	13.0757	9.34035		10.7701	10.6979	12.8578
90	11.626	11.914	14.0662	12.9343	12.894	11.0457		10.0407	13.495	10.0732		12.8501	14.1448	13.7445	14.1896	11.0665		10.8414	11.3861	13.1209
100	12.4306	13.1154	15.2753	12.9324	13.1436	12.2125		10.9182	14.7738	10.3945		14.1059	15.2459	14.4276	14.4565	14.2582		11.4462	11.8108	14.2376
110	12.9502	14.8655	16.2786	13.9055	14.9171	13.2927		11.5191	16.067	11.6878		13.8264	17.5726	15.3483	15.5502	15.9877		11.914	11.9461	14.6575
120	13.8799	16.2764	18.2629	14.6951	15.8293	15.6983		13.3825	17.5386	12.5915		15.8642	18.9567	16.7493	17.1555	19.0257		12.8551	13.525	15.8379
130	14.0331	17.6426	19.8851	15.9003	18.2035	17.0508		13.5506	18.9659	14.1522		18.2938	20.6828	18.3859	18.5265	20.9898		13.7651	13.9129	16.4382
140	15.3122	18.8533	21.5266	18.3171	19.6744	18.911	6.35836	14.3353	21.0257	15.4505		21.4494	21.4614	20.0321	19.9262	23.1805		17.3968	15.4564	18.6065
150	17.0099	20.3523	22.0536	19.576	21.0779	20.3995	9.59793	15.8364	22.0519	17.3767		21.931	21.1324	21.6512	21.6504	22.8345		19.6562	16.7125	19.084
160	18.4039	20.4773	23.3894	20.5144	21.9175	20.4057	14.5618	17.8112	22.3263	19.0221		21.6177	22.0477	21.4488	22.3451	24.0123		20.5856	18.3486	19.9146
170	19.7485	21.2453	24.0878	20.3057	22.0815	21.1765	17.8536	19.3239	22.9559	20.8841		21.8245	22.1432	22.76	22.9716	21.2834		22.301	19.5151	21.1947
180	20.231	21.2878	22.9622	20.8118	21.9521	19.9648	20.5858	20.8363	22.5519	20.9341		21.6825	21.5242	23.8575	23.0749	21.9761	16.0376	21.1598	20.2561	22.0588
190	20.4551	21.5095	22.3909	20.9132	23.0744	21.4949	21.9914	22.3603	22.389	20.7619		20.8947	21.3244	23.5624	23.6716	21.7338	19.3512	22.2218	21.3623	22.4695
200	20.9294	22.1539	23.5549	20.4173	22.8038	21.938	22.505	23.0922	23.0897	21.4921		21.9676	21.1839	23.0391	23.8521	21.8354	17.8176	22.0897	21.4175	22.2799
210	20.501	22.1422	22.8119	19.9793	24.3739	23.0609	21.7975	23.0206	23.2581	21.052		22.264	22.1161	23.0396	23.7328	22.2366	0	21.4295	20.8586	22.6919
220	19.5357	23.0411	23.1206	20.358	22.7639	22.3028	22.311	22.9349	22.1415	21.7032		22.8671	22.1238	23.0832	23.7761	22.5751	0	22.0763	20.7865	22.766
230	20.0751	21.6065	22.152	20.312	24.3823	21.5285	22.6603	23.9795	22.6816	20.7739		22.2767	23.343	23.1708	0	19.9769	17.8705	21.4415	21.6507	24.3005
240	20.0246	22.6879	22.8655	0	21.7184	21.6996	22.9362	23.3507	22.8247	21.3989		21.1346	23.6213	22.5949	22.532	22.1338	0	22.4606	22.1832	22.9064
250	20.668	21.7497	23.6029	21.5129	24.1813	21.9917	22.5993	22.076	23.1876	20.569		21.8878	22.4147	0	23.2427	22.2059	0	22.2415	22.2733	24.2138
260	20.6696	22.4398	22.9284	21.7313	22.4825	21.5927	22.4072	21.9158	22.7755	22.0296			22.2826	23.0185	23.0308	22.1371	0	22.3347	22.178	24.2455
270	20.2705	21.8433	24.1027	21.031	22.5132	21.4671	22.5819	22.2084	23.4623	21.6001			21.3341	23.9953	23.2812	22.8242	0	22.4054	21.6335	24.0218
280	20.5874	22.4118	23.4326	20.5984	22.4356	21.0363	22.4482	21.5951	23.3026	22.0003			22.4627	23.7144	23.7632	21.9376	20.4705	22.2596	22.0266	23.336
290	20.9069	21.7807	23.5273	21.2987	23.2666	21.3539	22.4291	21.4529	22.4632	21.4969			22.6233	22.7202	23.4588	22.4663	0	22.1877	21.5405	23.7385
300	21.4462	22.6304	23.2175	21.2073	23.2905	20.6708	22.2897	0	21.9941	21.883			22.0721	22.1275	24.045	23.0373	21.1448	22.5623	22.1003	22.9387
310	21.3832	22.3948	23.7131	21.6976	22.8723	20.2153	22.2575	21.4381	22.426	22.067			22.4154	23.1435	23.7943	22.5358	0	22.6023	20.5997	23.1957
320	21.5719	22.0368	23.1489	21.6858	23.2753	21.0324	22.8918	21.047	22.6741	22.7771			22.645	22.9979	23.5221	23.0914	3.22666	22.1411	21.433	23.8191
330	21.84	22.8475	23.6362	22.2111	23.2003	21.8915	22.7043	21.3046	23.0037	22.9848				22.9471	23.4264	23.2588	0	22.3112	21.8782	23.6727
340	22.048	23.0727	23.6629	22.6402	23.3106	21.8823	23.1513	22.3985	23.3269	22.9252				23.0847	23.4135	23.51	0	22.5166	22.3664	23.8249
350		23.136		22.609	23.7591	22.3261	23.1401	22.3222	23.149	22.4517				23.6255	23.7203	23.4764	22.4259	22.8007	22.0762	23.7201
360		23.3232		22.3402	23.8831	22.5562	23.1608		23.4941	22.579				23.2555	24.1561	23.6544	0	23.1886	21.9054	24.2425
370		23.8514		5.7356	24.009		23.2899		23.7241	22.7027				23.1676		23.6145	0		22.388	23.9643
380		24.2549		6.86849	24.2287				23.7226	22.9731				23.2873		23.4082	0		22.6933	24.1776
390		24.4011		22.3905	24.5403				23.9229	22.9785				23.3409		23.5622	0		23.6536	24.2893
400		24.3934		22.2755					4.82076	23.2452				23.512		25.0913	0
410		24.502							3.01498	23.5458				4.81148			4.1438
420									24.4706	23.4063				23.1953			4.45013
430									1.96253					23.3399			0
440
450
