# Supplementary material for: BUB-1 promotes amphitelic chromosome biorientation via multiple activities at the kinetochore
Source: eLife journal article supplement (doi:10.7554/elife.40690), 2018-12-14
Supplement: supp [file elife-40690-supp-v1.zip › elife_poa_e40690_Figure_5_figure_supplement_2_source_data_1.xlsx]

## Sheet: Control
time from nebd (s)	embryo_1	embryo_2	embryo_3	embryo_4	embryo_5	embryo_6	embryo_7	embryo_8	embryo_9	embryo_10	embryo_11	embryo_12	embryo_13	embryo_14	embryo_15
0	-9.58147	-2.29421	-21.0176	4.12611	2.61787	11.6061	12.4108	-6.40628	-10.8605	-10.9583
10	-5.98738	6.00489	-13.2058	15.8158	11.7514	13.0415	20.1886	1.07517	-3.43414	-2.99687
20	-1.16843	13.8799	-3.08947	19.0649	25.4167	17.1594	29.6796	7.65169	6.21994	4.73173
30	0.740176	15.4423	7.17331	25.5117	34.1378	19.8247	34.8168	10.8352	14.5686	17.1283
40	7.9789	19.4495	13.371	22.6269	39.6401	17.5292	36.1846	14.6239	20.3516	23.2051
50	13.847	16.8251	15.4266	23.2258	32.847	16.1015	32.9808	17.5862	22.9463	26.0061
60	11.4052	15.1682	23.3301	19.1476	31.0919	19.605	34.3603	17.5654	25.4332	22.3335
70	13.3743	18.3574	21.0214	25.6885	26.9097	19.5251	31.9378	20.2338	24.6905	23.7267
80	14.5963	21.6762	21.3251	24.8725	29.4269	28.6265	27.567	20.0854	31.4503	26.7714
90	14.5195	26.4404	23.7723	31.1834	31.1415	33.144	34.3672	21.6034	29.2439	19.6543
100	14.9366	38.0826	22.3406	31.0556	38.8138	42.4723	38.8444	27.3613	34.9451	26.8315
110	22.0165	50.9602	30.8025	36.1433	51.4847	48.6416	49.3138	33.1925	33.8809	25.245
120	22.1501	63.3382	39.9734	54.0741	62.8499	60.3955	66.4094	29.1102	46.7614	38.1282
130	26.2102	72.9676	54.7835	45.9329	69.6159	40.0146	66.3599	48.5553	61.7795	48.5252
140	37.0097	67.0906	66.4814	40.0251	63.7869	22.7034	85.4818	52.6166	64.7203	51.7661
150	41.2461	51.3825	71.8996	22.9724	40.5608	13.8748	33.2118	39.7051	56.0519	66.7335
160	60.0037	26.7007	59.767	14.4811	32.4522	6.31756	29.9698	31.1098	44.978	62.8067
170	42.1448	15.7516	35.7216	6.85814	17.668	-0.740911	17.2045	11.4657	23.5899	23.8297
180	11.6598	3.92129	7.86977	4.11978	12.5641	-0.563187	10.0053	3.44936	16.3063	16.4908
190	3.58106	5.01277	0.966328	1.50212	9.72451	-4.31786	8.36486	2.54877	8.3011	4.37641
200	-3.94582	-0.419442	-1.55546	0.0999039	6.26533	-3.62409	9.32823	-1.23297	5.41465	0.182348
210	-7.22502	-1.27668	-4.84134	-1.0654	5.64908	-6.24562	9.40057	-1.58786	4.75573	-1.11464
220	-6.55502	-0.937084	-7.5732	-2.21303	3.5044	-7.23976	5.45034	-5.3196	2.78069	-0.796024
230	-9.5676	-2.01189	-5.22233	-4.79778	2.9956	-8.52486	6.00797	-3.22216	1.52691	-3.73756
240	-6.98917	-5.49405	-8.56135	-4.5745	3.28834	-8.5705	3.6998	-3.21738	1.15173	-2.6655
250	-8.17697	-5.7352	-11.4519	-4.87435		-4.90802	4.8436	-4.87822	-3.26464	-3.21906
260	-8.81442	-5.46633	-13.327	-6.85987		-4.66365	2.72958	-3.90015	-2.32788	-3.96699
270	-9.51356	-4.71736	-12.0688	-6.63978		-4.07682	3.89582	-4.62542	-1.35626	-3.49119
280	-9.74216		-14.4677	-7.82367			2.11453	-4.74919		-4.37782
290	-8.79903		-11.3984	-4.88486				-1.64181		-5.89638
300			-8.02972	-0.650074						-5.40045
310
320
330
340
350
360
370
380
390
400
410
420
430
440
450
460
470
480
490
500
510
520

## Sheet: bub-1
time from nebd (s)	embryo_1	embryo_2	embryo_3	embryo_4	embryo_5	embryo_6	embryo_7	embryo_8	embryo_9	embryo_10	embryo_11	embryo_12	embryo_13	embryo_14	embryo_15
0	10.0595	5.90355	-2.77172	11.6725	6.98855	1.82055	-0.234235	-6.48313	-7.9872	-15.2165	2.363
10	19.2135	3.68713	2.12573	13.4274	18.1797	14.128	0.854926	6.53193	-3.6805	-9.32179	6.02248
20	21.4421	8.53677	1.8619	17.3087	28.8995	23.014	1.34754	11.8828	-5.59952	-2.35196	9.82315
30	20.1073	4.9853	6.17894	15.3596	33.382	24.2086	4.71668	14.159	5.89469	5.2179	14.8317
40	24.8254	2.09337	7.17458	12.129	37.1752	26.9642	1.66325	13.9394	9.90787	6.99969	23.37
50	19.9312	3.55323	8.98448	15.9282	34.7541	31.4102	4.6298	15.8566	14.7023	9.58648	19.2855
60	17.1934	4.44988	10.8452	13.3366	41.7322	30.0614	2.81441	9.28796	19.457	9.71269	24.2933
70	11.842	8.66352	11.8026	11.9278	35.4955	26.9042	3.41888	10.303	21.0773	9.86805	19.8544
80	12.5237	10.8818	8.98653	11.288	36.6225	26.2726	5.20451	13.9221	26.0084	10.9657	17.835
90	11.6288	14.8311	11.3281	18.837	35.3039	26.1574	10.9757	9.70627	29.4042	8.3883	17.3686
100	20.6714	21.6344	14.3214	22.0983	28.481	33.5243	15.4708	12.3918	32.2742	9.84234	18.9081
110	20.8453	30.5763	13.0037	27.1874	31.7518	29.4902	16.9208	16.9539	37.6031	11.2639	17.9664
120	28.4117	37.2064	14.7598	38.5268	36.7454	39.6395	25.9642	20.7053	35.6338	17.6678	27.6179
130	36.0964	39.4525	18.6127	45.9664	40.4655	48.1012	33.4684	25.0665	36.9863	21.813	28.7235
140	50.0006	35.2116	24.6328	45.129	46.7101	38.2163	42.2441	28.6806	40.575	24.1488	26.1842
150	54.918	34.6208	25.471	48.6356	51.289	50.5465	46.4312	37.3807	42.6037	34.5904	33.3725
160	66.8304	48.9662	33.8599	61.6465	59.8906	49.1451	48.6648	44.9246	48.3781	35.6614	30.7145
170	77.2291	51.3473	31.4141	68.1509	56.4869	52.3794	56.4988	52.6661	57.5857	43.673	56.3471
180	87.9856	74.0378	41.724	77.9212	66.3767	53.8833	54.289	54.8657	55.9397	51.1456	37.7888
190	79.9875	53.1871	31.4416	76.5704	52.8332	51.3522	59.5915	65.4029	76.0332	53.1991	49.1754
200	77.0939	52.7575	52.7004	85.5619	72.1745	65.6545	56.0144	68.1881	71.3763	59.2171	45.1217
210	78.3493	30.3963	39.047	92.661	61.2186	56.9586	49.7454	70.6742	77.7308	45.5374	56.608
220	61.3599	31.9032	46.0135	71.5579	81.3668	58.9669	41.137	77.8976	91.333	70.7788	66.3566
230	56.0185	19.7074	42.4329	45.7305	42.3369	63.7164	22.4119	76.4642	96.1668	57.5746	60.0416
240	45.5744	23.8296	60.6284	50.6644	44.8243	40.1472	20.662	73.5524	89.5891	49.4118	56.1108
250	41.8496	6.98632	42.0619	34.4798	24.9789	51.6142	5.30376	70.545	116.795	81.6349	48.7638
260	28.7899	9.41676	83.3617	27.0554	32.5006	30.6554	10.5124	62.657	86.0057	38.4128	53.7205
270	25.5139	5.67976	38.2055	27.3495	20.7215	25.1209	0.761912	51.0411	101.337	57.5933	35.4013
280	13.387	4.5466	36.7902	22.19	24.0909	19.7103	-0.682348	34.5606	46.2615	67.6478	32.3566
290	9.00564	0.0470748	31.0796	17.5882	14.7997	14.2106	-1.16601	31.288	61.5727	19.6077	21.8571
300	8.96281	0.319801	11.1316	13.9038	15.8552	11.1489	-2.11049	20.3113	32.1125	17.5692	20.0355
310	8.64661	-1.07716	7.63563	13.0056	16.2971	6.19371	-2.45079	18.6651	34.963	14.5573	17.416
320	9.423	-2.73219	-0.696803	10.2247	12.1163	4.13493	-3.60076	14.1578	20.0365	5.05846	15.2214
330	6.68949	-1.68808	0.865728	7.30492	13.5559	1.82689	-4.33618	13.7323	18.1068	6.12304	15.4483
340	6.0255	-2.00441	-3.65475	8.13283	12.0111	2.84721	-3.15298	13.9922	14.7692	1.54899	12.4778
350	5.54037	-0.824856		8.21911	13.0104	0.340525	-2.57568	11.3086	14.4846	0.635171	11.8045
360	3.65946	-0.303193		5.16612		-1.87345	-2.85134	8.55845	14.7895	0.472527	12.9556
370	1.40722			2.18822		-2.69531	-2.00621	7.57165	12.4083	-2.72175	12.7136
380	1.76533			0.523425		-4.60877	-4.07757	4.5848	9.86726	-2.91827	10.1001
390	1.17975			-0.0352331		-5.47096	-0.725055	7.51527	10.1818	-2.8769
400
410
420
430
440
450
460
470
480
490
500
510
520

## Sheet: hcp-1
time from nebd (s)	embryo_1	embryo_2	embryo_3	embryo_4	embryo_5	embryo_6	embryo_7	embryo_8	embryo_9	embryo_10	embryo_11	embryo_12	embryo_13	embryo_14	embryo_15
0	-44.5368	8.56924	-4.75699	1.12808	-6.60951	-8.49961	-23.4528	6.6953	-17.867
10	-30.434	16.2342	-2.51513	4.83585	-8.96453	-2.88106	-21.5278	17.7552	-5.92911
20	-17.138	22.042	2.39916	3.47561	-3.25146	2.3729	-14.6568	28.0871	0.910574
30	4.31129	25.1331	5.86445	7.84738	5.14635	8.83168	-10.1976	35.7583	0.689233
40	21.8113	27.3702	7.35541	5.02036	12.6098	4.81352	0.925029	25.7888	-0.913489
50	34.7071	31.3942	10.5065	5.72594	9.64732	3.52752	19.7326	31.6602	-2.759
60	42.0469	23.3986	12.1347	0.0259491	9.43024	4.19938	29.1509	23.1976	-2.19668
70	38.804	17.2387	12.5867	-1.55076	8.50544	6.43143	34.9721	25.577	-1.29888
80	36.2215	17.0453	15.6601	-1.70566	4.72188	4.27003	39.743	18.5596	-2.98824
90	31.4922	13.7813	9.40546	-5.22572	1.3288	1.28582	38.469	14.7874	-1.1463
100	30.1458	15.6447	13.8647	-5.73308	1.51163	2.93823	30.896	11.9789	-1.06889
110	28.1737	9.92343	11.1116	-9.77826	-1.57684	2.80526	23.5326	11.3365	-4.038
120	26.4172	6.20485	9.97312	-5.92828	-4.00567	1.91405	16.299	10.612	-9.1297
130	20.7288	12.1382	5.11493	-7.20752	-4.08286	0.02891	17.7351	7.38281	-11.8035
140	14.0996	11.5377	5.1856	-7.5845	-4.22709	-1.15939	8.47862	11.1161	-9.51716
150	18.9867	10.9626	4.9684	-8.56125	2.24237	2.49704	9.52545	10.8684	-6.33042
160	17.4108	7.87893	3.66247	-7.41558	1.54163	1.72303	10.2859	5.23456	-7.25165
170	10.954	7.65344	8.15198	-8.10562	-2.99142	-0.277072	9.28237	8.84687	-8.216
180	9.51522	10.1819	6.90392	-5.68304	1.85117	1.79095	1.48926	6.12543	-9.99522
190	6.84774	10.9569	2.07969	-6.7874	-4.6258	-0.483508	8.18132	6.98961	-3.61268
200	7.21463	13.7946	-0.240361	-7.71818	-3.27293	2.00924	7.40829	12.866	-4.28435
210	9.22943	10.1208	-0.0488794	-8.89249	-2.93828	3.7165	5.6375	5.11601	-4.56247
220	20.1727	5.5186	2.58664	-11.6259	1.97737	3.38245	-2.71748	8.36179	-3.14873
230	7.56145	11.3678	2.35956	-10.4986	-1.28	5.34076	4.5634	7.01224	-1.55357
240	5.95584	5.42888	4.7535		-6.77218	4.30785	-3.18576	9.95083	-5.58606
250	10.9234		5.79738		-3.98313	2.12423	1.9112	8.30893	-5.82102
260	14.0677				-5.67365	3.91657	5.89997	4.48134	-1.34371
270	6.7494				-3.6948	2.13579	7.4094	1.74649	-0.340806
280	3.81842				-10.2651	2.44925	5.03264	-2.97801	-0.450251
290					-8.61138	1.04711	5.72124	0.701412	0.144671
300						-0.347024		-1.24049	-2.18926
310
320
330
340
350
360
370
380
390
400
410
420
430
440
450
460
470
480
490
500
510
520

## Sheet: bub-1+hcp-1
time from nebd (s)	embryo_1	embryo_2	embryo_3	embryo_4	embryo_5	embryo_6	embryo_7	embryo_8	embryo_9	embryo_10	embryo_11	embryo_12	embryo_13	embryo_14	embryo_15
0	-0.773514	34.6591	20.3224	5.60642	1.52221	11.8613	3.57618	1.45507	-8.01527	8.12212	6.19898	2.52629	4.31078
10	10.2303	37.211	17.5415	12.2164	8.32871	17.9256	10.3746	12.5087	-0.456668	17.3933	5.57992	8.11055	13.1899
20	10.7081	43.096	17.0578	20.0283	11.5979	23.8811	8.25395	17.4234	11.1997	22.1568	5.79883	9.33862	11.7816
30	16.1678	56.2671	20.1918	20.2397	14.7858	24.8167	20.2124	13.7346	16.6266	30.6767	4.84305	8.13093	18.9067
40	11.9172	42.7164	14.2122	21.353	15.2656	22.0716	27.3013	19.4829	21.2799	26.4544	2.76283	10.8712	11.3307
50	14.0104	41.4615	10.9695	25.9211	18.0369	26.3366	29.1809	16.3299	20.0574	29.2641	7.87577	11.5785	8.8162
60	15.1262	40.7683	16.3217	25.3316	14.5197	20.9493	38.6317	20.5242	18.865	26.8786	4.38087	6.38756	10.1901
70	12.759	42.0198	11.5889	18.709	16.1505	21.2604	39.392	16.8271	18.4927	30.3649	9.26236	8.69096	9.2262
80	13.2654	37.0257	11.457	8.15318	19.9352	23.0361	46.5238	18.6007	20.0805	35.6678	19.3889	9.96206	6.57641
90	18.5364	36.9894	18.1144	9.05993	13.4062	21.3102	35.6658	16.1693	23.0924	27.491	25.5755	14.3143	10.1717
100	22.6351	36.5135	24.0653	12.2319	12.7267	19.3373	35.3837	20.7224	15.7427	26.1324	18.1776	18.1807	10.1329
110	29.9913	39.0101	34.8735	12.8515	15.4987	22.0922	38.0181	24.0768	15.9865	31.2418	27.1046	21.0414	11.3054
120	30.3607	32.2315	34.3248	19.1324	18.093	28.0312	35.2848	25.1737	22.1005	38.0611	37.2778	26.2822	14.2058
130	29.7837	49.8856	41.5465	27.2382	18.6512	37.741	40.9037	34.3994	28.0316	40.1781	38.2193	29.6479	14.7518
140	45.6898	58.9872	55.3959	42.8896	18.3363	42.9164	41.3239	28.8669	34.9792	47.0041	36.6672	32.1029	25.1586
150	51.9403	55.0679	57.6924	53.7899	27.0947	49.4303	41.3169	25.4576	48.6315	74.1102	39.6866	29.8334	26.8488
160	64.979	71.9427	72.5176	47.078	36.5327	62.6676	49.5769	33.1838	51.4872	64.7428	32.5664	37.256	23.8629
170	70.3165	74.9273	79.2463	65.3631	35.6596	54.9376	55.6061	21.7461	60.8	77.8007	40.1741	44.6784	25.4551
180	72.9997	67.3635	64.0247	70.8129	50.7303	66.0003	67.345	38.4642	63.1172	82.5604	36.3402	36.9492	21.7504
190	70.6974	63.9915	78.7252	77.4422	42.2212	56.6626	74.4776	39.5215	81.4974	80.5485	26.251	70.4358	29.7069
200	76.8275	68.3266	64.8087	60.6371	53.8797	45.2294	83.9579	36.9791	92.5132	112.418	20.8137	46.028	42.6756
210	90.6012	85.4166	61.8637	61.7896	43.6439	37.6607	86.6945	25.4266	93.2618	54.5271	21.1509	39.2874	30.2235
220	72.7067	64.069	45.5385	47.4209	47.9752	53.3884	94.5926	27.1434	97.6972	115.116	23.217	21.1506	34.0022
230	65.0257	71.8473	43.6868	52.9644	37.7926	26.8555	67.9302	12.937	64.5987	70.4393	12.2302	23.3268	25.5456
240	57.058	41.7019	31.3442	30.7301	35.7626	28.0101	92.3412	12.3407	75.745	62.7572	18.4912	15.6935	26.0962
250	28.8711	37.8459	23.2144	39.5866	20.1062	20.0688	65.9052	2.92444	54.3614	81.59	18.7052	8.63881	15.028
260	31.4457	32.4439	13.5587	16.391	12.3551	15.7025	48.7713	-4.75999	43.982	49.5876	12.7209	8.12469	13.3545
270	29.6776	26.7652	1.12574	18.329	11.5114	14.9898	46.6552	-4.54255	39.074	51.0926	10.5758	8.5119	9.63286
280	19.2283	29.8569	-2.45933	7.71929	7.94781	13.6716	38.0191	-9.02341	25.4616	37.5501	8.43991	4.94201	7.14636
290	18.7161	24.6335	-2.8777	6.40298	4.66536	7.41012	37.873	-7.08636	30.2724	45.9634	8.62736	3.20431	8.44383
300	13.8144	24.1092	-3.84773	2.32769	7.4753	11.3413	21.8205	-9.57151	18.916	35.6612	6.60412	3.30423	7.38266
310	10.5811		-2.18063	2.57018	1.9526	4.762	19.7742	-8.54148	17.7445	33.9678	5.12244	5.13514
320	9.07251		-4.15661	0.0535583	3.1912	3.04976	18.9532	-9.91259	9.74265	27.3655	2.08767	5.40403
330	6.06811		-6.00673	-2.75213	5.95552	-1.11195	14.3379	-11.4449	10.4724	17.913	2.69917	3.67445
340	5.94227		-6.41796	-5.41076	4.11731	-0.643857	16.6336	-11.3412	9.27792	20.0448	0.878255	3.43666
350	4.23694		-2.75277	-4.70443	4.82653	-2.36173	17.6317	-12.7755	7.16593	14.9645	-0.136074	2.97464
360	4.80262		-4.91047	-4.7895	2.89015	-2.45003	15.3011	-9.97951	5.78067	11.4644	0.127283
370			-2.69765	-8.68707	1.80518		15.6937	-13.21	2.1303	11.7552
380			-5.872	-8.32889	0.462817		14.9713		0.500447	11.3259
390			-6.42844	-4.13469	0.31509		13.9819		-0.647108
400			-3.88114	-1.90838	0.661566		10.2009		0.36031
410			-3.67025	-0.113125	-0.313692		7.43234		0.0303344
420			-1.30655		-0.265125		7.70285		-0.439467
430
440
450
460
470
480
490
500
510
520
