# Supplementary material for: BUB-1 promotes amphitelic chromosome biorientation via multiple activities at the kinetochore
Source: eLife journal article supplement (doi:10.7554/elife.40690), 2018-12-14
Supplement: supp [file elife-40690-supp-v1.zip › elife_poa_e40690_Figure_5_figure_supplement_2_source_data_2.xlsx]

## Sheet: data
pixel	SKA1	H2B
0	0.0668324	0
1	0.0988646	0.0131197
2	0	0.0454362
3	0.0604972	0.16504
4	0.0108834	0.0182846
5	0.0500771	0.0486035
6	0.077295	0.0807227
7	0.0823914	0.0253516
8	0.0983691	0.0419013
9	0.167913	0.0430586
10	0.156463	0.031784
11	0.142039	0.0316197
12	0.166223	0.0379719
13	0.183389	0.0336533
14	0.297007	0.042673
15	0.265504	0.0423322
16	0.319437	0.0891173
17	0.288468	0.0613701
18	0.226031	0.0304711
19	0.296536	0.0239429
20	0.333072	0.0335306
21	0.417204	0.0392367
22	0.30504	0.0524611
23	0.339578	0.0891442
24	0.33727	0.0476046
25	0.376826	0.0626441
26	0.354809	0.0812161
27	0.297194	0.0619983
28	0.301976	0.0674112
29	0.318677	0.0733326
30	0.372799	0.0709999
31	0.334728	0.0319937
32	0.347225	0.045194
33	0.372352	0.0581226
34	0.401073	0.0528828
35	0.407311	0.065916
36	0.409197	0.0886327
37	0.410325	0.0955021
38	0.368482	0.145266
39	0.334599	0.114807
40	0.384092	0.164421
41	0.4375	0.22144
42	0.461044	0.186145
43	0.490313	0.281243
44	0.431993	0.224529
45	0.448201	0.221487
46	0.435204	0.232391
47	0.506921	0.25561
48	0.682981	0.19157
49	0.953092	0.298454
50	1	0.531105
51	0.780782	0.851427
52	0.466312	1
53	0.286252	0.816087
54	0.281648	0.456926
55	0.3056	0.178127
56	0.295762	0.157091
57	0.295206	0.1475
58	0.228068	0.153368
59	0.207197	0.114283
60	0.236542	0.105491
61	0.208381	0.0438904
62	0.235491	0.0219991
63	0.224577	0.0134669
64	0.207419	0.0529369
65	0.252383	0.0451583
66	0.224597	0.053448
67	0.202157	0.0647827
68	0.169577	0.0532989
69	0.135705	0.0404778
70	0.16325	0.0292213
71	0.190635	0.00328678
72	0.198974	0.0337548
73	0.239602	0.0462976
74	0.239292	0.0175818
75	0.223223	0.00173735
76	0.240716	0.0335278
77	0.269743	0.0692207
78	0.262479	0.0673007
79	0.222659	0.0748041
80	0.194518	0.0651744
81	0.232191	0.0714187
82	0.192226	0.0504006
83	0.20882	0.0308031
84	0.20181	0.0318618
85	0.225755	0.0171361
86	0.25398	0.0621149
87	0.19109	0.0594772
88	0.176155	0.00881643
89	0.173235	0.0177042
90	0.165185	0.0716969
91	0.14766	0.0598392
92	0.158643	0.00804188
93	0.150273	0.00652578
94	0.0933998	0.0192956
95	0.0867562	0.0207368
96	0.161026	0.0227644
97	0.23961	0.0420689
98	0.238418	0.058655
