# Supplementary material for: BUB-1 promotes amphitelic chromosome biorientation via multiple activities at the kinetochore
Source: eLife journal article supplement (doi:10.7554/elife.40690), 2018-12-14
Supplement: supp [file elife-40690-supp-v1.zip › elife_poa_e40690_Figure_5_figure_supplement_2_source_data_3.xlsx]

## Sheet: Chr_Span_DeltaHCP2
time from NEBD (s)	embryo_1	embryo_2	embryo_3	embryo_4	embryo_5	embryo_6	embryo_7	embryo_8	embryo_9	embryo_10	embryo_11	embryo_12	embryo_13	embryo_14	embryo_15	embryo_16	embryo_17	embryo_18
0	7.11432	8.02073	9.06795	6.06047	7.47863	6.89081	6.67885	8.33568	6.63761		7.5891	8.00064
10	7.87201	7.22329	9.57714	5.6015	7.07991	6.86026	6.56047	7.40491	6.04231		7.21902	7.78825
20	5.93056	6.62436	7.90171	4.21859	7.26539	6.26539	5.60748	7.26987	5.53333	7.19509	6.37051	4.71325
30	5.93397	4.88611	6.78739	4.78526	5.70919	6.01709	4.61731	6.67543	6.33889	6.48739	5.89487	4.02201
40	2.96709	4.28825	6.66218	4.2047	5.08547	6.91774	3.6032	6.64487	5.57714	7.26816	4.65085	3.82543
50	3.91816	5.13312	6.05214	4.43034	3.63526	6.2859	3.54017	7.44637	5.20833	6.66367	4.65577	3.94188
60	3.20192	3.41368	5.63803	2.86325	3.69402	5.10641	2.93419	7.16367	4.01923	5.98461	4.49679	4.18248
70	3.17735	2.45278	5.67308	3.03269	2.62756	4.71603	3.35961	5.81261	4.5391	4.27479	3.2515	2.93846
80	2.92244	2.74103	3.98483	2.72991	3.23974	3.8547	2.36774	4.48953	4.01603	3.49295	2.33312	2.46068
90	2.52137	2.52628	4.04551	2.9547	3.32009	3.26239	2.68611	3.94893	3.73782	4.21197	2.29359	3.01902
100	2.31923	2.09487	3.21859	2.59273	2.67735	3.00577	2.42821	3.65	2.67735	3.81303	2.80598	3.12073
110	2.37222	2.14274	2.93675	2.56816	2.19423	2.33312	2.35278	3.09231	2.77051	3.33013	2.13803	3.38611
120	2.42222	1.95962	2.48782	2.04081	2.01068	2.39423	2.1015	3.2515	2.45791	3.12906	2.07051	3.58184
130	2.26752	1.98675	2.26346	1.82564	2.05449	2.30128	2.11197	2.46944	2.19594	2.47244	2.77778	2.53333
140	2.32906	2.12479	2.20919	2.23547	2.1032	2.26346	2.1015	2.2297	2.08611	2.70748	2.96239	1.70449
150	1.82714	2.07415	2.11774	2.99573	3.1765	2.66966	2.75043	1.8641	2.08055	2.43419	2.59273	2.72073
160	1.91261	2.82222	2.19872	4.82073	4.66902	3.65	4.14637	3.65	2.31197	2.39423	2.93675	3.02564
170	3.44252	4.41474	3.64637	6.11581	5.74466	4.79124	4.73974	4.9985	3.36709	3.17329	4.28526	4.81026
180	5.02393	5.66624	4.74701	6.96496	6.60406	6.05406	6.05406	6.03226	4.41346	4.55171	5.84081	5.9641
190	6.21581	6.73376	6.07094	7.31581	7.41047	6.32265	6.59936	7.25278	5.57201	5.69124	7.39444	7.09722
200	7.94914	7.2594	6.74081	7.80791	8.18974	7.08718	7.2109	7.72564	6.67009	6.53568	8.06645	7.75299
210	7.59744	7.57607	7.40812	8.48056	8.67201	8.39765	7.23697	8.13654	6.9765	7.01496	8.87436	8.59338
220	8.23761	8.19872	8.01175	8.51496	9.02393	7.85556	8.35278	8.9032	7.6344	7.57329	8.8906	8.87308
230	8.7188	8.38397		8.92842	9.33483	8.50555	8.11624	9.47073	8.02073	7.77521	9.46026	9.40192
240	8.72735	9.34594		9.22329	9.55726	8.90427	8.60684	9.31752	8.27992	8.61346	9.92286	9.57286
250	9.3688	9.65769		9.89915	10.8348	8.77265	8.83654	9.44509	8.72479	8.53654	10.2893	10.013
260	9.64444	9.45983		10.3814	10.7049	9.41902	8.91453	9.98013	9.36624	8.89744	10.7707	11.1449
270	10.2613	9.83269		10.1412		10.0551		10.5066	9.32158	9.37137	10.5147	10.8284
280	10.1951	10.7103						10.8833	9.90128	9.86624	11.4423	10.8472
290									10.2686	9.75256
300										10.0085
310
320
330
340
350
360
370
380
390
400
410
420
430
440
450
460
470
480
490
500
510
520
530
540
550
560
570
580
590
600
610
620
630
640
650

## Sheet: Pole_Dist_DeltaHCP2
time from NEBD (s)	embryo_1	embryo_2	embryo_3	embryo_4	embryo_5	embryo_6	embryo_7	embryo_8	embryo_9	embryo_10	embryo_11	embryo_12	embryo_13	embryo_14	embryo_15	embryo_16	embryo_17	embryo_18
0	10.9112	10.7421	8.79917	11.2549	9.01376	8.51794	11.1962	7.50901	10.3455		11.7146	10.1151
10	10.9092	10.8896	10.3281	11.1679	10.3498	8.949	11.0146	7.82108	10.5376		11.8258	10.1819
20	10.951	11.0067	10.5462	11.2799	10.5593	9.06272	11.4662	7.83314	10.5969		12.1351	10.127
30	11.337	10.9616	10.7424	11.6104	11.9828	9.40483	11.2676	7.59917	10.7711		11.7766	10.0998
40	11.171	11.0492	10.8488	11.6981	10.8433	8.9029	11.2993	8.1935	11.0477		11.6711	9.86876
50	11.8994	11.704	11.6706	11.6808	11.5174	9.04769	11.4761	8.03762	11.0494		12.5943	10.1163
60	11.4428	11.5174	11.2384	11.872	12.0197	9.60008	11.4906	8.41257	10.5957		12.5638	10.0804
70	11.4064	11.5437	11.5564	11.9621	12.5905	9.81956	11.5183	9.13157	10.5656	8.44039	11.8085	10.3238
80	10.9783	11.6166	11.6583	12.0122	12.8899	10.3164	11.7237	9.95491	10.387	8.55804	11.8862	10.6929
90	11.3841	11.792	11.8346	12.2465	12.9642	11.0572	11.9882	11.1167	10.5956	9.28572	12.2051	11.1276
100	11.5029	12.243	11.882	12.6129	13.3758	11.7477	12.4178	11.4599	11.1905	10.2869	12.6905	11.884
110	11.9211	12.4325	12.2852	12.6699	13.6565	12.0454	12.6933	12.654	11.6644	11.6651	13.0944	12.3738
120	12.1324	12.7494	12.5955	13.1783	13.5816	12.5018	12.8936	13.0102	12.1437	12.2725	13.5671	12.6807
130	12.5125	12.8082	13.1449	13.8941	13.7918	12.5723	13.1697	13.706	12.6798	12.9163	13.7476	13.8105
140	12.8156	13.2069	13.4643	14.2055	13.9141	12.8654	13.3729	14.056	13.0027	13.0942	14.0196	14.2288
150	13.4239	13.2466	14.13	14.8946	14.9104	13.2287	13.9464	14.5087	13.4947	13.5407	14.2502	14.2509
160	13.6995	13.9142	14.2641	15.9605	15.2517	14.154	14.7117	15.5734	13.8848	13.7132	14.4673	15.4814
170	14.8861	14.5329	15.382	16.5963	16.5661	14.6923	15.1572	16.8259	14.6375	14.4235	16.1629	16.3124
180	15.6406	15.9395		16.9155	16.9643	15.176	15.996	17.2026	15.4737	15.3774	16.9797	17.1148
190	16.7958		17.4695	17.9628	18.0094	16.1589	15.6117	17.9543	16.4001	15.5048	17.8491	18.0829
200	16.759	17.4914		18.4342	18.5811	16.3691	16.5671	18.5111	16.8974	16.4748	18.5758	18.8758
210	17.8431			19.1152	19.1905	17.1677	16.6567	18.9017	17.197	17.2527	19.1883	19.2124
220	18.3741	18.5254		19.3917	19.5012	17.5667	17.7824	19.5384	18.4416	17.8717	19.5957	19.9835
230		18.5335		19.9688	20.0841	18.0463	18.4251	19.9945	18.5478	18.4107	20.1601	20.1558
240	19.5369	19.5759		19.9362	20.146	18.4087	18.8202	20.5918	19.184	19.0749	20.4114	20.4339
250				20.3132	20.3196	18.8957	19.171	20.6004	19.683	19.2418	20.9187	20.7733
260	20.3823			20.6859	20.2557	18.9303	19.1585	20.722	19.9867	19.505	21.1329	21.1263
270	20.4186			20.7441	20.5265	19.7819	19.4917	21.2155	19.7765	19.9832	20.888	21.1446
280				20.5864	20.2466	19.9595	19.682	21.1596		20.2664	21.7586	21.6021
290				21.1756	20.4264	20.0059	19.9069	21.629		20.2126	21.9576	21.8235
300				21.4187	20.5804	19.9234	20.633	21.4432		20.5442	22.4034
310				21.0467		20.8202	20.4689	21.3392		21.0393	22.609
320						20.9139		21.6941		20.868	21.9576
330										21.3637	22.4034
340						21.1485					22.609
350
360
370
380
390
400
410
420
430
440
450
460
470
480
490
500
510
520
530
540
550
560
570
580
590
600
610
620
630
640
650

## Sheet: Chr_Span_DeltaHCP2_SKA1
time from NEBD (s)	embryo_1	embryo_2	embryo_3	embryo_4	embryo_5	embryo_6	embryo_7	embryo_8	embryo_9	embryo_10	embryo_11	embryo_12	embryo_13	embryo_14	embryo_15	embryo_16	embryo_17	embryo_18
0	6.46	7.93	8.35	9.36		6.78	5.98
10	5.70513	7.48162	7.27094	8.85406		6.5406	5.59466	9.51987		8.48056
20	4.63462	6.05406	6.26816	6.24829	7.69701	6.60235	5.70192	8.3609		6.69551
30	4.7094	5.42991	5.22863	6.21133	6.18269	5.79722	4.8438	8.50449		6.06453
40	7.69359	5.36218	6.46731	7.65962	5.52585	4.58333	3.9406	6.75278		6.08098	4.20791
50	6.5562	5.85598	7.4782	6.44979	6.85791	6.74081	5.79722	5.32286		5.65556	5.06218
60	5.55748	4.60556	6.59658	4.75299	5.89658	6.99679	5.70385	6.4062		4.2735	6.11239
70	4.56346	5.55107	4.47308	6.65791	5.55278	5.35705	5.83397	6.08419		5.62714	4.5188
80	2.92372	6.31175	3.73226	6.38846	4.91111	3.39786	5.71453	4.56838		4.48953	4.84338
90	3.64359	6.55897	4.23056	4.47073	6.02393	4.56838	4.19017	5.17586		3.00492	2.84936
100	3.35064	6.8391	4.88547	3.51816	4.06303	3.40833	5.05897	5.61047		3.49295	3.6188
110	3.20833	3.79103	4.85171	3.99423	3.95812	3.66645	5.07244	5.39893		3.49295	4.04188
120	3.27714	4.10021	3.58461	3.79701	3.27735	4.62137	6.55043	3.79295		2.78141	2.58397
130	2.70662	4.05427	2.87115	3.1218	3.0406	2.83568	3.12414	3.33846		2.92799	4.36667
140	2.3547	3.66239	2.87115	2.74103	2.5562	2.9062	2.77414	2.93675		2.56816	2.90235
150	2.50919	3.31709	3.32543	2.96838	3.26859	2.1532	3.70449	2.63632		3.42244	3.50534
160	4.3453	3.46603	5.3891	4.33782	4.10769	2.89936	5.31709	3.57906		4.80598	6.95769
170	4.78056	5.20534	6.52051	5.38355	5.22137	4.51026	5.85598	4.01709		5.5797	6.8203
180	5.56688	6.15876	6.52991	5.98718	6.3406	6.02436	6.7032	5.09295		6.02051	7.32799
190	6.34893	6.37842	6.7032	7.11709	6.59637	6.32735	6.9765	5.77329		6.9703	7.98355
200	6.56239	7.15812	7.25299	7.45684	7.20128	7.12885	7.90726	6.27436		7.32372	8.01282
210	7.12244	7.03974	7.40876	7.64466	7.71944	7.51752	8.275	6.8562		7.98141	8.80128
220	7.50021	7.57607	8.47692	7.96325	8.02799	7.72201	8.66496	7.32927		7.97842	8.76474
230	7.93184	8.45449	8.76859	8.47671	8.72436	8.49017	8.86453	7.38825		8.87564	9.4359
240	8.4094	8.56282	9.78889	8.45449	8.70641	8.53654	9.5188	7.82115		9.11709	9.61773
250	8.3609	8.83654	9.78355	9.44594	9.21303	8.57842	9.53483	8.7765		9.94231	10.3235
260	8.64209	9.08932	9.64915	9.36517	9.5765	9.57842	9.82201	8.6359		10.4254	10.5626
270	8.7735	9.27842	10.5782	10.2925	9.96538	9.40876	10.4776	9.52286		10.5483	10.6893
280	9.55	9.58889	10.3306	10.8133	10.6506	9.65556	10.2239	8.75491		10.8788
290	9.94359	9.8203	10.6846	11.3419	10.8977	9.31496	10.6776	10.0551		11.5132
300	10.9835	10.3306	10.6776	11.4459	11.2729	10.2962	11.232	10.8406		11.4938
310
320
330
340
350
360
370
380
390
400
410
420
430
440
450
460
470
480
490
500
510
520
530
540
550
560
570
580
590
600
610
620
630
640
650

## Sheet: PoleDist_DeltaHCP2_SKA1
time from NEBD (s)	embryo_1	embryo_2	embryo_3	embryo_4	embryo_5	embryo_6	embryo_7	embryo_8	embryo_9	embryo_10	embryo_11	embryo_12	embryo_13	embryo_14	embryo_15	embryo_16	embryo_17	embryo_18
0	11.6648	10.273	11.8209	11.9137		11.0778	10.3565
10		10.2576	11.914	12.0166		11.4023	10.3969		9.5972	10.2541	11.0613
20	11.4126	10.4298	12.0824	12.402	8.68539	11.5455	10.1889	10.168	9.83994	10.985	11.805
30	11.6044	10.2475	12.1423	12.2281	9.1546	12.2636	10.7479	10.9915	10.1287	11.3325	11.7644
40	11.826	11.1393	13.0369	11.8946	10.0147	12.7138	10.773	11.8435	10.2002	11.6418	12.0115
50	12.1393	10.9381	12.6883	12.2208	10.6512	13.0922	11.1535	12.2703	10.3658	12.0157	11.8316
60	12.4814	10.854	12.8321	12.5953	10.3568	12.7765	11.4176	12.7189	10.6113	11.6827	11.7933
70	12.074	11.3702	12.1493	12.2485	11.0659	12.6013	11.4872	12.5802	11.2336	11.349	11.5176
80	12.2113	12.0691	12.2015	12.24	11.61	12.9685	12.1085	13.345	11.5377	11.3637	11.8366
90	12.5171	12.5204	11.8798	11.8097	12.3444	13.0954	12.6159	13.1184	11.857	11.7383	11.8571
100	12.5046	12.9459	12.1483	11.9135	12.5656	12.9952	12.5807	12.9738	12.1277	11.407	12.1097
110	12.6269	13.1694	12.2596	12.2477	12.9525	12.9304	13.2893	12.3687	12.7933	12.2202	12.2673
120	12.7525	13.7482	12.3245	12.4725	13.5723	13.1212	13.2885	12.6894	12.8504	12.8248	12.2864
130	13.1963	14.0648	12.9553	12.7548	14.108	13.2627	13.885	12.9632	13.7147	12.7828	12.4035
140	13.4065	14.2935	13.1729	13.4336	14.5091	13.6177	14.6357	13.1762	14.2142	13.293	13.1652
150	14.057	14.8617	14.0727	14.2308	15.5094	14.1101	15.354	13.8194	14.7842	14.2501	14.31
160	14.925	15.2884	15.6181	15.3315	16.2632	15.2352	16.7995	14.6962	16.1087	15.3721	15.351
170	15.6073	16.8307	15.9096	16.3908	17.1102	16.0918	17.4813	16.2666	17.0955	16.4373	16.0236
180	16.8516	16.6781	17.4623	16.9409	17.6868	17.1883	18.1006	17.0823	17.761	17.2257	16.867
190	16.7662	18.1373	17.5873	17.6881	18.5534	17.4835	19.0323	17.6426	18.3847	17.9635	17.2952
200	17.3771	18.6525	18.6656	17.9643	19.071	17.6304	19.6903	18.4298	18.4627	18.8198	18.0216
210	17.9088	19.2105	18.9543	18.3339	19.8701	18.4698	20.0837	18.9447	19.0895	18.8947	18.1462
220	18.3166	19.5955	19.4106	18.7511	19.6113	18.7349	20.5798	19.6763	19.5218	19.7545	18.915
230	19.3271	20.0459	19.6855	18.9431	20.4668	19.3581	20.9227	20.1754	19.6776	19.579	19.3053
240	19.5324	20.1018	20.188	19.2747	20.5583	19.641	21.0048	20.5979	20.2833	20.2683	19.5413
250	20.0709	20.5473	20.1724	19.391	20.6139	19.6487	21.2896	20.6578	20.5719	20.6136	19.799
260	20.1155	20.8021	20.8007	19.5544	20.7449	19.794	21.4595	20.9933	20.6979	20.8821	19.9732
270	20.6355	21.186	20.867	19.9446	21.1037	20.1197	21.755		20.9889	21.1475	20.0653
280	20.5336	21.4162	21.0948	19.9521	21.2219	20.3387			21.1946	21.1843	20.3729
290	20.9124	21.6469	21.4077	20.037	21.4749	20.5135			21.3155	21.602	20.6848
300		21.7969	21.6406		21.6291	20.2674			21.5683	22.0229
310	21.3914	22.2566	22.1225		21.893	20.3926				22.2108
320	21.1365		22.1537		22.62					22.4138
330	21.7882		22.0044
340
350
360
370
380
390
400
410
420
430
440
450
460
470
480
490
500
510
520
530
540
550
560
570
580
590
600
610
620
630
640
650
