# Supplementary material for: BUB-1 promotes amphitelic chromosome biorientation via multiple activities at the kinetochore
Source: eLife journal article supplement (doi:10.7554/elife.40690), 2018-12-14
Supplement: supp [file elife-40690-supp-v1.zip › elife_poa_e40690_Figure_5_figure_supplement_2_source_data_4.xlsx]

## Sheet: Sheet1
Control	Delta KD	K718R D847N
0.741245	0.528406	0.350984
0.495311	0.362917	0.233763
0.599267	0.410138	0.51519
0.425766	0.62975	0.563558
0.604443	0.503929	0.618595
0.384801	0.359844	0.625003
0.441622	0.54053	0.450734
0.367148	0.597618
0.275075	0.732062
0.217511	0.765963
0.381734	0.721322
0.572157
0.495956
0.739647
0.361943
0.395696
0.376706
0.74299
0.482506
0.633365
