# Supplementary material for: BUB-1 promotes amphitelic chromosome biorientation via multiple activities at the kinetochore
Source: eLife journal article supplement (doi:10.7554/elife.40690), 2018-12-14
Supplement: supp [file elife-40690-supp-v1.zip › elife_poa_e40690_Figure_5_figure_supplement_2_source_data_5.xlsx]

## Sheet: COntrol
time from nebd (s)	embryo_1	embryo_2	embryo_3	embryo_4	embryo_5	embryo_6	embryo_7	embryo_8	embryo_9	embryo_10	embryo_11	embryo_12	embryo_13	embryo_14	embryo_15
0	239.117	203.541	83.11	200.371	171.557
10	336.536	252.867	113.461	191.102	345.844
20	408.428	349.66	209.145	211.559	391.852
30	512.226	603.019	285.174	214.997	416.298
40	596.718	632.704	451.985	377.513	635.151
50	580.745	639.29	454.646	471.471	623.696
60	678.915	644.89	454.509	517.915	669.495
70	565.261	600.214	488.527	564.681	566.657
80	537.725	581.994	448.615	455.788	460.521
90	485.626	500.317	379.343	399.132	420.202
100	344.444	403.095	337.441	342.431	300.679
110	218.755	305.774	221.012	234.771	195.958
120	171.561	217.931	187.448	191.586	175.102
130	112.195	174.427	130.808	223.46	123.305
140	99.7588	132.26	127.235	192.194	112.774
150	81.5606	93.2893	112.668	177.769	64.3059
160	48.4999	62.163	74.0721	100.605	61.8657
170	43.5297	37.2687	40.1115	100.157	49.5081
180	24.8509	31.706	39.6331	71.1008	39.2871
190	19.5821	9.82832	21.8011	44.5726	29.8951
200	14.0628	7.61735	14.7118	38.032	24.3579
210	12.5727	2.96553	3.92013	29.2683	19.385
220	7.36183	-1.24156	0.776745	23.0202	19.0538
230	7.02831	-1.11237		19.2015	16.8932
240	4.80839	-5.53243		14.6052	14.975
250	2.69549	-10.1561		13.2569	10.5822
260	1.02653	-10.0783		8.01856	10.2101
270	-0.253129	-13.0641		7.91263	10.8334
280	-0.153593	-16.8274		4.85161	6.86576
290	-0.306911	-15.7844		2.05959	7.22542
300	0.0149317	-18.2625		2.92677	3.45341
310				0.340456
320				1.54103
330				-2.0731
340				0.273228
350				0.586423
360				-1.57285
370				-2.9476
380				-3.93307
390				-1.80902
400				-1.413
410
420
430
440
450
460
470
480
490
500
510
520
530
540
550
560
570

## Sheet: hcp-12
time from nebd (s)	embryo_1	embryo_2	embryo_3	embryo_4	embryo_5	embryo_6	embryo_7	embryo_8	embryo_9	embryo_10	embryo_11	embryo_12	embryo_13	embryo_14	embryo_15
0	137.653	203.717	274.11	408.59	196.32
10	96.6432	352.654	390.805	596.715	339.091
20	196.867	421.183	490.477	605.325	406.525
30	263.066	577.858	639.906	872.06	626.059
40	387.889	784.887	832.141	934.736	894.449
50	469.698	1150.02	827.146	944.741	1036.54
60	378.955	1165.02	1041.74	1072.51	1111.9
70	512.789	1268.19	1157.81	1216.86	1166.37
80	615.36	1397.12	1072.13	1054.77	1200.86
90	668.265	1452.52	1225.16	1228.68	1273.89
100	841.591	1296.41	1199.9	1243.8	1272.64
110	932.513	1115.23	1579.82	705.145	1377.45
120	1047.78	1115.07	1047.69	1668.07	1491.46
130	1273.93	1094.16	1076.61	2033.86	1622.05
140	1333.18	1252.85	1141.98	1564.99	1375.96
150	861.054	1256.1	1422.9	1730.71	1468.73
160	677.205	1095.86	1273.35	1589.04	1373.08
170	484.839	1213.82	1092.41	1428.36	1301.42
180	945.496	1232.51	858.303	1353.24	1159.45
190	968.31	1083.09	827.615	604.068	1181.23
200	350.223	1104.58	659.535	1002.57	1030.63
210	272.314	885.888	549.012	710.52	976.511
220	209.932	855.75	467.741	565.6	866.244
230	127.341	666.101	378.594	416.197	630.433
240	106.991	538.526	350.943	357.742	533.765
250	69.4694	385.578	281.61	284.081	476.668
260	56.5904	292.958	229.652	232.713	476.387
270	40.1925	279.261	185.247	236.93	384.741
280	29.2256	243.196	148.813	211.842	369.064
290	19.3109	210.912	93.7369	181.765	348.223
300	15.2994	195.209	64.2453	137.351	274.383
310	8.89854	179.496	42.4779	98.9033	216.474
320	5.52833	180.283	28.3147	72.896	171.808
330	1.64344	140.698	15.0274	58.272	116.424
340	1.48248	99.4529	3.19096	39.8443	78.9671
350	-0.0840758		-5.91908	28.874	58.0396
360	-2.93593		-10.1853	17.9978	38.2387
370	-5.71335		-18.0717	14.7531	24.0474
380			-21.1984	8.75991	14.3178
390			-27.5041	9.2759
400			-30.3487	3.64969
410			-32.1756	-0.225406
420			-32.7956	1.57342
430			-31.3831	-1.50078
440			-29.4298	-1.48064
450			-28.927	-3.67318
460			-22.46	-3.11693
470			-21.1261	-2.77352
480			-17.0658	-4.7449
490			-17.7849	-2.54856
500
510
520
530
540
550
560
570
