# Supplementary material for: BUB-1 promotes amphitelic chromosome biorientation via multiple activities at the kinetochore
Source: eLife journal article supplement (doi:10.7554/elife.40690), 2018-12-14
Supplement: supp [file elife-40690-supp-v1.zip › elife_poa_e40690_Figure_5_source_data_1.xlsx]

## Sheet: Feuil1
JDU529	JDU529HCP1	JDU529BUB1HCP1	JDU529ZYG1
170.329	11.5362	117.212	65.0015
62.9273	17.3434	97.629	52.4184
111.323	3.59988	97.6796	53.438
101.428	-16.0173	92.5113	89.365
82.4985	-1.95284	57.6585	126.542
95.8872	8.14815	86.4475	68.6975
92.1427	6.96217	132.266	114.56
130.416	10.6983	142.285	60.9299
80.2748	-2.37021	175.628	110.518
98.7409		49.6851	127.611
74.0327		107.461	43.4372
		45.3224
