# Supplementary material for: BUB-1 promotes amphitelic chromosome biorientation via multiple activities at the kinetochore
Source: eLife journal article supplement (doi:10.7554/elife.40690), 2018-12-14
Supplement: supp [file elife-40690-supp-v1.zip › elife_poa_e40690_Figure_5_source_data_3.xlsx]

## Sheet: Chr_Span_WT_bub-1+hcp-1
time from nebd (s)	embryo_1	embryo_2	embryo_3	embryo_4	embryo_5	embryo_6	embryo_7	embryo_8	embryo_9	embryo_10	embryo_11	embryo_12	embryo_13	embryo_14	embryo_15	embryo_16	embryo_17	embryo_18	embryo_19	embryo_20	embryo_21	embryo_22	embryo_23	embryo_24	embryo_25	embryo_26	embryo_27	embryo_28	embryo_29	embryo_30
0	9.33355	5.46026	5.57457	7.64466	7.04808	6.58248	5.99808	6.48803	5.52158	6.58248	5.94081	9.75812	7.36795
10	9.14466	5.13803	5.87949	6.15385	5.45983	6.19872	4.72714	5.49594	5.99145	5.29423	7.31218	8.56154	5.65556
20	7.00321	4.73526	4.70726	6.15021	5.16026	5.49145	4.46218	5.43034	4.57222	5.84038	5.66795	8.61945	4.93974
30	6.39637	5.95449	3.08355	5.95449	4.11004	3.975	4.84808	4.30256	4.82756	6.27628	7.29103	8.19872	4.14402
40	6.20684	6.22927	3.57585	4.8359	5.64979	3.6735	4.48483	4.12179	6.2032	5.24808	5.21474	8.56154	5.23013
50	6.3406	6.69658	3.8688	4.74444	5.59829	5.53419	5.82521	3.82906	6.0344	5.82521	4.64744	8.34423	4.47073
60	6.27628	9.12607	5.15855	4.38184	5.7938	7.66303	6.30534	5.39103	8.89658	6.8094	4.79722	6.89081	5.20385
70	6.49872	10.4496	6.24295	6.77991	5.39103	9.39573	8.20043	5.67115	8.13654	8.95192	5.63846	8.18056	5.75513
80	6.29722	13.3579	8.54338	10.0733	6.49679	12.6107	11.3549	7.44744	10.4799	11.9947	6.93419	10.0536	6.8391
90	10.2128	13.613	9.42372	11.6361	10.0004	14.0036	14.4972	11.1615	12.975	13.7752	11.3494	13.5524	11.7248
100	13.4284	14.6051	12.2656	13.4175	13.4425	16.3419	17.0502	16.756	14.2707	14.2393	12.3592	15.0098	14.4321
110	16.9466	14.2355	13.1961	15.5506	14.8192	17.7647	16.1519	17.8105	16.1094	15.6049	13.7714	17.3865	14.1444
120	19.2073	15.7658	14.9692	17.688	16.8957	18.6607	17.2966	19.585	17.7477	14.6177	18.6914	17.3769	17.4647
130	18.5964	16.084	16.056	19.7325	17.9355	18.0145	18.4506	19.4105	16.6733	16.2844	18.9915	17.3983	17.2654
140	20.5445	16.8293	15.0517	16.9637	17.3075	17.9425	18.2838	20.356	17.5528	15.5477	19.8987	17.406	16.9094
150	21.1504	14.3658	15.0735	18.888	17.4	17.7032	18.5801	20.1103	16.1494	16.2863	20.0641	16.2383	16.5336
160	19.5393	14.5739	15.9209	18.8047	17.3791	16.9842	17.4105	19.835	18.0299	15.2675		17.5682	16.7378
170	16.9457	14.6222	14.291	19.8389	15.7408	16.1254	17.0801	19.1186	17.3363	15.5359		19.4624	17.7214
180	17.0233	15.1175	14.8158	18.1763	16.8241	15.9098		17.7889	16.5994	12.5162		17.6389	16.6201
190	16.4568	14.8483	16.2773	17.7583	15.8846	15.6498	18.2496	17.7487	16.9564	13.9951		17.35	17.2308
200	17.5724	14.6402	16.46	16.7402	16.0534	16.816	16.8432	16.7385	14.3551	12.7987		16.2184	16.0838
210	16.6564	12.759	14.5011	18.1019	16.9444	15.54	17.2013	17.3562	17.8515	13.9853		17.2647	16.3812
220	18.2904	12.9485	14.4137	17.1842	15.8186	16.1365	16.7566	17.112	16.3763	12.1551		16.4974	16.1192
230	18.0051	13.734	15.4827	17.2977	15.9773	15.1712	16.19	17.2261	15.7994	13.1598		16.3925	15.8628
240	16.6765		15.1269	16.1545	16.187	14.7831	14.8983	17.5697	15.7079	12.8731		15.6028	15.312
250	14.2515		14.9887	16.2395	14.9859	16.4782	16.2021	16.2049	16.7064	13.809		14.056	14.9718
260	13.8545		14.8383	15.4932	14.1053	16.0769	15.9113	16.8611	16.0889	13.9968		14.356	15.2735
270	14.6075		14.8551	15.5329	14.6066	16.512	16.1494	16.7615	17.0773			14.1825	15.8838
280	15.3981		15.1472	16.1624	14.1767	16.4075	16.713	17.1414	16.2214			15.8449	15.413
290	15.3799		15.9421	17.1367		16.6002	17.04		16.7959			15.606	15.1603
300
310
320
330
340
350
360
370
380
390

## Sheet: Chr_Span_DKD_bub-1+hcp-1
time from nebd (s)	embryo_1	embryo_2	embryo_3	embryo_4	embryo_5	embryo_6	embryo_7	embryo_8	embryo_9	embryo_10	embryo_11	embryo_12	embryo_13	embryo_14	embryo_15	embryo_16	embryo_17	embryo_18	embryo_19	embryo_20	embryo_21	embryo_22	embryo_23	embryo_24	embryo_25	embryo_26	embryo_27	embryo_28	embryo_29	embryo_30
0	6.20235	6.62735	8.26645	5.7015	4.83141		6.67885	3.72073
10	6.80962	7.00363	6.53184	3.78376	6.14231		5.97949	4.71432
20	6.62585	4.7312	8.58547	3.33162	4.58697		6.27308	5.57201
30	6.16517	5.23739	3.6265	4.36902	5.30171	5.46026	6.31047	4.06538
40	3.90278	4.43504	4.79444	4.51539	5.51068	4.70299	5.09744	3.63868
50	5.64658	5.23526	4.6391	4.16047	5.62628	5.70598	4.24615	5.06944
60	3.96453	5.39957	5.51004	4.47735	7.55406	5.02286	5.30385	7.93803
70	4.34038	7.6391	6.46346	5.15299	9.05449	7.41047	6.7859	6.35342
80	4.7203	7.00107	6.90043	3.64081	8.03077	7.65791	5.54103	5.56282
90	5.62949	6.63761	6.02051	3.4968	9.22158	4.79744	6.1188	4.23184
100	9.9032	6.0703	5.49701	3.26389	10.163	5.20534	5.00107	5.06496
110	8.92244	6.0703	4.42692	2.8891	11.7861	6.21667	5.64893	3.41945
120	8.38697	6.56966	4.98226	2.32179	12.2421	4.68248	5.33803	3.48996
130	9.82927	5.4062	4.80556	2.37286	14.3526	4.4985	6.12585	4.01154
140	9.23291	5.11752	3.37714	2.25385	12.9733	3.90171	4.3656	3.79915
150	6.47778	6.025	3.89914	2.00791	12.9639	3.85214	6.03697	2.87115
160	6.83782	3.46026	2.67137	2.32179	13.7158	3.61068	3.50748	3.24829
170	6.90107	4.24979	2.79615	2.34316	13.119	2.72607	3.13462	3.27714
180	7.15983	4.05427	2.11325	2.30128	11.6481	2.9547	3.12414	4.7656
190	5.67137	2.97329	2.41325	2.13675	12.8427	3.16133	3.16368	7.70064
200	6.31154	3.47222	2.82863	2.61966	10.0515	3.50748	2.74936	9.62585
210	6.59573	3.24979	3.64658	5.95705	10.1987	7.1032	3.22094	11.3346
220	5.77927	4.91047	8.69594	9.20064	11.0126	9.26539	7.16859	11.4122
230	5.55278	8.90427	10.5483	11.0205	11.7545	10.4218	9.28697	11.5169
240	5.55256	11.5545	11.4615	10.7953	12.419	10.9105	10.2692	12.4303
250	8.91367	11.9043	12.7053	11.9147	13.009	11.9827	11.3071	12.5647
260	10.7455	12.3056	12.465	12.3564	14.1231	11.7329	10.9797	12.7564
270	11.1656	13.4026	12.9966	12.2147	14.2925	11.6361	11.6797	12.75
280	11.6194	14.8476	13.4925	11.96	14.6654	11.8006	12.5188	12.7692
290	12.507	14.1115	13.8355	12.7154	15.1936	12.8635	12.6504	13.3222
300	13.312	14.0953	15.1139	12.6083	15.3562	12.903	12.4968	12.9043
310	12.8874	14.1177	16.0457		15.3372	13.1103	13.4586	13.5694
320	13.31	14.0462			15.3201		12.9327
330	13.0622	14.0378
340	13.8355
350	13.8906
360	14.3177
370
380
390

## Sheet: Chr_Span_KR_DN_bub-1+hcp-1
time from nebd (s)	embryo_1	embryo_2	embryo_3	embryo_4	embryo_5	embryo_6	embryo_7	embryo_8	embryo_9	embryo_10	embryo_11	embryo_12	embryo_13	embryo_14	embryo_15	embryo_16	embryo_17	embryo_18	embryo_19	embryo_20	embryo_21	embryo_22	embryo_23	embryo_24	embryo_25	embryo_26	embryo_27	embryo_28	embryo_29	embryo_30
0	6.08098	8.12372	6.64209	7.37756	10.2835		5.55256	6.35748	6.59936	8.75064		3.86068	7.03013
10	3.8547	5.80043	5.54316	7.74038	7.96432		4.5391	5.78205	6.19487	6.81795		5.18974	6.01709
20	4.87265	5.10641	4.82671	6.72115	6.2297		6.0218	4.50748	6.8391	5.6718		4.14936	6.43248
30	4.14872	3.80705	4.21432	5.92586	4.5891	7.03675	4.25342	4.91923	4.35	5.30791		4.07414	4.08932
40	5.71795	4.12179	4.63846	5.77094	4.69359	7.26816	3.24936	4.12393	5.6985	5.34209		3.93355	3.85214
50	5.23825	4.98632	4.5453	5.59744	4.76966	6.1047	5.3515	4.33846	5.62714	4.5968		5.48996	4.5953
60	6.06581	4.56389	4.45278	4.82073	4.27607	5.42457	5.15598	3.97457	6.0609	3.38739		3.98162	6.16709
70	5.25321	3.99423	5.93697	6.27308	4.62863	6.13077	4.59893	5.6906	5.3438	4.6265	5.16816	6.21133	5.23932
80	3.88675	4.61859	6.17265	6.0344	3.51432	6.56688	3.3547	5.98013	5.27073	5.72778	4.39744	6.19658	4.19808
90	5.26923	4.28526	6.21581	6.58098	2.70278	6.30705	4.30684	4.69359	3.29573	6.45726	3.92265	3.98162	3.47991
100	6.51303	3.16133	5.73846	4.03974	2.36496	5.7938	6.88077	4.50876	4.41645	5.82479	6.06047	3.98162	2.83867
110	3.21389	3.20107	5.93397	4.28825	2.41047	3.2141	4.39594	5.25684	4.34701	6.89295	3.30491	3.69338	2.83867
120	4.45769	3.00235	7.12927	3.52393	2.20256	3.67927	2.96838	3.62628	2.93419	7.80513	3.14444	2.71966	2.58184
130	4.01154	3.50748	4.73226	2.72991	2.16325	2.83867	2.77778	2.87479	2.13675	5.71603	3.28333	2.66966	3.11111
140	3.21389	3.57265	2.91816	2.66111	1.81624	3.72714	2.58184	4.8562	1.93483	4.76859	2.67735	2.56902	2.58184
150	3.82906	2.19423	4.4438	2.86047	2.36496	3.45192	2.5485	2.5032	2.06667	4.30043	2.81047	2.47244	2.56859
160	3.65748	2.07051	3.17115	2.50107	1.72607	2.90021	2.10726	2.49423	1.78056	3.17521	2.87115	1.86966	1.9641
170	2.25235	2.15556	2.9062	3.1765	1.58825	2.79316	2.25385	2.19209	2.14145	2.99573	2.59273	2.28034	2.51474
180	2.15556	1.91773	3.20513	2.31902	1.76197	2.45085	2.00726	3.09829	1.5735	3.70598	4.06047	2.05449	2.48504
190	2.32543	2.49701	3.11111	2.96239	2.10449	2.38782	2.12073	4.49231	1.78056	3.52735	9.30214	2.70748	2.53953
200	1.78632	4.61859	2.82051	2.29701	2.16325	2.92799	3.63248	2.10726	1.64444	3.0453	11.4212	7.84295	2.77158
210	2.77778	9.07585	4.30021	2.49701	3.47991	7.96474	7.00898	3.58974	2.21261	3.52564	12.5214	11.035	3.29124
220	4.94744	11.1808	9.51389	2.71218	8.11538	9.98825	9.55577	3.96603	8.08868	3.44615	12.7286	12.594	7.86047
230	8.25299	12.4041	11.894	3.72073	9.94103	11.6263	10.5229	7.02949	11.0519	3.85534	13.5568	13.0496	11.3857
240	9.88697	12.8383	12.6291	8.22543	11.6457	11.9024	11.2383	10.0887	12.3746	7.52906	13.6404	13.5553	12.3684
250	11.4289	13.128	13.5923	10.1914	12.4028	12.7547	11.9017	11.3479	13.2199	10.044	13.5891	13.3508	14.0457
260	11.9464	13.5628	13.3803	11.8603	12.6182	13.6519	12.5214	12.9609	13.7613	10.9872	13.7303	13.4511	14.1062
270	12.5733	13.659	13.4709	12.934	13.1103		13.0814	13.3867	14.2682	11.5564	13.3363	13.2959	14.2258
280	13.0438	14.99	13.8122	14.3705	13.1092		13.4547	14.0754	14.6573	12.1026		13.206	14.5111
290	13.1496	14.3466	13.5814	14.0733	13.3252		12.8902	14.1107	14.4803	12.1256		13.2049	15.0865
300	13.8216	14.8947	14.6776	14.3028	13.5519		13.1062	13.7857	15.1483	12.6141		14.163	15.1577
310	14.3727	14.765	14.3357	14.8904			12.7585	14.4579	14.3874	12.6299		14.153	15.4711
320	15.4818		14.1229	15.2049				14.7675		12.9562
330	15.3748		14.9194	15.1327				15.0231
340
350
360
370
380
390

## Sheet: Chr_Span_DKD_bub-1+hcp-1_DSKA1
time from nebd (s)	embryo_1	embryo_2	embryo_3	embryo_4	embryo_5	embryo_6	embryo_7	embryo_8	embryo_9	embryo_10	embryo_11	embryo_12	embryo_13	embryo_14	embryo_15	embryo_16	embryo_17	embryo_18	embryo_19	embryo_20	embryo_21	embryo_22	embryo_23	embryo_24	embryo_25	embryo_26	embryo_27	embryo_28	embryo_29	embryo_30
0	6.09786	4.99658		6.1109	6.62671	5.86731	6.50385	9.28504	5.49551	4.70107	5.61132
10	5.99145	5.35385		6.11923	4.47073	5.23825	5.88483	7.9609	4.73526	3.73932	5.76453
20	5.70192	4.66004	9.00085	5.91859	5.31517	4.56795	5.18248	5.39893	6.61325	4.17222	6.13547
30	4.58718	4.9032	5.84081	6.48312	4.92286	4.27607	5.55256	5.2938	6.08462	4.70107	5.78761
40	4.2282	4.97051	5.68462	5.64979	4.39573	5.7265	4.35812	4.07906	6.37457	4.60513	4.63846
50	3.7344	4.92073	5.63077	6.78141	4.04979	4.02308	6.48205	5.81175	10.1231	4.39209	3.70876
60	4.66068	5.60876	5.83953	8.71218	3.71474	5.88761	8.49487	5.94252	8.05342	4.44957	4.05727
70	5.3891	4.97714	5.90128	9.5282	7.82991	8.42457	7.54017	7.69551	8.1812	6.85086	5.07906
80	6.66667	8.61688	8.25043	10.1771	6.99316	10.665	8.23761	6.79038	10.3167	7.28077	8.81004
90	7.07714	12.469	10.7028	11.6583	9.3735	12.4359	7.85748	7.13141	10.1592	8.62051	9.39829
100	7.84444	14.4177	10.8312	12.9513	11.6575	12.5583	10.6677	8.27308	13.4547	8.35791	10.3026
110	11.3532	13.1487	12.2643	12.9741	12.778	14.2098	13.0017	12.6408	13.0823	11.1327	8.39615
120	11.5395	14.2083	13.5109	14.316	12.1654	15.412	13.9692	11.2592	15.5271	9.81774	9.45791
130	11.9209	15.1019	13.9938	15.5468	13.7361	14.9297	13.9692	13.5553	15.3297	12.3306	8.34423
140	12.594	18.0639	13.2872	15.3233	13.7714	17.0383	12.2468	14.3389	12.9934	13.9105	10.3827
150	12.3598	17.7049	16.9709	14.9656	14.9944	16.909	12.7893	15.1961	13.9675	12.8665	12.2613
160	13.1043	17.0248	17.4558	16.7865	14.9737	17.8122	14.1271	18.2254	13.0596	12.8844	12.8703
170	14.8423	17.3998	18.0929	17.2741	15.4124	19.2361	17.7677	16.8737	13.3222	14.8581	14.0897
180	16.3447	18.0269	17.4233	16.4603	13.6284	18.4387	15.8135	18.0947	16.9895	14.0938	12.3835
190	13.7707	17.3098	17.0827	17.2748	16.187	17.9513	15.625	18.0288	15.3053	15.8297	14.41
200	17.6622	19.4231	18.2432	17.206	15.3109	17.8509	13.5788	18.3983	15.3491	15.3141	15.75
210	14.2855	16.2085	17.9331	14.9147	15.9688	15.6727	13.7825	16.1479	13.4735	13.9385	16.5716
220	16.7855	16.9378	15.6167	14.4179	15.3581	16.4876	13.141	16.9996	12.9073	13.4107	16.2904
230	15.3848	15.4568	15.0998	13.4124	16.319	15.3408	12.8316	14.8318	12.6823	11.9701	17.4857
240	14.2635	13.8239	14.3818	12.6182	16.6778	15.8357	12.4895	14.5385	10.5925	12.8393	17.4427
250	14.4889	15.2028	13.8596	13.0242	15.0491	14.9953	12.6085	13.3564	12.8404	13.1801	14.2744
260	15.1709	14.0487	13.9269	12.1959	14.8192	12.6182	13.2143	13.7472	14.2692	13.4081	13.8915
270	15.306	14.2885	14.04	12.6269	13.1502	13.8412	13.5889	12.2047	13.8487	13.5081	13.1
280	14.5111	14.5806	13.9378	13.0635	14.218	14.2579	13.0346	13.859	13.1197	14.156	14.2111
290	14.6056	14.2147	14.0479	12.8415	14.0667	14.688		13.6769		14.715	13.7263
300	14.5739		13.9009		14.465	15.1863		13.84		15.2793
310	15.11		14.0532		14.5865			14.3558
320	14.8124				14.006
330	15.1863
340	15.584
350	15.4564
360	15.6556
370
380
390

## Sheet: Chr_Span_KR_DN_bub-1+hcp-1_DSKA
time from nebd (s)	embryo_1	embryo_2	embryo_3	embryo_4	embryo_5	embryo_6	embryo_7	embryo_8	embryo_9	embryo_10	embryo_11	embryo_12	embryo_13	embryo_14	embryo_15	embryo_16	embryo_17	embryo_18	embryo_19	embryo_20	embryo_21	embryo_22	embryo_23	embryo_24	embryo_25	embryo_26	embryo_27	embryo_28	embryo_29	embryo_30
0	5.78462	6.07372	4.50128	6.69081	6.2406	6.08547	6.78568	3.98932	4.27885	6.62735	5.7938	8.35791	5.93782
10	4.99231	6.59637	4.27414	7.38419	5.98461	6.09594	4.70577	4.92735	3.85214	6.91026	5.23932	8.03846	5.55662
20	4.8438	5.38974	3.91795	5.22628	5.52158	5.49679	4.68269	5.14594	3.88312	5.77094	4.925	8.77692	5.45812
30	4.8438	5.28611	3.92329	5.77329	5.0656	4.84017	3.72094	5.60107	4.74444	5.70513	5.28611	8.55299	5.9235
40	5.55107	4.23333	4.06047	6.96496	4.71432	4.37329	3.95449	4.89017	4.71667	4.2047	4.38547	8.02415	4.0047
50	5.57201	4.625	4.7094	7.05449	5.925	3.70171	6.11132	5.77094	4.98825	5.64295	4.60513	7.37885	4.50876
60	6.3391	3.65748	5.98461	10.5748	6.67927	3.4203	6.44316	4.45021	6.27073	7.27372	5.44765	8.49487	7.67158
70	7.2359	5.6985	6.28226	11.9662	9.84273	4.58333	5.96197	4.43312	10.4487	8.34829	5.49979	9.6141	8.11538
80	7.31432	7.58633	11.6098	12.566	8.53397	4.53226	10.5985	6.68184	9.93312	9.69316	3.78633	10.0688	10.2742
90	8.6265	7.19701	11.4682	14.4579	10.7628	7.05449	10.6453	7.04402	10.7541	8.91709	7.99637	10.8585	11.4795
100	8.85513	8.88739	14.2594	14.143	9.79615	8.67479	11.3962	8.72393	11.8263	11.2761	9.47479	12.6818	13.0083
110	9.7265	9.64274	15.6799	14.7254	12.8876	8.89658	11.9829	10.8079	13.6694	13.5419	9.27585	12.4318	13.3718
120	12.0491	10.909	15.3951	16.75	12.5462	11.3077	13.6154	9.4797	13.5735	14.1825	12.031	11.6139	13.61
130	12.0759	11.4615	17.5331	14.7254	17.0282	12.775	13.1184	13.4222	12.4432	14.4594	11.5647	12.1838	16.5581
140	13.6872	11.759	17.8062	18.7891	14.5008	12.4895	13.9209	13.6904	15.5449	14.2457	12.857	14.1466	16.2169
150	12.819	11.9987	17.31	17.0744	14.1083	12.75	13.8596	15.1836	16.3714	14.1113	11.1261	11.5068	15.781
160	12.9906	14.4957	17.7374	18.6094	13.103	15.2816	15.3404	14.7248	17.3919	13.4222	14.197	14.5382	17.5011
170	13.8908	13.1444	17.3254	15.5017	15.8825	16.2338	14.0547	14.6863	15.3077	16.0974	14.8934	13.5318	17.8754
180	17.9162	14.1479	14.6019	16.585	16.1494	15.2577	14.431	15.2835	15.385	15.6827	15.6115	13.8746	16.7596
190	13.8523	15.5752	16.0258	13.7288	14.1329	16.3727	14.5961	15.7863	14.103	17.2389	13.2276	13.5814	17.26
200	17.21	14.1639	15.4573	13.2694	13.5141	16.2184	14.5004	14.6028	14.5996	17.3784	15.5577	14.0573	16.0288
210	15.2216	13.3996	14.3211	12.8316	13.6517	15.4105	15.1863	13.613	12.3284	15.6833	12.4927	10.0229	16.2731
220	14.1135	13.0622	14.4043	13.3547	13.5442	16.8308	16.3466		12.6709	14.8902	13.8164	13.5026	15.6103
230	12.6998	12.4336	13.6938	13.4009	13.5158	14.9579	13.9925		12.0513	14.5314	11.2135	11.7585	15.9932
240	12.6246	12.3951	14.1171	13.4671	13.5711	15.4126	13.5688		11.6184	13.5806	11.6761	11.6457	15.2778
250	12.9977	12.9639	13.6799	13.8729	14.2184	12.1684	13.8113		12.3585	14.032	11.3479	11.4615	14.7966
260	13.303	13.16	14.325	14.2996	14.6066	13.2902	14.3823		12.71	13.9197	10.1782	10.8808	16.2312
270	12.3547	12.9203	14.334	14.7312	14.528	13.2066	13.9111		13.2419	14.1955		12.0519	14.9806
280	12.8876	12.9489	13.6976	13.7051	14.9799	12.9092	13.8164			14.6573		12.2248	15.0705
290	12.9515	13.575	14.7479	14.4641	14.9404	13.1197	14.1998			14.9741		11.5068	15.3806
300	13.7066	13.56			15.3021	13.0996	13.3547			14.463		12.107	15.3077
310	13.544	13.5444			14.7944	13.2801	13.6367					12.7823	15.8323
320	13.4397				14.9199	13.7051							15.812
330	14.4716					13.3406
340	13.5829
350
360
370
380
390

## Sheet: Pole_dist_WT_bub-1+hcp-1
time from nebd (s)	embryo_1	embryo_2	embryo_3	embryo_4	embryo_5	embryo_6	embryo_7	embryo_8	embryo_9	embryo_10	embryo_11	embryo_12	embryo_13	embryo_14	embryo_15	embryo_16	embryo_17	embryo_18	embryo_19	embryo_20	embryo_21	embryo_22	embryo_23	embryo_24	embryo_25	embryo_26	embryo_27	embryo_28	embryo_29	embryo_30
0	8.05251	9.52833	11.6061	11.639	9.6372	12.3244	9.80045	12.2002	11.1488	12.074	10.773	11.1844	9.76526
10	8.35049	10.0465	12.3575	12.3075	9.7989	12.7079	11.3318	12.1972	11.9328	12.026	10.9447	11.8094	10.2707
20	6.88784	10.6267	12.6717	12.1352	9.9368	13.0961	11.5275	12.2033	12.5903	11.8526	11.3333	12.6189	10.5953
30	7.54999	11.2966	12.8834	12.4021	10.1252	13.0097	11.3861	12.3111	12.6599	12.7605	11.4813	12.6062	11.0766
40	8.21954	11.8141	13.6476	13.1814	10.2782	13.1782	12.1603	12.4613	13.1924	13.3197	11.6405	13.6498	11.793
50	7.39786	12.1758	13.6179	13.5867	10.4911	14.1041	12.9194	13.5737	14.1254	13.6523	11.5022	14.4352	12.565
60	8.64672	13.0145	14.5823	14.1179	12.2174	14.9104	13.7736	14.0709	15.599	14.4385	12.3535	14.7595	13.2409
70	9.32339	15.2253	14.7578	15.0514	11.0196	15.5949	14.6653	14.7495	16.0956	15.3222	13.5301	15.352	13.9824
80	10.2272	17.6421	15.3425	16.8648	11.6277	17.8245	16.8889	15.7439	18.0037	17.2475	13.5138	16.9038	15.1623
90	12.6091	19.0333	16.1569	17.1112	13.6787	19.9055	18.9871	17.197	19.5122	19.0196	15.3624	18.6226	16.9218
100	15.51	20.1863	17.7328	18.7634	17.1155	21.7365	21.1854	20.8396	20.6569	19.2147	17.1507	20.1523	18.9145
110	19.817	20.4695	19.3126	22.0102	19.1861	22.6687		22.3898	21.3982	20.7894	19.1895	21.7155	19.6623
120	22.3194	20.7468	20.2879	22.296	21.4151	22.8783		24.3242	22.4002	20.4119	22.622	22.4733	21.7031
130	22.9538		21.0383	23.9286	22.3639	22.754	24.0513	24.3852	22.6386	21.5945	22.7157	22.3927	21.6832
140	23.8777	21.042	20.6802	22.6626	22.8064	22.5664	23.2301	24.0464	24.0373	21.1083	23.7147	23.0355	21.7972
150	24.3923		21.1765	24.0245	22.9441	23.0555	22.3197	24.4215	22.8348	21.2525	23.19	22.7394	21.8816
160	23.9872	19.7562	21.4486	23.8265	22.5968	22.3393	21.6622	23.8728	22.7463	21.0695		22.1079	21.2288
170		19.8493	20.6855	23.1972	21.6564	22.4374	22.4419	22.9376	22.6635	20.8774		22.2403	21.6996
180	21.5444	20.2882	20.2629	22.8124	21.917	21.7736		22.5954		19.4611		20.9651	21.3498
190	21.5784	19.2407	21.0417		21.1614		22.9357	22.9959	22.6881	20.1056		21.2464	21.2855
200	21.6572	19.5979	20.2942	22.0794	21.9154	21.8678	21.6518		21.0001	19.5765		21.3102	19.9646
210	20.8004	19.4267	20.0327	22.418	21.9237	20.6898	22.2493	22.0162	22.1316	20.2451		21.1844	21.463
220		19.0478	18.7753	21.6769	20.8884	21.4099	22.6108	21.4749	21.3847	19.3794		21.247	20.762
230	20.5856	19.7264	19.9605	21.7355	21.7421	20.5617	22.9863	22.7839	22.1223	19.9663		20.5896	20.8671
240	20.1238		19.4571	21.5779	21.4366	20.8215	22.1619	22.6151	20.967	20.1748		19.9571	20.7366
250	18.0262		20.5404	22.1032	20.7208	21.9142	23.5901	21.6415	21.9942	21.5226		20.1583	20.9533
260	17.3314		21.3706	21.8921	20.3531	22.0327	23.3552		21.3415	21.2703		19.2874	21.1736
270	18.8006		21.5659	22.5556	21.1033	22.0908	23.1714	22.4223	22.9602			20.5717	21.6686
280	19.0984		21.9224	22.6285	20.434	22.0595	23.4394	23.0676	22.4542			21.7734	21.6563
290	19.5996		22.4183	23.1217		22.4438	23.8286		22.7487			22.4328	21.4555
300	21.1437		22.2998	23.2846		22.5336			22.4726			22.7343	21.8896
310	21.1267		22.1947	23.3896			24.1787		23.0881			22.2826
320	21.6607		22.9462	23.4947		23.552			23.3724			22.8459
330	22.303		23.3549	23.284		23.8505			23.5006			22.8463
340	23.0477		23.7989	23.9586		23.8586			22.9997			22.7378
350	23.2102		24.2403	23.5526		24.0397			23.3599			22.7507
360	23.2914		24.3723	23.319		24.6507			23.6293			22.3183
370	23.7073		24.3599	22.6608
380	23.9077			22.7948								22.6916
390

## Sheet: Pole_dist_DKD_bub-1+hcp-1
time from nebd (s)	embryo_1	embryo_2	embryo_3	embryo_4	embryo_5	embryo_6	embryo_7	embryo_8	embryo_9	embryo_10	embryo_11	embryo_12	embryo_13	embryo_14	embryo_15	embryo_16	embryo_17	embryo_18	embryo_19	embryo_20	embryo_21	embryo_22	embryo_23	embryo_24	embryo_25	embryo_26	embryo_27	embryo_28	embryo_29	embryo_30
0		11.5179	11.3453	10.2848	11.1442	7.87719	11.5594	11.3317
10	9.89635	11.803	11.927	10.3644	12.0847	8.46502	11.8327	11.2717
20	10.731	12.2593	13.8253	10.9717	12.9976	8.72315	11.9038	12.0675
30	11.0023	12.7724	14.1284	11.8275	13.69	10.4029	11.7745	12.324
40	11.4648	13.0299	15.3377	12.6053	14.5222	11.7976	12.7041	12.9133
50	12.0326	13.1776	16.4015	13.4425	15.3925	12.4203	13.0888	12.7209
60	13.2002	13.8535	17.1043	13.2359	16.2946	13.5556	14.0737	13.2203
70	14.4749	14.3986	17.0024	13.7995	16.9536	14.41	14.1897	13.8604
80	15.4501	13.9019	17.305	14.1298	17.3243	14.769	13.8874	13.4102
90	16.1647	13.8146	16.3118	13.9948	18.4693	15.6375	14.1868	13.6957
100	16.0428	13.9009	16.1857	13.9451	19.6864	14.855	14.202	13.6716
110	16.0489	14.4734	15.5879	14.0765	21.1094	14.7758	14.5634	13.3648
120	16.4707	14.6486	15.2379	13.8944	21.7155	14.5926	15.1557	13.1682
130	16.0156	14.2703	14.9043	14.128	22.442	14.3121	15.0194	13.18
140	16.0176	14.5585		13.868	22.9042	14.4547	14.8433	12.8688
150	15.229	14.5368	14.7546	13.716	22.393	14.357	14.4168	13.2456
160	15.1455	14.5455	13.6896	13.1637	22.3629	13.9105	14.5129	13.8588
170	15.1181	14.5519	14.6226	13.8808	22.156	14.0115	14.8377	14.4593
180	15.4136	14.8314		14.1853	20.9519	14.3655	14.6379	15.7865
190	14.9811	14.8417	14.5765	14.1792	21.1797	14.8924	14.9186	18.5446
200	14.5882	14.4652	16.009	15.4412	20.3995	15.3764	15.4663	20.3188
210	15.229	15.944	16.8441	18.2486	20.7402	19.3056	16.7043	21.536
220	14.8543	17.5346	21.0956	21.053	20.0143	20.1816	20.1248	21.743
230	15.5073	21.4208	22.5871	21.2049	20.9618	21.3594	20.9315	21.9098
240	16.0085	22.5352	22.9844	21.8559	21.5879	21.3247	21.7041	21.9532
250	18.9524	22.9778		22.2654	22.7073	21.7581	22.5101	21.4568
260	21.226	23.1866	23.6185	22.4759	23.1246	21.6501	22.086	22.1553
270	21.0924	23.3207	24.0938	21.7537	23.3873	20.8058	22.5752	21.7972
280	21.4688	23.3974	24.2199	22.1578	23.7506	21.3538	22.6655	22.1172
290	21.9301	23.4287	23.637	21.9908	24.0888	21.693	22.8878	21.91
300	22.4155	23.4594	24.3097	22.0855	24.2397	21.8115	22.3829	21.7364
310	22.1072	23.2975			24.035	21.8311	22.6458	22.0639
320	22.1082	23.4707			24.0547
330	22.3806	22.9329			24.8141
340	22.0708	22.9454			24.9204
350		22.9289			24.9817
360
370
380
390

## Sheet: Pole_dist_KR_DN_bub-1+hcp-1
time from nebd (s)	embryo_1	embryo_2	embryo_3	embryo_4	embryo_5	embryo_6	embryo_7	embryo_8	embryo_9	embryo_10	embryo_11	embryo_12	embryo_13	embryo_14	embryo_15	embryo_16	embryo_17	embryo_18	embryo_19	embryo_20	embryo_21	embryo_22	embryo_23	embryo_24	embryo_25	embryo_26	embryo_27	embryo_28	embryo_29	embryo_30
0	11.2406	12.1083	12.3394	13.1392	9.24138		11.8417	12.5706	12.4062	9.41544		12.2415	11.8872
10	11.3376	12.1063	12.8034	13.2559	9.33968		11.5748	12.2447	12.8274	9.36506		13.3002	11.4653
20	11.6348	12.727	13.0249	13.5364	10.128		11.683	12.3638	12.6781	9.17115		13.8445	11.7459
30	11.6062	13.076	12.9024	14.2234	10.6491		12.1961	12.3998	13.1495	9.39629		14.8501	11.6002
40	12.1771	13.4901	13.4653	14.3338	11.4745		12.9661	13.181	13.7681	9.55144		15.2594	12.8032
50	12.8832	14.08	13.8135	14.7715	12.1682	10.61	13.3828	14.1587	14.6128	9.80428		14.7938	14.0514
60	13.5279	14.0612	14.6984	14.7965	12.8197	10.9252	13.5866	15.4549	15.3471	10.6884		14.2014	14.4878
70	14.2257	13.9766	15.9092	15.4379	14.0769	12.7565	13.9974	16.2438	14.5541	11.6325		13.7392	14.5344
80	15.2685	13.0392	15.7096	15.8664	13.6953	13.3034	13.787	16.5433	13.5482	11.8093		12.8225	14.1791
90	15.3996	11.8393	15.0873	15.4165	13.145	13.2712	13.1367	16.2656	13.0355	12.3716	12.2052	12.3463	13.6703
100	14.4139	11.7206	14.582	14.7797	13.1308	13.7093	13.0592	16.2824	12.2825	13.7719	13.4181	12.6224	13.4498
110	13.9969	12.3996	14.0456	14.1194	13.1956	13.248	13.6007	15.5317	12.1952	14.5586	13.8238	12.6568	13.1721
120	13.2539	12.5508	13.6502	13.7193	13.7926	13.262	13.4804	15.1401	12.6154	14.8832	14.5661	12.7765	12.7159
130	12.9187	12.6496	13.8686	13.7176	13.4823	13.4161	13.343	14.5114	12.1391		14.7773	12.4226	12.2239
140	13.0283	12.4413	13.4225	13.9028	12.9373	13.1372	13.1882	14.0839	12.3793	15.6843	14.9151	12.7429	12.4108
150	12.8701	12.9862	13.56	13.7102	13.0054	13.3883	13.1608	14.6358	11.9944	15.5558	14.7506	12.6438	12.3578
160	13.0221	12.5361	13.4867	13.6116	13.274	13.2399	13.2933	14.7572	11.6522	15.1663	14.8126	12.8113	12.7034
170	12.9381	12.0798	13.7737	13.7274	13.1097	13.3293	13.3828	14.4892	12.1249	15.4325	14.756	13.0206	12.7901
180	12.8098	13.0366	13.8836	13.8197	13.338	13.3588	13.801	14.7561	12.2668	15.0073	14.7876	13.508	12.6249
190	13.2022	12.9191	13.841	13.9574	13.6157	13.8593	14.0038	14.3902	12.0462	15.0822	15.5201	14.2807	13.3198
200	13.7484	15.7068	14.607	14.2686		14.9253	15.8787		12.3968	14.6899	17.5585	19.0331	13.4931
210	14.8095	19.4017	16.5926	14.4102	15.3579	19.3253	18.0304	14.5191	13.0467	14.7351	21.6988	20.8197	14.5297
220	16.8393	20.854	21.1224	14.9203	19.3817	20.4229	19.7943	16.2172		14.8734	22.7245	21.977	19.1465
230	19.8717	20.6256	22.5459	16.6636	20.5527	21.863	20.6766	18.8542	19.9738	16.6733	23.6425	22.3355	22.5094
240	20.9159	21.9034	23.5098	19.809	21.8094	22.0906	21.0544	21.4508	21.677	19.4402	23.7008	22.3582	22.0706
250	21.9231	21.6285	22.8534	21.3608	21.9234	23.2012	21.655	21.8174	22.1259	20.7185	23.2766	22.13	23.2539
260	22.382	22.0748	23.5847	22.3815	22.5509	23.3484	21.8312	22.2952	22.7982	21.1606	23.5253	21.9995	23.2444
270	23.0217	21.6476	22.8627	23.2376	22.5391	22.8361	21.8922	22.7375	22.9193	21.7674	23.54	21.6993	23.4618
280	23.2003	22.0648	23.3867	23.9453	22.9715	22.4104	21.7507	22.956	22.8201	21.4474	23.243	21.9666	22.7672
290	23.4174	20.9279	22.6194	24.4141	22.756	22.6653	21.6541	22.8247	22.6839	21.2132	22.8731	21.4776	23.0459
300	23.9068	22.0284	23.6442	24.504	23.1048	22.7828	21.7388	22.3879	23.0517	21.2713	23.0009	21.9844	23.349
310	24.1211	21.7896	23.4087	24.3695		22.424	21.477	22.3071	22.3772	21.3725		21.7398	23.6102
320	24.4124	21.7411	23.2208	24.3061		21.7009	21.4103	22.8608	22.6298	21.4328		21.6189	23.3601
330	24.7188	21.5679	23.8396	23.8529			21.3628	22.6886	22.9103	21.8581		21.9193	23.9792
340	24.3722		22.8387	24.0258				23.2161	23.0423	21.8895
350	24.9586		22.319	23.9845						21.98		22.7122
360	24.3115	21.963		23.4079								22.5402
370	25.0746	21.8917		23.1973								22.5396
380
390												23.303

## Sheet: Pole_Dis_DKD_bub-1+hcp-1_DSKA
time from nebd (s)	embryo_1	embryo_2	embryo_3	embryo_4	embryo_5	embryo_6	embryo_7	embryo_8	embryo_9	embryo_10	embryo_11	embryo_12	embryo_13	embryo_14	embryo_15	embryo_16	embryo_17	embryo_18	embryo_19	embryo_20	embryo_21	embryo_22	embryo_23	embryo_24	embryo_25	embryo_26	embryo_27	embryo_28	embryo_29	embryo_30
0	10.6061	10.3468	7.36268	11.4003	11.7046	12.9215	12.177	9.32743	13.2881	11.7389	11.1157
10	10.3183	11.1181	8.24232	11.4747	11.5861	13.1517	12.484	9.45546	13.2747	11.6502	11.5831
20	10.8074	11.7598	9.23431	11.7469	11.8208	13.1798	12.4903	9.28706	12.8885	12.2715	11.5398
30	10.7531	12.1918	9.16598	12.393	11.5994	13.2201	12.7557	9.41788	14.0819	12.814	12.4566
40	10.8458	12.6907	10.805	12.5874	11.7817	13.6846	12.9168	9.85764	13.7758	12.9808	11.9134
50	11.0618	13.7012	11.4124	13.7417	12.5948	14.4164	14.6034	10.9997	14.5942	13.9559	12.8715
60	11.5878	14.3172	12.8269	14.4939	13.0016	15.1705	15.2728	11.5909	15.2567	15.0825	13.6427
70	12.3059	14.6805	14.1671	16.0409	13.9018	15.5063	17.12	12.2228	16.0679	15.5888	14.0969
80	13.402	16.1996	15.5362	17.0726	14.3719	17.1132	18.284	13.2884	16.8587	16.7554	14.6483
90	14.066	18.6198	16.9234	18.0316	15.1123	18.1964	18.7112	14.3384	18.3044	17.0391	15.2161
100	15.2036	19.7353	18.1199	19.0124	17.0046	19.879	20.2677	16.1003	20.2063	17.4835	15.7159
110	17.5328	20.5981	19.5286	20.3618	18.6618	20.5474	21.5034	18.208	21.1071	18.0391	16.5677
120	18.4676	22.5032	19.8073	21.246	20.0509	21.1923	22.2077	18.7002	21.6536	18.9841	16.6122
130	18.5343	22.8086	20.7082	21.9713	20.7221	21.2968	22.9182	20.3722	21.5507	19.5001	17.7119
140	19.9528	23.4277	22.5737	21.798	21.455	22.4017	22.4849	20.3907	21.1965	20.1818	18.1058
150	20.4481	22.9508	23.8644	22.2728	22.6826	23.0649	22.6658	21.986	21.8361	20.6518	19.5881
160	21.2522	23.4423	23.9355	22.4357	22.8134	23.7245	23.0563	23.0032	21.5836	20.3244	20.316
170		23.6056	24.5603	22.895	22.4768	24.4451	23.5642	22.4006	21.9753	20.8899	20.423
180		23.301	24.2609	22.5966	22.2606	24.0975	22.876	22.9854	21.8422	21.1731	21.592
190		22.898	23.969	21.5368	22.8757	24.0674	23.1314	23.0914	21.8052	21.4577	22.2452
200	21.849	22.9451	24.4774	22.029	23.284	23.434	21.4787	23.1002		20.9725	22.7249
210	20.4044	21.7622	23.6898	20.9816	23.3455	22.4483	21.5568	22.0308	20.2692	20.2331	22.6575
220	21.1499	22.9697	22.6728	21.3775	23.0668	22.2015	22.1387	21.936	19.6591	20.6452	22.6203
230	21.0604	20.9114	22.9421	20.1364	22.9114	22.1337	22.2855	20.989	19.677	19.8386	22.7971
240	21.8024	21.5773	23.0939	20.8433	22.3567	22.3006	22.2228	22.0669	18.3612	19.7274	22.2871
250	21.5807	22.4736	21.562	21.1912	20.9596	21.9082	22.6882	21.0033	20.7711	19.8517	22.1432
260	20.9064	22.1493	22.8304	20.6774	21.6537	21.2746	22.2063	21.7502	21.2409	20.2562	22.676
270	21.7405	22.9699	22.7693	20.9949	20.7369	22.1259	22.568		21.6925	20.2269	21.8771
280	21.1942	22.4527	22.8027	21.3643	22.0482	22.4617	22.1329	22.2599	21.2837		22.264
290	21.047	22.5527	23.1208	21.2899	22.5759	22.6717		22.3663		21.3038	22.1114
300	21.7106	22.8503	22.8749		22.2063	23.0533		22.2873		21.6644	22.4472
310	22.0605	22.6089	23.4751		22.1983	23.3413		22.5024			22.0153
320	22.1484	22.4258	22.8134		22.0794	22.9005		22.0287		22.5	22.228
330	22.4876	22.7152	22.7966		22.484	23.0625		22.4171			21.9429
340	22.5413		22.5158			23.4099		22.1876		22.5495	22.0382
350	22.1867		22.5972					22.7212		22.7203	22.2608
360	22.4614		22.6114					22.5212		22.7223	22.2274
370	22.7617							22.7195
380	22.7648		22.1558					22.9072		22.3928
390			22.1358							22.7298
			21.5833
			20.4638

## Sheet: Pole_Dis_KR_DN_bub-1+hcp-1_DSKA
time from nebd (s)	embryo_1	embryo_2	embryo_3	embryo_4	embryo_5	embryo_6	embryo_7	embryo_8	embryo_9	embryo_10	embryo_11	embryo_12	embryo_13	embryo_14	embryo_15	embryo_16	embryo_17	embryo_18	embryo_19	embryo_20	embryo_21	embryo_22	embryo_23	embryo_24	embryo_25	embryo_26	embryo_27	embryo_28	embryo_29	embryo_30
0	11.768	10.5447	12.3436	7.01062	11.4151	11.9469	12.0787	10.1504	12.5265	12.5347	9.78557
10	11.6242	11.0902	12.5334	7.31569	11.5735	12.4059	12.1917	10.3991	12.1983	12.7205	9.611	6.83094
20	11.8828	10.561	13.1018	8.36269	11.8445	12.4733	12.3947	10.5374	11.954	13.3594	9.51812	7.40236	11.1788
30	12.2275	10.5784	13.2469	9.48605	12.0997	12.7864	13.1357	10.4815	11.9141	13.3937	9.88303	7.70491	13.0507
40	12.47	11.0883	13.9568	11.4977	12.8132	12.2209	13.106	10.2947	12.8955	14.4542	10.5427	8.53987	13.6833
50	13.2546	12.5811	14.3651	13.3212	13.5772	12.7485	13.9137	10.9774	13.7923	15.0218	11.1591	10.4353	14.7208
60	13.8721	13.7162	15.5856	16.4503	14.6239	12.9043	14.5887	11.9265	14.4294	16.2414	11.5974	11.6993	15.6578
70	15.3802	15.351	16.3998	18.7963	15.3464	13.3976	15.6576	13.1203	15.759	17.4605	11.854	12.9947	16.8136
80	16.1772	16.1983	18.2676	20.1165	16.1149	14.683	16.5506	13.9168	16.5171	18.1471	12.2378	15.2747	17.158
90	17.1953	17.2702	19.6063	20.7214	16.6619	16.2971	17.6128	15.2574	17.5612	18.589	13.3004	16.8656	17.6469
100	17.6352	18.2742	20.9894	22.0804	17.3834	17.2119	18.8626	16.6159	18.319	19.2756	14.3833	17.8139	20.0828
110	17.9796	19.4792	22.1392	23.0638	19.4553	18.1108	19.0471	18.7785	19.6757	20.4704	15.3682	18.7516	20.1085
120	19.0382	20.0566	23.8782	24.0226	20.4893	19.0231	20.3362	18.6959	20.2326	20.5743	16.7118	18.7155	20.8405
130	20.2831	20.7867	23.6891	24.6386	21.6929	19.7924	21.1139	20.7368	20.5732	21.1961	17.0053	19.7992	22.2732
140	21.0566	21.7486	24.2289	24.3549	22.2325	20.7368	21.8202	17.6468	20.9155	21.375	18.5973	20.7024	23.1773
150	21.1846	20.9919	24.2983	23.944	21.0071	20.0742	22.0167	22.4069	22.2691	21.7846	18.7814	20.4111	23.6076
160	22.3004	21.5728	23.989	23.482	21.379	22.1945	22.4451	23.0042	22.6088	22.1364	19.8573	21.3201	23.6746
170	22.2657		24.1525	22.7783	21.7539	22.344	22.8362	22.9345	21.7122	21.9947	19.6966	20.7893	23.4617
180	22.56	21.5981	23.7692	22.2375	21.6034	21.92	22.749	23.3443	23.0263	20.8999	21.1414	21.2873	23.1018
190	22.7484	21.9668	23.8677	21.2908	21.5473	22.3049	22.7182	23.4047	21.5585	21.5403		20.7801	22.6871
200	22.0952	21.9029	23.2685	21.7397	21.1479	22.3085	22.3567	23.1207	22.4978	21.7949	21.1104	22.0742	22.9041
210	22.2834	22.2578	22.7438	21.9503	21.5339	21.86	22.3437	23.1388	20.6449	22.357		19.072	22.5769
220	21.1621		22.9634	22.4941	20.5327	22.0167	22.6011		21.7456	20.8426	20.8606	20.7049	22.4952
230	20.2201	21.8272	22.2724	22.7917	20.6675		22.3886		20.5947	21.2007	19.86	19.7708	22.8139
240	20.7712	22.2275	22.926	23.1709	20.889	22.3318	22.1816		20.5853	20.6782	19.7634	21.0328	22.6937
250	21.0114	22.5259	22.9846	23.706	21.562	20.8325	22.5941		20.7384	21.5309	20.5444	20.8306	22.996
260	21.2061	23.0575	23.5764	23.6538	21.6912	21.2515	22.5097		21.0817	21.101	19.9356	20.4003	23.6206
270	20.6732	22.9444	23.2241	23.6887	21.7002	21.205	23.1447		21.591	22.1364		20.7872	23.8877
280	21.3347	23.4703	23.3082	23.495	21.8201	21.5173	22.9334		21.7998	22.2619		20.663	23.9671
290	21.6631	23.6681	23.3181	23.9615	21.9917	21.4197	23.0129		20.857	22.5821		20.7843	24.318
300	21.8461	23.9175		23.7819	21.824	21.6905	23.2078			22.799		21.429	24.5949
310	22.0336	24.1828		23.8896	21.9636	22.0965	22.737			22.9367		21.896	24.702
320	22.0412	23.8543		23.7831	22.1152	22.0383	23.0869			22.8872		22.4352	24.5511
330	21.9912	23.876		23.4193	22.2117	22.327	23.0462			23.3511		22.7354	24.9827
340	21.8801	23.9262		23.0318	22.416	22.4681				23.5454		22.9926	24.9661
350	21.9336			22.5291	22.3346	22.3552				23.6188		23.285
360	22.0519					22.7374				23.6394		23.6549
370						22.9506				23.5985		23.5774
380	22.5361					22.7966						23.7812
390	20.9997											24.1429
