# Supplementary material for: BUB-1 promotes amphitelic chromosome biorientation via multiple activities at the kinetochore
Source: eLife journal article supplement (doi:10.7554/elife.40690), 2018-12-14
Supplement: supp [file elife-40690-supp-v1.zip › elife_poa_e40690_Figure_6_source_data_1.xlsx]

## Sheet: Chromosome segregation
	amphitelic	merotelic	mono-oriented
Delta_KD_bub-1 at 15°C	8	7	0
Delta_KD_bub-1 at 24°C	13	2	0
