# Supplementary material for: BUB-1 promotes amphitelic chromosome biorientation via multiple activities at the kinetochore
Source: eLife journal article supplement (doi:10.7554/elife.40690), 2018-12-14
Supplement: supp [file elife-40690-supp-v1.zip › elife_poa_e40690_Figure_6_source_data_2.xlsx]

## Sheet: WT
temperature	date	larvae	embryos	lethality
24	2018-06-01	92	3	0.0315789
24	2018-06-01	96	7	0.0679612
24	2018-06-01	95	4	0.040404
24	2018-06-01	63	2	0.0307692
24	2018-06-01	115	2	0.017094
24	2018-06-01	80	6	0.0697674
24	2018-06-01	134	2	0.0147059
24	2018-06-01	120	2	0.0163934
24	2018-06-01	107	8	0.0695652
24	2018-10-01	83	3	0.0348837
24	2018-10-01	55	0	0
24	2018-10-01	93	5	0.0510204
24	2018-10-01	57	2	0.0338983
24	2018-10-01	99	2	0.019802
24	2018-10-01	111	4	0.0347826
24	2018-10-01	110	2	0.0178571
24	2018-10-01	49	5	0.0925926
24	2018-10-01	94	5	0.0505051
24	2018-10-01	110	2	0.0178571
24	2018-10-01	62	3	0.0461538
24	2018-10-01	94	3	0.0309278
24	2018-10-01	110	6	0.0517241
15	2018-06-01	28	0	0
15	2018-06-01	31	6	0.162162
15	2018-06-01	41	3	0.0681818
15	2018-06-01	38	1	0.025641
15	2018-06-01	53	6	0.101695
20	2018-06-01	98	6	0.0576923
20	2018-06-01	108	6	0.0526316
20	2018-06-01	131	1	0.00757576
20	2018-06-01	106	8	0.0701754
20	2018-06-01	82	2	0.0238095
20	2018-06-01	84	4	0.0454545
20	2018-06-01	93	9	0.0882353
20	2018-06-01	102	10	0.0892857
20	2018-10-01	61	4	0.0615385
20	2018-10-01	57	5	0.0806452
20	2018-10-01	59	2	0.0327869
20	2018-10-01	66	0	0
20	2018-10-01	81	1	0.0121951
20	2018-10-01	58	2	0.0333333
20	2018-10-01	84	3	0.0344828
20	2018-10-01	59	3	0.0483871
20	2018-10-01	64	1	0.0153846
20	2018-10-01	87	1	0.0113636
20	2018-10-01	60	4	0.0625
20	2018-10-01	70	5	0.0666667
20	2018-10-01	97	2	0.020202
20	2018-10-01	72	6	0.0769231
20	2018-10-01	68	2	0.0285714

## Sheet: DeltaKD
temperature	date	larvae	embryos	lethality
24	2018-06-01	37	31	0.455882
24	2018-06-01	25	46	0.647887
24	2018-06-01	32	65	0.670103
24	2018-06-01	24	19	0.44186
24	2018-06-01	35	50	0.588235
24	2018-06-01	32	52	0.619048
24	2018-06-01	19	60	0.759494
24	2018-06-01	32	47	0.594937
24	2018-06-01	36	52	0.590909
24	2018-06-01	32	25	0.438596
20	2018-06-01	19	70	0.786517
20	2018-06-01	53	33	0.383721
20	2018-06-01	33	20	0.377358
20	2018-06-01	9	38	0.808511
20	2018-06-01	36	55	0.604396
20	2018-06-01	10	66	0.868421
20	2018-06-01	27	82	0.752294
20	2018-06-01	36	65	0.643564
20	2018-06-01	27	57	0.678571
20	2018-06-01	24	52	0.684211
20	2018-06-01	20	46	0.69697
20	2018-06-01	15	23	0.605263
20	2018-06-01	16	70	0.813953
20	2018-06-01	29	73	0.715686
15	2018-06-01	1	32	0.969697
15	2018-06-01	3	37	0.925
15	2018-06-01	1	30	0.967742
15	2018-06-01	1	17	0.944444
15	2018-06-01	1	34	0.971429
15	2018-06-01	2	34	0.944444
15	2018-06-01	0	39	1
15	2018-06-01	1	32	0.969697
15	2018-06-01	2	42	0.954545
15	2018-06-01	2	41	0.953488
