# Supplementary material for: BUB-1 promotes amphitelic chromosome biorientation via multiple activities at the kinetochore
Source: eLife journal article supplement (doi:10.7554/elife.40690), 2018-12-14
Supplement: supp [file elife-40690-supp-v1.zip › elife_poa_e40690_Figure_6_source_data_3.xlsx]

## Sheet: lethqlity
condition	date	larvae	embryos	lethality
WT	2018-06-01	92	3	0.0315789
WT	2018-06-01	96	7	0.0679612
WT	2018-06-01	95	4	0.040404
WT	2018-06-01	63	2	0.0307692
WT	2018-06-01	115	2	0.017094
WT	2018-06-01	80	6	0.0697674
WT	2018-06-01	134	2	0.0147059
WT	2018-06-01	120	2	0.0163934
WT	2018-06-01	107	8	0.0695652
WT	2018-10-01	83	3	0.0348837
WT	2018-10-01	55	0	0
WT	2018-10-01	93	5	0.0510204
WT	2018-10-01	57	2	0.0338983
WT	2018-10-01	99	2	0.019802
WT	2018-10-01	111	4	0.0347826
WT	2018-10-01	110	2	0.0178571
WT	2018-10-01	49	5	0.0925926
WT	2018-10-01	94	5	0.0505051
WT	2018-10-01	110	2	0.0178571
WT	2018-10-01	62	3	0.0461538
WT	2018-10-01	94	3	0.0309278
WT	2018-10-01	110	6	0.0517241
D814N	oct-18-1	96	3	0.030303
D814N	oct-18-1	82	2	0.0238095
D814N	oct-18-1	86	3	0.0337079
D814N	oct-18-1	49	2	0.0392157
D814N	oct-18-1	67	0	0
D814N	oct-18-1	89	1	0.0111111
D814N	oct-18-1	90	4	0.0425532
D814N	oct-18-1	80	1	0.0123457
D814N	oct-18-1	84	4	0.0454545
D814N	oct-18-1	75	0	0
D814N	oct-18-1	82	1	0.0120482
D814N	oct-18-1	65	3	0.0441176
D814N	oct-18-2	76	1	0.012987
D814N	oct-18-2	94	3	0.0309278
D814N	oct-18-2	109	2	0.018018
D814N	oct-18-2	79	2	0.0246914
D814N	oct-18-2	80	3	0.0361446
D814N	oct-18-2	93	3	0.03125
D814N	oct-18-2	107	3	0.0272727
D814N	oct-18-2	85	3	0.0340909
D814N	oct-18-2	98	6	0.0576923
D814N	oct-18-2	90	10	0.1
D814N	oct-18-2	81	10	0.10989
D814N	oct-18-2	77	1	0.0128205
D814N	oct-18-2	91	5	0.0520833
K718R;D847N	2018-06-01	62	35	0.360825
K718R;D847N	2018-06-01	44	12	0.214286
K718R;D847N	2018-06-01	29	30	0.508475
K718R;D847N	2018-06-01	41	12	0.226415
K718R;D847N	2018-06-01	65	17	0.207317
K718R;D847N	2018-06-01	74	19	0.204301
K718R;D847N	2018-06-01	34	14	0.291667
K718R;D847N	2018-06-01	77	14	0.153846
K718R;D847N	2018-06-01	85	21	0.198113
K718R;D847N	2018-06-01	61	31	0.336957
K718R;D847N	oct-18-1	86	16	0.156863
K718R;D847N	oct-18-1	33	3	0.0833333
K718R;D847N	oct-18-1	72	11	0.13253
K718R;D847N	oct-18-1	75	14	0.157303
K718R;D847N	oct-18-1	68	24	0.26087
K718R;D847N	oct-18-1	67	23	0.255556
K718R;D847N	oct-18-1	93	14	0.130841
K718R;D847N	oct-18-1	79	13	0.141304
K718R;D847N	oct-18-1	60	9	0.130435
K718R;D847N	oct-18-1	96	14	0.127273
K718R;D847N	oct-18-1	81	36	0.307692
K718R;D847N	oct-18-1	90	14	0.134615
K718R;D847N	oct-18-1	83	15	0.153061
K718R;D847N	oct-18-2	62	21	0.253012
K718R;D847N	oct-18-2	75	26	0.257426
K718R;D847N	oct-18-2	83	18	0.178218
K718R;D847N	oct-18-2	90	22	0.196429
K718R;D847N	oct-18-2	89	13	0.127451
K718R;D847N	oct-18-2	76	20	0.208333
K718R;D847N	oct-18-2	87	15	0.147059
mdf-1	2018-06-01	51	6	0.105263
mdf-1	2018-06-01	57	10	0.149254
mdf-1	2018-06-01	48	4	0.0769231
mdf-1	2018-06-01	46	4	0.08
mdf-1	2018-06-01	38	4	0.0952381
mdf-1	2018-06-01	70	5	0.0666667
mdf-1	2018-06-01	66	3	0.0434783
mdf-1	2018-06-01	77	8	0.0941176
mdf-1	oct-18-2	35	6	0.146341
mdf-1	oct-18-2	57	3	0.05
mdf-1	oct-18-2	43	3	0.0652174
mdf-1	oct-18-2	83	4	0.045977
mdf-1	oct-18-2	106	1	0.00934579
mdf-1	oct-18-2	75	6	0.0740741
mdf-1	oct-18-2	81	3	0.0357143
mdf-1	oct-18-2	83	5	0.0568182
mdf-1	oct-18-2	79	9	0.102273
mdf-1	oct-18-2	98	7	0.0666667
mdf-1	oct-18-2	82	4	0.0465116
mdf-1	oct-18-2	98	2	0.02
mdf-1	oct-18-2	77	10	0.114943
mdf-1	oct-18-2	50	4	0.0740741
mdf-1	oct-18-2	105	6	0.0540541
mdf-1	oct-18-2	53	6	0.101695
mdf-1	oct-18-2	69	3	0.0416667
mdf-1	oct-18-2	81	7	0.0795455
mdf-1	oct-18-2	57	6	0.0952381
mdf-1	oct-18-2	113	6	0.0504202
mdf-1	oct-18-2	98	8	0.0754717
mdf-1	oct-18-2	52	2	0.037037
mdf-1	oct-18-2	70	8	0.102564
mdf-1	oct-18-2	81	14	0.147368
mdf-1	oct-18-2	32	3	0.0857143
mdf-1	oct-18-2	46	28	0.378378
mdf-1	oct-18-2	96	2	0.0204082
mdf-1	oct-18-2	59	7	0.106061
mdf-1	oct-18-2	46	19	0.292308
mdf-1	oct-18-2	112	2	0.0175439
mdf-1	oct-18-2	77	3	0.0375
mdf-1	oct-18-2	93	5	0.0510204
mdf-1	oct-18-2	41	1	0.0238095
mdf-1	oct-18-2	106	3	0.0275229
mdf-1	oct-18-2	71	4	0.0533333
mdf-1	oct-18-2	91	7	0.0714286
