# Supplementary material for: BUB-1 promotes amphitelic chromosome biorientation via multiple activities at the kinetochore
Source: eLife journal article supplement (doi:10.7554/elife.40690), 2018-12-14
Supplement: supp [file elife-40690-supp-v1.zip › elife_poa_e40690_Figure_6_source_data_4.xlsx]

## Sheet: SKA-1
time from nebd (s)	embryo_1	embryo_2	embryo_3	embryo_4	embryo_5	embryo_6	embryo_7	embryo_8	embryo_9	embryo_10	embryo_11	embryo_12	embryo_13	embryo_14	embryo_15
0		-6.69604	5.49233	-25.8236	16.2307		28.7415	30.0873	-1.38535	-8.83535	-8.99893
10		-0.684709	19.3731	-12.758	35.7824		31.1423	43.0962	11.1278	3.58573	4.31709
20		7.37528	32.5446	4.16221	41.2168		38.0297	58.9705	22.1275	19.7328	17.2436
30		10.5675	35.1577	21.3273	51.9994		42.4876	67.5628	27.452	33.6964	37.9776
40		22.6747	41.8601	31.6934	47.1745		38.6481	69.8504	33.7888	43.3689	48.1416
50		32.4894	37.4705	35.1315	48.1761		36.2604	64.492	38.7435	47.7087	52.8264
60		28.4055	34.6992	48.3505	41.355		42.1201	66.7993	38.7088	51.868	46.6838
70		31.6988	40.0335	44.4891	52.2951		41.9864	62.7474	43.1717	50.6258	49.0139
80		33.7428	45.5843	44.997	50.9303		57.2091	55.437	42.9236	61.9321	54.1063
90		33.6142	53.5528	49.0901	61.4857		64.7648	66.8108	45.4626	58.2418	42.2026
100		34.3119	73.025	46.6956	61.272		80.3671	74.2992	55.093	67.7774	54.2069
110		46.1535	94.5635	60.8485	69.7815		90.6856	91.8098	64.846	65.9973	51.5534
120		46.377	115.266	76.1875	99.7718		110.345	120.403	58.0181	87.5407	73.1012
130		53.1676	131.372	100.958	86.1552		76.2564	120.321	90.5413	112.659	90.4908
140		71.2306	121.543	120.524	76.2739		47.3024	152.303	97.334	117.578	95.9115
150		78.3161	95.2699	129.586	47.7523		32.5359	64.8782	75.7388	103.08	120.945
160		109.689	53.9881	109.293	33.5501		19.896	59.4559	61.3626	84.5579	114.377
170		79.8192	35.675	69.0761	20.8002		8.09032	38.1051	28.5066	48.7851	49.1861
180		28.8313	15.8881	22.4922	16.2201		8.38758	26.064	15.0988	36.6028	36.9114
190		15.3191	17.7137	10.9458	11.8419		2.10766	23.3203	13.5925	23.2136	16.6493
200		2.72992	8.628	6.72795	9.49664		3.26804	24.9316	7.26732	18.3859	9.63453
210		-2.75473	7.19422	1.23211	7.54759		-1.11663	25.0526	6.67375	17.2838	7.46525
220		-1.63413	7.76221	-3.3371	5.62812		-2.77939	18.4456	0.432194	13.9804	7.99815
230		-6.67284	5.96453	0.594884	1.30496		-4.9288	19.3782	3.94028	11.8834	3.07825
240		-2.36027	0.140417	-4.98983	1.67842		-5.00513	15.5177	3.94829	11.2559	4.87134
250		-4.34694	-0.262922	-9.82447	1.17689		1.12058	17.4307	1.17043	3.86924	3.94547
260		-5.4131	0.186771	-12.9607	-2.144		1.52931	13.8949	2.80631	5.43602	2.69451
270
280
290
300
310
320
330
340
350
360
370
380
390
400
410
420
430
440
450
460
470
480
490
500
510
520
530
540
550
560
570
580
590
600
610
620
630

## Sheet: BUB-1
time from nebd (s)	embryo_1	embryo_2	embryo_3	embryo_4	embryo_5	embryo_6	embryo_7	embryo_8	embryo_9	embryo_10	embryo_11	embryo_12	embryo_13	embryo_14	embryo_15
0	40.5513	34.5773	14.3545	34.0451	29.2065
10	56.9101	42.8603	19.451	32.4885	58.473
20	68.9822	59.1138	35.5184	35.9238	66.1988
30	86.412	101.658	48.2852	36.5011	70.3038
40	100.6	106.643	76.2964	63.7909	107.054
50	97.9178	107.749	76.7432	79.5684	105.13
60	114.403	108.689	76.7202	87.3673	112.821
70	95.3177	101.187	82.4326	95.2203	95.5522
80	90.6938	98.1276	75.7304	76.9348	77.7296
90	81.9453	84.4123	64.0981	67.4212	70.9592
100	58.238	68.0867	57.062	57.9	50.8888
110	37.1321	51.7445	37.5112	39.8216	33.3041
120	29.2073	36.9937	31.875	32.5699	29.8019
130	19.2385	29.6886	22.3639	37.9222	21.104
140	17.1502	22.6078	21.764	32.672	19.3356
150	14.0943	16.0638	19.3179	30.2496	11.1969
160	8.5427	10.837	12.8368	17.2922	10.7871
170	7.70811	6.65675	7.13412	17.217	8.71201
180	4.57155	5.72265	7.05379	12.3379	6.99569
190	3.68681	2.04894	4.05941	7.88323	5.41857
200	2.75999	1.67767	2.86897	6.78493	4.48876
210	2.50978	0.89653	1.05683	5.31331	3.6537
220	1.63476	0.190072	0.528987	4.26413	3.59809
230	1.57876	0.211764	0.398556	3.62289	3.23528
240	1.20599	-0.530456	0.398556	2.85108	2.91317
250	0.851185	-1.30686	0.398556	2.62466	2.17553
260	0.570932	-1.2938	0.398556	1.74504	2.11305
270
280
290
300
310
320
330
340
350
360
370
380
390
400
410
420
430
440
450
460
470
480
490
500
510
520
530
540
550
560
570
580
590
600
610
620
630

## Sheet: CLS-2
time from nebd (s)	embryo_1	embryo_2	embryo_3	embryo_4	embryo_5	embryo_6	embryo_7	embryo_8	embryo_9	embryo_10	embryo_11	embryo_12	embryo_13	embryo_14	embryo_15
0	0.933785	-3.62232	-1.15786	-0.771338	-1.27801	-0.38796	-1.89719	-1.03068	-3.7848	6.89592	1.06711	5.03335
10	7.87356	2.40628	2.4257	-0.038845	0.514717	3.44541	2.00398	4.51217	0.458001	15.0873	5.00694	11.7718
20	16.0773	7.40584	9.85105	2.36632	3.05323	10.7687	6.78351	12.8202	4.38377	25.9233	10.0091	25.3496
30	27.5735	17.5127	26.491	7.70019	7.21885	14.7106	13.3663	22.682	8.82581	38.0191	17.2158	37.9467
40	41.9793	33.6558	41.4863	18.1855	16.7588	32.7381	24.0924	38.9708	18.3062	48.1357	27.8525	63.2669
50	76.063	60.3749	57.9593	34.3793	31.5933	42.5765	39.7817	46.1675	30.6001	53.9568	56.5846	72.6965
60	96.265	76.2716	73.8049	61.9847	43.725	69.2597	46.3826	61.1503	46.5163	68.4409	72.7974	76.2007
70	98.9147	86.0187	84.658	84.9003	62.215	80.3565	65.0317	78.3722	64.9165	75.0526	76.2425
80	118.249	89.5337	87.1808	79.1577	71.2166	100.424	87.4903	85.624	70.7931	88.2777	87.1211
90	137.864	92.5319	95.0487	89.385	79.7474	99.7561	73.1247	99.6349	62.6751	90.2619	87.1847
100	148.522	100.469	101.821	113.443	89.2785	119.187	76.754	99.171	74.2726	78.1151	89.2828
110	133.138	114.946	98.5793	103.608	111.801	113.716	92.0594	94.0097	74.1537	70.2745	102.937	90.7778
120	132.326	92.27	93.3317	126.203	98.1699	94.8918	84.4669	90.67	81.5849	73.2656	89.5721	84.5903
130	107.906	98.4203	106.856	93.5392	106.629	111.528	71.966	76.1101	73.9139	56.2362	80.7306	81.6151
140	106.945	85.3425	87.694	110.04	89.5409	91.5668	65.7388	64.7191	73.4112	59.2725	62.5417	80.4325
150	98.3733	96.1624	106.736	82.9071	92.3062	109.64	62.1157	63.7609	65.102	34.2918	64.9823	60.3204
160	79.6656	69.8998	75.0528	85.5546	74.9958	75.7914	45.1547	47.0454	60.8742	26.3893	48.9443	42.6832
170	47.6342	38.996	66.9795	37.1461	47.0839	55.8761	45.2177	27.1125	41.5344	16.9152	42.9849	25.8429
180	26.1282	29.0288	36.3629	31.0708	33.5189	34.8884	29.7105	26.3897	23.7552	11.2684	18.642	17.0312
190	16.5966	21.8204	23.8531	17.6993	22.2527	21.0351	15.6116	13.6363	19.4609	9.25066	16.9124	10.3833
200	11.475	8.61892	13.8345	9.10665	11.9054	13.2082	9.86984	10.391	8.28009	7.59814	7.9295	8.85642
210	7.65022	6.73202	9.20733	5.02419	9.86492	8.9067	5.6746	7.13788	6.94412	6.02406	6.49385	6.72501
220	5.83603	3.07306	6.76625	3.63824	7.59772	6.77951	4.20224	5.65668	4.14432	5.77844	4.42346	5.63242
230	4.51713	2.40916	4.61804	2.32891	5.97028	6.26716	3.13657	5.00531	3.62947	5.06981	3.16551	3.55236
240	4.29509	1.85024	4.54734	1.48964	5.21958	4.98913	2.47887	4.87957	2.13468	4.66735	3.17142	3.83462
250	2.19972	0.662784	3.2782	1.08123	4.16611	4.49074	2.26376	4.44023	2.15125	4.04	2.30093	2.19984
260	1.16305	-0.160402	2.55419	-0.420231	3.85461	3.325	2.07923	4.33805	1.00672	2.61239	1.3906	0.64024
270
280
290
300
310
320
330
340
350
360
370
380
390
400
410
420
430
440
450
460
470
480
490
500
510
520
530
540
550
560
570
580
590
600
610
620
630

## Sheet: DNC-2
time from nebd (s)	embryo_1	embryo_2	embryo_3	embryo_4	embryo_5	embryo_6	embryo_7	embryo_8	embryo_9	embryo_10	embryo_11	embryo_12	embryo_13	embryo_14	embryo_15
0	-8.49491	-7.42001		15.9149
10	-7.74113	-1.94062		12.4403	4.45568
20	9.2764	5.35231	-5.29044	23.5787	10.8996
30	18.4579	22.7962	1.26822	31.7996	15.0288
40	33.7631	31.6369	14.2475	48.7473	18.5348
50	42.6653	48.5607	34.5758	45.4568	32.2983
60	56.6118	60.5768	63.1131	42.7766	52.2908
70	76.0892	78.8829	75.5586	71.3079	77.3794
80	71.7823	68.173	103.032	65.5646	84.1999
90	86.3021	76.8595	105.69	89.8385	90.409
100	90.7805	93.627	113.699	100.607	101.287
110	75.0528	88.72	108.934	94.3327	90.3736
120	76.2995	85.3497	109.442	88.1691	83.6717
130	97.0211	115.898	90.9192	82.7863	79.3454
140	66.817	90.322	81.1747	69.2725	88.3171
150	56.7134	96.753	77.8255	58.4109	88.1305
160	52.8337	68.7574	89.9835	46.6551	69.5621
170	36.2903	53.5564	78.5641	40.4251	60.7577
180	38.7365	44.9729	64.4168	41.0024	38.0557
190	30.5246	41.2997	57.8435	36.9561	40.677
200	23.5479	29.2386	40.4894	33.2653	29.252
210	22.6344	29.7026	39.13	29.4599	28.7673
220	19.2608	27.0216	36.6403	33.0255	24.1353
230	18.6561	25.9655	28.473	25.7178	23.3456
240		23.9167	32.719	27.4822	21.3587
250		21.6502	28.8934	25.6378	18.7692
260			29.3313	23.4894	17.0294
270
280
290
300
310
320
330
340
350
360
370
380
390
400
410
420
430
440
450
460
470
480
490
500
510
520
530
540
550
560
570
580
590
600
610
620
630
